# Supplementary material for: Leptin-a mediates transcription of genes that participate in central endocrine and phosphatidylinositol signaling pathways in 72-hour embryonic zebrafish (Danio rerio)
Source: PeerJ. 2019 May 3;7:e6848. doi: 10.7717/peerj.6848 (PMC6501765; doi:10.7717/peerj.6848)
Supplement: Figure S5 — Genelist for microarrays used in analysis. [file peerj-07-6848-s005.xlsx]

## Sheet: Probeset
PROBEID	SYMBOL	ENTREZID	CONTROL1	CONTROL2	CONTROL3	CONTROL4	CONTROL5	CONTROL6	CONTROL7	CONTROL8	MO1	MO2	MO3	MO4	RS1	RS2	RS3	RS4
12916001	NA	NULL	4.45533	5.84823	4.50696	3.98541	5.97636	5.74372	4.89015	5.4074	4.40897	5.4368	4.17675	3.90845	4.87974	5.14622	5.34138	5.78813
12916003	NA	NULL	2.93256	4.09524	2.4834	2.82595	4.24961	3.68952	3.30526	3.78495	3.24998	4.15492	1.92744	3.62521	2.9978	3.61542	3.95694	2.66486
12916005	NA	NULL	4.83553	5.63812	2.77051	3.29327	5.96235	6.92079	5.53769	5.1833	3.39509	5.4197	2.90482	4.90624	3.53048	2.69654	4.40704	3.6644
12916007	NA	NULL	4.52464	5.81995	3.5022	4.24311	4.99837	5.5362	5.16364	5.07216	3.46423	5.10703	3.67895	5.04809	5.15788	5.2644	5.04018	5.23105
12916009	NA	NULL	1.69893	1.93737	1.48327	1.47221	1.90773	2.06897	1.86193	1.6251	1.69544	1.63206	1.70578	1.76992	1.53783	1.54298	1.49006	1.43567
12916011	NA	NULL	6.38929	6.68425	4.92956	5.05208	6.97639	7.12213	6.35695	6.58227	5.34246	6.32886	4.80437	5.35788	5.22361	4.92924	5.36247	5.07353
12916013	NA	NULL	5.73154	6.82264	3.72498	4.18759	6.24863	6.77956	6.13384	6.03232	4.50548	6.87084	4.61163	4.83153	6.22588	6.2189	5.61809	5.41653
12916015	NA	NULL	3.71306	4.74407	3.18271	2.77787	4.75	3.48489	4.59295	4.5167	4.10968	4.47075	3.87865	4.33419	3.15718	3.93387	2.84132	4.48251
12916017	NA	NULL	7.28147	7.37553	4.04464	4.25636	6.58757	7.42983	6.27369	7.19183	6.15548	7.01305	4.09099	6.82907	5.24247	5.69742	5.67912	5.38726
12916019	NA	NULL	3.80526	4.21741	3.13425	1.78892	3.40154	3.38788	3.88811	3.6496	2.88771	3.77914	2.40153	2.99553	3.07232	2.06865	2.61777	2.7258
12916021	NA	NULL	5.52987	6.58854	1.87498	2.69666	5.92944	7.0003	5.35573	6.68553	4.72068	5.91513	2.56817	3.25475	4.92699	4.74197	3.95243	4.45737
12916023	NA	NULL	4.96841	5.84447	2.23145	3.99959	5.14601	5.11727	5.00305	5.04624	4.91525	5.4385	4.24143	4.26178	4.07773	4.09094	4.41404	4.34383
12916025	NA	NULL	4.22261	4.88694	2.2702	2.66379	4.76324	5.38099	4.41098	4.4457	3.6558	5.21528	3.09988	2.67007	3.80366	5.2849	3.69286	3.52195
12916027	NA	NULL	5.29918	5.86419	4.216	4.1709	5.56667	6.07903	5.27071	5.80787	4.36062	5.97687	3.64669	4.55387	4.23141	4.2921	4.5437	4.26551
12916029	NA	NULL	8.01861	8.05832	5.62515	6.32579	8.67769	8.6634	7.82177	7.90894	6.46246	7.72877	6.46806	6.60496	7.10839	6.87069	7.17324	7.10446
12916031	NA	NULL	9.60162	9.53061	8.3046	8.49632	9.51978	9.49128	9.26693	9.48038	8.74689	9.15576	8.06896	8.45084	8.88779	8.51498	9.06074	8.62631
12916033	NA	NULL	10.2305	10.3706	10.0974	9.83029	10.381	10.5574	9.88558	10.1242	10.1696	9.759	9.97018	9.9571	9.88283	9.4237	9.84244	9.95427
12916035	NA	NULL	9.99994	9.76002	8.83156	9.29153	9.99805	10.0679	10.1019	10.2678	9.71999	9.85176	8.69896	8.73275	10.3612	9.95739	9.98069	10.1978
12916037	NA	NULL	9.89036	9.44156	9.4697	9.66597	9.68221	9.66951	9.81689	9.64617	9.67286	9.1026	9.29826	9.20681	9.50138	9.3263	9.36053	9.58889
12916039	NA	NULL	10.8549	10.8677	10.3655	10.2641	10.7381	10.7338	10.9981	10.8639	10.2947	10.5078	10.0589	10.1362	10.5511	10.5231	10.4669	10.5475
12916041	NA	NULL	7.11801	7.67727	3.94124	3.32713	7.35049	7.31049	7.13982	7.28973	6.38478	6.9654	4.45652	5.15562	6.56523	6.27128	6.49364	6.70096
12916043	NA	NULL	5.82491	6.0953	3.7	2.5682	6.1704	6.3937	5.99919	5.69856	4.38116	5.55835	2.45794	3.67385	3.62377	4.08625	3.54557	4.79291
12916045	NA	NULL	6.1707	6.78633	2.68861	2.38061	7.38685	7.21246	6.59941	6.76656	5.53024	5.77663	1.75391	3.00329	4.22967	4.02415	3.52153	4.58564
12916047	NA	NULL	3.83959	3.05448	1.90346	2.71488	3.58015	4.03395	4.3521	2.92144	3.0363	3.35566	1.72637	1.62912	3.31352	3.27062	2.45894	3.0068
12916049	NA	NULL	5.93243	6.17903	4.17557	3.5428	7.00375	7.16245	6.05892	6.05205	5.50795	6.16196	3.83686	4.2243	4.77066	5.35115	4.67613	5.56926
12916051	NA	NULL	7.42115	7.05437	5.01135	5.37324	8.04756	8.15949	6.72794	7.63921	6.7714	6.94195	5.13217	5.5722	6.15307	6.05181	5.64099	5.17285
12916053	NA	NULL	5.20373	5.39754	4.35164	3.99431	5.4424	6.08581	4.54119	4.78892	4.68897	4.69005	3.5135	3.96948	4.89532	5.14257	4.75775	4.80075
12916055	NA	NULL	4.15008	3.71073	3.77536	2.89674	5.42516	5.38482	3.7351	4.39973	4.23321	3.70421	3.24517	3.92551	5.05227	4.5214	4.08342	4.66588
12916057	NA	NULL	4.57413	4.50925	5.10263	5.48092	4.78168	5.18559	4.80337	5.17975	3.79589	4.77928	4.4264	5.08635	6.9549	6.97926	7.14989	6.72247
12916059	NA	NULL	4.58232	3.84259	4.33007	3.86804	4.99388	4.47228	4.66863	5.0265	3.91647	4.47615	4.31454	2.96635	2.98129	2.69313	3.15825	2.66641
12916061	NA	NULL	1.76079	1.42801	1.79456	1.77188	1.89769	1.85458	1.97637	1.72277	1.76797	1.59211	2.16434	1.74657	2.07143	2.78359	2.75662	2.86719
12916063	NA	NULL	2.17166	2.65869	2.64356	2.44325	2.06161	2.03001	2.31058	2.33486	2.11401	2.07698	2.47499	2.19776	3.29245	2.27108	2.27831	2.67004
12916065	NA	NULL	3.25254	4.43347	4.91494	5.43224	3.38899	4.26569	3.22024	4.16414	2.9335	4.45498	2.91393	3.87921	4.52243	4.72173	4.67249	5.36626
12916067	NA	NULL	3.13646	3.49804	3.01542	3.93065	2.98913	3.74693	3.33892	3.84609	3.232	3.64885	4.30452	3.35236	2.66564	2.97553	2.94441	3.2143
12916069	NA	NULL	1.58736	1.52525	1.65299	2.00886	2.10131	2.1897	1.68875	1.72266	1.69893	1.38953	2.13475	3.56848	1.84058	2.26863	1.81938	1.75329
12916071	NA	NULL	3.92985	2.64417	3.95265	5.2198	2.40391	3.16783	4.73823	2.87468	3.75625	3.17071	6.36137	3.64596	2.60024	3.72076	3.47342	3.17632
12916073	NA	NULL	1.87257	1.85954	2.15426	1.90592	1.9139	1.8837	1.92743	2.23597	1.51983	2.22747	1.59878	2.37963	2.73118	2.67474	2.93642	2.50579
12916075	NA	NULL	1.70937	2.24374	3.11773	2.24048	2.06101	2.42156	2.06043	2.06669	1.98627	2.33907	1.86903	1.95632	2.08367	1.86543	1.81737	2.53862
12916077	NA	NULL	1.83568	2.04659	2.01598	1.84527	1.74195	1.75726	2.07506	1.92161	1.67272	1.7777	1.71308	1.67334	1.9846	1.88222	2.38382	2.24884
12916079	NA	NULL	2.15224	1.69761	3.13771	2.01558	2.00902	1.96134	2.02992	2.26964	1.92333	2.05381	2.01788	2.06558	2.05374	3.39034	2.19767	2.62555
12916081	NA	NULL	1.80547	1.81595	1.88955	2.59602	1.71391	2.40152	2.16519	3.01048	1.91503	1.62105	2.51646	2.18233	3.0936	2.29027	2.48501	2.71647
12916083	NA	NULL	2.40854	3.80621	5.45862	3.95195	2.85549	2.05011	3.85165	3.25085	3.37674	2.79308	3.60613	4.48769	5.56642	5.17469	4.81802	4.79997
12916085	NA	NULL	2.66417	2.76491	3.53881	4.02442	2.43869	2.25399	4.12048	2.57411	3.36423	3.25481	2.92028	3.07565	2.47683	3.03611	2.97748	3.45028
12916087	NA	NULL	3.76671	4.07851	3.78054	3.72777	3.22172	2.85518	3.72564	3.46482	3.04483	3.31374	3.45337	3.37675	5.84447	5.60477	4.9941	5.90818
12916089	NA	NULL	2.26727	2.4553	1.9472	2.24439	2.03637	2.03834	2.04401	2.18453	2.12789	2.21642	1.8987	1.831	1.89771	2.57797	2.19975	2.83907
12916091	NA	NULL	2.6731	1.91118	2.82841	2.79686	1.79183	1.78464	1.9634	2.01975	2.15409	2.21884	4.1572	1.98833	1.77972	1.82515	1.99978	1.60135
12916093	NA	NULL	1.86292	1.88058	1.7935	1.79193	1.75359	1.91581	2.21179	1.97275	1.78353	2.07808	1.69522	1.73768	1.76848	1.81013	1.82834	1.86576
12916095	NA	NULL	1.80698	1.68655	2.05274	2.267	1.75173	1.63508	1.88108	1.73655	1.8704	1.69029	1.5725	1.64017	2.91161	1.88462	1.91932	1.95258
12916097	NA	NULL	2.73974	2.02498	4.2023	2.01951	2.35968	2.73939	3.26314	2.50536	3.49315	3.09286	2.2836	2.68585	4.67949	4.5545	4.0672	4.84639
12916099	NA	NULL	2.26998	3.31625	3.18405	4.37001	3.20425	3.18963	3.50176	3.21844	4.03565	3.35983	3.49624	2.949	4.47078	3.54277	4.61208	4.6649
12916101	NA	NULL	3.3976	4.05409	3.18138	3.68923	2.49573	2.67087	3.21107	4.032	3.15284	4.05065	2.42725	2.83806	4.6306	4.4927	4.18454	4.86524
12916103	NA	NULL	4.37427	4.10462	5.33098	4.0735	3.91352	4.43989	4.61545	3.55057	4.68064	4.80748	3.46372	4.29222	5.30132	6.12458	6.09836	5.41428
12916105	NA	NULL	4.70343	5.79634	6.77675	6.72117	4.68091	4.98176	5.76221	5.48937	4.53062	5.50468	6.54337	6.01478	6.91822	7.939	7.35706	7.49757
12916107	NA	NULL	3.27154	3.69062	4.00069	4.26742	3.16226	3.16413	3.55422	3.94849	3.44333	3.96476	4.1255	3.66934	4.44915	4.18659	3.83419	4.61975
12916109	NA	NULL	3.74538	3.98642	5.77859	6.21112	3.94418	4.34509	3.71064	4.81737	4.03951	4.84596	5.59955	5.62464	5.31365	5.89686	6.09313	5.12832
12916111	NA	NULL	7.86931	7.79704	9.88232	10.1124	7.1851	7.26789	6.88991	7.56435	7.29699	7.25828	8.6915	9.48841	9.84297	9.84419	9.73205	9.749
12916113	NA	NULL	3.85678	4.26786	5.53643	5.33565	4.38476	3.77239	4.97227	3.50876	3.44148	4.03098	4.66291	5.24505	5.33099	4.58236	4.71932	5.04045
12916115	NA	NULL	2.35513	2.8071	3.05207	2.79209	2.47223	3.25784	2.17394	2.51902	2.49415	2.56256	3.56115	2.71246	3.96605	3.9876	3.50305	3.38723
12916117	NA	NULL	3.56548	2.60323	4.41709	3.45333	3.03412	2.73513	4.3719	3.17969	3.44537	3.93569	2.89488	4.02206	5.46213	5.25157	5.76642	5.10734
12916119	NA	NULL	2.58697	2.37998	2.90342	2.56661	1.80474	1.97049	2.18188	2.08125	2.45266	2.53484	2.10138	3.4777	2.80042	2.52691	2.64261	2.37242
12916121	NA	NULL	3.93608	4.37026	4.67749	6.13962	4.62368	3.95032	4.32168	4.46755	4.76083	4.24619	4.82342	5.30033	6.3896	5.92909	6.07849	6.00297
12916123	NA	NULL	4.9802	3.90304	3.82051	4.17822	4.47878	4.76017	4.89138	3.76135	4.73138	4.0881	3.73507	3.69383	4.00361	4.77245	4.00897	5.26425
12916125	NA	NULL	2.93026	2.71255	2.85833	3.22498	2.47179	2.13628	2.96008	2.36662	2.49382	2.95571	2.60677	2.89305	2.88026	2.97806	3.38707	3.03504
12916127	NA	NULL	2.39084	2.10645	2.76736	2.31775	2.61126	2.33873	3.03125	2.54798	2.28338	2.35477	2.34222	2.40327	3.1103	2.29989	2.0627	2.44541
12916129	NA	NULL	1.58615	2.25637	1.67434	1.64136	1.65911	1.90658	1.78504	1.89741	1.52873	1.74774	1.76089	1.71668	1.55956	1.86126	1.69385	1.85797
12916131	NA	NULL	3.07585	2.89463	2.59015	2.8111	2.54508	3.45414	3.1514	3.11319	2.98564	3.35049	2.87683	3.11773	3.53943	3.39549	3.43611	3.177
12916133	NA	NULL	1.5764	2.00319	2.02653	2.17262	2.19523	2.12995	1.88315	2.34576	1.695	1.79563	1.9244	2.05748	2.15908	1.9785	2.20748	2.25829
12916135	NA	NULL	2.89848	2.69082	2.62889	3.25862	1.89598	2.46564	3.05749	1.73545	2.50678	1.6631	1.79562	1.99679	3.71591	2.90066	3.77243	5.00692
12916137	NA	NULL	2.15572	2.55783	2.03417	2.09726	2.53975	2.28242	2.32531	2.3099	2.71085	2.77029	2.28903	2.08743	2.32697	2.27703	2.42186	2.09613
12916139	NA	NULL	2.57965	2.89135	3.34047	4.00975	4.21532	3.51046	3.82743	2.59843	2.88721	2.64148	3.36434	3.65573	4.42261	5.37518	3.43227	3.86471
12916141	NA	NULL	6.01638	5.59611	5.07836	6.73954	5.30249	5.29068	5.83477	5.3429	5.29751	4.80012	5.29638	6.13693	5.45322	6.9129	6.12549	6.28286
12916143	NA	NULL	2.22475	2.07493	2.16894	1.97521	2.20274	2.0684	2.9038	2.1956	2.14359	2.92614	1.94471	1.79573	2.15416	1.93128	2.77669	3.00582
12916145	NA	NULL	2.67657	2.78574	3.59929	3.36621	2.52248	2.93692	3.57202	3.31991	2.97097	3.46511	3.50823	3.16913	3.67433	3.89379	3.33374	3.84443
12916147	NA	NULL	5.2755	5.96391	6.25656	6.48176	5.70388	5.45953	6.08208	6.45952	5.63786	6.49122	6.30967	6.05103	7.31909	7.59129	7.34608	7.59305
12916149	NA	NULL	1.93867	3.26816	2.8717	2.93834	2.47347	2.74491	2.46879	3.3317	2.09081	2.74615	2.29227	3.57005	3.23404	3.31548	3.7255	2.57778
12916151	NA	NULL	1.84968	2.04226	1.63193	2.1107	2.16507	1.99588	2.67242	2.04834	2.42794	2.20507	1.95015	2.05028	1.88668	2.11282	2.45633	2.57842
12916153	NA	NULL	2.47522	2.27017	2.14867	2.17207	2.20434	2.19005	2.64409	2.46006	2.07909	1.97391	2.51079	2.41302	2.25042	2.88977	2.99288	3.01297
12916155	NA	NULL	3.98511	3.41305	3.68883	3.7056	3.41987	3.43661	3.32659	2.87605	3.46228	3.46181	3.41948	3.52529	4.56725	3.3331	4.15262	4.30685
12916157	NA	NULL	4.39893	3.91181	5.18287	5.62046	4.20603	4.2964	4.61163	3.88022	4.13743	4.31841	4.93804	4.93085	4.7898	4.89942	4.6394	4.93831
12916159	NA	NULL	2.50827	1.97708	3.08939	2.89446	2.59402	2.33715	3.53852	3.72081	1.95196	2.68538	3.35945	2.8121	3.83673	3.48428	3.39676	3.67727
12916161	NA	NULL	3.94158	4.33951	4.64433	2.97958	4.49784	4.35409	4.6297	4.26873	4.59249	4.66231	3.79582	4.53247	4.32495	4.18689	4.46278	4.34189
12916163	NA	NULL	3.33501	3.33956	4.66435	4.09751	3.22354	3.44414	4.61	4.20808	4.60085	4.08701	3.94932	4.5769	3.94586	4.9459	3.51392	4.95248
12916165	NA	NULL	2.03227	3.04748	2.23275	3.3086	2.03329	1.64289	2.68085	2.53744	1.84242	2.19648	2.39335	1.87347	2.41072	1.8337	1.85292	2.46593
12916167	NA	NULL	4.25547	4.28528	3.85249	5.44059	3.76539	3.71219	3.94734	4.19983	3.55132	4.23851	3.6234	4.3329	4.87364	5.02287	4.28518	4.36526
12916169	NA	NULL	3.09508	3.01647	3.37937	3.62647	2.33989	3.27237	2.8447	3.06612	3.13312	3.49355	3.82156	2.87042	1.9831	3.1324	2.48685	2.86818
12916171	NA	NULL	2.31968	2.97982	3.24089	3.15613	2.23623	2.03058	3.06619	2.72883	2.97859	3.74801	2.77868	3.51761	3.4669	3.06823	3.51161	3.58525
12916173	NA	NULL	2.22051	2.63233	3.44272	2.28548	2.30617	2.26317	2.23138	2.24948	1.92163	2.60834	1.98939	2.88583	2.25978	2.1763	2.68773	2.86217
12916175	NA	NULL	3.37919	2.46842	3.14822	2.52795	2.82719	2.3126	3.28095	1.85528	2.84655	3.20464	3.4137	4.06196	3.21647	3.3551	3.63297	2.66739
12916177	NA	NULL	1.80829	1.92813	2.47189	1.99263	2.00699	1.91287	2.21475	2.0557	2.1728	2.11698	1.80402	1.90009	2.07566	1.88968	2.06461	2.05917
12916179	NA	NULL	6.39948	6.31745	8.50857	8.13966	5.36402	5.73072	6.14732	6.59265	5.57158	6.26341	7.26796	7.6942	7.60803	7.93022	7.74106	8.30588
12916181	NA	NULL	1.82253	1.8144	3.4458	3.70316	2.45878	2.32753	2.39359	1.97564	3.20197	2.4592	3.80331	3.905	3.23433	3.60597	3.69766	3.73033
12916183	NA	NULL	1.71426	2.0536	1.61957	1.59969	1.82383	1.59383	1.76674	2.10266	2.07255	1.6485	1.82288	1.83393	2.10036	1.67904	1.86768	1.85426
12916185	NA	NULL	2.3981	2.30066	2.92336	2.81297	2.02026	1.98709	2.7606	2.42562	2.71316	2.63504	2.3361	2.03213	2.97894	3.0529	2.63889	2.84095
12916187	NA	NULL	3.24333	3.18236	4.09047	3.40917	3.68559	3.46384	3.31465	3.83947	3.20292	4.60799	2.70469	3.27974	4.89164	3.47308	3.11419	3.93651
12916189	NA	NULL	3.51978	3.71154	4.63231	4.40269	2.64142	3.60705	3.75661	2.48476	3.7199	3.86363	3.98093	4.93987	4.19584	4.40085	4.03206	4.47387
12916191	NA	NULL	3.66579	3.67256	4.03761	4.62836	2.72433	3.00636	3.76357	3.42063	2.98272	3.99791	3.39857	3.59253	3.95024	4.18015	3.9917	5.15568
12916193	NA	NULL	2.85619	2.62099	3.72255	4.59157	2.78459	2.9984	2.88043	2.77691	3.44905	2.72017	3.99327	3.723	3.46537	2.64404	3.01245	2.72678
12916195	NA	NULL	3.18951	4.59475	4.80495	3.82337	3.73026	4.03304	4.61245	3.98267	2.8991	4.70809	4.49681	3.07827	3.91305	5.06497	5.17939	4.15348
12916197	NA	NULL	3.23459	3.40327	3.42179	3.81629	3.06963	2.7396	3.92776	3.6124	2.68346	4.02929	4.20815	3.70836	3.27391	3.56776	3.09907	3.38836
12916199	NA	NULL	3.10413	2.86383	2.66214	2.7395	3.04361	2.68902	2.12824	2.88041	2.99144	2.87678	1.9149	2.93302	2.59974	2.4459	3.01636	3.27247
12916201	NA	NULL	4.70365	5.80003	5.64895	6.3634	3.47341	5.40058	5.36561	5.84086	5.4624	5.58713	5.35607	5.63369	6.67526	4.75868	5.36696	5.66197
12916203	NA	NULL	3.02604	4.87669	5.05913	4.6224	3.23701	4.79792	4.01837	3.2254	3.51392	4.92256	3.41063	4.11548	3.83656	4.57185	3.89065	3.88468
12916205	NA	NULL	4.4732	5.85716	5.76894	6.87721	5.55749	5.55973	5.59625	5.45462	5.07185	5.55315	5.51648	6.52958	5.57864	6.08107	5.15531	5.69957
12916207	NA	NULL	3.1972	2.05283	3.41136	4.48271	2.9309	3.68119	4.40468	3.46587	3.55695	3.43501	3.37949	3.91959	3.80996	4.52135	4.47269	3.20817
12916209	NA	NULL	1.57339	1.70944	2.4038	1.86211	1.81901	1.45192	1.75368	1.76756	1.73231	2.20736	1.66527	1.81933	1.67022	1.75042	1.61748	2.19208
12916211	NA	NULL	4.42325	2.85629	4.47963	4.43847	4.08444	4.41647	4.83254	4.58231	4.52416	3.81241	4.19456	4.20238	5.1816	5.70393	4.65358	5.23268
12916213	NA	NULL	7.42307	7.94409	7.60941	8.57478	5.65902	6.42557	6.3264	7.32486	6.3149	7.54916	7.97743	7.87748	7.7819	7.83143	7.79198	7.73695
12916215	NA	NULL	2.34913	2.30396	2.05056	2.3222	2.47801	2.72871	2.79245	2.29531	2.6366	2.26564	2.25744	2.64366	4.00043	3.53378	3.69757	3.28382
12916217	NA	NULL	2.86398	3.92118	3.44999	3.05504	3.76041	3.90693	4.06083	3.45116	3.08233	4.14693	4.43226	2.87939	2.51415	2.96202	2.49562	2.79456
12916219	NA	NULL	1.55676	1.92652	1.61106	1.97828	1.70188	1.64256	1.84069	1.62338	1.85311	1.56714	1.80917	1.76258	1.56453	1.71843	1.88482	1.59318
12916221	NA	NULL	1.89854	3.35196	1.58088	1.62897	2.72433	1.88632	1.53443	3.0766	1.92746	2.41237	2.00184	2.22948	2.93548	1.52525	2.0402	1.57849
12916223	NA	NULL	3.1891	3.23615	1.94403	1.61346	2.91207	2.57746	3.57666	2.91857	3.27105	3.32538	1.83924	2.14608	2.41079	4.21134	2.65826	3.24192
12916225	NA	NULL	2.58856	2.75813	3.2499	5.08654	2.63204	2.71773	3.10727	2.47945	3.04095	2.6964	2.84001	3.86502	5.03045	4.26461	4.14878	4.73081
12916227	NA	NULL	2.5259	2.21496	2.54278	2.20203	2.41972	2.45527	2.54191	2.07358	2.43148	1.91235	1.97156	2.6137	1.94185	2.70752	2.22122	2.61711
12916229	NA	NULL	2.18317	1.8067	3.2795	2.23871	2.37747	1.88795	2.56395	1.63932	2.09249	1.52202	1.76614	2.55006	1.55784	2.07901	3.45593	3.10311
12916231	NA	NULL	4.4565	4.01962	5.11055	5.50625	4.06528	3.43337	4.33909	4.62598	4.25569	3.69833	5.85054	5.16981	4.45623	4.5988	5.4041	5.63358
12916233	NA	NULL	3.56576	4.40192	4.93319	4.26345	4.09934	4.39352	3.46784	4.04469	3.52339	3.94349	4.29369	4.6113	4.34578	4.26177	3.60962	4.25159
12916235	NA	NULL	4.14834	4.68567	4.89143	4.8615	4.5018	4.23696	4.63767	4.39624	4.79695	4.50463	5.79849	5.17094	4.2645	5.04705	4.66695	3.88815
12916237	NA	NULL	5.52311	4.92286	4.05634	3.05619	5.30938	5.17118	4.68137	4.38895	5.55236	4.71594	4.66048	4.10646	2.02368	2.67695	2.23316	2.29105
12916239	NA	NULL	1.64189	1.63613	1.7305	1.49727	1.53053	1.63357	1.59944	1.93579	1.65527	1.77914	1.63513	1.7399	1.61645	1.67901	1.55903	1.93399
12916241	NA	NULL	3.73022	3.92599	3.7447	4.42066	3.17036	3.53314	3.91806	2.44506	2.9486	3.64644	4.43907	3.41879	4.4818	4.37308	3.61282	4.10938
12916243	NA	NULL	4.16467	4.64942	5.53729	5.4748	4.40639	4.99626	4.60341	5.03796	5.06829	5.30154	4.4773	5.23921	5.68627	5.01047	5.55149	4.35823
12916245	NA	NULL	3.7806	3.95293	4.70678	5.00296	3.79014	4.07985	4.24468	4.15813	3.94642	4.1475	5.0643	4.73746	4.40916	4.61768	4.57196	5.06171
12916247	NA	NULL	1.77585	1.91559	1.77304	1.98074	2.21805	2.10308	1.47677	1.98755	1.50611	2.21866	2.0402	1.96463	2.14548	1.69255	2.00789	2.21393
12916249	NA	NULL	1.6319	1.59351	1.6913	1.88397	1.6489	1.61777	1.68875	1.64943	1.64217	1.52894	1.6664	1.6146	1.70859	1.67787	1.90097	1.74172
12916251	NA	NULL	2.20607	2.11214	3.851	2.38797	2.14408	2.23463	3.47214	2.49455	2.87446	3.20495	2.91064	2.88633	2.23912	2.62708	2.60477	2.63487
12916253	NA	NULL	2.92148	2.87259	3.89662	3.19118	3.99555	3.79894	3.41452	4.11574	3.8963	3.47545	4.91411	4.56861	4.65519	5.31243	4.65033	4.9504
12916255	NA	NULL	2.06217	2.53221	2.09119	1.82336	2.17223	1.91035	2.04539	1.88864	1.79136	2.25591	1.89728	1.89948	2.8625	2.24385	2.16612	1.6254
12916257	NA	NULL	6.20162	6.88233	8.18688	8.26488	6.23392	6.03772	6.73358	6.33598	6.13894	6.43899	7.60504	7.72683	7.77355	7.68847	7.38404	7.80439
12916259	NA	NULL	4.52412	3.61261	2.84204	2.11677	2.59351	2.46669	4.80227	4.89907	3.66242	3.75126	1.89748	2.31989	3.73437	3.85357	3.54152	3.48505
12916261	NA	NULL	5.204	3.99148	4.52286	4.32337	4.50947	4.45622	4.69543	4.34452	4.08838	4.51942	3.37381	4.61733	3.81056	3.10297	3.68695	3.92477
12916263	NA	NULL	2.508	2.32838	2.47426	3.47643	1.96753	2.81	2.8641	1.96898	2.89859	2.68738	3.75536	2.4384	2.17563	2.484	2.19376	2.31979
12916265	NA	NULL	3.00492	2.42244	2.17626	2.28394	2.54399	2.47851	2.54559	2.74154	2.61477	2.55343	1.90673	2.76363	2.60391	2.27144	2.00789	1.89784
12916267	NA	NULL	2.58039	3.17277	3.18043	3.79231	3.12795	3.10554	3.71182	2.99418	3.24404	3.27549	2.60421	3.35853	3.50606	3.11714	3.9481	3.32831
12916269	NA	NULL	1.80491	1.6334	1.75996	2.1738	1.80139	1.50315	2.58238	2.35413	1.71321	1.84	1.90198	1.74358	1.68875	1.87919	2.06897	1.73137
12916271	NA	NULL	4.65159	5.08241	6.2069	6.27249	5.43669	4.39826	5.37135	4.62377	4.35685	5.02267	5.46895	5.48623	6.72971	7.10198	6.4811	7.04711
12916273	NA	NULL	1.95848	2.10131	2.3316	2.13618	1.60207	1.88632	1.64781	1.69989	1.928	1.76297	2.34129	2.6987	1.664	2.05983	1.61224	1.41794
12916275	NA	NULL	2.3072	2.85447	1.84942	2.09121	2.34723	2.40668	2.24764	1.88812	2.20658	1.96463	3.25092	1.90918	2.24227	2.3316	3.5771	3.05585
12916277	NA	NULL	1.93793	1.90666	1.81642	1.55617	1.66716	1.96637	2.24937	1.71541	1.87989	1.87757	2.06892	2.36175	2.28549	3.55882	2.33378	2.88756
12916279	NA	NULL	1.95144	1.82617	1.72115	2.24443	1.87006	1.57755	1.98727	1.62024	2.13895	1.6561	1.82058	1.72725	2.16239	2.36924	1.98528	2.08925
12916281	NA	NULL	1.89176	1.90358	1.95089	1.54237	1.90781	1.58295	1.72713	2.17096	1.77092	1.91402	1.52911	2.34835	2.01	2.31507	1.54774	1.98671
12916283	NA	NULL	1.41369	1.71079	1.43568	1.36783	1.91286	1.41646	1.78993	1.74877	1.39069	1.70473	1.49006	1.30777	1.46721	1.69255	1.38015	1.55653
12916285	NA	NULL	1.85596	1.51247	1.55594	1.83234	1.74948	1.86705	1.73981	1.46997	1.54462	1.74856	1.53467	1.7589	1.49626	1.5238	1.74696	1.88765
12916287	NA	NULL	2.51206	3.24183	3.31971	4.08395	2.71928	3.29444	3.2268	3.28696	3.07685	3.08977	2.85561	2.66151	4.70726	4.05479	4.05538	5.31088
12916289	NA	NULL	2.71902	3.41857	4.07071	3.49267	2.49588	2.44971	2.99603	2.63992	3.52274	3.34529	3.36602	3.20183	3.99212	3.52425	4.35598	4.41787
12916291	NA	NULL	2.10354	2.59716	2.90067	2.97944	1.89715	2.26835	2.28646	2.47256	2.24714	2.59357	2.21461	2.53918	2.31536	3.17533	2.70826	3.01068
12916293	NA	NULL	3.36967	4.32216	3.70164	3.08361	3.99383	3.8679	3.72362	3.64077	3.45253	4.04302	5.0097	3.12853	2.85924	3.0766	3.46868	3.66902
12916295	NA	NULL	2.22138	1.78863	1.60449	2.16021	1.80139	2.1897	1.85627	1.5883	1.49006	1.3153	2.13475	1.6146	1.66571	1.63116	1.63513	1.55653
12916297	NA	NULL	3.46351	3.68712	4.0304	3.15918	2.98462	3.43007	4.28191	2.77033	3.06664	3.73747	2.76703	3.08213	4.5843	3.66275	4.75472	4.54111
12916299	NA	NULL	2.43702	2.53104	2.68754	2.50983	2.92943	2.39792	2.56601	2.00741	2.48959	2.34949	2.5311	2.07235	2.2763	1.91885	2.48377	2.77762
12916301	NA	NULL	4.28421	4.15548	5.30279	4.49061	3.98416	3.87468	4.27264	4.85797	3.83605	4.15043	5.13792	4.65722	5.28042	4.34326	4.89162	3.56614
12916303	NA	NULL	2.68893	3.28519	3.87279	2.80365	2.38498	1.95942	2.58144	2.35975	2.91639	3.61859	2.56225	2.05442	2.82475	4.01077	3.15674	3.08378
12916305	NA	NULL	4.49852	5.21169	4.67703	5.18818	4.69044	4.90502	5.40706	5.49735	5.1185	4.90823	4.71937	5.23115	5.40732	4.73995	5.17897	5.1518
12916307	NA	NULL	3.12116	3.27772	3.28535	3.91149	4.11341	4.60213	4.51977	4.48925	4.05167	4.13249	4.53202	4.9529	5.10496	4.34254	4.40852	4.4699
12916309	NA	NULL	9.0825	8.26969	9.87229	10.0757	7.52936	7.46932	8.63418	8.30871	8.91234	8.03628	9.93238	9.21374	8.82813	8.75637	8.92056	8.88181
12916311	NA	NULL	2.05726	2.13099	2.63071	2.57665	1.89362	1.85584	1.81664	2.11202	1.89708	2.47184	2.32173	2.22245	2.97872	3.00198	3.08177	4.00042
12916313	NA	NULL	3.56816	3.9307	5.5116	4.48006	3.33698	3.38908	3.46008	4.55348	3.76449	4.3869	4.16452	4.58177	4.60806	5.00807	5.38923	4.89616
12916315	NA	NULL	2.25149	3.03441	2.56811	3.24897	2.45975	1.95048	2.59021	2.5373	2.50688	2.55026	2.68811	2.51706	1.93793	2.1369	2.32624	2.37224
12916317	NA	NULL	2.67713	2.66769	2.65787	1.91104	2.21239	2.19835	2.3431	2.26387	2.55732	2.50769	2.14618	2.26498	2.28722	2.3117	2.23674	2.12456
12916319	NA	NULL	1.65955	1.48384	1.78109	1.75946	1.50544	1.77471	1.47306	1.58025	1.70046	1.61473	1.62456	1.57355	1.79279	1.6792	1.54524	1.92424
12916321	NA	NULL	1.67244	1.94002	2.50739	1.99358	1.55257	1.60334	1.88534	1.75526	1.55325	1.63323	1.90153	1.63244	2.05176	2.88429	1.8001	2.47852
12916323	NA	NULL	2.91768	3.10622	3.9556	3.65851	1.98534	2.35117	3.0223	2.96748	2.59596	3.29323	2.80988	3.09808	3.12605	3.7981	4.16197	3.83004
12916325	NA	NULL	2.64204	3.69105	3.94256	3.61389	2.48566	3.67275	3.59416	3.38541	4.2242	3.84609	3.45846	3.71105	4.99777	4.48992	4.98899	4.28514
12916327	NA	NULL	1.78368	1.77852	1.7963	1.9306	1.84846	2.0064	1.94615	1.62593	1.9388	2.5211	2.02722	1.57687	1.47102	1.83985	1.51267	1.63804
12916329	NA	NULL	2.94803	3.1366	3.40282	4.04844	3.1604	3.54885	2.4084	2.60159	3.12094	3.29969	3.10545	4.68495	3.61951	3.36958	3.12441	3.24946
12916331	NA	NULL	4.28033	4.19072	5.44823	5.67772	3.72857	4.20819	3.86087	4.88579	4.14236	4.85478	5.30381	4.87565	5.40783	5.91401	5.58354	5.7757
12916333	NA	NULL	3.21893	3.41296	3.11408	3.01207	3.81709	2.97404	2.88576	3.54349	2.96966	3.41138	3.76951	3.21379	3.05882	3.12766	3.18829	2.92449
12916335	NA	NULL	2.60062	2.32545	2.38508	2.80423	3.27371	2.48367	3.4528	2.79245	2.75756	2.86849	2.04869	2.46153	2.37275	2.18558	2.21386	3.05798
12916337	NA	NULL	2.30686	2.89617	3.27078	2.9896	2.67754	2.84286	3.08733	2.75936	3.19084	3.35031	2.87157	2.57374	2.15891	2.72147	3.15272	2.67117
12916339	NA	NULL	3.41034	3.64732	5.45294	4.43294	4.78446	4.77474	4.81559	3.50072	4.56269	4.35147	4.07383	5.04402	4.9277	4.76411	4.93997	4.69011
12916341	NA	NULL	4.58039	4.39442	8.41815	8.89564	5.2698	4.97186	5.4666	4.641	5.06248	5.2733	7.36947	7.8834	6.02398	5.02202	6.72882	6.20083
12916343	NA	NULL	2.16068	2.53309	3.3669	2.53622	3.04058	3.1865	2.55636	2.59993	2.76175	2.60635	4.16109	3.40929	3.32073	4.29443	3.64428	3.48556
12916345	NA	NULL	5.29722	5.62771	3.4817	4.12663	5.30257	5.27412	5.51858	5.91024	4.94243	6.39069	3.26394	4.2476	5.39067	4.6737	5.04606	4.90395
12916347	NA	NULL	1.85201	2.74538	2.08235	1.90145	2.2691	2.74048	1.91609	2.63797	1.80666	2.07394	1.94012	2.13513	2.65318	2.03596	2.47908	2.30271
12916349	NA	NULL	3.16	3.11737	2.91996	3.42518	3.04937	2.54348	4.11643	3.52101	3.39569	3.16321	4.47915	3.88387	3.80659	3.58356	3.45503	3.11432
12916351	NA	NULL	2.99313	3.89728	2.89366	2.90799	4.23263	4.07829	4.54482	3.38124	3.39284	3.99036	3.57744	4.01497	3.74722	4.05787	3.5297	3.84289
12916353	NA	NULL	5.52085	5.3004	6.26006	6.80466	4.80679	4.94526	6.49933	5.10542	5.25903	5.39433	5.65844	5.878	5.24588	5.30259	5.68624	6.00092
12916355	NA	NULL	2.65505	2.95412	1.90162	2.11903	2.80996	2.36641	3.27369	2.45583	3.49495	2.85693	1.84767	2.84389	2.59449	3.57944	3.0868	2.81608
12916357	NA	NULL	2.82846	2.10736	2.55265	2.89768	1.98399	2.28563	2.81412	2.62356	2.65551	2.00854	4.42623	2.64953	3.10773	3.35205	3.22759	2.92208
12916359	NA	NULL	2.35091	1.49697	2.23218	2.13233	1.73363	1.83422	2.31591	2.04335	2.36419	1.90076	2.17636	2.01877	2.2211	2.62616	3.7321	2.28996
12916361	NA	NULL	1.95524	2.24015	4.49976	3.43323	2.7484	3.02768	2.34944	4.07267	3.29023	2.93826	2.06136	2.72144	4.77965	4.56778	5.12068	3.94702
12916363	NA	NULL	3.0521	2.47771	1.99275	1.95396	1.99143	1.99678	2.67216	1.95982	2.60671	2.4553	2.11406	1.88588	2.93825	2.95975	2.94796	3.69625
12916365	NA	NULL	1.96792	2.08694	2.97806	2.67495	2.0695	2.24566	2.43932	2.88076	2.55846	2.52064	2.59761	2.53796	2.21586	2.47219	2.50958	2.74408
12916367	NA	NULL	1.7002	1.67506	1.59269	1.80459	1.62593	1.67042	2.10816	1.4993	1.6434	1.59253	1.55884	1.63951	1.71279	1.80961	1.69272	1.63804
12916369	NA	NULL	6.39179	4.74708	6.08178	5.91905	4.89583	5.01927	4.39601	5.1992	6.38863	4.76557	4.65278	5.32249	5.1572	5.36287	5.87943	4.75521
12916371	NA	NULL	2.26096	1.91519	2.32806	2.6456	2.05623	1.96585	2.06506	2.22588	1.83589	1.85217	1.93404	2.86061	2.39489	2.55156	2.39802	3.31727
12916373	NA	NULL	3.99309	4.07282	5.85946	4.40237	3.04588	3.82093	3.13773	3.86329	4.29398	3.6889	4.90514	5.8676	4.94351	3.66277	4.55838	4.90303
12916375	NA	NULL	3.12427	3.55801	3.30167	4.48006	3.96817	4.42412	3.72151	4.21145	4.13211	3.97775	3.78183	4.09328	3.27596	3.38489	3.52803	4.19383
12916377	NA	NULL	6.82798	6.48525	8.86016	8.2908	6.6765	7.00752	7.38198	6.11243	7.50671	6.85433	7.78497	8.08743	8.5508	7.72349	7.92658	7.77384
12916379	NA	NULL	4.30064	4.31205	4.23188	3.65884	4.55024	4.28358	4.73185	3.71535	4.5469	4.00298	3.87079	4.57694	4.40133	4.48411	4.3742	4.59104
12916381	NA	NULL	5.01955	5.20605	4.57179	3.98943	3.49352	4.36996	6.00968	4.88287	5.34083	5.04156	4.52371	5.03334	6.08375	5.67634	5.13201	5.45415
12916383	NA	NULL	3.99235	3.7063	4.02165	3.48111	4.35623	3.26372	4.76853	3.99906	4.26647	3.84388	4.28716	4.98856	4.37062	3.89163	4.27556	3.75775
12916385	NA	NULL	4.17444	5.21357	3.36934	3.21102	5.02198	4.00812	5.78042	5.05852	4.85566	5.68473	2.86262	5.01	3.95063	3.72999	3.38352	3.25926
12916387	NA	NULL	5.70733	5.73777	4.62601	3.68007	5.70899	5.92757	6.2122	5.96167	6.32329	6.72868	5.00575	4.89328	4.06006	5.10049	4.70858	4.64042
12916389	NA	NULL	1.9583	2.42313	2.637	1.99208	2.51113	2.74741	2.29245	2.69906	2.09923	1.96748	1.88158	2.30342	1.83818	2.42732	2.59461	2.97684
12916391	NA	NULL	1.74499	2.20891	2.14337	1.63912	1.87149	1.79775	1.75693	2.18846	2.02591	2.09452	1.70353	1.64658	1.6224	2.13427	1.68756	1.71033
12916393	NA	NULL	1.57228	1.59208	1.73102	1.44536	1.87485	1.7052	2.06735	1.83643	1.72411	1.81831	1.61724	1.62798	1.73975	1.95103	1.62511	1.72886
12916395	NA	NULL	3.39877	4.4269	2.63587	2.27318	3.25439	3.33174	4.42818	3.77565	4.82222	4.55522	2.31736	3.7836	3.42489	3.28064	3.70166	3.79464
12916397	NA	NULL	3.0514	2.31005	1.80907	1.71901	1.98323	2.87762	2.76408	2.14778	2.52154	2.89469	1.98644	2.03707	1.96988	2.25205	2.22088	2.68606
12916399	NA	NULL	1.69045	1.87109	1.63508	2.49815	1.94023	1.81031	1.97442	1.75292	2.19249	1.86741	1.74857	1.73151	1.89247	1.69815	1.56867	1.59127
12916401	NA	NULL	4.73701	4.38658	3.39936	3.94866	4.51903	4.66169	6.29393	4.78085	5.49086	5.40263	3.70987	3.98172	3.75471	5.56837	4.38217	4.55673
12916403	NA	NULL	3.15144	3.31223	3.26269	2.41169	4.18442	3.83524	3.90722	3.52027	4.20374	3.4925	2.71256	2.92738	3.26348	3.62506	4.73637	4.62761
12916405	NA	NULL	2.34254	2.51412	2.04292	2.07341	2.22016	2.07335	2.65547	2.37059	2.29748	2.23019	1.5808	1.89354	2.74225	2.50149	2.10047	2.8265
12916407	NA	NULL	3.80424	4.25833	4.17352	6.27429	4.29372	3.99214	3.52965	4.19658	3.16645	4.20775	5.50303	4.8549	6.89883	7.40324	6.49487	7.02745
12916409	NA	NULL	4.38073	4.20968	4.02878	4.23325	3.95973	3.80473	4.09571	3.70214	4.12608	4.28926	3.42145	4.15332	5.70988	5.09085	5.60409	5.41001
12916411	NA	NULL	2.80005	2.94339	2.20028	3.13188	2.81386	3.6067	2.41626	3.07292	3.01736	2.45496	3.70784	3.07943	2.98391	3.16974	3.55417	3.0849
12916413	NA	NULL	2.6843	3.46567	1.94453	1.61645	2.23481	2.10985	2.75	2.8504	1.84975	2.00831	2.71696	2.10645	3.16093	3.57728	2.79389	3.00893
12916415	NA	NULL	2.96641	2.52794	2.64705	2.18138	3.03902	2.45626	2.48131	2.80511	2.13972	2.80737	2.41623	2.52093	2.39106	2.04167	2.44535	2.71116
12916417	NA	NULL	3.70427	4.74864	4.87806	4.42196	4.10759	4.2133	3.86725	5.1365	3.88291	4.79936	3.77261	4.78677	5.26997	4.65055	4.967	3.65782
12916419	NA	NULL	2.97852	3.1685	2.87573	3.40975	3.9761	2.77979	3.30562	2.41537	2.62076	2.53448	3.77261	2.99653	2.91224	2.69601	2.69952	2.92316
12916421	NA	NULL	1.97248	2.14689	1.51488	1.714	1.67526	1.56408	1.82184	1.71702	1.70017	1.74668	1.82859	1.60047	2.02331	1.99863	1.72244	1.82305
12916423	NA	NULL	2.16154	2.20801	2.07458	2.26116	1.76184	2.3906	2.73398	2.48626	1.80676	2.31269	1.66808	1.80891	2.14758	2.32734	2.444	2.82539
12916425	NA	NULL	3.88956	3.41474	3.76929	3.6829	2.49411	3.21748	2.90472	2.82264	2.69588	3.09142	4.45535	3.76811	3.7969	2.72984	3.10351	4.42026
12916427	NA	NULL	1.71474	1.52933	1.73033	1.85577	1.61248	1.9857	1.82956	1.71158	1.95249	1.49505	2.05625	1.53129	1.56071	1.64524	1.51663	1.46286
12916429	NA	NULL	1.82168	2.60449	1.94987	1.94818	1.81601	1.88648	1.75652	1.70535	1.73683	2.2663	1.72951	1.84463	1.68905	1.96392	1.43375	2.2666
12916431	NA	NULL	2.04624	1.97289	2.4411	2.25461	1.79659	1.90404	1.7452	1.76896	1.88644	2.20789	1.6203	2.21536	2.22852	2.22856	2.7175	2.76704
12916433	NA	NULL	2.06961	1.77138	1.89706	2.03416	1.77192	1.86235	1.72328	2.20093	1.77433	1.70545	2.17689	1.70318	2.06259	2.07716	1.90739	2.56869
12916435	NA	NULL	2.00938	2.41167	2.43431	2.20268	2.73631	2.58189	2.29806	2.41377	2.11086	2.22956	2.44301	2.13866	2.32245	2.48593	2.96489	2.89572
12916437	NA	NULL	1.81299	2.1163	1.78415	1.80453	1.84603	2.25086	2.13978	1.90083	1.83427	2.15202	2.12639	1.87786	1.94145	2.06061	1.76513	1.76029
12916439	NA	NULL	3.81995	3.25975	8.28636	8.21819	2.79569	2.07473	3.59678	2.50774	5.07399	3.08397	6.01856	7.73393	7.39014	7.95053	7.5823	8.25068
12916441	NA	NULL	2.84336	2.76239	3.75521	3.19915	3.58357	2.93131	2.99695	2.63107	2.90034	2.70611	3.55677	3.47957	4.66633	5.06875	4.57847	4.48195
12916443	NA	NULL	3.77099	4.78881	4.12108	3.9838	3.73502	3.20097	4.68783	4.595	3.64232	4.78137	5.84918	3.69876	3.59019	3.09451	4.33472	3.97223
12916445	NA	NULL	3.31866	3.44603	3.03575	3.90194	3.24644	3.74711	3.73376	3.25993	3.71712	3.91272	3.30061	3.54226	5.20257	4.08523	5.08609	5.07642
12916447	NA	NULL	1.59386	1.85664	1.78418	1.74168	1.62772	1.83195	2.06736	2.33507	2.01274	2.01387	1.76153	1.64122	1.72432	2.0172	2.14452	2.00816
12916449	NA	NULL	3.02604	3.49146	2.35769	3.93931	4.79978	3.77233	4.6334	3.15681	3.97829	4.04302	2.57235	4.3971	2.21764	3.90397	4.36523	1.81467
12916451	NA	NULL	5.23756	5.91402	7.30129	7.43337	5.2723	5.91964	6.2501	5.94967	5.1067	5.92946	6.46364	6.46901	6.14497	6.7657	6.77955	6.58007
12916453	NA	NULL	4.58908	4.02567	6.05004	5.38478	3.30292	3.85508	4.95554	4.76735	3.0766	3.36683	4.04539	5.31296	5.88834	6.10523	4.88903	5.38556
12916455	NA	NULL	2.59173	2.93504	5.05546	3.82757	3.35093	2.90954	3.91315	3.73524	3.40956	3.95054	1.81531	2.96881	4.36369	3.40464	3.56176	3.69381
12916457	NA	NULL	2.75501	3.83622	3.6799	4.82831	2.21204	2.90536	3.04805	3.90559	2.8332	3.69049	3.26377	3.35783	5.1446	5.46189	5.47811	6.93642
12916459	NA	NULL	9.29359	9.86106	10.6711	10.841	8.48757	8.4383	9.68096	9.17694	8.24642	9.25737	10.1318	10.3137	10.4788	10.58	10.4387	10.4419
12916461	NA	NULL	2.47331	1.73505	1.93157	1.99175	2.42013	1.83799	2.17394	2.01616	2.17825	2.67297	1.71216	2.48454	2.1357	2.141	2.19554	2.16606
12916463	NA	NULL	2.54144	2.21873	1.63253	1.682	2.06293	2.09277	2.06897	2.43728	2.14839	2.17076	1.82265	1.82519	2.18675	2.32275	1.80071	2.22421
12916465	NA	NULL	4.62925	4.80095	3.65823	3.44174	4.84075	4.79396	5.23858	4.73752	4.42629	4.68792	2.92546	3.81358	3.68085	3.80361	3.61966	4.74316
12916467	NA	NULL	2.43601	3.5983	2.27506	2.06659	2.98352	3.00723	3.68505	2.35846	2.5693	2.35453	2.52051	3.34309	2.87331	2.29597	1.97935	3.31054
12916469	NA	NULL	3.7005	3.6605	4.51076	3.65727	3.97669	3.05829	3.77327	3.33558	2.9541	2.91284	4.02212	4.1119	2.81161	4.25157	3.31476	3.57688
12916471	NA	NULL	2.42902	3.37067	1.65299	1.61254	1.57467	2.10308	2.44408	2.43087	2.6627	3.70025	1.53043	1.76409	1.89784	1.94606	2.16258	2.31979
12916473	NA	NULL	2.48162	2.42602	1.97981	2.14666	2.14588	2.63286	2.50451	2.47979	2.01168	2.1885	2.01551	2.06193	2.6588	2.77365	2.41919	2.52561
12916475	NA	NULL	5.31251	4.34195	6.67882	6.94867	4.53286	5.03959	4.39371	4.35195	5.07826	4.71396	4.19466	6.03458	7.3647	7.20011	7.20716	7.55342
12916477	NA	NULL	2.08168	2.627	2.14548	3.50717	4.34093	2.84861	3.24697	3.31614	2.51777	3.0766	3.45937	2.88954	2.54904	2.0474	1.83136	3.07772
12916479	NA	NULL	6.20525	6.68686	7.16345	7.45107	6.17259	6.25304	6.43607	6.43816	6.01536	6.39292	7.28108	7.33783	7.40732	7.39285	7.69773	7.79515
12916481	NA	NULL	4.09883	3.84904	3.76924	4.11694	3.70868	4.00421	3.09445	3.80886	4.14819	3.14833	3.96646	4.23803	3.67826	4.82094	4.0857	4.13757
12916483	NA	NULL	5.44496	5.13349	5.66533	5.83117	5.12872	5.04515	5.06175	5.52806	5.3653	5.54953	5.97978	5.33039	6.52198	6.10446	6.23928	6.53545
12916485	NA	NULL	3.03305	3.19539	2.71934	2.71028	2.41003	3.07295	3.01656	2.95277	3.43011	3.46087	3.19425	4.2565	2.93877	2.43712	2.89717	2.5141
12916487	NA	NULL	4.75162	4.28843	2.40495	2.59121	3.03412	3.70972	3.19956	4.94639	4.07947	5.1979	3.32682	3.16659	4.12067	4.46591	4.01556	4.33836
12916489	NA	NULL	3.00285	3.56726	2.89962	2.23738	2.84721	2.48028	2.97773	3.27795	2.71942	3.82421	3.03179	3.51441	3.60158	2.40017	2.59573	2.95139
12916491	NA	NULL	4.54051	5.61335	6.16801	6.14237	4.37951	5.16244	5.03732	5.00565	4.58592	5.44275	5.08188	6.15366	4.45398	4.76073	4.70427	5.30597
12916493	NA	NULL	2.71707	2.25382	1.74697	2.07838	1.99697	2.91758	3.07295	2.29507	2.58441	2.35967	2.15381	2.79224	2.37012	2.57189	1.93151	2.34223
12916495	NA	NULL	4.28859	5.23113	6.4908	6.63383	3.92397	4.595	4.97729	4.07196	5.10817	4.33603	5.43182	5.76566	6.62226	6.30188	6.37697	6.84824
12916497	NA	NULL	2.43046	2.5141	4.05146	4.16396	1.98383	2.97351	3.1373	2.97766	3.15681	2.74994	2.93995	2.72751	2.42167	3.66218	3.0379	3.57545
12916499	NA	NULL	2.91582	3.51192	3.70575	3.45027	2.53221	2.8126	3.21013	2.22509	3.32086	2.92593	3.08318	4.11869	3.59326	3.16659	3.16943	3.34043
12916501	NA	NULL	1.95126	2.03259	2.29239	2.18065	2.36616	2.43576	2.25802	2.55837	2.46579	2.62339	1.71098	2.11415	1.92915	2.49919	2.16808	2.38757
12916503	NA	NULL	4.96522	5.86556	5.4407	5.36994	4.5788	4.96944	5.26645	5.48408	4.87952	6.03185	5.92604	5.73049	5.03216	5.28987	5.08307	3.96184
12916505	NA	NULL	2.99926	3.14989	2.9001	3.13325	3.29186	3.10782	2.925	3.94889	3.57906	4.07995	3.5452	3.0776	2.58363	2.64308	3.11667	2.97383
12916507	NA	NULL	3.09628	3.61169	3.77704	2.03281	2.59341	2.66478	2.66629	2.89532	2.74528	3.25094	2.12149	2.39542	2.91245	2.69766	2.60196	3.34862
12916509	NA	NULL	4.4732	4.25645	4.98312	4.75135	4.18923	3.86915	4.13847	4.40213	4.11223	4.52149	4.52504	4.7943	4.9118	5.15375	4.95624	4.75777
12916511	NA	NULL	4.01802	3.61364	2.87469	2.88431	3.57493	3.02326	2.95632	3.17624	4.0006	3.76179	3.78166	3.8644	3.56055	3.58976	3.38645	3.2551
12916513	NA	NULL	2.7446	2.50178	2.89273	2.58255	2.23381	3.3107	3.21136	2.71168	3.38982	3.98789	2.70557	3.46893	4.25362	3.80224	4.35603	3.89391
12916515	NA	NULL	4.03003	3.32174	3.66374	4.19895	3.10694	3.72435	2.53905	2.93192	3.81395	2.85735	4.21508	3.43826	3.97864	3.40482	4.02035	4.09454
12916517	NA	NULL	3.92201	3.38568	4.80866	4.54906	3.03594	2.95839	3.27805	3.64142	4.03294	4.23302	3.34781	4.01556	4.86824	4.22019	4.55392	4.20425
12916519	NA	NULL	2.21882	2.15747	2.58719	1.82594	2.25489	2.1904	2.16337	2.81799	1.87231	2.32772	2.06122	1.74057	2.16866	2.50609	2.77477	2.8817
12916521	NA	NULL	4.36533	4.23755	5.04664	5.58264	4.27465	3.63188	3.12814	4.43872	4.29569	3.21674	5.69464	4.95929	3.64364	4.41274	3.53674	3.95001
12916523	NA	NULL	3.11634	2.48414	2.83287	2.71242	2.45376	2.02034	2.82954	2.21051	2.29375	2.32706	2.07078	2.60863	3.40343	3.30133	2.72257	2.52657
12916525	NA	NULL	2.19696	2.18171	1.78193	1.94494	1.82396	1.87865	2.21354	2.30966	2.00923	2.94858	1.68474	2.17173	1.93624	1.8639	1.61366	1.90476
12916527	NA	NULL	3.59685	4.26414	5.0501	4.68626	4.39352	3.11571	5.05299	4.46694	4.18346	3.98725	5.37349	4.76102	5.02523	5.47286	5.16597	6.29232
12916529	NA	NULL	5.28168	5.22328	5.63303	6.70408	5.17283	4.97652	5.69338	5.15201	5.32987	5.47047	7.1611	6.43784	6.25245	5.60766	6.12601	5.61154
12916531	NA	NULL	5.52255	5.7145	6.23133	6.60123	4.34579	4.86125	5.75059	6.17268	5.12948	5.82886	6.96459	6.68995	6.81603	5.83646	6.13606	6.12599
12916533	NA	NULL	2.77689	2.76036	3.24153	2.61792	2.64378	2.69666	2.65652	2.08674	3.18351	2.38187	2.67266	2.08867	2.54391	2.70163	2.49619	2.90272
12916535	NA	NULL	2.26925	3.47053	4.25777	3.10621	2.93681	2.55678	2.37633	2.4849	2.32666	3.0514	3.49762	3.83331	2.83139	2.591	3.34369	2.39367
12916537	NA	NULL	4.69482	4.42569	5.52343	6.20495	3.17256	3.72744	4.71477	4.65613	4.39086	4.91381	6.46373	5.36968	4.77929	3.55718	3.98705	4.74551
12916539	NA	NULL	2.14852	2.58835	2.62072	1.84805	3.38238	2.4714	2.87772	2.65534	2.62038	2.49391	2.10662	2.59535	2.141	2.93394	2.03067	1.77849
12916541	NA	NULL	3.38233	2.47252	2.20977	2.49747	1.91286	2.30486	2.79536	2.15794	2.62526	2.59898	3.29281	2.47998	2.71293	2.60478	2.58269	3.58586
12916543	NA	NULL	1.79449	1.93332	1.72925	1.62787	1.67825	1.8487	1.64993	1.62412	1.77956	1.60417	1.56382	1.57447	1.62375	1.65951	1.61938	1.90082
12916545	NA	NULL	2.79674	2.66982	3.9208	4.11436	3.40526	2.04723	2.8903	2.31241	2.76616	2.98431	3.87921	3.86386	3.40346	2.66486	2.78771	2.62021
12916547	NA	NULL	4.45566	4.76687	4.53151	5.6959	5.07025	5.07465	4.27569	4.90327	4.60471	4.37823	3.86432	5.34007	4.84835	5.04418	5.35784	5.02457
12916549	NA	NULL	1.84986	2.03102	2.15468	1.88121	1.95866	2.28927	1.81936	1.81683	1.97279	2.14973	1.59532	1.90689	2.45738	1.68114	2.63742	1.93156
12916551	NA	NULL	1.61183	1.47416	1.47723	1.45808	1.46195	1.40135	1.53443	1.44834	1.36435	1.42078	1.34902	1.44163	1.49006	1.58181	1.39198	1.61254
12916553	NA	NULL	2.22113	2.29853	2.75249	2.57573	2.53108	2.40217	2.56027	2.15503	2.48172	2.20796	2.23342	2.61488	2.83371	2.83157	2.76706	2.55188
12916555	NA	NULL	2.44903	2.18977	2.11273	1.94148	1.74693	1.7594	3.64955	2.44016	2.32254	2.17579	2.10905	1.91456	4.03806	4.07241	2.27466	4.34595
12916557	NA	NULL	3.09721	3.67578	3.44104	3.6897	3.11715	3.23706	4.57327	3.48971	2.57349	3.53302	3.25258	4.30348	4.24229	3.53937	3.69942	3.4911
12916559	NA	NULL	4.36125	5.61572	4.32403	4.37137	5.14332	5.22087	5.61804	5.13343	4.0326	5.70457	3.49814	4.25737	5.633	5.36847	4.94399	5.34147
12916561	NA	NULL	4.43334	5.70115	3.95654	4.99474	4.97955	5.5727	6.02792	5.60289	4.8299	5.98503	3.51912	4.47248	5.10791	5.19441	4.96664	4.50518
12916563	NA	NULL	3.65175	3.65967	4.08384	3.52032	2.91194	3.35633	4.54313	3.36227	2.82186	3.7279	4.63885	3.88987	2.93602	3.35028	3.5193	2.6018
12916565	NA	NULL	4.94686	4.48603	5.11215	4.96699	4.70276	3.84754	5.64922	4.69166	3.89924	4.56754	4.78554	5.26033	4.40325	3.74526	3.7319	3.335
12916567	NA	NULL	3.53595	4.17799	4.33825	4.97229	4.33679	4.79668	4.50032	4.5081	3.77287	4.3055	3.74912	4.52951	4.22291	4.77598	4.16877	5.13593
12916569	NA	NULL	3.63855	2.77029	6.44147	6.59997	2.78569	3.26449	5.27267	3.58211	2.72816	2.89298	5.6298	5.76802	3.2145	3.40779	3.0969	2.93455
12916571	NA	NULL	2.86418	2.9861	3.44912	3.08809	2.58609	3.32653	3.94131	2.85025	2.5074	2.71833	3.76807	2.69145	2.69239	3.125	2.44951	2.45457
12916573	NA	NULL	1.81299	2.1163	1.78415	1.80453	1.84603	2.25086	2.13978	1.90083	1.83427	2.15202	2.12639	1.87786	1.94145	2.06061	1.76513	1.76029
12916575	NA	NULL	3.81995	3.25975	8.28636	8.21819	2.79569	2.07473	3.59678	2.50774	5.07399	3.08397	6.01856	7.73393	7.39014	7.95053	7.5823	8.25068
12916577	NA	NULL	2.84336	2.76239	3.75521	3.19915	3.58357	2.93131	2.99695	2.63107	2.90034	2.70611	3.55677	3.47957	4.66633	5.06875	4.57847	4.48195
12916579	NA	NULL	3.77099	4.78881	4.12108	3.9838	3.73502	3.20097	4.68783	4.595	3.64232	4.78137	5.84918	3.69876	3.59019	3.09451	4.33472	3.97223
12916581	NA	NULL	3.31866	3.44603	3.03575	3.90194	3.24644	3.74711	3.73376	3.25993	3.71712	3.91272	3.30061	3.54226	5.20257	4.08523	5.08609	5.07642
12916583	NA	NULL	2.357	3.00574	2.27827	2.08461	2.31487	1.61358	2.14471	1.89305	1.97153	2.88819	2.49591	1.91212	2.6742	2.20688	1.93201	2.23912
12916585	NA	NULL	5.42729	5.73078	3.57	3.98352	4.97908	3.87284	5.07093	5.56194	5.06207	5.56191	3.92704	5.00309	5.4071	5.25308	4.4281	3.94381
12916587	NA	NULL	3.21692	4.06176	3.45196	3.09229	3.27157	3.87479	3.43522	4.30717	3.30692	3.8108	3.11585	3.28872	3.6333	3.83775	3.71135	3.16866
12916589	NA	NULL	4.14944	4.34986	4.27849	3.55381	3.68992	3.69717	3.43769	3.87955	4.82102	4.40269	3.41935	3.68035	3.56113	4.51879	3.55927	4.3466
12916591	NA	NULL	2.93775	3.47616	1.99766	2.17408	3.52151	3.48672	2.99599	3.19794	2.32917	2.76941	2.29433	2.4661	2.62984	2.85855	1.81889	2.80961
12916593	NA	NULL	3.30684	3.80944	2.82227	1.95848	3.77776	3.92289	3.01269	4.43883	3.31118	4.68405	2.78941	2.7565	3.64216	3.51251	3.30298	4.21249
12916595	NA	NULL	3.72144	3.49688	4.29876	4.58912	3.5948	3.53166	3.96815	4.86709	4.20305	3.8675	4.13803	4.66965	5.34675	4.94738	4.48492	4.65558
12916597	NA	NULL	3.43819	4.06603	4.9025	3.93139	3.86094	3.25321	3.69515	3.9629	4.11904	3.98915	3.92862	4.20057	3.89016	3.5812	3.42928	4.71577
12916599	NA	NULL	3.43794	4.22227	5.02801	4.48808	3.9264	4.92414	3.976	5.20431	4.39814	5.13049	4.44256	5.04097	5.54322	5.72999	5.06913	5.04097
12916601	NA	NULL	3.011	2.52682	3.27092	2.68713	2.92102	1.67825	3.18143	2.21764	2.57975	2.89294	2.32021	2.28192	3.52925	2.35608	2.74582	3.15744
12916603	NA	NULL	4.25533	5.33299	6.4621	6.6209	4.44852	4.44724	4.84042	4.20452	4.81668	4.75002	5.20513	6.07783	6.86312	6.7691	6.45769	6.25464
12916605	NA	NULL	1.7568	1.75611	1.51757	1.8171	1.56613	1.76118	1.50899	1.65293	1.74286	1.59133	2.02999	1.53628	2.02911	1.97766	1.95013	1.65299
12916607	NA	NULL	1.68506	2.17118	2.3316	2.08859	1.89	1.78791	2.16494	2.35413	2.11286	1.7064	2.3154	2.07406	3.46384	2.41763	2.05303	2.10764
12916609	NA	NULL	1.95913	3.25085	3.18586	4.03188	1.74456	2.27959	3.19567	3.2246	2.22537	3.79835	1.86148	3.14747	3.87737	2.61832	4.14808	4.03069
12916611	NA	NULL	2.42349	3.55223	3.5043	2.03187	3.44206	3.14078	2.85789	3.65555	2.13095	3.03686	2.25295	2.24851	3.00682	3.3743	2.73248	2.95581
12916613	NA	NULL	1.64148	1.80025	1.80762	2.12535	1.7918	1.57952	1.69022	2.147	1.52799	1.53873	2.4698	1.79754	1.72892	1.82912	1.65352	1.88116
12916615	NA	NULL	1.55185	1.81846	1.56385	1.46861	1.48268	1.49031	2.72234	2.1142	1.49006	1.39126	1.61882	1.46642	1.65064	1.62787	1.38708	1.83235
12916617	NA	NULL	1.90895	1.75743	2.44646	2.63411	3.08833	2.41978	1.97752	2.05551	1.76698	2.26998	2.09564	2.8108	3.20703	2.73918	2.54265	2.68062
12916619	NA	NULL	3.26576	3.30896	3.44321	4.24146	3.2413	3.34678	4.27534	3.6841	2.96691	3.28782	5.24887	3.85861	3.12829	3.03818	3.02795	2.98431
12916621	NA	NULL	5.11024	5.01283	7.22908	6.96521	4.41585	4.166	4.76733	4.82482	4.16066	5.08643	5.41234	5.82028	6.0552	5.93359	5.20875	6.12152
12916623	NA	NULL	2.18377	2.59443	2.01137	1.78621	1.92524	2.27278	4.14647	3.03626	2.39941	2.31998	1.60788	1.95843	2.43729	2.11055	2.01165	2.8695
12916625	NA	NULL	2.91366	3.04165	2.56167	2.11497	2.79962	3.18643	3.16479	3.0512	2.59963	3.52852	2.76041	2.2056	2.57645	3.18088	3.35604	3.1782
12916627	NA	NULL	2.56547	2.61043	2.73845	2.58242	2.62212	2.22471	3.60184	3.51509	2.65433	2.44036	2.13615	2.5274	3.58236	3.48146	2.95649	2.83887
12916629	NA	NULL	2.12945	1.56137	2.49018	3.33556	1.92477	1.65326	1.96456	1.81963	1.96025	1.99128	2.49898	2.93799	1.66107	1.85554	1.91782	2.14799
12916631	NA	NULL	2.6048	2.74731	3.05712	3.05903	2.73044	2.59856	2.61386	3.59883	2.3476	2.9479	2.78162	3.05881	3.33339	3.45644	3.39613	2.90388
12916633	NA	NULL	1.99028	2.27055	3.85974	2.43047	2.4413	2.29097	2.55459	1.72692	2.10209	2.07492	2.53001	2.4471	2.59348	2.40995	3.623	2.77408
12916635	NA	NULL	3.6679	2.37077	3.51413	5.0632	2.44522	2.38567	3.00034	2.71429	3.5881	2.41767	5.16884	3.83936	2.30083	3.00706	2.22634	3.03814
12916637	NA	NULL	5.17423	4.84824	5.90079	6.8822	5.45623	5.49479	5.5529	4.32217	5.40523	5.35985	6.38556	6.00277	5.93038	5.54782	4.92576	5.72522
12916639	NA	NULL	4.52299	5.1652	5.9739	5.66236	4.20296	4.48196	4.80427	4.11664	4.83485	4.69264	5.43195	4.81731	5.81174	5.10564	5.22158	5.87239
12916641	NA	NULL	1.85163	2.01626	2.23562	1.91032	1.63344	1.79072	1.90951	1.68911	1.70017	1.79131	1.57136	1.98982	1.89393	2.70626	2.10577	2.57435
12916643	NA	NULL	1.76327	1.72812	1.57851	2.05963	1.8212	1.86664	1.83787	1.70482	1.63252	1.69004	2.08813	2.11956	1.90815	1.49891	1.65006	1.69917
12916645	NA	NULL	5.51317	5.10792	6.91637	5.67476	5.12627	4.6939	5.21276	5.12092	5.24132	4.61987	6.29196	6.25621	6.19914	6.51247	6.70616	5.88922
12916647	NA	NULL	2.59361	2.75577	4.0811	3.32173	1.95632	2.54753	3.05564	2.87981	2.75772	2.62289	3.68312	4.05438	6.06464	4.92689	4.52228	5.25703
12916649	NA	NULL	4.55072	5.16265	6.51607	6.33061	4.83063	4.40409	4.55482	4.93125	4.8537	4.99125	6.13566	5.53222	5.62076	5.82232	5.35569	6.14703
12916651	NA	NULL	1.8455	1.84372	2.16759	1.76529	1.86468	1.75412	1.72328	1.79837	1.80412	1.83142	1.76202	1.87854	2.06618	2.02057	1.87746	1.84911
12916653	NA	NULL	2.65958	2.32203	4.93092	3.86864	1.79013	2.13873	2.63415	2.4283	2.15823	1.80121	3.15594	3.44228	2.87301	2.79636	2.97618	2.60304
12916655	NA	NULL	1.59386	1.85664	1.78418	1.74168	1.62772	1.83195	2.06736	2.33507	2.01274	2.01387	1.76153	1.64122	1.72432	2.0172	2.14452	2.00816
12916657	NA	NULL	3.02604	3.49146	2.35769	3.93931	4.79978	3.77233	4.6334	3.15681	3.97829	4.04302	2.57235	4.3971	2.21764	3.90397	4.36523	1.81467
12916659	NA	NULL	5.23756	5.91402	7.30129	7.43337	5.2723	5.91964	6.2501	5.94967	5.1067	5.92946	6.46364	6.46901	6.14497	6.7657	6.77955	6.58007
12916661	NA	NULL	4.58908	4.02567	6.05004	5.38478	3.30292	3.85508	4.95554	4.76735	3.0766	3.36683	4.04539	5.31296	5.88834	6.10523	4.88903	5.38556
12916663	NA	NULL	2.59173	2.93504	5.05546	3.82757	3.35093	2.90954	3.91315	3.73524	3.40956	3.95054	1.81531	2.96881	4.36369	3.40464	3.56176	3.69381
12916665	NA	NULL	2.75501	3.83622	3.6799	4.82831	2.21204	2.90536	3.04805	3.90559	2.8332	3.69049	3.26377	3.35783	5.1446	5.46189	5.47811	6.93642
12916667	NA	NULL	9.29359	9.86106	10.6711	10.841	8.48757	8.4383	9.68096	9.17694	8.24642	9.25737	10.1318	10.3137	10.4788	10.58	10.4387	10.4419
12916669	NA	NULL	2.47331	1.73505	1.93157	1.99175	2.42013	1.83799	2.17394	2.01616	2.17825	2.67297	1.71216	2.48454	2.1357	2.141	2.19554	2.16606
12916671	NA	NULL	2.54144	2.21873	1.63253	1.682	2.06293	2.09277	2.06897	2.43728	2.14839	2.17076	1.82265	1.82519	2.18675	2.32275	1.80071	2.22421
12916673	NA	NULL	4.62925	4.80095	3.65823	3.44174	4.84075	4.79396	5.23858	4.73752	4.42629	4.68792	2.92546	3.81358	3.68085	3.80361	3.61966	4.74316
12916675	NA	NULL	2.43601	3.5983	2.27506	2.06659	2.98352	3.00723	3.68505	2.35846	2.5693	2.35453	2.52051	3.34309	2.87331	2.29597	1.97935	3.31054
12916677	NA	NULL	3.7005	3.6605	4.51076	3.65727	3.97669	3.05829	3.77327	3.33558	2.9541	2.91284	4.02212	4.1119	2.81161	4.25157	3.31476	3.57688
12916679	NA	NULL	2.42902	3.37067	1.65299	1.61254	1.57467	2.10308	2.44408	2.43087	2.6627	3.70025	1.53043	1.76409	1.89784	1.94606	2.16258	2.31979
12916681	NA	NULL	2.48162	2.42602	1.97981	2.14666	2.14588	2.63286	2.50451	2.47979	2.01168	2.1885	2.01551	2.06193	2.6588	2.77365	2.41919	2.52561
12916683	NA	NULL	5.31251	4.34195	6.67882	6.94867	4.53286	5.03959	4.39371	4.35195	5.07826	4.71396	4.19466	6.03458	7.3647	7.20011	7.20716	7.55342
12916685	NA	NULL	2.08168	2.627	2.14548	3.50717	4.34093	2.84861	3.24697	3.31614	2.51777	3.0766	3.45937	2.88954	2.54904	2.0474	1.83136	3.07772
12916687	NA	NULL	6.20525	6.68686	7.16345	7.45107	6.17259	6.25304	6.43607	6.43816	6.01536	6.39292	7.28108	7.33783	7.40732	7.39285	7.69773	7.79515
12916689	NA	NULL	4.09883	3.84904	3.76924	4.11694	3.70868	4.00421	3.09445	3.80886	4.14819	3.14833	3.96646	4.23803	3.67826	4.82094	4.0857	4.13757
12916691	NA	NULL	5.44496	5.13349	5.66533	5.83117	5.12872	5.04515	5.06175	5.52806	5.3653	5.54953	5.97978	5.33039	6.52198	6.10446	6.23928	6.53545
12916693	NA	NULL	3.03305	3.19539	2.71934	2.71028	2.41003	3.07295	3.01656	2.95277	3.43011	3.46087	3.19425	4.2565	2.93877	2.43712	2.89717	2.5141
12916695	NA	NULL	4.75162	4.28843	2.40495	2.59121	3.03412	3.70972	3.19956	4.94639	4.07947	5.1979	3.32682	3.16659	4.12067	4.46591	4.01556	4.33836
12916697	NA	NULL	3.00285	3.56726	2.89962	2.23738	2.84721	2.48028	2.97773	3.27795	2.71942	3.82421	3.03179	3.51441	3.60158	2.40017	2.59573	2.95139
12916699	NA	NULL	4.54051	5.61335	6.16801	6.14237	4.37951	5.16244	5.03732	5.00565	4.58592	5.44275	5.08188	6.15366	4.45398	4.76073	4.70427	5.30597
12916701	NA	NULL	2.71707	2.25382	1.74697	2.07838	1.99697	2.91758	3.07295	2.29507	2.58441	2.35967	2.15381	2.79224	2.37012	2.57189	1.93151	2.34223
12916703	NA	NULL	4.28859	5.23113	6.4908	6.63383	3.92397	4.595	4.97729	4.07196	5.10817	4.33603	5.43182	5.76566	6.62226	6.30188	6.37697	6.84824
12916705	NA	NULL	2.43046	2.5141	4.05146	4.16396	1.98383	2.97351	3.1373	2.97766	3.15681	2.74994	2.93995	2.72751	2.42167	3.66218	3.0379	3.57545
12916707	NA	NULL	2.91582	3.51192	3.70575	3.45027	2.53221	2.8126	3.21013	2.22509	3.32086	2.92593	3.08318	4.11869	3.59326	3.16659	3.16943	3.34043
12916709	NA	NULL	1.95126	2.03259	2.29239	2.18065	2.36616	2.43576	2.25802	2.55837	2.46579	2.62339	1.71098	2.11415	1.92915	2.49919	2.16808	2.38757
12916711	NA	NULL	4.96522	5.86556	5.4407	5.36994	4.5788	4.96944	5.26645	5.48408	4.87952	6.03185	5.92604	5.73049	5.03216	5.28987	5.08307	3.96184
12916713	NA	NULL	2.99926	3.14989	2.9001	3.13325	3.29186	3.10782	2.925	3.94889	3.57906	4.07995	3.5452	3.0776	2.58363	2.64308	3.11667	2.97383
12916715	NA	NULL	3.09628	3.61169	3.77704	2.03281	2.59341	2.66478	2.66629	2.89532	2.74528	3.25094	2.12149	2.39542	2.91245	2.69766	2.60196	3.34862
12916717	NA	NULL	4.4732	4.25645	4.98312	4.75135	4.18923	3.86915	4.13847	4.40213	4.11223	4.52149	4.52504	4.7943	4.9118	5.15375	4.95624	4.75777
12916719	NA	NULL	4.01802	3.61364	2.87469	2.88431	3.57493	3.02326	2.95632	3.17624	4.0006	3.76179	3.78166	3.8644	3.56055	3.58976	3.38645	3.2551
12916721	NA	NULL	2.7446	2.50178	2.89273	2.58255	2.23381	3.3107	3.21136	2.71168	3.38982	3.98789	2.70557	3.46893	4.25362	3.80224	4.35603	3.89391
12916723	NA	NULL	4.03003	3.32174	3.66374	4.19895	3.10694	3.72435	2.53905	2.93192	3.81395	2.85735	4.21508	3.43826	3.97864	3.40482	4.02035	4.09454
12916725	NA	NULL	3.92201	3.38568	4.80866	4.54906	3.03594	2.95839	3.27805	3.64142	4.03294	4.23302	3.34781	4.01556	4.86824	4.22019	4.55392	4.20425
12916727	NA	NULL	2.21882	2.15747	2.58719	1.82594	2.25489	2.1904	2.16337	2.81799	1.87231	2.32772	2.06122	1.74057	2.16866	2.50609	2.77477	2.8817
12916729	NA	NULL	4.36533	4.23755	5.04664	5.58264	4.27465	3.63188	3.12814	4.43872	4.29569	3.21674	5.69464	4.95929	3.64364	4.41274	3.53674	3.95001
12916731	NA	NULL	3.11634	2.48414	2.83287	2.71242	2.45376	2.02034	2.82954	2.21051	2.29375	2.32706	2.07078	2.60863	3.40343	3.30133	2.72257	2.52657
12916733	NA	NULL	2.19696	2.18171	1.78193	1.94494	1.82396	1.87865	2.21354	2.30966	2.00923	2.94858	1.68474	2.17173	1.93624	1.8639	1.61366	1.90476
12916735	NA	NULL	3.59685	4.26414	5.0501	4.68626	4.39352	3.11571	5.05299	4.46694	4.18346	3.98725	5.37349	4.76102	5.02523	5.47286	5.16597	6.29232
12916737	NA	NULL	5.28168	5.22328	5.63303	6.70408	5.17283	4.97652	5.69338	5.15201	5.32987	5.47047	7.1611	6.43784	6.25245	5.60766	6.12601	5.61154
12916739	NA	NULL	5.52255	5.7145	6.23133	6.60123	4.34579	4.86125	5.75059	6.17268	5.12948	5.82886	6.96459	6.68995	6.81603	5.83646	6.13606	6.12599
12916741	NA	NULL	2.77689	2.76036	3.24153	2.61792	2.64378	2.69666	2.65652	2.08674	3.18351	2.38187	2.67266	2.08867	2.54391	2.70163	2.49619	2.90272
12916743	NA	NULL	2.26925	3.47053	4.25777	3.10621	2.93681	2.55678	2.37633	2.4849	2.32666	3.0514	3.49762	3.83331	2.83139	2.591	3.34369	2.39367
12916745	NA	NULL	4.69482	4.42569	5.52343	6.20495	3.17256	3.72744	4.71477	4.65613	4.39086	4.91381	6.46373	5.36968	4.77929	3.55718	3.98705	4.74551
12916747	NA	NULL	2.14852	2.58835	2.62072	1.84805	3.38238	2.4714	2.87772	2.65534	2.62038	2.49391	2.10662	2.59535	2.141	2.93394	2.03067	1.77849
12916749	NA	NULL	3.38233	2.47252	2.20977	2.49747	1.91286	2.30486	2.79536	2.15794	2.62526	2.59898	3.29281	2.47998	2.71293	2.60478	2.58269	3.58586
12916751	NA	NULL	1.79449	1.93332	1.72925	1.62787	1.67825	1.8487	1.64993	1.62412	1.77956	1.60417	1.56382	1.57447	1.62375	1.65951	1.61938	1.90082
12916753	NA	NULL	2.79674	2.66982	3.9208	4.11436	3.40526	2.04723	2.8903	2.31241	2.76616	2.98431	3.87921	3.86386	3.40346	2.66486	2.78771	2.62021
12916755	NA	NULL	3.80424	4.25833	4.17352	6.27429	4.29372	3.99214	3.52965	4.19658	3.16645	4.20775	5.50303	4.8549	6.89883	7.40324	6.49487	7.02745
12916757	NA	NULL	4.38073	4.20968	4.02878	4.23325	3.95973	3.80473	4.09571	3.70214	4.12608	4.28926	3.42145	4.15332	5.70988	5.09085	5.60409	5.41001
12916759	NA	NULL	2.80005	2.94339	2.20028	3.13188	2.81386	3.6067	2.41626	3.07292	3.01736	2.45496	3.70784	3.07943	2.98391	3.16974	3.55417	3.0849
12916761	NA	NULL	2.6843	3.46567	1.94453	1.61645	2.23481	2.10985	2.75	2.8504	1.84975	2.00831	2.71696	2.10645	3.16093	3.57728	2.79389	3.00893
12916763	NA	NULL	2.96641	2.52794	2.64705	2.18138	3.03902	2.45626	2.48131	2.80511	2.13972	2.80737	2.41623	2.52093	2.39106	2.04167	2.44535	2.71116
12916765	NA	NULL	3.70427	4.74864	4.87806	4.42196	4.10759	4.2133	3.86725	5.1365	3.88291	4.79936	3.77261	4.78677	5.26997	4.65055	4.967	3.65782
12916767	NA	NULL	2.97852	3.1685	2.87573	3.40975	3.9761	2.77979	3.30562	2.41537	2.62076	2.53448	3.77261	2.99653	2.91224	2.69601	2.69952	2.92316
12916769	NA	NULL	1.97248	2.14689	1.51488	1.714	1.67526	1.56408	1.82184	1.71702	1.70017	1.74668	1.82859	1.60047	2.02331	1.99863	1.72244	1.82305
12916771	NA	NULL	2.16154	2.20801	2.07458	2.26116	1.76184	2.3906	2.73398	2.48626	1.80676	2.31269	1.66808	1.80891	2.14758	2.32734	2.444	2.82539
12916773	NA	NULL	3.88956	3.41474	3.76929	3.6829	2.49411	3.21748	2.90472	2.82264	2.69588	3.09142	4.45535	3.76811	3.7969	2.72984	3.10351	4.42026
12916775	NA	NULL	1.71474	1.52933	1.73033	1.85577	1.61248	1.9857	1.82956	1.71158	1.95249	1.49505	2.05625	1.53129	1.56071	1.64524	1.51663	1.46286
12916777	NA	NULL	1.82168	2.60449	1.94987	1.94818	1.81601	1.88648	1.75652	1.70535	1.73683	2.2663	1.72951	1.84463	1.68905	1.96392	1.43375	2.2666
12916779	NA	NULL	2.04624	1.97289	2.4411	2.25461	1.79659	1.90404	1.7452	1.76896	1.88644	2.20789	1.6203	2.21536	2.22852	2.22856	2.7175	2.76704
12916781	NA	NULL	2.06961	1.77138	1.89706	2.03416	1.77192	1.86235	1.72328	2.20093	1.77433	1.70545	2.17689	1.70318	2.06259	2.07716	1.90739	2.56869
12916783	NA	NULL	2.00938	2.41167	2.43431	2.20268	2.73631	2.58189	2.29806	2.41377	2.11086	2.22956	2.44301	2.13866	2.32245	2.48593	2.96489	2.89572
12916785	NA	NULL	3.24673	3.25334	3.65986	3.20469	3.27658	3.89352	3.53614	3.27937	2.9902	3.15426	2.12345	3.31154	3.81984	3.21124	4.15387	3.47825
12916787	NA	NULL	2.19608	2.89371	1.78297	2.14127	2.16765	2.82368	2.40771	2.45562	2.16085	2.70463	1.85775	2.09743	2.5701	2.33249	2.62778	2.34298
12916789	NA	NULL	4.22914	4.875	3.64554	3.91623	4.04147	5.04388	4.02864	4.4206	4.37463	4.60393	3.99901	4.01475	4.58749	4.86174	5.14529	5.1835
12916791	NA	NULL	3.6762	4.57295	2.82635	3.22062	4.27955	3.56951	4.08835	4.49433	3.56249	4.4357	3.03397	3.0006	3.71711	4.99238	4.41952	4.07728
12916793	NA	NULL	3.70075	4.05638	2.54376	3.11262	3.74677	3.92795	4.3187	4.21621	3.8218	3.64942	2.9741	3.06598	3.37597	3.4213	3.15691	3.10566
12916795	NA	NULL	6.31312	5.75929	7.67936	7.56345	4.96488	6.26425	6.3647	6.3178	5.82179	5.64494	7.3711	6.58502	6.61768	6.18613	6.59134	6.87649
12916797	NA	NULL	1.98366	2.26322	1.92686	1.91777	1.95992	1.66779	2.38614	2.06776	2.04225	2.21931	2.22448	1.65223	2.18864	2.28454	2.02648	2.35106
12916799	NA	NULL	2.93323	3.34113	3.19605	3.66187	3.55022	2.83277	3.49806	3.16356	3.84794	2.88202	5.24452	3.52276	2.75853	3.6314	2.52289	3.02445
12916801	NA	NULL	2.05711	1.59525	1.55546	1.57695	1.50315	1.40135	1.64781	1.66356	1.85306	1.47257	1.7895	1.56418	1.71079	1.416	1.5756	1.53783
12916803	NA	NULL	2.42797	2.28964	1.93152	2.51833	1.85513	2.29789	1.75929	1.89973	2.33944	2.39431	2.17185	1.97205	2.02301	1.91662	1.90021	2.16679
12916805	NA	NULL	2.66577	2.23584	2.27804	2.77667	2.17621	3.09422	2.38677	2.12127	2.88963	2.29989	2.74373	2.13438	3.24473	2.40575	3.77783	3.75679
12916807	NA	NULL	1.87613	1.68744	1.67492	1.78039	1.62967	1.80005	1.97713	2.14615	1.76752	2.03863	1.64961	1.60545	2.29457	1.84761	1.78413	2.10202
12916809	NA	NULL	3.19319	3.30849	3.75541	2.88781	3.12588	3.15735	3.56453	3.33009	3.81051	3.49275	3.74321	2.9931	3.74251	3.57219	4.68311	4.95274
12916811	NA	NULL	2.23137	1.65694	2.4632	2.13112	2.38459	1.7594	2.05525	1.87104	1.82714	1.84017	1.91569	3.06162	3.28685	3.23273	3.17946	2.9699
12916813	NA	NULL	2.37273	1.9077	2.07748	1.90246	2.22049	1.84013	2.09147	1.73228	1.73832	2.3932	2.3818	1.82427	2.27663	2.38535	2.40722	2.25239
12916815	NA	NULL	2.00774	1.79427	1.81315	1.70624	1.74769	2.21835	2.04188	1.75964	1.77026	1.9945	2.0241	2.03196	3.35133	1.79834	2.53129	2.20995
12916817	NA	NULL	2.15457	2.39403	4.86452	3.0737	3.05257	2.22546	2.33192	2.85068	2.39395	2.79493	3.71023	3.03486	4.02153	3.75355	3.18492	4.41478
12916819	NA	NULL	1.78863	1.86961	1.71783	1.91212	1.75613	1.65732	1.85627	1.72266	2.37487	1.49805	1.85627	2.07406	1.84058	2.73439	1.81461	2.86942
12916821	NA	NULL	2.3072	1.77185	2.71845	1.64475	2.49698	1.55285	1.94381	1.44834	2.42244	2.20076	1.40135	1.53709	2.75853	2.38432	1.63513	2.66209
12916823	NA	NULL	4.74496	5.4832	6.17478	6.07791	4.71528	4.56394	4.60553	5.14357	4.75958	4.97858	5.85082	5.82628	6.73031	6.36528	6.13618	6.57928
12916825	NA	NULL	1.81191	1.67002	1.91672	2.29058	1.83856	1.65804	1.91291	1.84049	1.81191	1.73035	2.19938	2.3845	1.97063	1.65395	2.06738	1.72108
12916827	NA	NULL	3.51716	3.70677	3.36386	3.65466	2.95996	3.67422	4.12689	4.10463	3.5897	3.45622	3.67664	3.41032	3.55612	3.70759	4.06477	4.54013
12916829	NA	NULL	2.57769	2.62239	3.45019	4.53785	2.54429	2.48468	2.80389	1.94606	2.98807	2.43885	2.48243	3.59319	4.49998	4.671	4.02731	4.64207
12916831	NA	NULL	2.31196	2.56748	3.80986	3.53904	3.41286	3.04127	2.6202	2.53639	3.31177	3.14424	3.91971	2.5101	2.71355	2.06261	2.44955	2.34549
12916833	NA	NULL	1.86568	2.07038	1.60538	1.85292	2.31785	1.74096	2.12881	1.80718	2.28822	1.90026	2.00211	1.76245	1.72333	1.92924	1.73042	2.03843
12916835	NA	NULL	1.88358	1.60607	1.76546	1.58236	1.83364	1.62431	1.8496	1.82932	1.98723	2.2331	1.66622	1.47374	1.73894	1.9298	1.69027	2.02144
12916837	NA	NULL	2.48876	2.01811	2.05617	3.05073	2.04481	2.11784	1.76712	2.00034	2.00157	1.9364	2.04159	2.0383	2.29216	3.32532	2.67913	2.1651
12916839	NA	NULL	1.58067	1.75557	2.67256	2.31828	2.19651	1.83532	1.92675	2.62403	1.87144	1.82507	1.94021	2.42917	1.95616	2.38259	1.96334	2.34666
12916841	NA	NULL	5.46654	5.49045	5.72864	5.78726	3.9242	3.47415	6.05731	5.26972	5.94717	5.04914	6.35691	5.27567	4.41741	4.20494	4.81512	5.30172
12916843	NA	NULL	4.19604	3.54771	3.83968	3.45792	3.34386	3.24547	4.32375	3.87256	4.72458	4.38126	3.09392	3.47614	2.52969	3.15811	4.20389	2.67639
12916845	NA	NULL	2.96975	2.82175	2.47266	2.76327	3.08303	3.03411	3.15918	3.41676	2.57907	3.24579	2.55685	2.81049	3.27413	3.98509	3.30674	3.43906
12916847	NA	NULL	5.49198	6.64135	3.89939	3.56144	7.60497	7.30638	6.79573	6.99786	6.12339	7.10143	6.26075	6.21412	6.8181	5.58425	6.45307	5.92865
12916849	NA	NULL	6.14261	7.11292	5.96392	5.51264	7.17916	7.14949	7.59452	6.98844	6.67429	7.26934	5.44847	6.22522	6.22845	6.41534	6.29891	6.78153
12916851	NA	NULL	4.61799	5.65239	4.56184	4.26187	4.59246	5.36825	5.50227	5.09843	5.63711	5.48189	4.58192	6.09335	5.30974	4.85084	3.96209	3.93597
12916853	NA	NULL	6.13425	6.12435	4.8482	5.1782	6.20952	6.53498	7.45363	6.20632	5.99407	6.45336	3.65379	5.42389	6.4089	6.29979	6.06535	6.22207
12916855	NA	NULL	1.63847	1.77023	1.69489	2.45891	2.00764	1.93088	1.64371	1.89987	2.06802	2.08214	1.84329	1.60032	1.81919	1.85882	1.70239	2.01564
12916857	NA	NULL	1.82082	2.28298	2.54293	3.73479	2.39361	2.05578	1.72376	2.56732	2.44318	1.99474	2.28222	2.5486	2.90146	2.43737	3.03265	2.99156
12916859	NA	NULL	2.37541	1.81232	2.95763	2.33251	2.39603	2.09219	3.73392	2.06669	2.06068	2.99182	2.09631	2.1897	3.01744	2.22147	2.31238	2.23912
12916861	NA	NULL	1.99348	1.88216	2.28528	2.70196	2.14971	2.43651	2.60431	2.09273	2.18917	2.07701	1.95461	1.83468	2.07467	2.54255	2.02331	1.9855
12916863	NA	NULL	2.90247	3.39743	2.52733	2.00157	2.89727	2.57968	2.75825	2.80108	2.642	3.08212	2.60522	2.73214	2.56697	3.51836	2.69252	2.65959
12916865	NA	NULL	1.57994	1.95429	1.70417	1.52967	1.70129	1.83255	1.78709	1.76474	1.73259	2.10317	1.45766	1.5947	2.16761	2.20576	1.82004	1.67387
12916867	NA	NULL	1.82172	2.44778	2.23307	2.22114	1.95857	2.00529	2.76911	2.30165	1.73025	2.41508	2.23694	2.43719	1.75855	2.57625	1.82947	2.10297
12916869	NA	NULL	2.717	2.16603	1.73987	1.77465	2.7125	2.16713	1.99594	1.69078	2.14746	1.93924	1.78338	2.02749	1.61214	2.45893	1.98211	2.1532
12916871	NA	NULL	2.62606	3.24628	2.25147	2.49749	3.27808	2.6381	3.94041	3.41344	2.64039	3.09156	2.40937	2.06276	2.89447	2.94087	2.67074	3.02408
12916873	NA	NULL	1.50744	1.78256	1.60267	1.81206	1.79602	1.62355	1.67639	1.968	1.54184	1.98304	1.56511	1.48898	2.01734	1.88732	2.65571	2.30786
12916875	NA	NULL	2.20307	3.0588	2.44645	2.43098	3.15953	2.17092	3.45142	2.74333	2.75444	2.68532	2.54955	2.36531	2.64446	2.14888	2.46955	2.45298
12916877	NA	NULL	2.67567	2.52692	2.3517	2.49572	2.38642	3.67679	4.39685	3.55367	1.72933	2.68188	2.45834	2.76921	3.85091	3.22507	3.06804	4.45089
12916879	NA	NULL	2.18006	2.25981	1.7933	1.8483	1.97921	2.09116	2.44611	2.03007	2.30566	1.79018	1.76574	1.65404	2.79547	2.51002	2.93639	2.03573
12916881	NA	NULL	5.48381	6.04988	6.22095	6.47811	5.79882	5.8708	5.4032	5.98039	5.16039	6.12925	5.93278	6.23294	6.78311	6.68011	7.13769	6.59371
12916883	NA	NULL	3.66164	3.3089	3.95923	3.47372	3.79988	3.63311	3.52011	3.98161	3.92661	2.94277	3.02559	3.30722	4.48582	4.87956	4.31884	3.90676
12916885	NA	NULL	2.28516	2.82092	2.18121	1.91539	2.156	2.26031	2.95945	3.18348	2.35657	2.34871	2.57448	2.04657	2.0014	2.9698	2.5737	2.1815
12916887	NA	NULL	1.7241	1.74445	1.71138	1.77763	1.6255	1.56274	1.74877	1.76718	1.54562	1.65343	1.70335	1.82096	1.63981	1.9985	2.05574	1.86497
12916889	NA	NULL	1.95657	2.16681	2.18718	2.01379	1.85678	1.62199	2.24707	2.01685	1.68245	2.76945	2.41306	2.36319	2.44618	2.02534	2.34654	2.1066
12916891	NA	NULL	3.02536	3.64768	2.02047	2.46414	2.15381	1.96039	3.39519	2.64172	2.84507	2.7909	1.83316	1.97378	3.27301	3.63197	3.04024	2.98283
12916893	NA	NULL	2.9301	3.79074	1.67542	1.9488	3.1618	2.28655	3.34418	2.80904	1.68592	2.44545	1.68448	1.84284	2.72301	2.8731	1.96047	2.83852
12916895	NA	NULL	5.8099	5.30573	6.00393	4.94274	4.07949	4.79477	4.39458	4.01245	4.21051	4.3486	4.87133	4.39271	6.148	6.25969	6.29027	6.78218
12916897	NA	NULL	5.62604	6.04027	5.75411	4.79669	5.12132	5.84692	5.49186	5.57566	5.02858	5.64196	5.87895	5.40355	5.2434	4.56433	5.93783	5.18747
12916899	NA	NULL	3.43049	4.03284	2.39015	2.81336	3.37578	2.6905	3.46897	4.32571	2.77822	3.54491	1.92153	2.46134	3.01118	2.95328	2.86	2.51077
12916901	NA	NULL	4.01645	4.40985	5.15654	5.03195	4.49858	4.92019	4.63957	4.0931	4.46697	4.04011	5.56654	5.30078	4.69324	6.06567	4.84725	5.57372
12916903	NA	NULL	5.03366	6.15084	5.0014	4.79844	5.85194	5.27259	5.49622	5.90373	4.9869	5.27575	6.17888	4.86751	5.48454	4.69955	4.2441	4.72361
12916905	NA	NULL	5.78291	6.7873	5.11071	5.01797	6.67079	6.53031	6.60012	7.08101	5.47552	6.06744	5.37062	5.89019	7.0544	5.66053	6.47809	5.02824
12916907	NA	NULL	5.23162	6.33675	4.92716	4.27751	4.77883	5.12439	5.37067	6.48128	4.42338	5.12878	2.92855	4.30156	5.38077	5.40772	5.91873	5.44982
12916909	NA	NULL	3.99101	5.35803	4.11455	4.02715	3.78523	3.5651	3.76029	4.93552	3.52279	4.71661	3.43144	4.02206	4.48263	4.54078	4.52963	4.63155
12916911	NA	NULL	5.97592	6.31102	5.91847	6.12014	5.7428	5.69533	5.50541	5.92437	5.15744	6.05697	5.79639	5.80023	5.50654	6.09465	5.52386	6.92972
12916913	NA	NULL	3.45897	3.44007	5.99929	6.91337	3.60207	3.66843	3.79334	4.56048	3.33978	3.44652	6.25318	5.32257	6.18069	5.58459	5.86252	6.0294
12916915	NA	NULL	4.19521	3.55341	5.18405	5.40413	3.32456	3.47259	3.38953	3.47521	3.33945	3.53731	4.24557	4.72646	4.15946	4.86559	4.83149	5.02486
12916917	NA	NULL	1.91641	2.09279	1.51604	1.72175	1.73821	1.73027	2.03434	1.89929	1.79299	1.56534	1.86967	1.57718	2.03494	1.97265	1.94175	2.13939
12916919	NA	NULL	4.65183	4.87608	4.58414	4.14273	4.36857	4.2652	4.5574	4.85817	3.5858	4.3558	3.05048	3.46419	3.58385	5.09649	4.22862	3.53189
12916921	NA	NULL	5.93518	6.66388	6.3321	5.01877	4.21541	4.90399	5.77585	6.30503	4.71979	5.9366	3.71452	5.45233	4.96697	5.50227	4.78162	6.55274
12916923	NA	NULL	2.43562	3.02572	1.89175	2.06337	2.27757	2.3648	2.14388	2.54587	2.16308	2.36118	1.98968	2.36478	2.5538	2.11885	2.52795	2.43712
12916925	NA	NULL	6.10721	7.02099	4.88758	4.97908	4.94555	4.74373	6.52132	5.60694	4.84983	5.76068	5.62376	4.72502	5.33156	5.56309	6.0346	6.1531
12916927	NA	NULL	4.21034	3.21106	3.50057	2.7577	3.12576	3.15227	3.00539	4.16416	2.72545	3.00451	2.84234	2.93785	3.53298	4.36376	4.45831	5.37094
12916929	NA	NULL	2.60921	2.63174	2.26269	3.05222	2.19212	2.3848	2.58617	2.5068	3.05583	2.35769	2.61424	2.79769	3.27898	2.34419	2.41017	1.81048
12916931	NA	NULL	2.64895	2.72585	2.73947	2.55073	2.28368	2.56466	2.30285	2.96728	2.51661	2.25772	2.30817	2.47225	3.07573	3.16387	3.14365	2.88535
12916933	NA	NULL	1.8715	1.73132	1.5078	1.65251	1.68832	1.66827	2.16644	1.71299	1.67661	1.65685	1.63655	1.66875	1.97963	1.55049	1.94545	1.78762
12916935	NA	NULL	2.7655	3.33922	2.30658	2.92276	2.85473	3.25027	3.15946	3.98916	2.37716	3.43866	4.12246	3.01271	3.05314	2.6146	3.11687	3.33899
12916937	NA	NULL	4.61342	5.37431	4.63649	4.53584	4.32755	4.54589	4.54632	5.2876	3.86897	4.81441	4.13122	4.70394	3.58768	3.2215	3.55596	2.65556
12916939	NA	NULL	1.74451	2.48332	2.0595	1.66571	1.80665	1.74608	2.51674	1.80555	1.80906	1.49089	1.59376	1.44163	1.6153	1.92379	1.78927	1.94508
12916941	NA	NULL	3.96521	4.23255	3.83053	4.80322	3.85988	3.84168	4.0841	3.99519	3.21029	3.83462	4.70497	3.44975	4.02906	3.46499	3.87313	3.74908
12916943	NA	NULL	2.20736	2.55347	2.74693	2.21834	1.59495	2.22942	2.71942	2.88594	2.58005	2.11661	2.33842	1.94542	3.7609	4.01637	4.49285	2.52867
12916945	NA	NULL	4.47651	5.13914	4.56027	5.79406	4.80544	5.14758	4.7615	4.40192	3.92341	5.35521	4.5133	5.48543	5.34614	4.91834	5.54069	4.41715
12916947	NA	NULL	3.74578	3.83646	3.26901	4.01777	3.57095	4.20397	3.64356	4.18757	2.92106	3.44752	3.75687	3.80626	4.69027	3.39576	3.99877	3.64452
12916949	NA	NULL	1.7287	2.41002	1.78919	1.64402	1.96054	2.04299	2.0433	2.47245	2.36354	2.38198	1.93696	2.07563	2.67426	2.2597	2.08037	2.12974
12916951	NA	NULL	2.55747	2.644	2.60381	2.80876	2.34547	2.01528	3.38154	2.22254	2.66654	2.82768	1.90866	2.93225	3.71945	2.86099	2.99448	3.67406
12916953	NA	NULL	1.98908	1.92457	1.79147	1.76213	2.02492	2.0128	2.00483	1.83368	2.00066	1.78187	2.25906	1.68436	1.82061	2.07972	1.62923	1.80522
12916955	NA	NULL	3.39813	3.87889	3.83139	3.54808	3.65454	3.14447	3.64568	3.15413	3.71428	3.21865	2.02599	2.88519	2.68158	3.6754	3.93178	3.03243
12916957	NA	NULL	4.82649	5.02196	4.87416	5.54619	4.85788	4.69402	5.20012	4.53531	4.7809	4.73354	4.92667	4.60987	3.7802	4.54241	4.27783	4.7573
12916959	NA	NULL	4.51934	4.47469	4.88992	5.39011	4.15618	4.49443	4.36933	4.6422	3.92017	4.62751	5.2299	4.802	6.1677	6.77764	6.90516	6.23594
12916961	NA	NULL	1.53639	1.81	1.82512	1.74522	1.66384	1.57674	2.01433	2.09165	1.81835	1.63525	2.01353	1.68858	2.08385	1.6055	2.05226	1.87075
12916963	NA	NULL	1.92382	1.80211	1.57551	2.00611	2.06829	1.82526	1.99568	1.79382	1.78835	1.62685	2.62003	1.69668	1.50106	1.82611	1.71052	2.06386
12916965	NA	NULL	4.056	4.24716	3.57332	2.83164	4.18636	3.86329	4.48606	4.94704	3.39553	4.22785	3.2956	3.29463	4.16564	4.02125	3.79394	3.75724
12916967	NA	NULL	2.82406	3.66216	2.16999	1.89348	3.60759	2.32139	3.34583	3.08336	2.22892	3.49253	1.80642	2.44662	2.37939	2.77239	2.2172	3.79964
12916969	NA	NULL	2.20607	2.3467	2.3316	1.71536	2.31348	1.78791	2.8135	1.92131	2.82922	4.26495	1.82252	2.51608	1.56066	1.97558	1.5756	1.92245
12916971	NA	NULL	1.78162	1.68253	2.17535	1.92278	1.99877	1.62328	1.81802	1.93093	1.4592	1.51228	2.40655	1.81837	2.03357	2.03572	1.85842	2.13912
12916973	NA	NULL	7.38836	6.50229	8.82442	8.83485	6.20407	6.01099	5.71933	7.20267	6.76904	6.59833	8.33098	7.69313	6.02802	5.50942	5.48325	6.5521
12916975	NA	NULL	1.96143	2.58553	2.16261	1.71536	2.19229	2.28128	1.90184	2.1941	1.83777	2.14171	1.94513	1.87889	2.02102	2.6275	2.43621	2.12846
12916977	NA	NULL	3.23867	3.48576	3.17739	3.36555	2.61675	3.2001	2.82153	3.30149	2.87611	2.92811	2.72645	2.93893	3.53336	4.50154	3.88257	3.10038
12916979	NA	NULL	4.15978	4.36244	4.77045	4.6224	4.60773	3.85508	3.99865	3.92374	3.82522	4.42758	4.98443	4.53336	4.33843	2.77348	3.75868	4.6665
12916981	NA	NULL	2.30501	2.5366	2.73765	2.26467	2.42354	2.57278	2.37186	2.21831	2.6043	1.97718	2.3032	1.89849	2.8952	2.84171	2.2756	2.88546
12916983	NA	NULL	3.17978	3.33678	2.64747	3.31816	2.45934	2.7199	2.796	3.21469	2.95427	3.15901	2.70214	3.25678	2.67508	3.06509	2.83985	2.57943
12916985	NA	NULL	2.10375	1.9015	1.9694	2.03114	1.95303	1.72368	1.90117	1.63	2.01209	2.26737	2.27204	2.10202	3.61437	2.22443	2.43132	2.09932
12916987	NA	NULL	3.27217	2.97377	3.61586	3.87442	2.53915	2.90616	3.44379	3.54878	3.30249	2.70779	3.05979	3.41024	3.7156	4.15963	4.86854	4.51067
12916989	NA	NULL	3.63799	3.2054	2.93294	3.56506	3.13521	3.2054	2.68939	2.82836	3.67597	3.35215	4.20891	3.57904	3.39138	3.20237	2.65888	4.22274
12916991	NA	NULL	1.88915	2.06648	1.55836	1.91728	1.82501	1.76448	1.87465	1.6761	1.86519	2.283	1.76566	1.61375	1.64175	1.8951	1.88561	1.77352
12916993	NA	NULL	1.543	1.92662	1.77057	1.63047	1.69913	1.58485	1.83736	1.97535	1.79114	1.54897	1.5808	1.47471	2.1129	2.10362	1.95725	2.14393
12916995	NA	NULL	2.09498	1.61269	2.117	1.80842	1.48552	1.43518	2.13956	1.91604	1.44187	1.69929	1.7749	1.7673	1.65149	1.79983	2.03852	3.04421
12916997	NA	NULL	3.74839	3.39489	2.70617	3.50216	2.48768	3.03954	4.23781	2.71132	3.04909	3.32607	4.18898	2.72034	2.94244	2.23632	2.53466	1.95159
12916999	NA	NULL	2.64338	2.6489	2.95559	2.85975	2.72728	2.53735	3.31184	3.15007	3.30164	2.71335	3.07545	3.17731	4.09667	3.87306	3.85125	3.5957
12917001	NA	NULL	1.83335	1.82081	1.88844	1.70445	2.01638	2.3046	2.03979	1.91998	1.776	2.03834	1.72197	1.82085	2.13935	2.86063	2.90148	2.38864
12917003	NA	NULL	3.00472	2.6303	4.30881	3.08566	2.49251	2.75017	3.07519	2.41953	2.90833	2.94561	2.99853	3.66861	3.1707	2.56458	4.11095	4.05561
12917005	NA	NULL	4.07949	4.42345	4.59813	4.25914	3.38996	4.42576	3.88051	3.46839	4.09363	4.27865	5.50698	3.89098	5.84907	4.90915	5.62836	4.75506
12917007	NA	NULL	1.88699	1.60988	1.74358	1.56121	1.71435	1.67825	1.64781	1.65954	1.71321	1.98356	1.71354	1.74829	1.99911	2.32666	1.97815	2.1499
12917009	NA	NULL	4.00633	3.33892	3.67432	3.35942	3.37555	4.29961	3.08826	3.75664	3.77068	3.14393	2.6077	2.84048	4.70558	4.70828	3.78979	5.09645
12917011	NA	NULL	2.33072	2.33752	3.17457	3.08237	1.83182	2.10795	1.67228	2.02286	2.02471	1.96492	2.66104	2.89878	3.82626	4.90303	4.42337	5.57955
12917013	NA	NULL	2.57264	2.38043	2.11348	2.08948	2.06774	2.05128	2.40402	2.24691	2.13535	2.48395	2.15933	1.91086	3.21031	2.32357	3.00595	4.13491
12917015	NA	NULL	1.71667	1.71776	1.69372	1.59509	2.05517	1.61746	1.91234	1.43242	1.69936	1.66437	1.49673	1.58794	1.66198	2.04041	1.81551	1.84326
12917017	NA	NULL	2.99322	2.55577	2.75813	3.18827	2.57108	2.43913	2.37286	2.87056	2.33677	2.22411	2.20669	2.12995	4.75248	4.26256	4.27064	4.50258
12917019	NA	NULL	2.05877	2.42715	2.4806	2.41075	2.35965	2.14956	2.66219	2.70346	2.30148	2.07717	2.01697	2.34511	3.56548	2.47837	3.5294	4.25626
12917021	NA	NULL	2.04644	2.40635	2.3195	2.86503	1.78691	2.01267	2.60074	2.32333	2.00391	1.96721	1.88083	2.42347	3.20758	2.44406	3.6254	3.23336
12917023	NA	NULL	2.80451	3.2636	2.76535	2.74201	2.53653	3.01017	2.43079	3.05184	2.1661	2.08686	3.01456	2.6352	3.37737	2.67227	3.29798	4.10325
12917025	NA	NULL	2.66036	2.60376	2.0372	2.01235	2.01246	2.57959	1.97517	2.37779	2.21466	2.12307	2.05554	2.00338	1.99757	2.0817	2.06993	1.99286
12917027	NA	NULL	5.17189	4.25253	5.67262	4.72794	5.15523	5.31752	5.29566	3.95138	5.24546	4.24527	6.00786	5.75896	4.37458	4.53449	4.38126	5.43882
12917029	NA	NULL	2.8558	3.04786	2.71864	2.85414	2.87663	3.00457	3.62919	2.84023	2.49298	2.82108	2.33936	2.88898	2.83145	3.3182	3.51225	2.81566
12917031	NA	NULL	2.45114	2.43941	1.94496	1.80105	2.08561	2.71496	2.96129	2.60295	2.28463	2.21368	2.28638	2.36434	2.81282	3.74156	2.61451	2.25683
12917033	NA	NULL	1.86607	1.93709	2.23439	1.65339	1.6326	2.1832	2.48411	2.21731	1.64279	1.94486	2.07562	1.93095	3.15573	2.98931	2.26555	2.00424
12917035	NA	NULL	4.66665	5.11526	4.64726	5.0744	5.03653	4.71068	4.23136	4.6933	4.68087	4.46069	5.15545	4.83465	4.72987	5.11914	5.30254	4.73286
12917037	NA	NULL	3.93423	4.03494	3.79385	3.11616	3.48413	3.72011	3.97257	4.41149	2.97697	3.423	2.1009	2.90349	5.40255	4.87424	4.47838	5.24329
12917039	NA	NULL	5.08882	5.55511	5.85361	5.26439	4.31849	5.21938	4.97801	4.89265	2.91015	4.67277	3.95762	4.42919	4.70558	4.27434	6.18965	5.29171
12917041	NA	NULL	2.10557	2.50721	2.23646	2.9954	2.18883	2.2967	2.42405	2.86153	3.19017	2.61456	1.85888	1.76627	2.98253	2.6261	2.56544	2.2662
12917043	NA	NULL	2.89699	2.75602	2.96188	3.66076	2.60051	2.98866	2.9341	3.23103	2.44268	2.70775	1.72842	3.34085	3.31018	3.87043	3.2921	3.18916
12917045	NA	NULL	1.67619	2.02992	1.54959	1.66571	1.6312	1.72068	1.94381	1.65652	1.75996	1.91212	1.54085	1.59205	1.73966	1.9632	1.80735	1.67388
12917047	NA	NULL	2.55152	2.59304	2.47829	3.31572	2.12493	1.75475	2.12349	2.54984	2.23985	2.56945	1.95022	2.66668	3.71675	2.95307	2.83458	3.05849
12917049	NA	NULL	1.7257	1.50487	1.63047	1.48079	1.65299	1.7554	1.74877	1.63496	1.63752	1.71895	1.42401	1.69968	1.6132	2.0474	1.52309	2.22159
12917051	NA	NULL	3.59795	3.73761	4.87886	5.76622	3.74773	3.57345	3.80572	3.49075	3.65793	3.50246	4.69022	4.3314	4.17967	4.72831	3.90629	4.41555
12917053	NA	NULL	1.88587	1.9735	1.88321	1.82305	1.83055	1.72588	2.04337	1.94092	1.90082	1.80887	2.05452	1.85357	2.02405	2.10954	2.57023	1.86858
12917055	NA	NULL	2.03276	2.14464	3.02329	3.10835	1.96407	2.17185	2.23304	1.94309	2.11046	1.91774	2.64503	2.09763	4.12858	2.55316	4.3885	3.98603
12917057	NA	NULL	2.17813	1.88409	1.86277	1.62648	2.1045	1.78613	1.8545	1.85461	1.83889	1.91424	1.43674	1.63836	2.16903	1.65466	1.73861	1.84855
12917059	NA	NULL	4.95301	4.85304	4.9918	5.62999	4.55415	4.91503	4.66266	4.82492	5.13212	4.60015	4.75475	4.57232	5.47232	5.86684	5.5852	5.39517
12917061	NA	NULL	5.22342	5.88414	5.83437	4.86908	4.88397	4.85441	5.86751	5.93534	4.59737	4.76746	4.16647	4.93978	5.52673	5.66419	5.20178	6.3503
12917063	NA	NULL	5.21163	6.13954	5.24682	6.11958	5.64474	5.75915	5.83305	6.49058	5.31089	5.50426	6.04225	7.1421	5.59447	6.76944	6.22071	5.26709
12917065	NA	NULL	1.54867	1.80634	1.82142	1.59721	2.28439	1.57688	1.66526	1.72983	1.63741	1.66218	1.77773	1.50531	1.76217	1.54693	1.47783	1.68265
12917067	NA	NULL	2.19875	2.61867	1.92877	2.51481	2.13354	1.97096	1.60651	2.68235	1.95981	2.12594	2.11809	2.2226	1.92242	2.21706	2.3619	2.46977
12917069	NA	NULL	2.244	2.05606	1.82041	1.87469	2.14025	2.51958	2.5916	2.0183	1.6725	2.14788	2.59293	1.67619	2.43604	3.05462	3.1598	2.34104
12917071	NA	NULL	4.66976	4.77778	5.97829	5.89746	4.48467	5.26079	4.42823	5.01988	4.17327	4.65319	5.26911	5.20827	7.12548	7.49243	7.15144	7.22532
12917073	NA	NULL	2.9869	3.30028	3.19732	3.23117	2.83074	2.07016	3.34351	3.18968	3.40774	2.82059	2.86626	3.55398	4.68623	4.72506	3.86069	4.36573
12917075	NA	NULL	2.73679	2.83906	2.37162	2.37532	2.02065	2.10313	2.52808	2.36841	2.76617	2.30364	2.2678	2.20545	2.84682	3.19232	2.62034	3.20698
12917077	NA	NULL	2.73138	1.9604	2.10771	4.00058	2.28259	2.42386	2.33162	2.29238	2.4516	2.03594	4.03804	2.1859	2.92812	2.25875	2.53897	3.36789
12917079	NA	NULL	1.81296	1.96514	2.02735	2.16117	2.04837	1.69353	1.76298	2.21764	1.49808	1.56066	1.79616	2.08221	2.88576	2.99713	2.89079	2.31991
12917081	NA	NULL	1.63513	1.74963	1.45339	1.36783	1.6052	1.34416	1.55699	1.6411	1.62897	1.45937	1.40135	1.51044	1.68875	1.78517	1.35701	1.52525
12917083	NA	NULL	2.30898	2.3245	2.5321	2.38776	2.4842	2.0343	2.26255	2.27753	2.05206	2.52409	2.58107	2.70619	2.82913	2.47258	2.35462	2.07578
12917085	NA	NULL	2.08349	2.62743	2.46543	2.80978	2.5384	2.57207	2.33065	2.15367	2.26994	2.34141	2.55422	1.97659	1.94097	1.89168	1.94287	2.30055
12917087	NA	NULL	2.23304	2.33452	2.66411	2.16588	1.84295	2.79505	3.74105	3.51508	2.45704	2.7548	2.15782	2.10799	2.39573	2.5533	2.40202	2.25888
12917089	NA	NULL	2.17428	3.43726	1.64934	2.49929	2.4325	2.71367	3.82401	2.68739	2.35828	2.70941	1.77925	2.32759	2.95816	2.11889	2.2264	3.39756
12917091	NA	NULL	1.83294	2.25922	1.68877	1.95103	1.78671	1.95537	3.37646	2.0765	2.17335	2.00948	1.85096	1.66879	2.38116	2.4837	1.50633	2.03664
12917093	NA	NULL	3.66471	4.40122	3.78089	3.08569	3.10421	3.45932	5.60988	4.08044	2.63019	3.48518	3.2568	3.10753	4.40821	3.72279	4.38505	4.32814
12917095	NA	NULL	3.01423	3.96175	2.84176	2.85335	3.0204	2.43205	3.36221	3.812	2.52114	3.33934	2.27184	2.29004	2.66314	2.64977	2.53398	2.07674
12917097	NA	NULL	3.6961	3.72085	2.85455	2.91099	3.35235	4.51911	5.5624	3.36837	2.66389	3.50038	3.02933	3.05564	4.52277	4.39631	4.39307	4.11259
12917099	NA	NULL	3.14458	3.5626	3.60444	3.18889	3.99311	3.02224	3.01023	3.25883	2.83703	2.83391	3.53286	3.40602	3.19673	2.87752	3.15893	3.19127
12917101	NA	NULL	3.02882	2.88694	3.52706	3.72156	2.84623	3.01218	3.80726	3.01719	2.60944	3.35553	2.97768	3.53911	3.28325	2.45226	2.82854	2.52363
12917103	NA	NULL	3.15816	2.72619	4.25231	3.43448	2.52825	3.11759	3.45984	3.27027	3.26079	2.99836	2.74827	3.89134	2.77083	3.00553	4.00706	3.08908
12917105	NA	NULL	2.85796	2.96736	3.08021	2.73662	2.22317	2.73999	3.89167	3.02943	2.27838	3.34392	2.35789	2.46523	3.20646	2.705	2.49397	3.33134
12917107	NA	NULL	4.76736	5.20084	4.51029	4.69028	3.24226	4.09916	4.35532	4.0393	4.18809	5.00894	3.97773	4.81791	5.50017	5.40782	5.14918	5.50377
12917109	NA	NULL	4.13811	3.78929	3.25411	3.25307	3.02081	3.17176	3.83391	3.72167	3.57124	4.57519	4.5191	3.68917	3.51361	3.21166	4.40714	4.60021
12917111	NA	NULL	4.74727	6.02659	4.94564	4.78317	4.65332	3.98634	5.46467	5.25869	4.26003	5.62011	4.92015	4.20201	6.10394	5.73302	5.38588	6.10119
12917113	NA	NULL	4.17623	4.36882	5.71344	5.69495	3.27697	3.00781	4.29075	4.28908	4.62431	4.82987	3.74106	5.12101	4.94808	4.02502	4.75812	5.09245
12917115	NA	NULL	2.40682	2.28892	2.44655	2.43184	2.31486	2.13777	2.60374	2.35575	2.58522	2.149	2.35466	2.6019	3.98796	3.09849	3.69576	4.82931
12917117	NA	NULL	1.48302	1.46516	1.5707	1.55682	1.86087	1.51628	1.68313	1.65233	1.6779	1.56344	1.34378	1.52553	2.18662	1.658	1.70008	1.46354
12917119	NA	NULL	2.53081	3.54784	3.21622	3.08932	2.99297	2.63735	3.10681	3.22765	2.76179	3.00777	2.45559	2.96654	4.05279	3.56661	3.30657	4.435
12917121	NA	NULL	4.38629	3.83531	5.15446	5.38659	3.5338	4.71473	3.77986	4.12708	4.2962	3.64566	5.34304	5.5093	6.3173	5.56907	5.42987	4.67616
12917123	NA	NULL	4.09845	3.44039	4.87129	4.35697	3.94437	3.61124	3.9008	3.18578	4.5644	4.24468	5.10789	4.48836	5.52218	3.74948	4.68625	4.54356
12917125	NA	NULL	2.38597	2.75343	3.12183	2.63841	1.86087	2.18354	2.74108	2.29766	2.1879	2.43408	3.05825	3.05319	3.63852	4.14668	3.75397	3.01161
12917127	NA	NULL	6.177	6.21947	7.74903	7.65976	5.6747	6.2278	6.4566	6.0018	5.82696	5.8015	7.12121	7.6822	7.07064	6.44105	6.66133	6.16124
12917129	NA	NULL	4.06291	4.71436	4.91295	4.33386	4.19813	4.07612	3.76859	4.3946	3.96116	4.66185	4.13404	5.38352	4.28009	5.27488	4.53295	4.79236
12917131	NA	NULL	5.46594	5.52921	5.46594	5.88316	5.21944	5.17063	5.91123	5.38168	5.34097	5.31908	6.35184	6.24938	5.81667	5.00826	5.13256	4.7086
12917133	NA	NULL	4.63932	5.19744	6.67583	5.96377	4.66185	5.0356	5.02651	5.21538	4.51866	4.7799	5.94196	5.55947	5.97882	6.05872	6.09147	6.28136
12917135	NA	NULL	2.65853	3.33124	3.37614	4.0374	2.76305	2.47232	3.54857	3.82682	3.05993	3.42963	2.6499	2.91612	3.8129	2.75439	3.06185	3.5131
12917137	NA	NULL	2.15606	2.55436	2.20707	3.64281	2.46318	3.09163	2.26553	2.70576	2.46263	2.12376	3.20092	3.23511	4.11564	5.15349	5.05856	6.31519
12917139	NA	NULL	2.056	2.1935	1.98587	2.37099	2.00693	1.99135	2.13464	2.47009	1.62983	2.09641	1.93459	2.04417	2.46622	4.33438	2.53363	2.84699
12917141	NA	NULL	2.69564	2.90538	2.99305	1.88122	2.20554	1.90212	3.34204	2.02699	2.95002	2.7761	2.514	2.99739	2.95821	2.45998	2.50333	3.0358
12917143	NA	NULL	3.23417	3.50272	2.2532	2.89176	3.69751	3.03262	4.59528	3.76148	2.99161	3.88113	2.57833	2.75743	3.23527	2.32521	3.18505	2.7393
12917145	NA	NULL	5.39324	4.62459	4.11112	4.51416	4.12969	3.94584	6.01045	5.13343	5.33242	5.36981	5.48269	3.70806	5.23672	6.23651	5.34729	5.58879
12917147	NA	NULL	4.81214	4.79835	5.22401	5.63045	4.8952	4.49845	4.83795	4.91383	4.7297	4.78695	5.91639	4.87514	5.03675	4.43545	4.096	5.22228
12917149	NA	NULL	1.98899	2.78696	3.0705	3.39487	2.87981	2.4918	3.48344	2.17258	2.44177	3.22124	2.38984	2.60345	2.75349	3.78036	4.88739	3.99483
12917151	NA	NULL	1.80745	1.78606	1.879	2.08493	1.92111	1.64222	2.05074	2.13688	2.15629	1.99535	3.0628	2.40199	2.3078	3.23474	2.85121	3.28634
12917153	NA	NULL	5.15857	6.29724	4.56475	5.57152	6.05069	5.98311	6.72791	6.40473	5.08053	6.52471	4.50268	5.3317	5.63374	6.54715	5.91259	5.73765
12917155	NA	NULL	2.0386	2.66727	2.04719	3.53595	2.63442	2.50456	2.44688	1.92384	3.00081	2.30195	2.08339	2.29479	1.9206	2.11862	1.79284	1.72141
12917157	NA	NULL	4.03241	3.87614	4.18322	4.42193	4.26361	4.40149	4.52653	4.72149	4.31309	5.04329	3.38126	3.3246	4.9412	5.3455	4.56165	4.92113
12917159	NA	NULL	2.2192	2.61715	3.18568	2.81455	1.68274	2.6282	2.64768	2.93793	2.69783	2.28546	2.80693	2.43769	3.36868	3.09628	3.05955	4.30794
12917161	NA	NULL	1.82346	1.62511	1.46682	1.95512	1.83892	1.96823	2.17397	1.70617	1.69328	1.62134	2.77702	2.15065	2.02673	1.99441	2.57152	2.33979
12917163	NA	NULL	2.13269	2.33403	2.51401	2.9846	1.82039	2.15712	2.66686	2.27483	2.31645	2.57284	2.40147	1.94034	2.38964	2.05256	2.04598	3.06575
12917165	NA	NULL	3.98659	4.11655	5.58902	4.22481	4.10614	3.74274	4.90681	4.07383	4.46809	4.07771	4.54164	4.07102	3.67895	4.80971	4.44532	3.73364
12917167	NA	NULL	3.44652	3.69395	3.29167	3.24016	3.5074	2.93958	3.73783	3.39865	3.54267	3.68696	3.24695	3.74785	3.84808	3.87343	4.79578	4.63379
12917169	NA	NULL	2.93934	2.74665	2.95239	3.30269	2.93925	2.88143	3.01886	3.55235	2.59316	2.92999	3.62033	2.77742	5.41098	5.55494	4.75197	5.29974
12917171	NA	NULL	2.19875	2.61867	1.92877	2.51481	2.13354	1.97096	1.60651	2.68235	1.95981	2.12594	2.11809	2.2226	1.92242	2.21706	2.3619	2.46977
12917173	NA	NULL	2.244	2.05606	1.82041	1.87469	2.14025	2.51958	2.5916	2.0183	1.6725	2.14788	2.59293	1.67619	2.43604	3.05462	3.1598	2.34104
12917175	NA	NULL	4.66976	4.77778	5.97829	5.89746	4.48467	5.26079	4.42823	5.01988	4.17327	4.65319	5.26911	5.20827	7.12548	7.49243	7.15144	7.22532
12917177	NA	NULL	2.9869	3.30028	3.19732	3.23117	2.83074	2.07016	3.34351	3.18968	3.40774	2.82059	2.86626	3.55398	4.68623	4.72506	3.86069	4.36573
12917179	NA	NULL	2.73679	2.83906	2.37162	2.37532	2.02065	2.10313	2.52808	2.36841	2.76617	2.30364	2.2678	2.20545	2.84682	3.19232	2.62034	3.20698
12917181	NA	NULL	2.73138	1.9604	2.10771	4.00058	2.28259	2.42386	2.33162	2.29238	2.4516	2.03594	4.03804	2.1859	2.92812	2.25875	2.53897	3.36789
12917183	NA	NULL	1.81296	1.96514	2.02735	2.16117	2.04837	1.69353	1.76298	2.21764	1.49808	1.56066	1.79616	2.08221	2.88576	2.99713	2.89079	2.31991
12917185	NA	NULL	1.63513	1.74963	1.45339	1.36783	1.6052	1.34416	1.55699	1.6411	1.62897	1.45937	1.40135	1.51044	1.68875	1.78517	1.35701	1.52525
12917187	NA	NULL	2.30898	2.3245	2.5321	2.38776	2.4842	2.0343	2.26255	2.27753	2.05206	2.52409	2.58107	2.70619	2.82913	2.47258	2.35462	2.07578
12917189	NA	NULL	2.08349	2.62743	2.46543	2.80978	2.5384	2.57207	2.33065	2.15367	2.26994	2.34141	2.55422	1.97659	1.94097	1.89168	1.94287	2.30055
12917191	NA	NULL	2.23304	2.33452	2.66411	2.16588	1.84295	2.79505	3.74105	3.51508	2.45704	2.7548	2.15782	2.10799	2.39573	2.5533	2.40202	2.25888
12917193	NA	NULL	2.17428	3.43726	1.64934	2.49929	2.4325	2.71367	3.82401	2.68739	2.35828	2.70941	1.77925	2.32759	2.95816	2.11889	2.2264	3.39756
12917195	NA	NULL	1.83294	2.25922	1.68877	1.95103	1.78671	1.95537	3.37646	2.0765	2.17335	2.00948	1.85096	1.66879	2.38116	2.4837	1.50633	2.03664
12917197	NA	NULL	3.66471	4.40122	3.78089	3.08569	3.10421	3.45932	5.60988	4.08044	2.63019	3.48518	3.2568	3.10753	4.40821	3.72279	4.38505	4.32814
12917199	NA	NULL	3.01423	3.96175	2.84176	2.85335	3.0204	2.43205	3.36221	3.812	2.52114	3.33934	2.27184	2.29004	2.66314	2.64977	2.53398	2.07674
12917201	NA	NULL	3.6961	3.72085	2.85455	2.91099	3.35235	4.51911	5.5624	3.36837	2.66389	3.50038	3.02933	3.05564	4.52277	4.39631	4.39307	4.11259
12917203	NA	NULL	3.14458	3.5626	3.60444	3.18889	3.99311	3.02224	3.01023	3.25883	2.83703	2.83391	3.53286	3.40602	3.19673	2.87752	3.15893	3.19127
12917205	NA	NULL	3.02882	2.88694	3.52706	3.72156	2.84623	3.01218	3.80726	3.01719	2.60944	3.35553	2.97768	3.53911	3.28325	2.45226	2.82854	2.52363
12917207	NA	NULL	3.15816	2.72619	4.25231	3.43448	2.52825	3.11759	3.45984	3.27027	3.26079	2.99836	2.74827	3.89134	2.77083	3.00553	4.00706	3.08908
12917209	NA	NULL	2.85796	2.96736	3.08021	2.73662	2.22317	2.73999	3.89167	3.02943	2.27838	3.34392	2.35789	2.46523	3.20646	2.705	2.49397	3.33134
12917211	NA	NULL	4.76736	5.20084	4.51029	4.69028	3.24226	4.09916	4.35532	4.0393	4.18809	5.00894	3.97773	4.81791	5.50017	5.40782	5.14918	5.50377
12917213	NA	NULL	4.13811	3.78929	3.25411	3.25307	3.02081	3.17176	3.83391	3.72167	3.57124	4.57519	4.5191	3.68917	3.51361	3.21166	4.40714	4.60021
12917215	NA	NULL	4.74727	6.02659	4.94564	4.78317	4.65332	3.98634	5.46467	5.25869	4.26003	5.62011	4.92015	4.20201	6.10394	5.73302	5.38588	6.10119
12917217	NA	NULL	4.17623	4.36882	5.71344	5.69495	3.27697	3.00781	4.29075	4.28908	4.62431	4.82987	3.74106	5.12101	4.94808	4.02502	4.75812	5.09245
12917219	NA	NULL	2.40682	2.28892	2.44655	2.43184	2.31486	2.13777	2.60374	2.35575	2.58522	2.149	2.35466	2.6019	3.98796	3.09849	3.69576	4.82931
12917221	NA	NULL	1.48302	1.46516	1.5707	1.55682	1.86087	1.51628	1.68313	1.65233	1.6779	1.56344	1.34378	1.52553	2.18662	1.658	1.70008	1.46354
12917223	NA	NULL	2.53081	3.54784	3.21622	3.08932	2.99297	2.63735	3.10681	3.22765	2.76179	3.00777	2.45559	2.96654	4.05279	3.56661	3.30657	4.435
12917225	NA	NULL	4.38629	3.83531	5.15446	5.38659	3.5338	4.71473	3.77986	4.12708	4.2962	3.64566	5.34304	5.5093	6.3173	5.56907	5.42987	4.67616
12917227	NA	NULL	4.09845	3.44039	4.87129	4.35697	3.94437	3.61124	3.9008	3.18578	4.5644	4.24468	5.10789	4.48836	5.52218	3.74948	4.68625	4.54356
12917229	NA	NULL	2.38597	2.75343	3.12183	2.63841	1.86087	2.18354	2.74108	2.29766	2.1879	2.43408	3.05825	3.05319	3.63852	4.14668	3.75397	3.01161
12917231	NA	NULL	6.177	6.21947	7.74903	7.65976	5.6747	6.2278	6.4566	6.0018	5.82696	5.8015	7.12121	7.6822	7.07064	6.44105	6.66133	6.16124
12917233	NA	NULL	4.06291	4.71436	4.91295	4.33386	4.19813	4.07612	3.76859	4.3946	3.96116	4.66185	4.13404	5.38352	4.28009	5.27488	4.53295	4.79236
12917235	NA	NULL	5.46594	5.52921	5.46594	5.88316	5.21944	5.17063	5.91123	5.38168	5.34097	5.31908	6.35184	6.24938	5.81667	5.00826	5.13256	4.7086
12917237	NA	NULL	4.63932	5.19744	6.67583	5.96377	4.66185	5.0356	5.02651	5.21538	4.51866	4.7799	5.94196	5.55947	5.97882	6.05872	6.09147	6.28136
12917239	NA	NULL	2.65853	3.33124	3.37614	4.0374	2.76305	2.47232	3.54857	3.82682	3.05993	3.42963	2.6499	2.91612	3.8129	2.75439	3.06185	3.5131
12917241	NA	NULL	2.15606	2.55436	2.20707	3.64281	2.46318	3.09163	2.26553	2.70576	2.46263	2.12376	3.20092	3.23511	4.11564	5.15349	5.05856	6.31519
12917243	NA	NULL	2.056	2.1935	1.98587	2.37099	2.00693	1.99135	2.13464	2.47009	1.62983	2.09641	1.93459	2.04417	2.46622	4.33438	2.53363	2.84699
12917245	NA	NULL	2.69564	2.90538	2.99305	1.88122	2.20554	1.90212	3.34204	2.02699	2.95002	2.7761	2.514	2.99739	2.95821	2.45998	2.50333	3.0358
12917247	NA	NULL	3.23417	3.50272	2.2532	2.89176	3.69751	3.03262	4.59528	3.76148	2.99161	3.88113	2.57833	2.75743	3.23527	2.32521	3.18505	2.7393
12917249	NA	NULL	5.39324	4.62459	4.11112	4.51416	4.12969	3.94584	6.01045	5.13343	5.33242	5.36981	5.48269	3.70806	5.23672	6.23651	5.34729	5.58879
12917251	NA	NULL	4.81214	4.79835	5.22401	5.63045	4.8952	4.49845	4.83795	4.91383	4.7297	4.78695	5.91639	4.87514	5.03675	4.43545	4.096	5.22228
12917253	NA	NULL	1.98899	2.78696	3.0705	3.39487	2.87981	2.4918	3.48344	2.17258	2.44177	3.22124	2.38984	2.60345	2.75349	3.78036	4.88739	3.99483
12917255	NA	NULL	1.80745	1.78606	1.879	2.08493	1.92111	1.64222	2.05074	2.13688	2.15629	1.99535	3.0628	2.40199	2.3078	3.23474	2.85121	3.28634
12917257	NA	NULL	5.15857	6.29724	4.56475	5.57152	6.05069	5.98311	6.72791	6.40473	5.08053	6.52471	4.50268	5.3317	5.63374	6.54715	5.91259	5.73765
12917259	NA	NULL	2.0386	2.66727	2.04719	3.53595	2.63442	2.50456	2.44688	1.92384	3.00081	2.30195	2.08339	2.29479	1.9206	2.11862	1.79284	1.72141
12917261	NA	NULL	4.03241	3.87614	4.18322	4.42193	4.26361	4.40149	4.52653	4.72149	4.31309	5.04329	3.38126	3.3246	4.9412	5.3455	4.56165	4.92113
12917263	NA	NULL	2.2192	2.61715	3.18568	2.81455	1.68274	2.6282	2.64768	2.93793	2.69783	2.28546	2.80693	2.43769	3.36868	3.09628	3.05955	4.30794
12917265	NA	NULL	1.82346	1.62511	1.46682	1.95512	1.83892	1.96823	2.17397	1.70617	1.69328	1.62134	2.77702	2.15065	2.02673	1.99441	2.57152	2.33979
12917267	NA	NULL	2.13269	2.33403	2.51401	2.9846	1.82039	2.15712	2.66686	2.27483	2.31645	2.57284	2.40147	1.94034	2.38964	2.05256	2.04598	3.06575
12917269	NA	NULL	3.98659	4.11655	5.58902	4.22481	4.10614	3.74274	4.90681	4.07383	4.46809	4.07771	4.54164	4.07102	3.67895	4.80971	4.44532	3.73364
12917271	NA	NULL	3.44652	3.69395	3.29167	3.24016	3.5074	2.93958	3.73783	3.39865	3.54267	3.68696	3.24695	3.74785	3.84808	3.87343	4.79578	4.63379
12917273	NA	NULL	2.93934	2.74665	2.95239	3.30269	2.93925	2.88143	3.01886	3.55235	2.59316	2.92999	3.62033	2.77742	5.41098	5.55494	4.75197	5.29974
12917275	NA	NULL	2.25662	2.63192	2.45672	3.2289	1.89687	2.98183	2.82215	2.49702	3.00618	2.6764	2.98138	2.63738	3.63103	3.31081	2.69228	4.90621
12917277	NA	NULL	3.74498	3.40392	4.59525	4.67084	3.36508	3.35255	3.15684	3.6738	4.15525	3.58461	5.65885	4.33457	2.77961	3.36724	3.19596	3.46389
12917279	NA	NULL	3.07272	3.53881	3.59237	3.7416	3.51093	3.2063	3.33637	3.10277	3.10733	3.76673	3.1333	3.37654	4.09228	4.35672	3.44562	4.09689
12917281	NA	NULL	1.85492	1.98759	2.45911	1.92208	2.24944	1.90566	2.55239	1.97543	1.92438	2.4079	1.55979	1.80855	2.0352	2.00265	1.97884	2.15327
12917283	NA	NULL	2.86117	2.54657	3.10736	2.93747	2.32485	2.39618	2.30269	1.98581	2.60068	1.92954	2.10163	1.89827	2.80216	3.06363	2.56829	2.87197
12917285	NA	NULL	4.71393	4.61149	7.9831	8.38667	3.56892	4.39277	4.53933	4.90325	4.41023	4.39503	5.44322	7.29153	6.851	7.34937	7.3094	7.6939
12917287	NA	NULL	1.87197	2.10411	1.86195	1.93331	1.53338	1.91596	2.29956	1.75283	1.97862	2.0827	1.72172	1.89487	1.79034	1.95202	2.20135	2.52631
12917289	NA	NULL	2.53775	2.65671	1.58172	2.19154	2.77609	2.50387	2.09188	2.71018	2.48393	2.54023	2.33963	1.77978	2.65368	2.80975	2.31854	2.11282
12917291	NA	NULL	1.63847	1.77023	1.69489	2.45891	2.00764	1.93088	1.64371	1.89987	2.06802	2.08214	1.84329	1.60032	1.81919	1.85882	1.70239	2.01564
12917293	NA	NULL	1.82082	2.28298	2.54293	3.73479	2.39361	2.05578	1.72376	2.56732	2.44318	1.99474	2.28222	2.5486	2.90146	2.43737	3.03265	2.99156
12917295	NA	NULL	2.37541	1.81232	2.95763	2.33251	2.39603	2.09219	3.73392	2.06669	2.06068	2.99182	2.09631	2.1897	3.01744	2.22147	2.31238	2.23912
12917297	NA	NULL	1.99348	1.88216	2.28528	2.70196	2.14971	2.43651	2.60431	2.09273	2.18917	2.07701	1.95461	1.83468	2.07467	2.54255	2.02331	1.9855
12917299	NA	NULL	2.90247	3.39743	2.52733	2.00157	2.89727	2.57968	2.75825	2.80108	2.642	3.08212	2.60522	2.73214	2.56697	3.51836	2.69252	2.65959
12917301	NA	NULL	1.57994	1.95429	1.70417	1.52967	1.70129	1.83255	1.78709	1.76474	1.73259	2.10317	1.45766	1.5947	2.16761	2.20576	1.82004	1.67387
12917303	NA	NULL	1.82172	2.44778	2.23307	2.22114	1.95857	2.00529	2.76911	2.30165	1.73025	2.41508	2.23694	2.43719	1.75855	2.57625	1.82947	2.10297
12917305	NA	NULL	2.717	2.16603	1.73987	1.77465	2.7125	2.16713	1.99594	1.69078	2.14746	1.93924	1.78338	2.02749	1.61214	2.45893	1.98211	2.1532
12917307	NA	NULL	2.62606	3.24628	2.25147	2.49749	3.27808	2.6381	3.94041	3.41344	2.64039	3.09156	2.40937	2.06276	2.89447	2.94087	2.67074	3.02408
12917309	NA	NULL	1.50744	1.78256	1.60267	1.81206	1.79602	1.62355	1.67639	1.968	1.54184	1.98304	1.56511	1.48898	2.01734	1.88732	2.65571	2.30786
12917311	NA	NULL	2.20307	3.0588	2.44645	2.43098	3.15953	2.17092	3.45142	2.74333	2.75444	2.68532	2.54955	2.36531	2.64446	2.14888	2.46955	2.45298
12917313	NA	NULL	2.67567	2.52692	2.3517	2.49572	2.38642	3.67679	4.39685	3.55367	1.72933	2.68188	2.45834	2.76921	3.85091	3.22507	3.06804	4.45089
12917315	NA	NULL	2.18006	2.25981	1.7933	1.8483	1.97921	2.09116	2.44611	2.03007	2.30566	1.79018	1.76574	1.65404	2.79547	2.51002	2.93639	2.03573
12917317	NA	NULL	1.58067	1.75557	2.67256	2.31828	2.19651	1.83532	1.92675	2.62403	1.87144	1.82507	1.94021	2.42917	1.95616	2.38259	1.96334	2.34666
12917319	NA	NULL	5.46654	5.49045	5.72864	5.78726	3.9242	3.47415	6.05731	5.26972	5.94717	5.04914	6.35691	5.27567	4.41741	4.20494	4.81512	5.30172
12917321	NA	NULL	4.19604	3.54771	3.83968	3.45792	3.34386	3.24547	4.32375	3.87256	4.72458	4.38126	3.09392	3.47614	2.52969	3.15811	4.20389	2.67639
12917323	NA	NULL	2.96975	2.82175	2.47266	2.76327	3.08303	3.03411	3.15918	3.41676	2.57907	3.24579	2.55685	2.81049	3.27413	3.98509	3.30674	3.43906
12917325	NA	NULL	5.49198	6.64135	3.89939	3.56144	7.60497	7.30638	6.79573	6.99786	6.12339	7.10143	6.26075	6.21412	6.8181	5.58425	6.45307	5.92865
12917327	NA	NULL	6.14261	7.11292	5.96392	5.51264	7.17916	7.14949	7.59452	6.98844	6.67429	7.26934	5.44847	6.22522	6.22845	6.41534	6.29891	6.78153
12917329	NA	NULL	4.61799	5.65239	4.56184	4.26187	4.59246	5.36825	5.50227	5.09843	5.63711	5.48189	4.58192	6.09335	5.30974	4.85084	3.96209	3.93597
12917331	NA	NULL	6.13425	6.12435	4.8482	5.1782	6.20952	6.53498	7.45363	6.20632	5.99407	6.45336	3.65379	5.42389	6.4089	6.29979	6.06535	6.22207
12917333	NA	NULL	2.25662	2.63192	2.45672	3.2289	1.89687	2.98183	2.82215	2.49702	3.00618	2.6764	2.98138	2.63738	3.63103	3.31081	2.69228	4.90621
12917335	NA	NULL	3.74498	3.40392	4.59525	4.67084	3.36508	3.35255	3.15684	3.6738	4.15525	3.58461	5.65885	4.33457	2.77961	3.36724	3.19596	3.46389
12917337	NA	NULL	3.07272	3.53881	3.59237	3.7416	3.51093	3.2063	3.33637	3.10277	3.10733	3.76673	3.1333	3.37654	4.09228	4.35672	3.44562	4.09689
12917339	NA	NULL	1.85492	1.98759	2.45911	1.92208	2.24944	1.90566	2.55239	1.97543	1.92438	2.4079	1.55979	1.80855	2.0352	2.00265	1.97884	2.15327
12917341	NA	NULL	2.86117	2.54657	3.10736	2.93747	2.32485	2.39618	2.30269	1.98581	2.60068	1.92954	2.10163	1.89827	2.80216	3.06363	2.56829	2.87197
12917343	NA	NULL	4.71393	4.61149	7.9831	8.38667	3.56892	4.39277	4.53933	4.90325	4.41023	4.39503	5.44322	7.29153	6.851	7.34937	7.3094	7.6939
12917345	NA	NULL	1.87197	2.10411	1.86195	1.93331	1.53338	1.91596	2.29956	1.75283	1.97862	2.0827	1.72172	1.89487	1.79034	1.95202	2.20135	2.52631
12917347	NA	NULL	2.53775	2.65671	1.58172	2.19154	2.77609	2.50387	2.09188	2.71018	2.48393	2.54023	2.33963	1.77978	2.65368	2.80975	2.31854	2.11282
12917349	NA	NULL	5.48381	6.04988	6.22095	6.47811	5.79882	5.8708	5.4032	5.98039	5.16039	6.12925	5.93278	6.23294	6.78311	6.68011	7.13769	6.59371
12917351	NA	NULL	3.66164	3.3089	3.95923	3.47372	3.79988	3.63311	3.52011	3.98161	3.92661	2.94277	3.02559	3.30722	4.48582	4.87956	4.31884	3.90676
12917353	NA	NULL	2.28516	2.82092	2.18121	1.91539	2.156	2.26031	2.95945	3.18348	2.35657	2.34871	2.57448	2.04657	2.0014	2.9698	2.5737	2.1815
12917355	NA	NULL	1.7241	1.74445	1.71138	1.77763	1.6255	1.56274	1.74877	1.76718	1.54562	1.65343	1.70335	1.82096	1.63981	1.9985	2.05574	1.86497
12917357	NA	NULL	1.95657	2.16681	2.18718	2.01379	1.85678	1.62199	2.24707	2.01685	1.68245	2.76945	2.41306	2.36319	2.44618	2.02534	2.34654	2.1066
12917359	NA	NULL	3.02536	3.64768	2.02047	2.46414	2.15381	1.96039	3.39519	2.64172	2.84507	2.7909	1.83316	1.97378	3.27301	3.63197	3.04024	2.98283
12917361	NA	NULL	2.9301	3.79074	1.67542	1.9488	3.1618	2.28655	3.34418	2.80904	1.68592	2.44545	1.68448	1.84284	2.72301	2.8731	1.96047	2.83852
12917363	NA	NULL	5.8099	5.30573	6.00393	4.94274	4.07949	4.79477	4.39458	4.01245	4.21051	4.3486	4.87133	4.39271	6.148	6.25969	6.29027	6.78218
12917365	NA	NULL	5.62604	6.04027	5.75411	4.79669	5.12132	5.84692	5.49186	5.57566	5.02858	5.64196	5.87895	5.40355	5.2434	4.56433	5.93783	5.18747
12917367	NA	NULL	3.43049	4.03284	2.39015	2.81336	3.37578	2.6905	3.46897	4.32571	2.77822	3.54491	1.92153	2.46134	3.01118	2.95328	2.86	2.51077
12917369	NA	NULL	4.01645	4.40985	5.15654	5.03195	4.49858	4.92019	4.63957	4.0931	4.46697	4.04011	5.56654	5.30078	4.69324	6.06567	4.84725	5.57372
12917371	NA	NULL	5.03366	6.15084	5.0014	4.79844	5.85194	5.27259	5.49622	5.90373	4.9869	5.27575	6.17888	4.86751	5.48454	4.69955	4.2441	4.72361
12917373	NA	NULL	5.78291	6.7873	5.11071	5.01797	6.67079	6.53031	6.60012	7.08101	5.47552	6.06744	5.37062	5.89019	7.0544	5.66053	6.47809	5.02824
12917375	NA	NULL	5.23162	6.33675	4.92716	4.27751	4.77883	5.12439	5.37067	6.48128	4.42338	5.12878	2.92855	4.30156	5.38077	5.40772	5.91873	5.44982
12917377	NA	NULL	3.99101	5.35803	4.11455	4.02715	3.78523	3.5651	3.76029	4.93552	3.52279	4.71661	3.43144	4.02206	4.48263	4.54078	4.52963	4.63155
12917379	NA	NULL	5.97592	6.31102	5.91847	6.12014	5.7428	5.69533	5.50541	5.92437	5.15744	6.05697	5.79639	5.80023	5.50654	6.09465	5.52386	6.92972
12917381	NA	NULL	3.45897	3.44007	5.99929	6.91337	3.60207	3.66843	3.79334	4.56048	3.33978	3.44652	6.25318	5.32257	6.18069	5.58459	5.86252	6.0294
12917383	NA	NULL	4.19521	3.55341	5.18405	5.40413	3.32456	3.47259	3.38953	3.47521	3.33945	3.53731	4.24557	4.72646	4.15946	4.86559	4.83149	5.02486
12917385	NA	NULL	1.91641	2.09279	1.51604	1.72175	1.73821	1.73027	2.03434	1.89929	1.79299	1.56534	1.86967	1.57718	2.03494	1.97265	1.94175	2.13939
12917387	NA	NULL	4.65183	4.87608	4.58414	4.14273	4.36857	4.2652	4.5574	4.85817	3.5858	4.3558	3.05048	3.46419	3.58385	5.09649	4.22862	3.53189
12917389	NA	NULL	5.93518	6.66388	6.3321	5.01877	4.21541	4.90399	5.77585	6.30503	4.71979	5.9366	3.71452	5.45233	4.96697	5.50227	4.78162	6.55274
12917391	NA	NULL	2.43562	3.02572	1.89175	2.06337	2.27757	2.3648	2.14388	2.54587	2.16308	2.36118	1.98968	2.36478	2.5538	2.11885	2.52795	2.43712
12917393	NA	NULL	6.10721	7.02099	4.88758	4.97908	4.94555	4.74373	6.52132	5.60694	4.84983	5.76068	5.62376	4.72502	5.33156	5.56309	6.0346	6.1531
12917395	NA	NULL	4.21034	3.21106	3.50057	2.7577	3.12576	3.15227	3.00539	4.16416	2.72545	3.00451	2.84234	2.93785	3.53298	4.36376	4.45831	5.37094
12917397	NA	NULL	2.60921	2.63174	2.26269	3.05222	2.19212	2.3848	2.58617	2.5068	3.05583	2.35769	2.61424	2.79769	3.27898	2.34419	2.41017	1.81048
12917399	NA	NULL	2.64895	2.72585	2.73947	2.55073	2.28368	2.56466	2.30285	2.96728	2.51661	2.25772	2.30817	2.47225	3.07573	3.16387	3.14365	2.88535
12917401	NA	NULL	1.8715	1.73132	1.5078	1.65251	1.68832	1.66827	2.16644	1.71299	1.67661	1.65685	1.63655	1.66875	1.97963	1.55049	1.94545	1.78762
12917403	NA	NULL	2.7655	3.33922	2.30658	2.92276	2.85473	3.25027	3.15946	3.98916	2.37716	3.43866	4.12246	3.01271	3.05314	2.6146	3.11687	3.33899
12917405	NA	NULL	4.61342	5.37431	4.63649	4.53584	4.32755	4.54589	4.54632	5.2876	3.86897	4.81441	4.13122	4.70394	3.58768	3.2215	3.55596	2.65556
12917407	NA	NULL	1.74451	2.48332	2.0595	1.66571	1.80665	1.74608	2.51674	1.80555	1.80906	1.49089	1.59376	1.44163	1.6153	1.92379	1.78927	1.94508
12917409	NA	NULL	3.96521	4.23255	3.83053	4.80322	3.85988	3.84168	4.0841	3.99519	3.21029	3.83462	4.70497	3.44975	4.02906	3.46499	3.87313	3.74908
12917411	NA	NULL	2.20736	2.55347	2.74693	2.21834	1.59495	2.22942	2.71942	2.88594	2.58005	2.11661	2.33842	1.94542	3.7609	4.01637	4.49285	2.52867
12917413	NA	NULL	4.47651	5.13914	4.56027	5.79406	4.80544	5.14758	4.7615	4.40192	3.92341	5.35521	4.5133	5.48543	5.34614	4.91834	5.54069	4.41715
12917415	NA	NULL	3.74578	3.83646	3.26901	4.01777	3.57095	4.20397	3.64356	4.18757	2.92106	3.44752	3.75687	3.80626	4.69027	3.39576	3.99877	3.64452
12917417	NA	NULL	1.7287	2.41002	1.78919	1.64402	1.96054	2.04299	2.0433	2.47245	2.36354	2.38198	1.93696	2.07563	2.67426	2.2597	2.08037	2.12974
12917419	NA	NULL	2.55747	2.644	2.60381	2.80876	2.34547	2.01528	3.38154	2.22254	2.66654	2.82768	1.90866	2.93225	3.71945	2.86099	2.99448	3.67406
12917421	NA	NULL	1.98908	1.92457	1.79147	1.76213	2.02492	2.0128	2.00483	1.83368	2.00066	1.78187	2.25906	1.68436	1.82061	2.07972	1.62923	1.80522
12917423	NA	NULL	3.39813	3.87889	3.83139	3.54808	3.65454	3.14447	3.64568	3.15413	3.71428	3.21865	2.02599	2.88519	2.68158	3.6754	3.93178	3.03243
12917425	NA	NULL	4.82649	5.02196	4.87416	5.54619	4.85788	4.69402	5.20012	4.53531	4.7809	4.73354	4.92667	4.60987	3.7802	4.54241	4.27783	4.7573
12917427	NA	NULL	4.51934	4.47469	4.88992	5.39011	4.15618	4.49443	4.36933	4.6422	3.92017	4.62751	5.2299	4.802	6.1677	6.77764	6.90516	6.23594
12917429	NA	NULL	1.53639	1.81	1.82512	1.74522	1.66384	1.57674	2.01433	2.09165	1.81835	1.63525	2.01353	1.68858	2.08385	1.6055	2.05226	1.87075
12917431	NA	NULL	1.92382	1.80211	1.57551	2.00611	2.06829	1.82526	1.99568	1.79382	1.78835	1.62685	2.62003	1.69668	1.50106	1.82611	1.71052	2.06386
12917433	NA	NULL	4.056	4.24716	3.57332	2.83164	4.18636	3.86329	4.48606	4.94704	3.39553	4.22785	3.2956	3.29463	4.16564	4.02125	3.79394	3.75724
12917435	NA	NULL	2.82406	3.66216	2.16999	1.89348	3.60759	2.32139	3.34583	3.08336	2.22892	3.49253	1.80642	2.44662	2.37939	2.77239	2.2172	3.79964
12917437	NA	NULL	2.20607	2.3467	2.3316	1.71536	2.31348	1.78791	2.8135	1.92131	2.82922	4.26495	1.82252	2.51608	1.56066	1.97558	1.5756	1.92245
12917439	NA	NULL	1.78162	1.68253	2.17535	1.92278	1.99877	1.62328	1.81802	1.93093	1.4592	1.51228	2.40655	1.81837	2.03357	2.03572	1.85842	2.13912
12917441	NA	NULL	7.38836	6.50229	8.82442	8.83485	6.20407	6.01099	5.71933	7.20267	6.76904	6.59833	8.33098	7.69313	6.02802	5.50942	5.48325	6.5521
12917443	NA	NULL	1.96143	2.58553	2.16261	1.71536	2.19229	2.28128	1.90184	2.1941	1.83777	2.14171	1.94513	1.87889	2.02102	2.6275	2.43621	2.12846
12917445	NA	NULL	3.23867	3.48576	3.17739	3.36555	2.61675	3.2001	2.82153	3.30149	2.87611	2.92811	2.72645	2.93893	3.53336	4.50154	3.88257	3.10038
12917447	NA	NULL	4.15978	4.36244	4.77045	4.6224	4.60773	3.85508	3.99865	3.92374	3.82522	4.42758	4.98443	4.53336	4.33843	2.77348	3.75868	4.6665
12917449	NA	NULL	2.30501	2.5366	2.73765	2.26467	2.42354	2.57278	2.37186	2.21831	2.6043	1.97718	2.3032	1.89849	2.8952	2.84171	2.2756	2.88546
12917451	NA	NULL	3.17978	3.33678	2.64747	3.31816	2.45934	2.7199	2.796	3.21469	2.95427	3.15901	2.70214	3.25678	2.67508	3.06509	2.83985	2.57943
12917453	NA	NULL	2.10375	1.9015	1.9694	2.03114	1.95303	1.72368	1.90117	1.63	2.01209	2.26737	2.27204	2.10202	3.61437	2.22443	2.43132	2.09932
12917455	NA	NULL	3.27217	2.97377	3.61586	3.87442	2.53915	2.90616	3.44379	3.54878	3.30249	2.70779	3.05979	3.41024	3.7156	4.15963	4.86854	4.51067
12917457	NA	NULL	3.63799	3.2054	2.93294	3.56506	3.13521	3.2054	2.68939	2.82836	3.67597	3.35215	4.20891	3.57904	3.39138	3.20237	2.65888	4.22274
12917459	NA	NULL	1.88915	2.06648	1.55836	1.91728	1.82501	1.76448	1.87465	1.6761	1.86519	2.283	1.76566	1.61375	1.64175	1.8951	1.88561	1.77352
12917461	NA	NULL	1.543	1.92662	1.77057	1.63047	1.69913	1.58485	1.83736	1.97535	1.79114	1.54897	1.5808	1.47471	2.1129	2.10362	1.95725	2.14393
12917463	NA	NULL	2.09498	1.61269	2.117	1.80842	1.48552	1.43518	2.13956	1.91604	1.44187	1.69929	1.7749	1.7673	1.65149	1.79983	2.03852	3.04421
12917465	NA	NULL	3.74839	3.39489	2.70617	3.50216	2.48768	3.03954	4.23781	2.71132	3.04909	3.32607	4.18898	2.72034	2.94244	2.23632	2.53466	1.95159
12917467	NA	NULL	2.64338	2.6489	2.95559	2.85975	2.72728	2.53735	3.31184	3.15007	3.30164	2.71335	3.07545	3.17731	4.09667	3.87306	3.85125	3.5957
12917469	NA	NULL	1.83335	1.82081	1.88844	1.70445	2.01638	2.3046	2.03979	1.91998	1.776	2.03834	1.72197	1.82085	2.13935	2.86063	2.90148	2.38864
12917471	NA	NULL	3.00472	2.6303	4.30881	3.08566	2.49251	2.75017	3.07519	2.41953	2.90833	2.94561	2.99853	3.66861	3.1707	2.56458	4.11095	4.05561
12917473	NA	NULL	4.07949	4.42345	4.59813	4.25914	3.38996	4.42576	3.88051	3.46839	4.09363	4.27865	5.50698	3.89098	5.84907	4.90915	5.62836	4.75506
12917475	NA	NULL	1.88699	1.60988	1.74358	1.56121	1.71435	1.67825	1.64781	1.65954	1.71321	1.98356	1.71354	1.74829	1.99911	2.32666	1.97815	2.1499
12917477	NA	NULL	4.00633	3.33892	3.67432	3.35942	3.37555	4.29961	3.08826	3.75664	3.77068	3.14393	2.6077	2.84048	4.70558	4.70828	3.78979	5.09645
12917479	NA	NULL	2.33072	2.33752	3.17457	3.08237	1.83182	2.10795	1.67228	2.02286	2.02471	1.96492	2.66104	2.89878	3.82626	4.90303	4.42337	5.57955
12917481	NA	NULL	2.57264	2.38043	2.11348	2.08948	2.06774	2.05128	2.40402	2.24691	2.13535	2.48395	2.15933	1.91086	3.21031	2.32357	3.00595	4.13491
12917483	NA	NULL	1.71667	1.71776	1.69372	1.59509	2.05517	1.61746	1.91234	1.43242	1.69936	1.66437	1.49673	1.58794	1.66198	2.04041	1.81551	1.84326
12917485	NA	NULL	2.99322	2.55577	2.75813	3.18827	2.57108	2.43913	2.37286	2.87056	2.33677	2.22411	2.20669	2.12995	4.75248	4.26256	4.27064	4.50258
12917487	NA	NULL	2.05877	2.42715	2.4806	2.41075	2.35965	2.14956	2.66219	2.70346	2.30148	2.07717	2.01697	2.34511	3.56548	2.47837	3.5294	4.25626
12917489	NA	NULL	2.04644	2.40635	2.3195	2.86503	1.78691	2.01267	2.60074	2.32333	2.00391	1.96721	1.88083	2.42347	3.20758	2.44406	3.6254	3.23336
12917491	NA	NULL	2.80451	3.2636	2.76535	2.74201	2.53653	3.01017	2.43079	3.05184	2.1661	2.08686	3.01456	2.6352	3.37737	2.67227	3.29798	4.10325
12917493	NA	NULL	2.66036	2.60376	2.0372	2.01235	2.01246	2.57959	1.97517	2.37779	2.21466	2.12307	2.05554	2.00338	1.99757	2.0817	2.06993	1.99286
12917495	NA	NULL	5.17189	4.25253	5.67262	4.72794	5.15523	5.31752	5.29566	3.95138	5.24546	4.24527	6.00786	5.75896	4.37458	4.53449	4.38126	5.43882
12917497	NA	NULL	2.8558	3.04786	2.71864	2.85414	2.87663	3.00457	3.62919	2.84023	2.49298	2.82108	2.33936	2.88898	2.83145	3.3182	3.51225	2.81566
12917499	NA	NULL	2.45114	2.43941	1.94496	1.80105	2.08561	2.71496	2.96129	2.60295	2.28463	2.21368	2.28638	2.36434	2.81282	3.74156	2.61451	2.25683
12917501	NA	NULL	1.86607	1.93709	2.23439	1.65339	1.6326	2.1832	2.48411	2.21731	1.64279	1.94486	2.07562	1.93095	3.15573	2.98931	2.26555	2.00424
12917503	NA	NULL	4.66665	5.11526	4.64726	5.0744	5.03653	4.71068	4.23136	4.6933	4.68087	4.46069	5.15545	4.83465	4.72987	5.11914	5.30254	4.73286
12917505	NA	NULL	3.93423	4.03494	3.79385	3.11616	3.48413	3.72011	3.97257	4.41149	2.97697	3.423	2.1009	2.90349	5.40255	4.87424	4.47838	5.24329
12917507	NA	NULL	5.08882	5.55511	5.85361	5.26439	4.31849	5.21938	4.97801	4.89265	2.91015	4.67277	3.95762	4.42919	4.70558	4.27434	6.18965	5.29171
12917509	NA	NULL	2.10557	2.50721	2.23646	2.9954	2.18883	2.2967	2.42405	2.86153	3.19017	2.61456	1.85888	1.76627	2.98253	2.6261	2.56544	2.2662
12917511	NA	NULL	2.89699	2.75602	2.96188	3.66076	2.60051	2.98866	2.9341	3.23103	2.44268	2.70775	1.72842	3.34085	3.31018	3.87043	3.2921	3.18916
12917513	NA	NULL	1.67619	2.02992	1.54959	1.66571	1.6312	1.72068	1.94381	1.65652	1.75996	1.91212	1.54085	1.59205	1.73966	1.9632	1.80735	1.67388
12917515	NA	NULL	2.55152	2.59304	2.47829	3.31572	2.12493	1.75475	2.12349	2.54984	2.23985	2.56945	1.95022	2.66668	3.71675	2.95307	2.83458	3.05849
12917517	NA	NULL	1.7257	1.50487	1.63047	1.48079	1.65299	1.7554	1.74877	1.63496	1.63752	1.71895	1.42401	1.69968	1.6132	2.0474	1.52309	2.22159
12917519	NA	NULL	3.59795	3.73761	4.87886	5.76622	3.74773	3.57345	3.80572	3.49075	3.65793	3.50246	4.69022	4.3314	4.17967	4.72831	3.90629	4.41555
12917521	NA	NULL	1.88587	1.9735	1.88321	1.82305	1.83055	1.72588	2.04337	1.94092	1.90082	1.80887	2.05452	1.85357	2.02405	2.10954	2.57023	1.86858
12917523	NA	NULL	2.03276	2.14464	3.02329	3.10835	1.96407	2.17185	2.23304	1.94309	2.11046	1.91774	2.64503	2.09763	4.12858	2.55316	4.3885	3.98603
12917525	NA	NULL	2.17813	1.88409	1.86277	1.62648	2.1045	1.78613	1.8545	1.85461	1.83889	1.91424	1.43674	1.63836	2.16903	1.65466	1.73861	1.84855
12917527	NA	NULL	4.95301	4.85304	4.9918	5.62999	4.55415	4.91503	4.66266	4.82492	5.13212	4.60015	4.75475	4.57232	5.47232	5.86684	5.5852	5.39517
12917529	NA	NULL	5.22342	5.88414	5.83437	4.86908	4.88397	4.85441	5.86751	5.93534	4.59737	4.76746	4.16647	4.93978	5.52673	5.66419	5.20178	6.3503
12917531	NA	NULL	5.21163	6.13954	5.24682	6.11958	5.64474	5.75915	5.83305	6.49058	5.31089	5.50426	6.04225	7.1421	5.59447	6.76944	6.22071	5.26709
12917533	NA	NULL	1.54867	1.80634	1.82142	1.59721	2.28439	1.57688	1.66526	1.72983	1.63741	1.66218	1.77773	1.50531	1.76217	1.54693	1.47783	1.68265
12917535	NA	NULL	2.60062	2.32545	2.38508	2.80423	3.27371	2.48367	3.4528	2.79245	2.75756	2.86849	2.04869	2.46153	2.37275	2.18558	2.21386	3.05798
12917537	NA	NULL	2.30686	2.89617	3.27078	2.9896	2.67754	2.84286	3.08733	2.75936	3.19084	3.35031	2.87157	2.57374	2.15891	2.72147	3.15272	2.67117
12917539	NA	NULL	3.41034	3.64732	5.45294	4.43294	4.78446	4.77474	4.81559	3.50072	4.56269	4.35147	4.07383	5.04402	4.9277	4.76411	4.93997	4.69011
12917541	NA	NULL	4.58039	4.39442	8.41815	8.89564	5.2698	4.97186	5.4666	4.641	5.06248	5.2733	7.36947	7.8834	6.02398	5.02202	6.72882	6.20083
12917543	NA	NULL	2.16068	2.53309	3.3669	2.53622	3.04058	3.1865	2.55636	2.59993	2.76175	2.60635	4.16109	3.40929	3.32073	4.29443	3.64428	3.48556
12917545	NA	NULL	5.29722	5.62771	3.4817	4.12663	5.30257	5.27412	5.51858	5.91024	4.94243	6.39069	3.26394	4.2476	5.39067	4.6737	5.04606	4.90395
12917547	NA	NULL	1.85201	2.74538	2.08235	1.90145	2.2691	2.74048	1.91609	2.63797	1.80666	2.07394	1.94012	2.13513	2.65318	2.03596	2.47908	2.30271
12917549	NA	NULL	3.16	3.11737	2.91996	3.42518	3.04937	2.54348	4.11643	3.52101	3.39569	3.16321	4.47915	3.88387	3.80659	3.58356	3.45503	3.11432
12917551	NA	NULL	2.99313	3.89728	2.89366	2.90799	4.23263	4.07829	4.54482	3.38124	3.39284	3.99036	3.57744	4.01497	3.74722	4.05787	3.5297	3.84289
12917553	NA	NULL	5.52085	5.3004	6.26006	6.80466	4.80679	4.94526	6.49933	5.10542	5.25903	5.39433	5.65844	5.878	5.24588	5.30259	5.68624	6.00092
12917555	NA	NULL	2.65505	2.95412	1.90162	2.11903	2.80996	2.36641	3.27369	2.45583	3.49495	2.85693	1.84767	2.84389	2.59449	3.57944	3.0868	2.81608
12917557	NA	NULL	2.82846	2.10736	2.55265	2.89768	1.98399	2.28563	2.81412	2.62356	2.65551	2.00854	4.42623	2.64953	3.10773	3.35205	3.22759	2.92208
12917559	NA	NULL	2.35091	1.49697	2.23218	2.13233	1.73363	1.83422	2.31591	2.04335	2.36419	1.90076	2.17636	2.01877	2.2211	2.62616	3.7321	2.28996
12917561	NA	NULL	1.95524	2.24015	4.49976	3.43323	2.7484	3.02768	2.34944	4.07267	3.29023	2.93826	2.06136	2.72144	4.77965	4.56778	5.12068	3.94702
12917563	NA	NULL	3.0521	2.47771	1.99275	1.95396	1.99143	1.99678	2.67216	1.95982	2.60671	2.4553	2.11406	1.88588	2.93825	2.95975	2.94796	3.69625
12917565	NA	NULL	1.96792	2.08694	2.97806	2.67495	2.0695	2.24566	2.43932	2.88076	2.55846	2.52064	2.59761	2.53796	2.21586	2.47219	2.50958	2.74408
12917567	NA	NULL	1.7002	1.67506	1.59269	1.80459	1.62593	1.67042	2.10816	1.4993	1.6434	1.59253	1.55884	1.63951	1.71279	1.80961	1.69272	1.63804
12917569	NA	NULL	6.39179	4.74708	6.08178	5.91905	4.89583	5.01927	4.39601	5.1992	6.38863	4.76557	4.65278	5.32249	5.1572	5.36287	5.87943	4.75521
12917571	NA	NULL	2.26096	1.91519	2.32806	2.6456	2.05623	1.96585	2.06506	2.22588	1.83589	1.85217	1.93404	2.86061	2.39489	2.55156	2.39802	3.31727
12917573	NA	NULL	3.99309	4.07282	5.85946	4.40237	3.04588	3.82093	3.13773	3.86329	4.29398	3.6889	4.90514	5.8676	4.94351	3.66277	4.55838	4.90303
12917575	NA	NULL	3.12427	3.55801	3.30167	4.48006	3.96817	4.42412	3.72151	4.21145	4.13211	3.97775	3.78183	4.09328	3.27596	3.38489	3.52803	4.19383
12917577	NA	NULL	6.82798	6.48525	8.86016	8.2908	6.6765	7.00752	7.38198	6.11243	7.50671	6.85433	7.78497	8.08743	8.5508	7.72349	7.92658	7.77384
12917579	NA	NULL	4.30064	4.31205	4.23188	3.65884	4.55024	4.28358	4.73185	3.71535	4.5469	4.00298	3.87079	4.57694	4.40133	4.48411	4.3742	4.59104
12917581	NA	NULL	5.01955	5.20605	4.57179	3.98943	3.49352	4.36996	6.00968	4.88287	5.34083	5.04156	4.52371	5.03334	6.08375	5.67634	5.13201	5.45415
12917583	NA	NULL	3.19384	3.16699	3.36916	3.30194	2.02714	2.68564	3.34181	3.40433	3.11537	3.28819	3.37511	3.47184	3.34584	3.50165	3.24697	4.39839
12917585	NA	NULL	3.96352	2.91681	4.99632	4.037	2.15134	3.52508	3.41454	2.52982	3.96582	2.75266	3.95521	4.09212	3.48201	2.88974	3.7098	3.05585
12917587	NA	NULL	2.31817	2.46804	1.99799	2.81676	2.44705	2.21992	2.7368	2.58847	2.60835	2.37636	2.18111	2.45647	2.99306	2.52645	3.42573	2.7587
12917589	NA	NULL	1.66175	1.48244	1.57426	1.45962	1.83685	1.74935	1.64048	1.55315	1.68451	1.83131	1.6101	1.58809	2.13904	1.85472	2.48053	1.80815
12917591	NA	NULL	3.37829	3.02662	3.97542	4.67668	3.21687	3.93799	3.52014	3.05597	3.6558	2.86405	3.77332	3.62518	3.50609	3.69728	3.43319	4.10203
12917593	NA	NULL	2.97133	3.36973	3.39497	3.1882	2.65985	2.45843	3.39221	3.13584	3.12896	3.06958	2.3685	3.37673	3.7129	3.16798	4.05573	3.82049
12917595	NA	NULL	2.12402	2.21971	2.52872	2.26802	2.33805	2.51608	2.61439	1.89301	2.20896	2.11515	2.67224	2.38185	2.24744	2.32666	2.02671	2.93684
12917597	NA	NULL	4.86108	4.33851	6.16621	5.639	4.72321	4.58213	4.59946	4.80761	4.60554	4.0397	5.23579	4.95188	5.52597	5.14897	4.54289	5.31704
12917599	NA	NULL	3.36584	4.33363	3.80466	2.89306	4.3847	4.38621	5.25919	4.7799	4.18782	4.18356	2.70767	2.92469	2.94435	3.69077	3.92595	4.08341
12917601	NA	NULL	4.01948	4.85232	3.99171	3.5717	3.98255	3.52064	4.55829	4.46499	4.7655	4.77045	4.14679	2.13883	4.6334	3.30405	3.87432	4.57469
12917603	NA	NULL	4.17721	3.88422	3.80816	3.90545	3.65513	3.2988	4.25756	4.34299	4.12023	4.11804	2.55442	3.96259	5.01261	4.75442	4.50758	5.15753
12917605	NA	NULL	2.66736	2.69367	1.90044	2.54366	2.51722	3.06705	2.62418	3.14931	2.9554	3.00297	2.01886	2.29104	3.62467	2.76541	2.35764	3.16513
12917607	NA	NULL	3.84004	4.57659	2.14639	2.83953	3.76541	4.02684	3.80783	4.43748	4.36867	4.16459	2.77373	3.09831	4.17877	4.6252	4.23028	4.99765
12917609	NA	NULL	3.19384	3.16699	3.36916	3.30194	2.02714	2.68564	3.34181	3.40433	3.11537	3.28819	3.37511	3.47184	3.34584	3.50165	3.24697	4.39839
12917611	NA	NULL	3.96352	2.91681	4.99632	4.037	2.15134	3.52508	3.41454	2.52982	3.96582	2.75266	3.95521	4.09212	3.48201	2.88974	3.7098	3.05585
12917613	NA	NULL	2.31817	2.46804	1.99799	2.81676	2.44705	2.21992	2.7368	2.58847	2.60835	2.37636	2.18111	2.45647	2.99306	2.52645	3.42573	2.7587
12917615	NA	NULL	1.66175	1.48244	1.57426	1.45962	1.83685	1.74935	1.64048	1.55315	1.68451	1.83131	1.6101	1.58809	2.13904	1.85472	2.48053	1.80815
12917617	NA	NULL	3.37829	3.02662	3.97542	4.67668	3.21687	3.93799	3.52014	3.05597	3.6558	2.86405	3.77332	3.62518	3.50609	3.69728	3.43319	4.10203
12917619	NA	NULL	2.97133	3.36973	3.39497	3.1882	2.65985	2.45843	3.39221	3.13584	3.12896	3.06958	2.3685	3.37673	3.7129	3.16798	4.05573	3.82049
12917621	NA	NULL	2.12402	2.21971	2.52872	2.26802	2.33805	2.51608	2.61439	1.89301	2.20896	2.11515	2.67224	2.38185	2.24744	2.32666	2.02671	2.93684
12917623	NA	NULL	4.86108	4.33851	6.16621	5.639	4.72321	4.58213	4.59946	4.80761	4.60554	4.0397	5.23579	4.95188	5.52597	5.14897	4.54289	5.31704
12917625	NA	NULL	3.36584	4.33363	3.80466	2.89306	4.3847	4.38621	5.25919	4.7799	4.18782	4.18356	2.70767	2.92469	2.94435	3.69077	3.92595	4.08341
12917627	NA	NULL	4.01948	4.85232	3.99171	3.5717	3.98255	3.52064	4.55829	4.46499	4.7655	4.77045	4.14679	2.13883	4.6334	3.30405	3.87432	4.57469
12917629	NA	NULL	4.17721	3.88422	3.80816	3.90545	3.65513	3.2988	4.25756	4.34299	4.12023	4.11804	2.55442	3.96259	5.01261	4.75442	4.50758	5.15753
12917631	NA	NULL	2.66736	2.69367	1.90044	2.54366	2.51722	3.06705	2.62418	3.14931	2.9554	3.00297	2.01886	2.29104	3.62467	2.76541	2.35764	3.16513
12917633	NA	NULL	3.84004	4.57659	2.14639	2.83953	3.76541	4.02684	3.80783	4.43748	4.36867	4.16459	2.77373	3.09831	4.17877	4.6252	4.23028	4.99765
12917635	NA	NULL	1.99963	3.15234	2.67015	2.36072	2.73655	2.44926	3.87414	2.68947	1.79634	2.78397	2.0496	2.20333	2.58414	2.63797	2.56815	2.71038
12917637	NA	NULL	5.29186	5.25399	5.63959	5.68523	4.74236	4.54441	5.20297	4.16456	3.95854	4.96448	4.6	5.21708	4.71254	5.5838	4.99638	5.42883
12917639	NA	NULL	4.31159	4.43458	3.63866	4.27998	3.66692	3.70967	4.66671	4.4304	3.95475	4.68353	4.27872	4.38813	4.09647	4.53755	3.86152	3.29408
12917641	NA	NULL	2.25366	1.83459	2.14158	1.69561	2.15675	1.65201	2.6278	1.85907	2.15364	1.88124	2.16454	2.00737	2.01594	1.59064	1.94703	2.06578
12917643	NA	NULL	2.53412	2.4132	2.60129	2.46607	2.23463	2.15374	3.1297	2.58756	2.11062	2.52632	3.01331	2.56986	1.83474	1.84117	2.46644	2.4898
12917645	NA	NULL	3.23061	2.99862	2.48238	2.7563	1.72339	2.26514	3.32053	2.56878	2.38814	3.23668	2.73906	2.21914	2.30724	2.16619	2.26452	2.30232
12917647	NA	NULL	3.94091	3.55537	3.9532	3.07512	3.73923	3.36646	3.20915	3.1413	3.54021	2.51605	3.77094	3.98904	3.35259	3.31167	3.54998	3.77112
12917649	NA	NULL	3.08912	3.36175	2.6255	2.81932	3.0298	2.79641	3.48951	2.85003	3.54965	2.77007	3.49526	2.90493	3.62106	3.00465	3.31565	3.52822
12917651	NA	NULL	3.37494	3.51168	2.82849	3.4964	4.00301	4.06873	3.67961	4.05551	3.70103	3.00634	2.62843	3.68621	2.71533	2.73919	2.37521	3.87975
12917653	NA	NULL	1.73187	1.60226	2.14704	2.05675	1.80343	1.72361	1.87592	1.35635	1.88876	1.50315	1.91456	1.76295	2.02407	1.86674	2.29951	2.52965
12917655	NA	NULL	1.80935	1.8408	1.75562	1.59229	2.07847	1.93894	2.48628	1.753	1.86771	1.91561	1.99116	1.80723	2.18343	2.24339	1.72117	1.8251
12917657	NA	NULL	5.8206	4.98019	5.86557	5.97212	4.94705	5.11313	5.09713	5.06648	5.54072	4.60877	5.8989	5.56407	4.70263	4.24917	4.47209	4.30519
12917659	NA	NULL	1.75055	1.83136	1.67786	1.69653	1.45181	1.48397	1.74832	1.74566	1.73885	1.66111	1.63221	1.56175	1.71602	1.45339	1.63221	1.89784
12917661	NA	NULL	2.05705	2.15099	1.7855	1.96531	1.71829	1.72672	2.63514	1.99851	1.87948	1.81477	1.91653	2.13115	1.96352	2.1324	1.86279	2.40931
12917663	NA	NULL	1.9444	1.80295	2.13164	2.4789	1.64546	2.5421	1.92797	2.53384	2.37942	1.679	1.6494	2.22834	2.72861	2.44966	3.07789	2.96786
12917665	NA	NULL	2.1966	2.70891	2.94443	3.28776	2.09481	2.13027	2.37633	1.65647	2.49077	2.8455	2.40187	3.38741	5.0967	4.66354	4.99432	5.46271
12917667	NA	NULL	2.80185	2.44745	2.77265	2.87701	2.56132	2.59295	2.37004	2.12567	2.77167	2.65483	2.63028	3.16855	3.34808	3.00981	3.58382	3.50232
12917669	NA	NULL	2.14106	2.27063	2.03338	2.53775	2.75551	2.19145	1.84498	2.34965	2.25459	1.96466	3.11958	2.43357	2.29904	3.2694	2.58574	2.50704
12917671	NA	NULL	1.76117	1.84857	2.03854	1.67808	1.61433	1.61293	2.0317	2.53178	1.65148	1.80835	1.61641	1.79856	1.9284	2.53451	2.17396	2.41073
12917673	NA	NULL	2.18237	2.56521	2.9316	2.17167	2.73699	2.38413	2.72757	2.44694	2.31235	2.30681	2.11954	2.362	2.5205	2.81463	2.83648	3.00888
12917675	NA	NULL	2.00421	1.70546	2.26167	1.84215	1.83082	1.80399	2.42215	2.27652	1.71835	2.21362	1.61861	2.05236	2.43071	2.69607	2.44638	2.62297
12917677	NA	NULL	3.36601	4.05075	4.76943	4.78986	3.60905	3.53293	4.38236	3.92578	3.98371	3.50992	4.48611	4.43766	5.04853	4.37299	4.41767	4.58114
12917679	NA	NULL	3.23536	3.14428	2.85698	3.26921	2.50051	3.24761	4.15774	4.12712	4.02013	3.43032	4.24835	3.63605	3.81226	3.66098	2.9686	3.84444
12917681	NA	NULL	4.47602	4.85031	2.83369	4.04596	3.61006	4.36751	4.06856	4.79024	3.75197	4.55394	2.92585	3.65881	3.83871	3.75929	3.37465	3.30611
12917683	NA	NULL	2.48094	2.95521	2.1194	3.50647	2.37511	2.34835	2.83563	2.70961	2.38609	2.20589	3.40848	2.10485	1.9117	2.85592	1.9328	2.24731
12917685	NA	NULL	3.37693	3.3528	3.04403	2.76691	3.34052	3.17763	3.26268	3.15259	3.96402	3.70026	2.33919	2.67666	3.66622	3.19815	3.27556	3.31413
12917687	NA	NULL	4.78687	5.81581	5.57693	5.35139	4.29225	4.49562	4.65181	5.49878	4.77077	5.42133	4.30132	4.19646	5.30766	5.50734	4.22192	5.2836
12917689	NA	NULL	6.25827	6.17094	6.74434	6.5043	4.95243	5.58229	5.74673	6.03718	6.05165	6.56497	6.04464	6.24383	6.22338	6.1269	6.18722	5.86161
12917691	NA	NULL	3.61771	3.91836	4.15773	3.58983	3.42469	3.77741	3.56645	3.39166	2.81774	3.5783	3.06588	3.64906	4.6195	4.20424	3.83865	3.98418
12917693	NA	NULL	2.06097	3.26172	2.66362	2.74908	2.35354	2.42276	2.74356	2.43018	2.47606	2.47657	2.45918	2.45944	2.79385	2.06537	2.23731	2.70379
12917695	NA	NULL	4.24244	4.51733	3.38023	3.30194	3.10358	4.38068	4.40386	4.46148	4.39542	3.7355	2.17529	3.74131	4.33185	4.16909	4.20773	4.40535
12917697	NA	NULL	2.66912	1.85153	2.32961	2.46301	2.22184	2.35777	1.67353	1.7812	1.88136	2.25972	2.04188	1.66256	1.92842	3.22504	1.66127	1.6254
12917699	NA	NULL	4.84459	4.90345	5.36966	4.5452	3.79897	4.43297	4.38232	4.48992	4.54143	4.47954	4.82727	5.02351	4.62766	4.71671	4.60646	5.08807
12917701	NA	NULL	7.5072	7.84716	9.48707	9.59263	7.36413	7.23753	7.52543	7.69354	7.29556	7.72104	9.13642	9.00501	9.07668	9.48582	8.66822	9.42514
12917703	NA	NULL	4.9436	5.24116	5.42988	4.44109	4.808	5.19987	5.38356	5.27371	4.09747	5.40033	4.58598	5.03696	5.93414	4.74588	5.25382	4.89885
12917705	NA	NULL	1.89357	2.02321	2.11926	1.99644	1.82938	2.03971	1.74602	2.17609	1.89262	2.07727	1.99511	1.87144	2.34805	2.8086	1.93831	2.2301
12917707	NA	NULL	3.94543	4.29235	5.89755	6.10657	3.2765	3.85294	3.10875	4.28356	3.4929	3.06885	4.57708	5.45878	5.98366	4.7749	5.86899	5.41607
12917709	NA	NULL	1.91327	1.94792	1.8947	1.94387	1.70599	1.61251	1.77952	2.16707	1.82322	1.83546	1.56516	1.80736	2.90267	2.82397	2.32014	3.0551
12917711	NA	NULL	2.19485	2.51109	2.4019	2.19652	2.10906	2.14393	3.00675	2.10576	2.43587	1.85188	2.22566	2.10816	2.33171	2.65179	2.28848	2.01801
12917713	NA	NULL	1.92403	1.83634	2.19739	1.71051	2.01638	1.93658	1.78702	1.67327	1.6657	1.87709	1.6586	1.7614	1.89445	1.92709	2.02006	2.34254
12917715	NA	NULL	2.27603	2.84113	2.29617	2.00393	1.77469	2.06554	2.45885	2.09548	1.84365	2.1885	1.67761	1.96388	2.66218	1.97359	2.36094	2.11891
12917717	NA	NULL	1.86592	1.74001	2.02949	2.0974	1.93825	1.92141	1.79131	1.97599	1.93603	1.49964	1.9342	1.88091	1.87474	1.9267	1.94358	1.98677
12917719	NA	NULL	2.21764	2.22763	2.30043	2.61106	2.28085	2.68388	2.36046	2.3001	1.91827	2.2523	2.02278	2.29143	2.86764	2.9776	3.01744	2.98375
12917721	NA	NULL	2.42565	2.64577	2.91874	2.75118	2.54894	2.58137	2.38378	2.78492	2.69064	2.52178	2.93381	2.19606	2.60721	3.47392	3.35272	2.43274
12917723	NA	NULL	1.55043	1.66883	1.38549	1.51254	1.50472	1.65596	1.72898	1.671	1.53881	1.78469	1.59507	1.65511	1.62678	1.45101	1.47458	1.70547
12917725	NA	NULL	3.87292	3.01621	3.62569	4.53829	4.37137	4.1874	3.93042	3.85928	3.74098	3.2436	4.84252	3.88501	2.9364	3.73487	3.18144	3.32756
12917727	NA	NULL	2.31951	2.29897	2.30495	2.40973	1.76539	2.29256	2.21554	2.07123	1.85221	2.24877	2.17474	1.82638	2.66773	2.92047	2.24886	2.44968
12917729	NA	NULL	3.14224	2.58867	3.73099	2.6629	2.17633	2.16207	2.14804	2.98804	2.2153	2.72532	2.32117	1.97661	3.6052	4.43282	3.69358	4.20557
12917731	NA	NULL	5.1068	6.08975	7.09336	6.34591	5.22114	4.84905	5.75324	6.01649	5.132	5.3256	4.93407	5.12061	5.53934	5.57567	5.91652	5.42143
12917733	NA	NULL	1.86915	2.37771	2.00649	2.13977	1.86769	1.92222	2.16207	2.07734	1.87434	2.22302	2.03758	1.98323	1.8755	2.10211	1.72377	1.75256
12917735	NA	NULL	2.6056	2.35949	2.04798	1.98468	2.21699	2.20087	3.04613	2.34684	2.27277	2.52453	2.04625	2.11013	2.35259	2.10473	2.05704	2.67883
12917737	NA	NULL	2.32049	2.89361	2.21635	3.14119	2.18452	2.49351	3.42241	2.28571	2.53826	2.54464	1.55094	2.63064	2.28165	2.6354	3.25624	3.9754
12917739	NA	NULL	2.75823	1.89701	2.57898	2.17442	2.06265	2.19067	2.97097	1.71022	2.085	1.47928	2.46581	2.29617	2.82869	2.19696	2.39915	3.45643
12917741	NA	NULL	6.13127	5.98948	5.82588	6.14307	5.06641	4.83694	5.86985	5.47832	5.96634	5.8529	5.55282	5.89564	6.58188	6.56922	6.14233	6.90192
12917743	NA	NULL	4.61269	4.37446	4.34858	4.03645	3.23058	3.10308	4.17164	3.74682	4.69486	3.29696	4.57981	3.22322	3.6566	4.17392	4.08225	3.95778
12917745	NA	NULL	2.78057	3.40597	1.96139	2.18733	2.13046	1.89531	2.41776	2.51507	2.36776	3.19579	2.09353	2.36238	2.83401	1.88495	2.48356	2.13954
12917747	NA	NULL	2.20618	1.691	1.96539	2.90855	1.66818	1.90949	1.90048	1.60183	2.04863	1.79685	1.60002	1.91396	2.28457	2.00096	2.17951	2.26352
12917749	NA	NULL	5.05723	5.66331	5.30476	5.59427	4.49666	5.05684	6.16852	5.15092	5.83102	5.50364	2.93034	5.61845	6.26777	5.57029	6.06105	5.50545
12917751	NA	NULL	3.67427	4.14303	3.9182	4.31306	4.70742	4.00383	4.1769	3.70979	4.49299	4.4571	4.43962	4.36692	4.16328	4.05984	3.72181	4.16064
12917753	NA	NULL	4.45139	4.41266	6.01685	5.43207	4.60479	5.31977	4.39372	4.89381	4.67565	4.46888	4.57028	5.45824	4.41155	5.38118	5.41146	5.2334
12917755	NA	NULL	3.35618	2.85608	4.43714	5.09303	2.94137	3.71795	4.02745	3.43982	3.75409	3.08318	3.93631	4.28418	4.68284	5.42235	4.40946	5.43833
12917757	NA	NULL	2.01258	1.87696	2.63119	2.51649	1.90861	1.98737	1.71876	1.8146	2.03038	1.76959	1.70084	2.1298	2.51398	2.06788	2.32521	2.81413
12917759	NA	NULL	2.03968	1.94332	1.73368	1.54952	2.87703	2.64801	2.27505	2.26925	2.72081	2.52985	2.38496	1.66682	2.19884	2.17396	1.89634	1.84693
12917761	NA	NULL	3.1411	3.6049	2.87771	2.66369	3.1835	2.55681	3.5254	3.88468	3.38315	3.58977	3.07837	3.23958	4.07844	4.72123	3.54277	3.91036
12917763	NA	NULL	5.16185	5.50019	4.38369	4.50643	4.32144	4.1916	4.98698	5.37458	4.74973	4.52417	5.28968	4.82829	5.35358	4.50342	5.08913	5.74585
12917765	NA	NULL	3.99788	3.81485	3.89892	4.27757	2.10131	2.9905	3.13524	4.76854	3.2874	3.91169	3.37745	3.9351	2.57015	3.51583	3.66453	3.58822
12917767	NA	NULL	3.47235	4.10718	2.92276	2.39648	2.76401	2.67214	3.15172	4.07481	3.35899	3.42844	2.70827	2.66925	2.82371	2.84824	3.34092	2.49421
12917769	NA	NULL	3.15209	4.14557	4.22396	3.65943	4.21612	3.1287	4.17125	4.12067	3.48147	3.18587	4.5331	3.45157	4.74483	5.16151	4.36302	4.86757
12917771	NA	NULL	6.04472	6.15623	6.66141	6.75062	6.81824	6.47962	5.78767	5.54359	5.35877	5.58001	6.81059	5.99735	4.96574	4.10901	3.99404	5.17065
12917773	NA	NULL	2.54169	2.67101	2.031	2.75863	2.55295	3.02701	2.6468	2.39538	2.58642	2.37181	3.82363	2.56126	2.18101	2.16284	1.92873	1.75927
12917775	NA	NULL	3.07521	3.18142	4.18903	4.81416	3.22687	2.35566	2.86823	3.02132	3.33967	2.24615	4.1341	4.33895	4.32737	5.23132	3.94552	4.63092
12917777	NA	NULL	4.67381	5.25659	4.03943	3.94114	3.92776	4.14399	3.71376	5.08834	4.87825	4.38011	4.17529	4.16898	4.2069	4.82799	5.58938	3.74939
12917779	NA	NULL	4.27238	4.78116	4.93917	3.4881	3.45867	3.67196	4.13319	4.99205	4.44665	3.9293	2.97784	4.62592	5.02992	5.14897	4.96161	5.208
12917781	NA	NULL	5.52523	6.02716	6.75987	7.5137	5.18934	5.39077	5.52963	6.01661	5.56042	5.76725	5.31942	6.74881	6.87199	7.13576	6.68337	7.65913
12917783	NA	NULL	3.2287	3.15565	2.53183	2.70588	3.05684	3.76093	3.6703	3.23604	2.60108	3.00974	3.49608	3.26869	3.4017	4.66489	3.6592	3.55471
12917785	NA	NULL	2.0839	1.70138	1.4351	1.47428	1.8869	1.79399	1.68875	3.02483	1.71584	3.25262	1.82288	1.75247	2.25468	1.42991	1.46143	2.30786
12917787	NA	NULL	3.33909	3.2745	2.27352	2.66019	1.96329	1.98959	2.69252	2.4231	2.60403	2.79524	2.12179	2.3013	3.04446	2.9565	3.18395	3.162
12917789	NA	NULL	3.79959	4.463	3.35665	4.31396	3.16546	3.94905	3.63271	3.97598	3.37123	4.22284	3.43274	4.01935	4.57592	5.00908	4.70252	4.81276
12917791	NA	NULL	5.38502	5.24425	5.6832	5.56366	6.08855	5.05443	4.28327	4.9102	5.14948	4.71758	5.71946	4.50877	3.89085	2.82012	3.98938	3.57158
12917793	NA	NULL	6.93787	5.91513	5.80036	7.42223	5.9604	5.27439	6.53387	5.71035	7.30482	5.87389	5.56106	7.02983	4.76618	5.97527	5.97927	5.33495
12917795	NA	NULL	3.77659	5.38267	4.47963	4.43458	3.51607	3.62603	4.38727	3.6083	2.78436	3.5104	3.16548	3.88225	4.28259	4.5784	4.67861	4.4116
12917797	NA	NULL	5.59934	6.6811	5.18217	3.46538	5.27447	5.54628	6.16867	6.39663	5.24252	6.00143	3.83406	4.71437	4.6339	4.92417	5.8232	5.25511
12917799	NA	NULL	3.05373	4.9132	4.14792	2.91286	2.5368	2.9304	3.67555	4.71914	4.09124	4.4364	5.80789	4.01231	4.39245	3.41026	3.00284	4.07221
12917801	NA	NULL	5.20724	2.52274	5.785	5.39871	2.40631	1.6218	3.08306	3.03222	3.2596	2.96512	3.24554	4.91547	4.9809	4.83543	4.31136	5.41569
12917803	NA	NULL	4.27332	5.30057	5.86981	5.05429	4.86653	4.44968	4.58256	5.0167	2.94025	5.31069	3.07225	4.77126	6.02994	5.10227	5.11428	5.46944
12917805	NA	NULL	3.77104	3.64943	4.2016	3.58352	3.97738	3.98025	4.35211	3.4953	3.9511	3.93576	4.50195	4.74274	3.22524	2.99581	2.72113	3.42568
12917807	NA	NULL	2.9954	3.63548	4.35852	4.23261	3.96162	3.50812	3.50166	3.76121	2.76678	3.59112	3.21916	3.87084	4.09057	4.10017	2.88032	3.81263
12917809	NA	NULL	2.34777	2.12588	1.72071	2.02488	2.15491	3.06687	2.45874	1.69715	2.22528	2.41154	1.55568	1.8024	2.38938	2.16434	1.87491	1.96683
12917811	NA	NULL	2.08173	2.7778	1.97932	1.89112	1.86685	1.88028	2.18273	2.31538	2.35486	2.22305	2.36487	1.90786	1.98321	1.70616	2.00078	1.91523
12917813	NA	NULL	2.07097	2.80566	1.94334	2.01557	2.41857	2.215	2.75221	2.28962	2.22407	2.19131	2.27117	2.25481	1.97378	2.31407	1.94449	1.83811
12917815	NA	NULL	1.54659	1.6598	1.67404	1.73207	1.897	1.55811	3.75928	1.72899	1.48341	2.91164	1.6688	1.87122	1.58346	1.59498	1.5523	1.63116
12917817	NA	NULL	2.97835	3.20301	3.99926	3.90429	3.05579	3.25853	2.5353	2.74992	3.04021	2.52614	3.07698	3.29592	2.83639	2.42492	1.63259	1.99189
12917819	NA	NULL	1.84201	1.52525	1.56221	1.57695	2.15609	1.65903	2.11194	1.80555	1.56971	1.65815	1.33656	1.48011	1.49681	1.54959	1.37039	1.79045
12917821	NA	NULL	1.94035	2.71375	3.24957	2.51969	1.81305	2.27538	2.05974	1.92313	1.95046	1.96023	2.77602	2.77399	2.2175	1.83329	2.26638	2.88389
12917823	NA	NULL	6.64959	6.63139	7.39773	6.80547	6.17168	6.18498	6.44286	6.64673	5.5958	6.17278	7.23703	6.86412	6.76112	6.12517	6.29186	5.91559
12917825	NA	NULL	3.31082	3.05991	4.44999	4.22229	3.62149	3.54079	3.32821	3.22235	3.10827	3.00863	3.38694	3.96147	3.32142	3.29456	3.1839	3.24492
12917827	NA	NULL	3.82839	4.28603	4.39928	4.07241	3.02957	2.61598	2.83032	3.78906	3.19333	2.47135	3.6126	3.521	2.84649	2.85555	2.53374	2.84684
12917829	NA	NULL	2.55353	3.69059	4.05429	4.22331	2.87981	2.05982	2.37633	4.31593	1.64217	2.09491	1.89347	2.71409	2.58479	3.8046	3.39913	1.94931
12917831	NA	NULL	3.36944	4.50642	4.36128	4.32699	3.62396	3.59979	3.85611	3.92835	3.05099	3.42682	2.8808	4.1227	4.73757	5.45383	5.04582	4.83196
12917833	NA	NULL	4.09873	4.66334	4.45768	5.35353	3.08123	3.48541	3.72731	2.84861	2.95519	2.72568	5.8841	4.27682	5.21924	5.31645	5.78387	5.88626
12917835	NA	NULL	2.03488	1.62091	1.85113	1.92442	1.63564	1.73656	1.7776	2.15257	1.83646	1.81504	1.89268	2.424	2.07261	2.11663	2.2051	2.31298
12917837	NA	NULL	2.06469	1.76361	1.74979	1.83357	1.81104	1.87982	1.62662	2.10403	1.76037	1.75286	1.98184	1.671	2.00175	2.04345	1.85629	1.93908
12917839	NA	NULL	4.12466	3.5455	5.65903	5.37419	3.12423	3.32706	3.61931	3.85808	2.85938	3.18203	4.73883	4.28864	4.47465	3.99599	4.30522	4.76145
12917841	NA	NULL	3.95996	4.50359	6.20535	5.61158	5.32473	4.87295	4.81902	4.01928	4.56939	4.13554	6.33504	5.15168	4.53282	5.25851	3.91176	4.14893
12917843	NA	NULL	2.20618	1.83826	2.05256	2.08692	1.97387	1.83014	1.86787	2.16165	1.89391	2.12619	1.66857	2.27245	1.82301	1.71416	1.90813	2.03664
12917845	NA	NULL	1.8547	1.85664	2.24244	1.52177	1.88163	1.78363	1.55569	1.86343	1.93858	1.82377	1.74781	2.4792	2.68464	2.24989	2.30605	2.95019
12917847	NA	NULL	5.62327	5.97999	8.78636	9.2516	4.82093	5.52701	5.83291	5.37646	5.51212	5.48911	8.27199	8.74469	9.4106	8.71689	8.90808	9.23171
12917849	NA	NULL	2.6487	2.12645	2.64431	2.24084	1.38015	1.47532	3.48541	2.0409	2.16497	1.57849	3.23436	2.51608	1.94245	2.21764	1.53585	1.98984
12917851	NA	NULL	3.71904	3.47612	3.41717	3.24715	3.39059	3.54067	2.948	3.66418	3.06322	3.21447	3.35413	3.73074	3.80498	3.67146	3.34216	3.20507
12917853	NA	NULL	3.54844	3.89301	3.31661	3.48812	3.20042	3.22854	3.47466	3.9584	3.54807	3.46243	3.50281	3.38886	3.42928	4.60324	4.03408	3.824
12917855	NA	NULL	3.11292	2.99415	3.53767	4.09376	3.57813	3.51939	3.29787	3.28754	3.09152	3.35279	3.43278	3.05289	3.49881	3.21891	3.39426	3.43609
12917857	NA	NULL	2.58566	2.91165	3.77345	3.43846	2.8311	2.75358	3.41401	2.94182	3.08316	2.98298	4.6741	2.94396	2.71235	2.88275	3.09764	3.41061
12917859	NA	NULL	1.59532	1.70316	1.76439	1.70231	1.7687	1.40914	1.77048	1.70966	1.66648	1.56961	1.70345	1.57314	1.76734	1.52581	1.49298	2.16311
12917861	NA	NULL	2.41465	2.34496	2.72936	2.75901	2.23117	2.84118	3.17172	2.25857	2.5234	2.84446	2.8211	2.90346	2.86669	2.32787	2.84828	2.48328
12917863	NA	NULL	2.21416	1.97967	2.67624	2.05486	1.86529	1.45269	2.94869	1.66356	1.89615	2.6104	2.01186	2.43311	2.39879	2.23811	1.58106	2.36451
12917865	NA	NULL	2.09248	1.75301	1.74154	1.75479	1.77213	1.71577	1.85173	1.69786	1.95847	1.8749	1.66542	1.49331	1.62264	2.14099	1.96666	1.81063
12917867	NA	NULL	3.47521	3.11348	4.52716	4.46879	2.38365	2.44236	2.36244	2.64536	2.61654	2.53732	3.22108	3.96024	4.38698	3.81662	4.11866	3.97314
12917869	NA	NULL	2.98076	3.95408	2.75524	2.20363	2.71956	3.01848	2.7053	3.69067	3.07299	3.0026	3.69636	2.84764	2.64458	3.12017	2.14775	3.04863
12917871	NA	NULL	2.26358	2.60036	2.74301	2.75773	1.97303	2.49803	3.0269	2.75583	1.7337	1.88071	2.97381	2.69489	3.21636	2.44966	2.65797	2.57169
12917873	NA	NULL	2.59175	3.50262	3.96214	3.05796	2.83699	2.85044	2.41965	2.88712	3.18892	2.63861	2.53299	3.12008	4.15548	4.31472	3.44363	3.55412
12917875	NA	NULL	5.01913	4.51862	4.45768	6.26875	4.89456	5.12851	4.81668	4.71981	5.28484	4.84803	6.69223	4.13446	2.49955	2.65573	2.60586	3.012
12917877	NA	NULL	1.54481	1.55627	1.79947	2.09971	2.24258	1.31114	2.04539	1.50626	2.19699	1.45542	1.68074	1.69093	1.44642	1.5142	1.53055	1.7768
12917879	NA	NULL	2.57245	2.70022	3.85087	3.47387	2.495	2.10472	1.92859	2.32833	2.41877	2.3316	2.78865	3.02551	2.79133	2.9224	2.9062	3.37876
12917881	NA	NULL	6.07636	6.38192	8.89019	7.4339	4.47198	5.83211	6.80163	6.43602	5.86255	6.29828	6.03651	7.83712	6.48817	6.89929	7.19193	6.3608
12917883	NA	NULL	3.3768	3.64987	6.69272	6.77932	3.88062	3.89262	3.36061	3.58946	2.60327	2.97048	5.81914	5.46756	5.21574	3.94267	5.12326	4.12524
12917885	NA	NULL	5.06528	5.11611	4.62332	5.37422	4.51224	4.27833	4.28062	4.84362	4.31545	4.07943	5.22272	5.61395	5.12137	6.06714	5.25367	6.26052
12917887	NA	NULL	1.84986	2.11252	1.72916	1.65953	1.71392	1.74023	1.96732	1.73066	1.74579	1.81347	2.04622	1.95551	1.75066	1.87985	1.64335	2.26161
12917889	NA	NULL	6.82798	5.50883	6.30388	6.81226	5.262	6.26575	6.3264	5.65688	6.17567	5.45071	6.62864	5.77985	5.38041	4.9459	3.85625	5.45562
12917891	NA	NULL	2.13228	2.72833	1.99186	2.27706	2.02827	2.10411	2.25314	2.83366	1.94742	1.83131	2.27142	2.0998	1.73731	2.51443	1.87174	2.41731
12917893	NA	NULL	4.11614	4.14131	4.03952	4.15932	3.82616	3.83601	4.01793	4.19164	3.98479	4.23379	3.75755	4.2942	4.54649	4.24872	4.0981	4.49163
12917895	NA	NULL	3.53372	3.90336	4.0183	4.13903	3.30346	4.00963	3.69281	4.12198	2.71432	3.40117	4.85276	4.30629	4.05826	3.49414	3.78972	4.03381
12917897	NA	NULL	2.95232	3.16893	3.81626	3.0175	2.36789	2.2775	3.07213	3.30013	2.54482	2.78225	3.20929	3.14559	2.90622	3.02572	3.16663	3.09286
12917899	NA	NULL	3.54544	4.2733	6.52098	5.44977	3.50552	3.647	3.65574	5.0347	3.94803	3.6863	5.38099	4.10994	4.20727	5.54243	4.6293	4.50089
12917901	NA	NULL	4.30261	4.14986	4.94216	5.53949	3.91973	3.50757	4.23176	4.32232	3.22027	3.0067	4.31975	4.53356	5.02765	4.01684	5.39884	5.53808
12917903	NA	NULL	4.20148	3.9455	6.02431	6.9126	2.43029	2.46212	3.00463	3.94141	1.88972	2.35448	3.93802	5.85897	5.31953	5.57667	5.74874	5.36004
12917905	NA	NULL	2.24818	2.02792	3.32262	3.8114	2.07466	2.03255	2.48225	1.88983	2.37259	2.16682	2.19562	2.82481	2.69634	2.10089	2.99449	3.06554
12917907	NA	NULL	2.49824	3.75376	4.25777	4.63678	3.42479	3.85508	3.8222	4.16866	2.74313	4.55063	4.86868	5.05109	4.71708	4.7655	4.36523	4.53339
12917909	NA	NULL	3.03968	1.91043	4.06711	2.92521	2.56687	2.65736	2.65679	1.91583	2.66412	2.21499	3.18915	3.0742	3.12937	3.24105	2.82068	3.49004
12917911	NA	NULL	3.17663	3.40178	3.64894	3.65822	3.07566	3.2536	3.09578	3.02967	3.23067	2.63614	4.18325	3.36538	3.47724	3.54199	3.57451	3.55743
12917913	NA	NULL	3.66642	4.55588	4.60574	3.44461	3.67899	3.55219	4.59649	3.81235	3.35621	2.78198	2.7318	3.83403	4.47432	4.23196	4.45674	3.43241
12917915	NA	NULL	4.34585	4.43854	4.81159	4.49564	3.70246	3.30814	4.22281	4.35067	3.89359	3.54751	4.33151	4.43857	3.90681	4.63648	3.30566	3.37918
12917917	NA	NULL	2.29229	1.87965	2.3429	2.75551	2.59883	2.36522	2.51683	1.83299	2.87976	2.16912	3.39279	2.55457	1.97519	1.72584	2.13873	1.6719
12917919	NA	NULL	5.03045	4.97764	4.55688	5.24629	4.54271	4.21809	4.087	5.09468	3.95489	4.08633	5.03918	4.16935	5.29688	5.55724	5.91558	5.35519
12917921	NA	NULL	3.13258	4.01031	3.88506	3.98301	3.15551	2.64927	4.14106	3.15398	2.55419	2.88574	3.38121	3.22373	3.88272	3.08858	3.22913	3.88643
12917923	NA	NULL	3.98121	3.45018	3.81718	5.47769	2.35728	2.96083	2.4558	3.03655	2.28263	2.50229	2.56018	4.0364	4.63667	3.84383	4.44075	4.89427
12917925	NA	NULL	3.91208	3.72854	4.81368	4.7096	2.96689	2.5099	3.66495	3.08433	2.3245	2.22215	3.37172	3.45272	4.92669	5.47543	4.35884	5.24729
12917927	NA	NULL	4.66544	5.90951	6.50165	6.79918	5.02757	5.43493	5.31774	5.33965	3.90277	4.55778	5.97481	6.30168	7.11647	6.88532	6.66935	7.01681
12917929	NA	NULL	3.56438	3.4222	5.2319	4.94258	3.06318	3.76915	3.33902	2.62451	3.57228	3.08767	3.78251	4.42321	4.69889	4.51227	4.56915	4.32853
12917931	NA	NULL	1.81188	2.03876	2.98632	2.65261	1.96776	1.88207	1.69829	1.67664	1.70198	1.76052	2.40617	2.06208	2.6725	2.84766	1.91797	3.09831
12917933	NA	NULL	2.20069	1.90934	2.36493	2.478	2.70615	1.82859	1.68507	2.52244	1.79056	2.17535	2.14123	2.46107	3.03388	2.85393	2.81128	2.74858
12917935	NA	NULL	5.09913	5.67102	7.61231	8.09992	4.34681	4.52029	4.82986	5.63549	4.14608	4.32653	5.32352	6.12368	6.22038	6.58044	5.9377	5.87128
12917937	NA	NULL	2.37272	2.71057	2.45945	2.26872	3.16777	1.86622	2.553	2.49372	2.54321	2.72236	1.76806	1.62885	2.34343	2.19472	2.80264	2.43442
12917939	NA	NULL	1.7492	1.62451	1.5553	1.58981	1.66926	1.4911	1.90908	1.62362	1.82976	1.4527	1.51696	1.45869	1.83508	1.59838	1.48723	1.42937
12917941	NA	NULL	5.37805	5.89868	7.30192	7.05928	4.24725	5.26866	5.38451	5.25833	5.2322	5.3102	6.75789	6.59495	6.95005	6.9008	7.10164	7.11816
12917943	NA	NULL	9.18535	8.57746	10.3572	10.1375	7.6668	8.08195	8.43283	8.26261	8.50633	8.51814	8.94475	9.68518	8.79708	9.89823	9.37662	10.0417
12917945	NA	NULL	3.75485	4.31197	4.03483	4.24619	3.6128	3.48185	3.67102	4.25128	3.69307	3.14156	3.75835	3.55474	4.42503	3.75209	3.66344	3.89003
12917947	NA	NULL	3.68244	4.01741	4.08182	3.97044	3.45259	3.79694	3.53121	3.61018	3.35586	3.36118	3.80089	3.89858	4.34236	5.09553	4.78299	4.34979
12917949	NA	NULL	1.88967	2.0737	2.03287	2.21462	1.65859	1.66756	1.87281	2.43375	2.18366	1.82714	1.93178	1.85235	1.8073	2.10712	1.74198	1.87766
12917951	NA	NULL	1.8646	2.15315	2.09987	2.25758	2.20348	2.03219	2.45101	2.87215	1.70728	2.23265	1.63468	1.8622	2.72007	2.16721	1.97514	2.21927
12917953	NA	NULL	2.73502	3.924	2.32729	2.77634	2.09952	2.18516	2.40578	2.57067	1.91319	2.24416	2.53507	2.66076	4.07461	2.34723	2.1374	2.27948
12917955	NA	NULL	1.6167	2.16446	1.84273	1.56192	2.12267	1.83151	1.76338	1.55656	1.60774	1.85963	1.70025	1.74745	1.86986	1.6329	1.60551	1.70008
12917957	NA	NULL	3.38104	3.57118	4.16627	4.01582	3.55299	3.70784	3.50115	3.67919	3.57191	3.36731	3.58043	3.52077	5.00806	4.80684	4.9386	5.34345
12917959	NA	NULL	3.72019	4.40531	6.35145	5.71881	3.25741	3.79534	4.40946	3.67551	3.59151	3.60052	4.9961	5.01095	4.73139	5.5711	4.97606	5.55345
12917961	NA	NULL	4.22762	3.82542	3.57646	4.35548	2.96211	2.9677	3.64633	3.62113	2.91409	3.60787	3.66307	3.17583	3.82894	3.62521	3.54721	3.83673
12917963	NA	NULL	1.74331	1.71741	1.85067	1.6266	1.61356	1.66513	1.78694	1.74167	1.55673	1.4628	1.47843	1.42736	1.58926	1.48042	1.47162	1.88479
12917965	NA	NULL	4.14392	4.0043	4.51252	4.1971	4.1641	3.3981	3.85308	3.44577	3.53889	3.59844	4.94027	4.08497	3.86897	4.20635	3.72228	4.13917
12917967	NA	NULL	5.10777	6.16324	6.8593	6.62853	5.26864	4.89967	5.85567	5.79803	6.06708	6.06739	7.49661	6.67729	6.05704	6.69257	6.43727	7.21088
12917969	NA	NULL	8.00594	7.90558	9.09482	9.14609	6.91693	7.6205	7.44186	7.7591	7.27613	7.75251	6.90855	8.35953	8.89594	8.59575	8.92557	8.77649
12917971	NA	NULL	2.10171	2.47549	1.87037	1.75094	2.37332	2.08336	1.98709	1.85844	2.37459	2.04676	2.04095	2.15608	1.57126	2.02866	1.73352	2.71881
12917973	NA	NULL	7.22653	7.2653	7.54025	8.21989	7.34833	7.01688	6.95165	6.96044	6.73457	6.59423	7.54782	8.07529	6.70835	7.24918	6.42733	7.76308
12917975	NA	NULL	4.76329	5.73774	5.49971	5.57273	4.34244	4.18843	4.58217	5.43628	4.31965	5.10575	5.13736	5.39458	5.71056	5.52636	5.27068	5.15821
12917977	NA	NULL	1.98147	2.52537	2.18592	2.48233	1.6706	2.01435	1.90073	1.55304	1.8389	2.87657	2.29601	2.06246	2.06205	1.77357	1.72351	1.86833
12917979	NA	NULL	2.14265	2.047	1.81468	1.96247	2.41869	2.44937	2.73359	2.36594	2.50707	2.35027	2.98927	2.59868	2.08809	2.75741	2.48952	1.95478
12917981	NA	NULL	1.77431	1.81039	1.78933	1.73958	2.00972	1.74633	2.04425	1.62593	1.62171	2.13504	1.57964	1.64256	2.2494	1.74388	1.84498	1.90353
12917983	NA	NULL	2.28743	3.4293	4.75119	4.02282	2.36132	2.78432	2.9141	3.16775	2.68971	2.99001	2.96543	2.59218	4.65374	3.58284	3.73918	4.44373
12917985	NA	NULL	2.28194	2.25976	2.28674	2.19784	2.11682	2.48237	2.33523	2.88816	2.13306	2.489	2.13947	2.31514	2.35605	2.24211	2.95285	2.73333
12917987	NA	NULL	2.39578	2.3571	2.29568	2.25545	2.39729	2.00052	2.92165	2.11713	2.19826	2.34152	2.1388	2.23305	2.74432	3.12173	2.41353	2.39873
12917989	NA	NULL	3.84356	3.66872	4.38599	4.2475	3.76976	4.19448	4.05739	4.0163	4.24971	3.8218	4.14291	3.75581	4.28445	4.3688	4.39237	3.51828
12917991	NA	NULL	3.08956	2.80368	4.14775	3.37467	2.39005	2.83289	3.0122	3.32805	2.69717	2.89025	3.12446	2.99579	3.91759	2.99991	4.63027	4.15448
12917993	NA	NULL	3.525	3.33192	4.2854	4.04896	3.6671	3.54186	3.68615	3.00304	3.63303	4.37907	5.31682	4.2655	4.16156	3.83508	4.14352	4.67469
12917995	NA	NULL	2.02863	2.07011	2.22825	3.24499	1.95211	1.92409	2.46209	2.1222	2.40348	2.06156	2.06865	2.21711	1.96904	2.15674	2.00314	2.26656
12917997	NA	NULL	3.19078	3.91142	2.71845	5.08491	3.73524	5.48302	4.12048	2.96326	5.68608	5.65938	4.01837	5.74023	5.98708	6.59713	6.52642	6.99803
12917999	NA	NULL	1.79525	1.74018	2.01437	1.7369	1.73913	1.5888	2.03618	1.64345	1.54029	1.71526	1.72004	1.79898	1.76839	1.66773	1.6839	2.15855
12918001	NA	NULL	2.98013	2.37311	2.42401	2.39092	2.37447	2.32432	2.80131	2.93531	2.64617	2.46778	2.55506	3.05736	2.18571	2.48048	1.99853	2.21468
12918003	NA	NULL	2.42915	2.34752	2.88802	2.62184	2.65866	2.55869	2.7327	2.03554	2.76363	2.50529	3.14201	3.05213	2.38944	2.74939	2.31259	2.55843
12918005	NA	NULL	4.06278	3.17605	5.32941	5.42091	2.92867	3.42052	3.12701	3.2869	4.64207	4.52071	3.92869	4.82636	4.78089	5.24063	4.77045	5.23425
12918007	NA	NULL	7.21521	6.92763	8.15358	8.20434	5.66315	5.58384	6.54553	6.38604	6.7258	6.50176	6.97071	7.79135	7.54493	7.91131	7.86294	7.97975
12918009	NA	NULL	2.91085	2.72173	3.79177	3.06509	3.71715	3.7832	3.29306	3.03177	2.85049	3.06803	3.04337	3.04741	3.25838	3.4461	2.91746	3.12528
12918011	NA	NULL	2.25651	3.16437	1.97672	2.62636	2.71444	2.0261	2.5899	2.52155	2.588	2.93653	2.84532	2.50054	3.01638	2.56161	2.32301	3.00716
12918013	NA	NULL	1.46803	1.91796	1.49808	1.61645	1.58138	1.49517	1.52686	1.51962	1.46092	1.47928	1.75506	1.56252	1.89174	1.59315	1.53055	1.52865
12918015	NA	NULL	2.43571	3.16652	2.03345	2.23228	2.97828	2.01183	2.68365	1.99923	2.15848	2.03349	2.43975	2.32529	2.38463	1.77707	2.38176	2.00264
12918017	NA	NULL	3.96855	4.59129	3.75038	3.752	3.16684	4.24022	3.85509	4.0116	4.13739	4.40531	4.21764	3.81128	4.62785	4.91801	5.12141	5.05715
12918019	NA	NULL	2.11826	2.3893	3.70756	2.91063	2.59817	2.97277	2.93144	2.5802	1.86057	2.76642	2.51388	2.90374	2.9393	2.25232	2.66953	2.94655
12918021	NA	NULL	3.64994	2.60998	2.93486	2.62678	2.66649	3.03593	2.65056	2.77926	2.644	2.24903	2.06399	2.48565	2.691	3.10865	3.29774	2.80993
12918023	NA	NULL	3.00843	2.39736	2.58445	2.63902	2.28931	3.38876	3.05896	3.67767	2.84857	3.34227	2.46371	2.19693	2.8866	3.05399	3.23513	3.2213
12918025	NA	NULL	2.29404	2.55202	2.28798	2.39323	3.35713	2.53539	2.15379	2.41399	2.5201	2.62545	2.37102	2.26705	3.62268	3.66606	3.0029	2.80949
12918027	NA	NULL	5.59103	7.03167	6.81701	6.82055	5.7561	5.55948	5.65394	6.56771	5.86196	6.67174	6.57535	6.76076	6.33532	6.3425	6.32085	6.63283
12918029	NA	NULL	3.69059	3.07065	2.63485	3.08616	2.35096	3.14777	3.64001	3.60063	3.69673	3.26782	3.22177	2.9285	2.65538	2.1103	2.786	3.2168
12918031	NA	NULL	9.33945	9.57542	10.9103	10.9751	7.96301	8.14552	9.25267	9.03187	8.8074	9.02951	9.4751	10.3025	10.1357	10.1101	9.84501	10.4081
12918033	NA	NULL	5.4508	4.97906	4.68589	5.56243	5.13888	5.12673	5.18644	4.85023	4.18227	5.81652	4.48727	6.34061	6.89519	6.64794	6.36024	6.17131
12918035	NA	NULL	7.70476	8.21565	9.19125	9.47652	7.42701	7.39811	7.63522	7.76122	7.53323	7.50747	8.88302	9.02906	8.05605	8.38864	7.83702	7.95269
12918037	NA	NULL	4.35503	4.44502	6.83213	7.5391	4.83905	4.95756	5.30192	4.34822	5.02773	4.06221	6.32329	6.56972	5.07733	4.38713	4.97316	5.69681
12918039	NA	NULL	6.35712	4.50444	6.37089	6.05326	4.36928	4.90396	5.16803	5.96367	6.34031	6.05	4.34319	6.16455	7.14747	6.07451	6.70015	6.63579
12918041	NA	NULL	3.11942	2.69509	3.02147	2.37656	3.90211	3.06219	3.09923	3.12564	2.99802	3.52815	3.08391	2.51257	2.12929	2.42226	2.69872	2.48453
12918043	NA	NULL	1.74331	1.71741	1.85067	1.6266	1.61356	1.66513	1.78694	1.74167	1.55673	1.4628	1.47843	1.42736	1.58926	1.48042	1.47162	1.88479
12918045	NA	NULL	4.14392	4.0043	4.51252	4.1971	4.1641	3.3981	3.85308	3.44577	3.53889	3.59844	4.94027	4.08497	3.86897	4.20635	3.72228	4.13917
12918047	NA	NULL	5.10777	6.16324	6.8593	6.62853	5.26864	4.89967	5.85567	5.79803	6.06708	6.06739	7.49661	6.67729	6.05704	6.69257	6.43727	7.21088
12918049	NA	NULL	8.00594	7.90558	9.09482	9.14609	6.91693	7.6205	7.44186	7.7591	7.27613	7.75251	6.90855	8.35953	8.89594	8.59575	8.92557	8.77649
12918051	NA	NULL	2.10171	2.47549	1.87037	1.75094	2.37332	2.08336	1.98709	1.85844	2.37459	2.04676	2.04095	2.15608	1.57126	2.02866	1.73352	2.71881
12918053	NA	NULL	7.22653	7.2653	7.54025	8.21989	7.34833	7.01688	6.95165	6.96044	6.73457	6.59423	7.54782	8.07529	6.70835	7.24918	6.42733	7.76308
12918055	NA	NULL	4.76329	5.73774	5.49971	5.57273	4.34244	4.18843	4.58217	5.43628	4.31965	5.10575	5.13736	5.39458	5.71056	5.52636	5.27068	5.15821
12918057	NA	NULL	1.98147	2.52537	2.18592	2.48233	1.6706	2.01435	1.90073	1.55304	1.8389	2.87657	2.29601	2.06246	2.06205	1.77357	1.72351	1.86833
12918059	NA	NULL	2.14265	2.047	1.81468	1.96247	2.41869	2.44937	2.73359	2.36594	2.50707	2.35027	2.98927	2.59868	2.08809	2.75741	2.48952	1.95478
12918061	NA	NULL	1.77431	1.81039	1.78933	1.73958	2.00972	1.74633	2.04425	1.62593	1.62171	2.13504	1.57964	1.64256	2.2494	1.74388	1.84498	1.90353
12918063	NA	NULL	2.28743	3.4293	4.75119	4.02282	2.36132	2.78432	2.9141	3.16775	2.68971	2.99001	2.96543	2.59218	4.65374	3.58284	3.73918	4.44373
12918065	NA	NULL	2.28194	2.25976	2.28674	2.19784	2.11682	2.48237	2.33523	2.88816	2.13306	2.489	2.13947	2.31514	2.35605	2.24211	2.95285	2.73333
12918067	NA	NULL	2.39578	2.3571	2.29568	2.25545	2.39729	2.00052	2.92165	2.11713	2.19826	2.34152	2.1388	2.23305	2.74432	3.12173	2.41353	2.39873
12918069	NA	NULL	3.84356	3.66872	4.38599	4.2475	3.76976	4.19448	4.05739	4.0163	4.24971	3.8218	4.14291	3.75581	4.28445	4.3688	4.39237	3.51828
12918071	NA	NULL	3.08956	2.80368	4.14775	3.37467	2.39005	2.83289	3.0122	3.32805	2.69717	2.89025	3.12446	2.99579	3.91759	2.99991	4.63027	4.15448
12918073	NA	NULL	3.525	3.33192	4.2854	4.04896	3.6671	3.54186	3.68615	3.00304	3.63303	4.37907	5.31682	4.2655	4.16156	3.83508	4.14352	4.67469
12918075	NA	NULL	2.02863	2.07011	2.22825	3.24499	1.95211	1.92409	2.46209	2.1222	2.40348	2.06156	2.06865	2.21711	1.96904	2.15674	2.00314	2.26656
12918077	NA	NULL	3.19078	3.91142	2.71845	5.08491	3.73524	5.48302	4.12048	2.96326	5.68608	5.65938	4.01837	5.74023	5.98708	6.59713	6.52642	6.99803
12918079	NA	NULL	1.79525	1.74018	2.01437	1.7369	1.73913	1.5888	2.03618	1.64345	1.54029	1.71526	1.72004	1.79898	1.76839	1.66773	1.6839	2.15855
12918081	NA	NULL	2.98013	2.37311	2.42401	2.39092	2.37447	2.32432	2.80131	2.93531	2.64617	2.46778	2.55506	3.05736	2.18571	2.48048	1.99853	2.21468
12918083	NA	NULL	2.42915	2.34752	2.88802	2.62184	2.65866	2.55869	2.7327	2.03554	2.76363	2.50529	3.14201	3.05213	2.38944	2.74939	2.31259	2.55843
12918085	NA	NULL	4.06278	3.17605	5.32941	5.42091	2.92867	3.42052	3.12701	3.2869	4.64207	4.52071	3.92869	4.82636	4.78089	5.24063	4.77045	5.23425
12918087	NA	NULL	7.21521	6.92763	8.15358	8.20434	5.66315	5.58384	6.54553	6.38604	6.7258	6.50176	6.97071	7.79135	7.54493	7.91131	7.86294	7.97975
12918089	NA	NULL	2.91085	2.72173	3.79177	3.06509	3.71715	3.7832	3.29306	3.03177	2.85049	3.06803	3.04337	3.04741	3.25838	3.4461	2.91746	3.12528
12918091	NA	NULL	2.25651	3.16437	1.97672	2.62636	2.71444	2.0261	2.5899	2.52155	2.588	2.93653	2.84532	2.50054	3.01638	2.56161	2.32301	3.00716
12918093	NA	NULL	1.99963	3.15234	2.67015	2.36072	2.73655	2.44926	3.87414	2.68947	1.79634	2.78397	2.0496	2.20333	2.58414	2.63797	2.56815	2.71038
12918095	NA	NULL	5.29186	5.25399	5.63959	5.68523	4.74236	4.54441	5.20297	4.16456	3.95854	4.96448	4.6	5.21708	4.71254	5.5838	4.99638	5.42883
12918097	NA	NULL	4.31159	4.43458	3.63866	4.27998	3.66692	3.70967	4.66671	4.4304	3.95475	4.68353	4.27872	4.38813	4.09647	4.53755	3.86152	3.29408
12918099	NA	NULL	2.25366	1.83459	2.14158	1.69561	2.15675	1.65201	2.6278	1.85907	2.15364	1.88124	2.16454	2.00737	2.01594	1.59064	1.94703	2.06578
12918101	NA	NULL	2.53412	2.4132	2.60129	2.46607	2.23463	2.15374	3.1297	2.58756	2.11062	2.52632	3.01331	2.56986	1.83474	1.84117	2.46644	2.4898
12918103	NA	NULL	3.23061	2.99862	2.48238	2.7563	1.72339	2.26514	3.32053	2.56878	2.38814	3.23668	2.73906	2.21914	2.30724	2.16619	2.26452	2.30232
12918105	NA	NULL	3.94091	3.55537	3.9532	3.07512	3.73923	3.36646	3.20915	3.1413	3.54021	2.51605	3.77094	3.98904	3.35259	3.31167	3.54998	3.77112
12918107	NA	NULL	3.08912	3.36175	2.6255	2.81932	3.0298	2.79641	3.48951	2.85003	3.54965	2.77007	3.49526	2.90493	3.62106	3.00465	3.31565	3.52822
12918109	NA	NULL	3.37494	3.51168	2.82849	3.4964	4.00301	4.06873	3.67961	4.05551	3.70103	3.00634	2.62843	3.68621	2.71533	2.73919	2.37521	3.87975
12918111	NA	NULL	1.73187	1.60226	2.14704	2.05675	1.80343	1.72361	1.87592	1.35635	1.88876	1.50315	1.91456	1.76295	2.02407	1.86674	2.29951	2.52965
12918113	NA	NULL	1.80935	1.8408	1.75562	1.59229	2.07847	1.93894	2.48628	1.753	1.86771	1.91561	1.99116	1.80723	2.18343	2.24339	1.72117	1.8251
12918115	NA	NULL	5.8206	4.98019	5.86557	5.97212	4.94705	5.11313	5.09713	5.06648	5.54072	4.60877	5.8989	5.56407	4.70263	4.24917	4.47209	4.30519
12918117	NA	NULL	1.75055	1.83136	1.67786	1.69653	1.45181	1.48397	1.74832	1.74566	1.73885	1.66111	1.63221	1.56175	1.71602	1.45339	1.63221	1.89784
12918119	NA	NULL	2.05705	2.15099	1.7855	1.96531	1.71829	1.72672	2.63514	1.99851	1.87948	1.81477	1.91653	2.13115	1.96352	2.1324	1.86279	2.40931
12918121	NA	NULL	1.9444	1.80295	2.13164	2.4789	1.64546	2.5421	1.92797	2.53384	2.37942	1.679	1.6494	2.22834	2.72861	2.44966	3.07789	2.96786
12918123	NA	NULL	2.1966	2.70891	2.94443	3.28776	2.09481	2.13027	2.37633	1.65647	2.49077	2.8455	2.40187	3.38741	5.0967	4.66354	4.99432	5.46271
12918125	NA	NULL	2.80185	2.44745	2.77265	2.87701	2.56132	2.59295	2.37004	2.12567	2.77167	2.65483	2.63028	3.16855	3.34808	3.00981	3.58382	3.50232
12918127	NA	NULL	2.14106	2.27063	2.03338	2.53775	2.75551	2.19145	1.84498	2.34965	2.25459	1.96466	3.11958	2.43357	2.29904	3.2694	2.58574	2.50704
12918129	NA	NULL	1.76117	1.84857	2.03854	1.67808	1.61433	1.61293	2.0317	2.53178	1.65148	1.80835	1.61641	1.79856	1.9284	2.53451	2.17396	2.41073
12918131	NA	NULL	2.18237	2.56521	2.9316	2.17167	2.73699	2.38413	2.72757	2.44694	2.31235	2.30681	2.11954	2.362	2.5205	2.81463	2.83648	3.00888
12918133	NA	NULL	2.00421	1.70546	2.26167	1.84215	1.83082	1.80399	2.42215	2.27652	1.71835	2.21362	1.61861	2.05236	2.43071	2.69607	2.44638	2.62297
12918135	NA	NULL	3.36601	4.05075	4.76943	4.78986	3.60905	3.53293	4.38236	3.92578	3.98371	3.50992	4.48611	4.43766	5.04853	4.37299	4.41767	4.58114
12918137	NA	NULL	3.23536	3.14428	2.85698	3.26921	2.50051	3.24761	4.15774	4.12712	4.02013	3.43032	4.24835	3.63605	3.81226	3.66098	2.9686	3.84444
12918139	NA	NULL	4.47602	4.85031	2.83369	4.04596	3.61006	4.36751	4.06856	4.79024	3.75197	4.55394	2.92585	3.65881	3.83871	3.75929	3.37465	3.30611
12918141	NA	NULL	2.48094	2.95521	2.1194	3.50647	2.37511	2.34835	2.83563	2.70961	2.38609	2.20589	3.40848	2.10485	1.9117	2.85592	1.9328	2.24731
12918143	NA	NULL	3.37693	3.3528	3.04403	2.76691	3.34052	3.17763	3.26268	3.15259	3.96402	3.70026	2.33919	2.67666	3.66622	3.19815	3.27556	3.31413
12918145	NA	NULL	4.78687	5.81581	5.57693	5.35139	4.29225	4.49562	4.65181	5.49878	4.77077	5.42133	4.30132	4.19646	5.30766	5.50734	4.22192	5.2836
12918147	NA	NULL	6.25827	6.17094	6.74434	6.5043	4.95243	5.58229	5.74673	6.03718	6.05165	6.56497	6.04464	6.24383	6.22338	6.1269	6.18722	5.86161
12918149	NA	NULL	3.61771	3.91836	4.15773	3.58983	3.42469	3.77741	3.56645	3.39166	2.81774	3.5783	3.06588	3.64906	4.6195	4.20424	3.83865	3.98418
12918151	NA	NULL	2.06097	3.26172	2.66362	2.74908	2.35354	2.42276	2.74356	2.43018	2.47606	2.47657	2.45918	2.45944	2.79385	2.06537	2.23731	2.70379
12918153	NA	NULL	4.24244	4.51733	3.38023	3.30194	3.10358	4.38068	4.40386	4.46148	4.39542	3.7355	2.17529	3.74131	4.33185	4.16909	4.20773	4.40535
12918155	NA	NULL	2.66912	1.85153	2.32961	2.46301	2.22184	2.35777	1.67353	1.7812	1.88136	2.25972	2.04188	1.66256	1.92842	3.22504	1.66127	1.6254
12918157	NA	NULL	4.84459	4.90345	5.36966	4.5452	3.79897	4.43297	4.38232	4.48992	4.54143	4.47954	4.82727	5.02351	4.62766	4.71671	4.60646	5.08807
12918159	NA	NULL	7.5072	7.84716	9.48707	9.59263	7.36413	7.23753	7.52543	7.69354	7.29556	7.72104	9.13642	9.00501	9.07668	9.48582	8.66822	9.42514
12918161	NA	NULL	4.9436	5.24116	5.42988	4.44109	4.808	5.19987	5.38356	5.27371	4.09747	5.40033	4.58598	5.03696	5.93414	4.74588	5.25382	4.89885
12918163	NA	NULL	1.89357	2.02321	2.11926	1.99644	1.82938	2.03971	1.74602	2.17609	1.89262	2.07727	1.99511	1.87144	2.34805	2.8086	1.93831	2.2301
12918165	NA	NULL	3.94543	4.29235	5.89755	6.10657	3.2765	3.85294	3.10875	4.28356	3.4929	3.06885	4.57708	5.45878	5.98366	4.7749	5.86899	5.41607
12918167	NA	NULL	1.91327	1.94792	1.8947	1.94387	1.70599	1.61251	1.77952	2.16707	1.82322	1.83546	1.56516	1.80736	2.90267	2.82397	2.32014	3.0551
12918169	NA	NULL	2.19485	2.51109	2.4019	2.19652	2.10906	2.14393	3.00675	2.10576	2.43587	1.85188	2.22566	2.10816	2.33171	2.65179	2.28848	2.01801
12918171	NA	NULL	1.92403	1.83634	2.19739	1.71051	2.01638	1.93658	1.78702	1.67327	1.6657	1.87709	1.6586	1.7614	1.89445	1.92709	2.02006	2.34254
12918173	NA	NULL	2.27603	2.84113	2.29617	2.00393	1.77469	2.06554	2.45885	2.09548	1.84365	2.1885	1.67761	1.96388	2.66218	1.97359	2.36094	2.11891
12918175	NA	NULL	1.86592	1.74001	2.02949	2.0974	1.93825	1.92141	1.79131	1.97599	1.93603	1.49964	1.9342	1.88091	1.87474	1.9267	1.94358	1.98677
12918177	NA	NULL	2.21764	2.22763	2.30043	2.61106	2.28085	2.68388	2.36046	2.3001	1.91827	2.2523	2.02278	2.29143	2.86764	2.9776	3.01744	2.98375
12918179	NA	NULL	2.42565	2.64577	2.91874	2.75118	2.54894	2.58137	2.38378	2.78492	2.69064	2.52178	2.93381	2.19606	2.60721	3.47392	3.35272	2.43274
12918181	NA	NULL	1.55043	1.66883	1.38549	1.51254	1.50472	1.65596	1.72898	1.671	1.53881	1.78469	1.59507	1.65511	1.62678	1.45101	1.47458	1.70547
12918183	NA	NULL	3.87292	3.01621	3.62569	4.53829	4.37137	4.1874	3.93042	3.85928	3.74098	3.2436	4.84252	3.88501	2.9364	3.73487	3.18144	3.32756
12918185	NA	NULL	2.31951	2.29897	2.30495	2.40973	1.76539	2.29256	2.21554	2.07123	1.85221	2.24877	2.17474	1.82638	2.66773	2.92047	2.24886	2.44968
12918187	NA	NULL	3.14224	2.58867	3.73099	2.6629	2.17633	2.16207	2.14804	2.98804	2.2153	2.72532	2.32117	1.97661	3.6052	4.43282	3.69358	4.20557
12918189	NA	NULL	5.1068	6.08975	7.09336	6.34591	5.22114	4.84905	5.75324	6.01649	5.132	5.3256	4.93407	5.12061	5.53934	5.57567	5.91652	5.42143
12918191	NA	NULL	1.86915	2.37771	2.00649	2.13977	1.86769	1.92222	2.16207	2.07734	1.87434	2.22302	2.03758	1.98323	1.8755	2.10211	1.72377	1.75256
12918193	NA	NULL	2.6056	2.35949	2.04798	1.98468	2.21699	2.20087	3.04613	2.34684	2.27277	2.52453	2.04625	2.11013	2.35259	2.10473	2.05704	2.67883
12918195	NA	NULL	2.32049	2.89361	2.21635	3.14119	2.18452	2.49351	3.42241	2.28571	2.53826	2.54464	1.55094	2.63064	2.28165	2.6354	3.25624	3.9754
12918197	NA	NULL	2.75823	1.89701	2.57898	2.17442	2.06265	2.19067	2.97097	1.71022	2.085	1.47928	2.46581	2.29617	2.82869	2.19696	2.39915	3.45643
12918199	NA	NULL	6.13127	5.98948	5.82588	6.14307	5.06641	4.83694	5.86985	5.47832	5.96634	5.8529	5.55282	5.89564	6.58188	6.56922	6.14233	6.90192
12918201	NA	NULL	4.61269	4.37446	4.34858	4.03645	3.23058	3.10308	4.17164	3.74682	4.69486	3.29696	4.57981	3.22322	3.6566	4.17392	4.08225	3.95778
12918203	NA	NULL	2.78057	3.40597	1.96139	2.18733	2.13046	1.89531	2.41776	2.51507	2.36776	3.19579	2.09353	2.36238	2.83401	1.88495	2.48356	2.13954
12918205	NA	NULL	2.20618	1.691	1.96539	2.90855	1.66818	1.90949	1.90048	1.60183	2.04863	1.79685	1.60002	1.91396	2.28457	2.00096	2.17951	2.26352
12918207	NA	NULL	5.05723	5.66331	5.30476	5.59427	4.49666	5.05684	6.16852	5.15092	5.83102	5.50364	2.93034	5.61845	6.26777	5.57029	6.06105	5.50545
12918209	NA	NULL	3.67427	4.14303	3.9182	4.31306	4.70742	4.00383	4.1769	3.70979	4.49299	4.4571	4.43962	4.36692	4.16328	4.05984	3.72181	4.16064
12918211	NA	NULL	4.45139	4.41266	6.01685	5.43207	4.60479	5.31977	4.39372	4.89381	4.67565	4.46888	4.57028	5.45824	4.41155	5.38118	5.41146	5.2334
12918213	NA	NULL	3.35618	2.85608	4.43714	5.09303	2.94137	3.71795	4.02745	3.43982	3.75409	3.08318	3.93631	4.28418	4.68284	5.42235	4.40946	5.43833
12918215	NA	NULL	2.01258	1.87696	2.63119	2.51649	1.90861	1.98737	1.71876	1.8146	2.03038	1.76959	1.70084	2.1298	2.51398	2.06788	2.32521	2.81413
12918217	NA	NULL	2.03968	1.94332	1.73368	1.54952	2.87703	2.64801	2.27505	2.26925	2.72081	2.52985	2.38496	1.66682	2.19884	2.17396	1.89634	1.84693
12918219	NA	NULL	3.1411	3.6049	2.87771	2.66369	3.1835	2.55681	3.5254	3.88468	3.38315	3.58977	3.07837	3.23958	4.07844	4.72123	3.54277	3.91036
12918221	NA	NULL	5.16185	5.50019	4.38369	4.50643	4.32144	4.1916	4.98698	5.37458	4.74973	4.52417	5.28968	4.82829	5.35358	4.50342	5.08913	5.74585
12918223	NA	NULL	3.99788	3.81485	3.89892	4.27757	2.10131	2.9905	3.13524	4.76854	3.2874	3.91169	3.37745	3.9351	2.57015	3.51583	3.66453	3.58822
12918225	NA	NULL	3.47235	4.10718	2.92276	2.39648	2.76401	2.67214	3.15172	4.07481	3.35899	3.42844	2.70827	2.66925	2.82371	2.84824	3.34092	2.49421
12918227	NA	NULL	3.15209	4.14557	4.22396	3.65943	4.21612	3.1287	4.17125	4.12067	3.48147	3.18587	4.5331	3.45157	4.74483	5.16151	4.36302	4.86757
12918229	NA	NULL	6.04472	6.15623	6.66141	6.75062	6.81824	6.47962	5.78767	5.54359	5.35877	5.58001	6.81059	5.99735	4.96574	4.10901	3.99404	5.17065
12918231	NA	NULL	2.54169	2.67101	2.031	2.75863	2.55295	3.02701	2.6468	2.39538	2.58642	2.37181	3.82363	2.56126	2.18101	2.16284	1.92873	1.75927
12918233	NA	NULL	3.07521	3.18142	4.18903	4.81416	3.22687	2.35566	2.86823	3.02132	3.33967	2.24615	4.1341	4.33895	4.32737	5.23132	3.94552	4.63092
12918235	NA	NULL	4.67381	5.25659	4.03943	3.94114	3.92776	4.14399	3.71376	5.08834	4.87825	4.38011	4.17529	4.16898	4.2069	4.82799	5.58938	3.74939
12918237	NA	NULL	4.27238	4.78116	4.93917	3.4881	3.45867	3.67196	4.13319	4.99205	4.44665	3.9293	2.97784	4.62592	5.02992	5.14897	4.96161	5.208
12918239	NA	NULL	5.52523	6.02716	6.75987	7.5137	5.18934	5.39077	5.52963	6.01661	5.56042	5.76725	5.31942	6.74881	6.87199	7.13576	6.68337	7.65913
12918241	NA	NULL	3.2287	3.15565	2.53183	2.70588	3.05684	3.76093	3.6703	3.23604	2.60108	3.00974	3.49608	3.26869	3.4017	4.66489	3.6592	3.55471
12918243	NA	NULL	2.0839	1.70138	1.4351	1.47428	1.8869	1.79399	1.68875	3.02483	1.71584	3.25262	1.82288	1.75247	2.25468	1.42991	1.46143	2.30786
12918245	NA	NULL	3.33909	3.2745	2.27352	2.66019	1.96329	1.98959	2.69252	2.4231	2.60403	2.79524	2.12179	2.3013	3.04446	2.9565	3.18395	3.162
12918247	NA	NULL	3.79959	4.463	3.35665	4.31396	3.16546	3.94905	3.63271	3.97598	3.37123	4.22284	3.43274	4.01935	4.57592	5.00908	4.70252	4.81276
12918249	NA	NULL	5.38502	5.24425	5.6832	5.56366	6.08855	5.05443	4.28327	4.9102	5.14948	4.71758	5.71946	4.50877	3.89085	2.82012	3.98938	3.57158
12918251	NA	NULL	6.93787	5.91513	5.80036	7.42223	5.9604	5.27439	6.53387	5.71035	7.30482	5.87389	5.56106	7.02983	4.76618	5.97527	5.97927	5.33495
12918253	NA	NULL	3.77659	5.38267	4.47963	4.43458	3.51607	3.62603	4.38727	3.6083	2.78436	3.5104	3.16548	3.88225	4.28259	4.5784	4.67861	4.4116
12918255	NA	NULL	5.59934	6.6811	5.18217	3.46538	5.27447	5.54628	6.16867	6.39663	5.24252	6.00143	3.83406	4.71437	4.6339	4.92417	5.8232	5.25511
12918257	NA	NULL	3.05373	4.9132	4.14792	2.91286	2.5368	2.9304	3.67555	4.71914	4.09124	4.4364	5.80789	4.01231	4.39245	3.41026	3.00284	4.07221
12918259	NA	NULL	5.20724	2.52274	5.785	5.39871	2.40631	1.6218	3.08306	3.03222	3.2596	2.96512	3.24554	4.91547	4.9809	4.83543	4.31136	5.41569
12918261	NA	NULL	4.27332	5.30057	5.86981	5.05429	4.86653	4.44968	4.58256	5.0167	2.94025	5.31069	3.07225	4.77126	6.02994	5.10227	5.11428	5.46944
12918263	NA	NULL	3.77104	3.64943	4.2016	3.58352	3.97738	3.98025	4.35211	3.4953	3.9511	3.93576	4.50195	4.74274	3.22524	2.99581	2.72113	3.42568
12918265	NA	NULL	2.9954	3.63548	4.35852	4.23261	3.96162	3.50812	3.50166	3.76121	2.76678	3.59112	3.21916	3.87084	4.09057	4.10017	2.88032	3.81263
12918267	NA	NULL	2.34777	2.12588	1.72071	2.02488	2.15491	3.06687	2.45874	1.69715	2.22528	2.41154	1.55568	1.8024	2.38938	2.16434	1.87491	1.96683
12918269	NA	NULL	7.11443	7.52614	6.41875	6.03693	7.1537	6.81547	7.79115	7.78561	6.36884	7.05126	5.82831	7.04055	6.5887	6.83562	6.69394	7.1213
12918271	NA	NULL	4.5598	5.54322	4.13053	3.89279	5.097	5.43213	5.09401	5.24627	4.89769	5.27755	3.98077	4.61219	5.27176	4.79659	4.55269	4.83815
12918273	NA	NULL	2.37945	2.73634	1.76638	1.94887	2.24304	2.51918	2.96394	1.67405	1.98219	2.00266	2.75086	1.94157	2.03893	2.1024	2.04571	2.33507
12918275	NA	NULL	2.72958	2.87231	1.76257	2.15107	2.24773	2.60197	2.31082	2.55502	2.11467	2.32673	2.09303	2.15145	2.14978	1.57704	2.23822	2.42297
12918277	NA	NULL	5.70448	5.87154	6.88716	6.42106	5.6219	6.31854	5.75127	6.36659	5.39837	5.47117	5.37933	5.77681	5.89166	6.22624	5.94078	5.79531
12918279	NA	NULL	2.80176	2.65614	2.02345	1.70544	2.64951	2.33629	3.0525	2.58025	1.9565	2.29273	1.51269	1.89557	1.65871	1.92856	2.41491	2.19078
12918281	NA	NULL	4.86182	4.5108	3.52064	3.15858	3.98255	3.34369	4.39371	4.49544	2.51777	3.93651	2.42122	5.13289	3.49146	4.25777	4.58654	5.53422
12918283	NA	NULL	4.08491	3.91963	5.99233	5.3994	4.91377	3.92694	3.13565	3.65051	4.07355	3.77229	3.50089	4.03124	5.52264	5.67172	4.35931	5.95121
12918285	NA	NULL	2.11007	2.91512	1.98533	1.61745	1.97805	2.23264	2.66628	2.39904	2.3797	2.86676	1.80226	1.95526	2.19681	1.98709	2.51979	2.03061
12918287	NA	NULL	6.65433	6.80853	6.06949	6.11045	5.9437	6.02164	6.24667	7.02375	5.7993	6.20064	6.17937	5.45692	7.24943	7.11393	6.80195	6.98921
12918289	NA	NULL	2.63196	2.18775	2.24142	2.0063	2.14884	2.01245	3.17957	2.55272	2.28449	2.0283	2.06662	1.76334	1.90087	1.82948	2.08272	2.0143
12918291	NA	NULL	2.44189	2.20112	2.28324	1.77805	1.69575	1.92685	2.34809	2.19511	2.23536	2.4044	1.81711	2.34558	4.16764	2.09897	2.47372	3.0082
12918293	NA	NULL	4.70885	5.3915	3.63797	3.86488	4.6059	5.03385	4.47608	5.53733	4.26161	5.24317	4.12013	4.02248	4.08565	3.86149	3.97228	3.91782
12918295	NA	NULL	2.44601	3.01443	2.32246	1.89366	1.78473	2.37855	3.0046	2.27448	2.54802	2.4072	1.80822	2.27406	1.98575	1.82055	1.71928	2.03613
12918297	NA	NULL	3.29262	3.55372	3.50647	3.75134	3.58843	3.02905	3.7194	3.94526	2.93462	3.40436	3.49726	4.08025	3.76101	2.70601	3.8391	3.04251
12918299	NA	NULL	5.19865	5.13771	6.2095	5.88352	5.43586	5.76754	5.11153	6.02059	4.88627	5.17503	6.40783	5.9606	5.77052	5.86939	6.3241	5.37601
12918301	NA	NULL	5.07173	5.33383	5.21864	4.59001	4.69606	5.72965	6.32563	5.38667	4.35527	5.5573	3.87611	3.58072	5.02166	5.83677	5.79384	5.35172
12918303	NA	NULL	3.32175	2.79274	2.05085	2.05991	2.45603	3.22757	3.15751	2.74746	2.40607	3.11357	2.1366	2.351	2.05903	2.22897	2.39862	2.03947
12918305	NA	NULL	2.04024	2.3245	1.76573	1.58965	2.03039	2.10308	2.51777	2.11228	1.93815	2.00557	1.73961	1.7186	1.85799	1.83774	1.94353	1.8088
12918307	NA	NULL	2.43242	2.54674	2.09439	2.24817	1.89063	2.69365	2.5356	3.17971	2.09878	2.09165	2.24782	2.45621	2.52438	3.22782	2.57703	2.16123
12918309	NA	NULL	2.89345	3.45306	3.07167	2.54488	3.05808	2.89988	3.60803	2.98756	3.3785	2.96398	3.47572	3.40649	3.4852	3.53288	3.24872	3.61898
12918311	NA	NULL	2.55673	2.07704	2.83238	3.34753	2.69799	2.85629	3.22268	2.37972	2.34379	2.59137	3.67135	3.04077	1.8837	2.15635	2.1939	2.90894
12918313	NA	NULL	4.11159	4.55834	4.60088	4.06835	5.4512	4.56096	4.6281	4.66059	3.73966	4.16574	4.39975	4.80692	3.66952	3.53598	3.20823	2.83706
12918315	NA	NULL	5.04181	6.22937	4.66166	5.09971	5.93041	5.69448	5.48003	5.9358	5.42203	6.34077	3.53103	5.66336	6.51673	6.44499	6.37446	5.31996
12918317	NA	NULL	7.00279	7.10193	8.3011	7.90121	7.90151	7.50641	7.26444	7.48494	6.90281	7.20788	8.51262	7.74056	7.6618	7.6625	7.73218	7.83325
12918319	NA	NULL	2.73222	3.28502	3.12942	4.02567	5.10763	5.42648	3.61251	2.74562	4.18633	3.20052	3.69972	4.18374	4.53735	4.31804	4.75481	4.49033
12918321	NA	NULL	6.13072	6.11524	6.47308	6.43068	6.39998	6.09235	6.36861	6.15384	6.6209	6.25238	6.72067	6.9192	5.07811	5.9547	5.9435	5.17336
12918323	NA	NULL	5.99123	5.95849	6.35277	4.52575	5.59754	5.88392	6.55815	6.23044	6.22887	6.29359	4.66665	6.45755	6.40165	5.9	6.33403	6.34543
12918325	NA	NULL	3.93633	4.90506	3.55039	3.3252	3.92253	3.94	4.85563	4.68446	4.86754	4.7835	3.08172	4.48743	3.24304	4.19797	3.4338	3.53456
12918327	NA	NULL	5.05652	6.05177	4.20154	4.62684	5.98807	6.15602	6.31427	6.09626	5.49248	6.21455	4.33241	4.363	5.7167	6.30893	5.3691	5.89099
12918329	NA	NULL	2.94584	2.81521	3.13683	2.5006	2.9628	3.34201	3.00348	2.95892	3.29637	2.99249	2.83195	2.98766	1.96212	2.63937	2.79805	2.66427
12918331	NA	NULL	4.64204	4.29183	3.73379	4.3422	4.41992	3.92918	4.74889	4.40861	4.65001	4.23419	4.65841	4.9512	3.47315	3.59064	4.75075	4.56873
12918333	NA	NULL	2.91643	3.67928	3.0685	2.78062	2.47177	2.7417	2.89119	3.45438	2.80965	2.82557	2.88788	2.47533	2.21027	1.90719	2.74172	2.81078
12918335	NA	NULL	4.53929	4.09425	4.01779	3.42839	3.92737	3.80665	4.87017	3.47581	4.99206	4.5434	3.99079	3.94958	4.00764	3.8561	4.34632	2.98731
12918337	NA	NULL	6.65458	6.75697	6.808	6.40209	6.93182	6.81718	6.84171	6.44403	6.78697	6.84135	5.84911	6.41758	6.90333	6.09847	6.86314	6.2823
12918339	NA	NULL	3.78722	2.84659	2.19863	1.97618	3.39638	3.05696	4.05306	3.55734	4.67768	3.66984	2.76951	2.26883	2.88633	3.31173	2.98625	2.86585
12918341	NA	NULL	3.57839	4.23904	5.12401	5.69844	4.22826	4.13532	4.47647	4.03509	4.02909	3.59796	5.6506	4.33677	4.40969	4.99675	6.22234	5.106
12918343	NA	NULL	4.90604	6.01979	6.51511	5.77187	4.97929	5.02815	4.96524	5.57802	4.86107	5.87368	5.01937	5.94891	5.59371	5.94882	6.20453	5.88883
12918345	NA	NULL	1.98487	2.23499	2.08927	2.50456	2.98063	2.86807	2.8549	1.99753	2.24741	1.88491	2.11156	2.30338	3.02126	2.17995	2.08407	2.31149
12918347	NA	NULL	4.16957	3.20248	4.93311	3.78311	2.7599	3.08395	3.8247	3.37952	3.11731	3.40292	4.95521	3.60902	3.78913	4.39923	3.53736	4.01338
12918349	NA	NULL	3.29892	3.20254	4.1311	5.47057	3.22207	3.18887	2.69982	2.2944	3.4282	3.17078	4.46216	3.37934	3.94458	4.07627	3.62328	4.23339
12918351	NA	NULL	6.20787	6.21185	7.6619	7.10195	6.12101	5.65054	5.30288	5.73153	6.38729	5.60464	7.48457	7.49428	7.60952	7.1279	6.875	6.66747
12918353	NA	NULL	2.52472	2.53947	2.01461	2.59883	2.73478	2.4719	2.58493	2.70752	2.39237	2.71384	2.0952	2.20831	2.11641	2.23949	2.19293	1.84752
12918355	NA	NULL	3.77477	3.86975	5.39981	6.00611	4.01782	3.43655	4.43648	3.80038	3.2511	4.38975	5.63963	5.30016	5.71272	5.40708	5.28297	5.91983
12918357	NA	NULL	1.7594	1.92423	1.48378	1.64029	1.78182	1.61938	1.5947	2.06446	1.70141	1.82737	1.71203	2.00117	1.91729	1.66792	1.70096	2.33027
12918359	NA	NULL	3.17796	3.04891	3.4483	2.78427	2.99034	3.04375	2.99705	3.24217	2.8471	3.5972	3.67553	3.60439	3.12015	2.45762	2.97368	3.04493
12918361	NA	NULL	2.66505	3.78521	2.66106	4.26293	2.71729	3.11425	4.16586	2.9659	3.12324	3.85967	2.70016	3.84009	3.90407	3.63258	2.85349	3.65156
12918363	NA	NULL	2.94014	2.8302	2.46216	2.77944	2.62158	2.31156	3.06196	2.6325	3.18992	3.08345	3.01142	2.59181	2.60078	3.35183	2.54878	2.87482
12918365	NA	NULL	2.25801	1.79405	2.22082	1.9184	1.99768	2.33711	2.60657	2.50613	1.88431	1.87554	2.35363	2.54844	2.10797	1.94289	2.17486	2.99313
12918367	NA	NULL	1.6179	1.72164	2.01573	2.36593	1.78834	1.73249	2.05082	1.55389	2.0412	2.149	1.83003	2.13303	1.82176	1.74895	1.71173	1.71392
12918369	NA	NULL	2.14408	3.51607	5.61226	5.83036	3.51607	4.1123	2.20181	3.88468	3.88651	3.5372	3.47677	5.08834	6.9616	7.56444	6.76064	7.8792
12918371	NA	NULL	3.05869	3.87549	3.84375	4.19965	3.14183	3.3866	3.40248	3.4044	3.89711	3.09289	4.08434	4.21213	4.47186	5.11732	5.52205	5.03552
12918373	NA	NULL	5.51278	5.69175	5.99152	6.55685	5.22917	4.95675	4.75382	4.56224	4.97454	4.83098	6.72617	5.40389	5.83167	5.79971	5.48813	5.86848
12918375	NA	NULL	3.04409	2.60391	2.71845	2.62526	2.67152	2.23463	2.23912	3.04887	2.49955	3.25481	2.87648	2.34129	1.89784	2.1897	3.0194	3.23872
12918377	NA	NULL	1.66285	1.39868	3.11773	2.37541	1.6052	3.64987	1.53443	2.68294	1.46499	1.50315	3.79283	1.86737	1.98074	1.60449	1.80491	1.73137
12918379	NA	NULL	2.24031	2.79162	3.04813	4.21364	2.56039	2.86184	2.32197	2.58771	1.97068	2.65884	3.49385	3.69752	3.76875	4.15948	3.35249	4.12715
12918381	NA	NULL	2.68474	2.9247	3.12941	3.47061	2.87783	1.8645	2.69041	2.7206	2.50614	2.33029	2.81699	3.73363	2.96541	3.97117	3.979	4.07592
12918383	NA	NULL	1.96564	2.64402	3.96583	4.16344	2.31998	2.62211	2.59309	2.236	2.41562	2.03832	3.63978	3.51034	2.56692	3.5415	3.26624	4.58672
12918385	NA	NULL	2.19312	1.70433	1.78066	2.65622	2.09436	2.03095	3.08551	2.22727	1.87277	1.80031	2.90592	2.55573	5.30598	5.05367	3.55366	4.40822
12918387	NA	NULL	1.61312	1.893	1.87456	2.02365	1.7384	1.7947	1.53443	1.87919	1.40189	1.63764	1.58965	1.75218	1.80491	1.60449	1.91359	1.57849
12918389	NA	NULL	1.67231	1.80562	1.90672	1.81032	1.77304	1.63603	1.43568	1.56256	1.58736	2.00631	1.76867	1.83546	1.51944	3.00339	1.94576	1.99341
12918391	NA	NULL	6.30241	6.23965	7.60375	8.004	5.77715	6.15554	6.12659	5.90825	5.56533	6.30794	7.29238	7.51484	8.6305	8.50626	8.39332	8.47596
12918393	NA	NULL	4.85666	4.64387	5.53309	5.71855	4.28729	4.34102	4.54627	4.65235	4.393	4.78499	4.8872	4.73956	3.30239	3.18659	3.19981	3.08532
12918395	NA	NULL	2.99303	2.36998	3.47374	3.2705	2.10131	2.49958	2.89244	2.27449	2.75869	2.74275	3.98342	2.81576	4.21334	3.73285	3.49609	4.2195
12918397	NA	NULL	7.46705	2.84816	3.61435	3.88895	3.48932	4.20571	2.70079	2.14819	6.56834	2.93897	3.27851	3.27842	1.88156	2.14186	2.14531	2.80958
12918399	NA	NULL	2.47909	2.04226	2.47073	1.98048	2.04942	2.02701	1.93956	3.00742	1.9857	2.17459	2.17404	1.90557	2.24274	2.31659	2.4279	2.69476
12918401	NA	NULL	1.75268	1.95602	2.66092	1.82939	2.26545	2.01633	1.90077	2.39988	2.17439	2.04275	2.42894	2.12036	1.81345	2.07845	1.64011	1.96736
12918403	NA	NULL	1.71827	1.74616	2.11353	2.43853	1.76692	1.98034	1.52244	1.97511	1.66314	1.76166	1.70346	2.0635	1.69364	1.60462	1.56114	1.73691
12918405	NA	NULL	2.41553	2.74161	3.24792	3.94508	2.64834	2.35094	2.39355	2.98536	2.64013	2.47296	2.77211	3.65909	2.24947	3.14135	3.12249	2.00845
12918407	NA	NULL	3.25773	3.67716	4.35694	4.95671	3.05059	3.26338	3.19681	3.7849	3.47206	3.36795	4.93139	3.92172	3.18411	5.39581	4.82603	4.9889
12918409	NA	NULL	4.37928	4.36436	6.59799	5.90142	3.4952	4.24662	4.8392	3.84512	4.16076	4.30674	5.47279	5.39996	4.52129	4.32909	4.24258	4.70759
12918411	NA	NULL	2.43647	1.90872	2.21215	2.39731	2.60989	2.19156	2.20644	1.67699	1.95342	2.66263	1.89146	2.05532	2.21812	1.77828	2.26577	2.51441
12918413	NA	NULL	2.37287	1.87757	2.34119	2.24084	2.54399	2.87613	3.7063	2.9548	2.04394	2.03069	2.73387	2.0402	1.66571	2.07781	2.31238	2.62587
12918415	NA	NULL	2.00929	2.48216	1.95685	1.88072	2.09546	2.31108	2.29564	1.88649	1.7986	2.21607	1.93375	1.74026	1.82618	2.29642	1.69675	2.20499
12918417	NA	NULL	5.55385	4.58083	6.93866	7.0225	4.96612	4.85644	4.43688	3.97988	5.45714	4.50001	6.85368	6.20749	8.17724	8.1165	7.39139	7.86502
12918419	NA	NULL	1.64002	1.71843	1.50184	1.5651	1.64942	1.85624	1.78259	1.97212	1.67769	1.9358	1.5086	1.55208	1.58968	1.76087	1.51351	1.70112
12918421	NA	NULL	1.93251	1.8147	1.57955	1.60399	2.2421	1.68231	1.68969	1.89091	1.77513	1.7741	1.6303	1.53258	2.06026	1.8355	1.74897	2.07974
12918423	NA	NULL	2.7567	3.25037	5.36575	5.46276	3.36005	3.90817	2.97092	3.5051	2.76828	2.64793	3.12525	5.1777	4.41252	4.46129	3.09981	4.06315
12918425	NA	NULL	1.98244	2.52011	3.95514	4.97323	2.60725	2.70667	2.82933	2.9793	2.33908	2.61697	2.88435	3.4967	2.62579	2.28816	2.55172	2.48153
12918427	NA	NULL	2.357	3.00574	2.27827	2.08461	2.31487	1.61358	2.14471	1.89305	1.97153	2.88819	2.49591	1.91212	2.6742	2.20688	1.93201	2.23912
12918429	NA	NULL	5.42729	5.73078	3.57	3.98352	4.97908	3.87284	5.07093	5.56194	5.06207	5.56191	3.92704	5.00309	5.4071	5.25308	4.4281	3.94381
12918431	NA	NULL	3.21692	4.06176	3.45196	3.09229	3.27157	3.87479	3.43522	4.30717	3.30692	3.8108	3.11585	3.28872	3.6333	3.83775	3.71135	3.16866
12918433	NA	NULL	4.14944	4.34986	4.27849	3.55381	3.68992	3.69717	3.43769	3.87955	4.82102	4.40269	3.41935	3.68035	3.56113	4.51879	3.55927	4.3466
12918435	NA	NULL	2.93775	3.47616	1.99766	2.17408	3.52151	3.48672	2.99599	3.19794	2.32917	2.76941	2.29433	2.4661	2.62984	2.85855	1.81889	2.80961
12918437	NA	NULL	3.30684	3.80944	2.82227	1.95848	3.77776	3.92289	3.01269	4.43883	3.31118	4.68405	2.78941	2.7565	3.64216	3.51251	3.30298	4.21249
12918439	NA	NULL	3.72144	3.49688	4.29876	4.58912	3.5948	3.53166	3.96815	4.86709	4.20305	3.8675	4.13803	4.66965	5.34675	4.94738	4.48492	4.65558
12918441	NA	NULL	3.43819	4.06603	4.9025	3.93139	3.86094	3.25321	3.69515	3.9629	4.11904	3.98915	3.92862	4.20057	3.89016	3.5812	3.42928	4.71577
12918443	NA	NULL	3.43794	4.22227	5.02801	4.48808	3.9264	4.92414	3.976	5.20431	4.39814	5.13049	4.44256	5.04097	5.54322	5.72999	5.06913	5.04097
12918445	NA	NULL	3.011	2.52682	3.27092	2.68713	2.92102	1.67825	3.18143	2.21764	2.57975	2.89294	2.32021	2.28192	3.52925	2.35608	2.74582	3.15744
12918447	NA	NULL	4.25533	5.33299	6.4621	6.6209	4.44852	4.44724	4.84042	4.20452	4.81668	4.75002	5.20513	6.07783	6.86312	6.7691	6.45769	6.25464
12918449	NA	NULL	1.7568	1.75611	1.51757	1.8171	1.56613	1.76118	1.50899	1.65293	1.74286	1.59133	2.02999	1.53628	2.02911	1.97766	1.95013	1.65299
12918451	NA	NULL	1.68506	2.17118	2.3316	2.08859	1.89	1.78791	2.16494	2.35413	2.11286	1.7064	2.3154	2.07406	3.46384	2.41763	2.05303	2.10764
12918453	NA	NULL	1.95913	3.25085	3.18586	4.03188	1.74456	2.27959	3.19567	3.2246	2.22537	3.79835	1.86148	3.14747	3.87737	2.61832	4.14808	4.03069
12918455	NA	NULL	2.42349	3.55223	3.5043	2.03187	3.44206	3.14078	2.85789	3.65555	2.13095	3.03686	2.25295	2.24851	3.00682	3.3743	2.73248	2.95581
12918457	NA	NULL	1.64148	1.80025	1.80762	2.12535	1.7918	1.57952	1.69022	2.147	1.52799	1.53873	2.4698	1.79754	1.72892	1.82912	1.65352	1.88116
12918459	NA	NULL	1.55185	1.81846	1.56385	1.46861	1.48268	1.49031	2.72234	2.1142	1.49006	1.39126	1.61882	1.46642	1.65064	1.62787	1.38708	1.83235
12918461	NA	NULL	1.90895	1.75743	2.44646	2.63411	3.08833	2.41978	1.97752	2.05551	1.76698	2.26998	2.09564	2.8108	3.20703	2.73918	2.54265	2.68062
12918463	NA	NULL	3.26576	3.30896	3.44321	4.24146	3.2413	3.34678	4.27534	3.6841	2.96691	3.28782	5.24887	3.85861	3.12829	3.03818	3.02795	2.98431
12918465	NA	NULL	5.11024	5.01283	7.22908	6.96521	4.41585	4.166	4.76733	4.82482	4.16066	5.08643	5.41234	5.82028	6.0552	5.93359	5.20875	6.12152
12918467	NA	NULL	2.18377	2.59443	2.01137	1.78621	1.92524	2.27278	4.14647	3.03626	2.39941	2.31998	1.60788	1.95843	2.43729	2.11055	2.01165	2.8695
12918469	NA	NULL	2.91366	3.04165	2.56167	2.11497	2.79962	3.18643	3.16479	3.0512	2.59963	3.52852	2.76041	2.2056	2.57645	3.18088	3.35604	3.1782
12918471	NA	NULL	2.56547	2.61043	2.73845	2.58242	2.62212	2.22471	3.60184	3.51509	2.65433	2.44036	2.13615	2.5274	3.58236	3.48146	2.95649	2.83887
12918473	NA	NULL	2.12945	1.56137	2.49018	3.33556	1.92477	1.65326	1.96456	1.81963	1.96025	1.99128	2.49898	2.93799	1.66107	1.85554	1.91782	2.14799
12918475	NA	NULL	2.6048	2.74731	3.05712	3.05903	2.73044	2.59856	2.61386	3.59883	2.3476	2.9479	2.78162	3.05881	3.33339	3.45644	3.39613	2.90388
12918477	NA	NULL	1.99028	2.27055	3.85974	2.43047	2.4413	2.29097	2.55459	1.72692	2.10209	2.07492	2.53001	2.4471	2.59348	2.40995	3.623	2.77408
12918479	NA	NULL	3.6679	2.37077	3.51413	5.0632	2.44522	2.38567	3.00034	2.71429	3.5881	2.41767	5.16884	3.83936	2.30083	3.00706	2.22634	3.03814
12918481	NA	NULL	5.17423	4.84824	5.90079	6.8822	5.45623	5.49479	5.5529	4.32217	5.40523	5.35985	6.38556	6.00277	5.93038	5.54782	4.92576	5.72522
12918483	NA	NULL	4.52299	5.1652	5.9739	5.66236	4.20296	4.48196	4.80427	4.11664	4.83485	4.69264	5.43195	4.81731	5.81174	5.10564	5.22158	5.87239
12918485	NA	NULL	1.85163	2.01626	2.23562	1.91032	1.63344	1.79072	1.90951	1.68911	1.70017	1.79131	1.57136	1.98982	1.89393	2.70626	2.10577	2.57435
12918487	NA	NULL	1.76327	1.72812	1.57851	2.05963	1.8212	1.86664	1.83787	1.70482	1.63252	1.69004	2.08813	2.11956	1.90815	1.49891	1.65006	1.69917
12918489	NA	NULL	5.51317	5.10792	6.91637	5.67476	5.12627	4.6939	5.21276	5.12092	5.24132	4.61987	6.29196	6.25621	6.19914	6.51247	6.70616	5.88922
12918491	NA	NULL	2.59361	2.75577	4.0811	3.32173	1.95632	2.54753	3.05564	2.87981	2.75772	2.62289	3.68312	4.05438	6.06464	4.92689	4.52228	5.25703
12918493	NA	NULL	4.55072	5.16265	6.51607	6.33061	4.83063	4.40409	4.55482	4.93125	4.8537	4.99125	6.13566	5.53222	5.62076	5.82232	5.35569	6.14703
12918495	NA	NULL	1.8455	1.84372	2.16759	1.76529	1.86468	1.75412	1.72328	1.79837	1.80412	1.83142	1.76202	1.87854	2.06618	2.02057	1.87746	1.84911
12918497	NA	NULL	2.65958	2.32203	4.93092	3.86864	1.79013	2.13873	2.63415	2.4283	2.15823	1.80121	3.15594	3.44228	2.87301	2.79636	2.97618	2.60304
12918499	NA	NULL	4.57413	4.50925	5.10263	5.48092	4.78168	5.18559	4.80337	5.17975	3.79589	4.77928	4.4264	5.08635	6.9549	6.97926	7.14989	6.72247
12918501	NA	NULL	4.58232	3.84259	4.33007	3.86804	4.99388	4.47228	4.66863	5.0265	3.91647	4.47615	4.31454	2.96635	2.98129	2.69313	3.15825	2.66641
12918503	NA	NULL	1.76079	1.42801	1.79456	1.77188	1.89769	1.85458	1.97637	1.72277	1.76797	1.59211	2.16434	1.74657	2.07143	2.78359	2.75662	2.86719
12918505	NA	NULL	2.17166	2.65869	2.64356	2.44325	2.06161	2.03001	2.31058	2.33486	2.11401	2.07698	2.47499	2.19776	3.29245	2.27108	2.27831	2.67004
12918507	NA	NULL	3.25254	4.43347	4.91494	5.43224	3.38899	4.26569	3.22024	4.16414	2.9335	4.45498	2.91393	3.87921	4.52243	4.72173	4.67249	5.36626
12918509	NA	NULL	3.13646	3.49804	3.01542	3.93065	2.98913	3.74693	3.33892	3.84609	3.232	3.64885	4.30452	3.35236	2.66564	2.97553	2.94441	3.2143
12918511	NA	NULL	1.58736	1.52525	1.65299	2.00886	2.10131	2.1897	1.68875	1.72266	1.69893	1.38953	2.13475	3.56848	1.84058	2.26863	1.81938	1.75329
12918513	NA	NULL	3.92985	2.64417	3.95265	5.2198	2.40391	3.16783	4.73823	2.87468	3.75625	3.17071	6.36137	3.64596	2.60024	3.72076	3.47342	3.17632
12918515	NA	NULL	1.87257	1.85954	2.15426	1.90592	1.9139	1.8837	1.92743	2.23597	1.51983	2.22747	1.59878	2.37963	2.73118	2.67474	2.93642	2.50579
12918517	NA	NULL	1.70937	2.24374	3.11773	2.24048	2.06101	2.42156	2.06043	2.06669	1.98627	2.33907	1.86903	1.95632	2.08367	1.86543	1.81737	2.53862
12918519	NA	NULL	1.83568	2.04659	2.01598	1.84527	1.74195	1.75726	2.07506	1.92161	1.67272	1.7777	1.71308	1.67334	1.9846	1.88222	2.38382	2.24884
12918521	NA	NULL	2.15224	1.69761	3.13771	2.01558	2.00902	1.96134	2.02992	2.26964	1.92333	2.05381	2.01788	2.06558	2.05374	3.39034	2.19767	2.62555
12918523	NA	NULL	1.80547	1.81595	1.88955	2.59602	1.71391	2.40152	2.16519	3.01048	1.91503	1.62105	2.51646	2.18233	3.0936	2.29027	2.48501	2.71647
12918525	NA	NULL	2.40854	3.80621	5.45862	3.95195	2.85549	2.05011	3.85165	3.25085	3.37674	2.79308	3.60613	4.48769	5.56642	5.17469	4.81802	4.79997
12918527	NA	NULL	2.66417	2.76491	3.53881	4.02442	2.43869	2.25399	4.12048	2.57411	3.36423	3.25481	2.92028	3.07565	2.47683	3.03611	2.97748	3.45028
12918529	NA	NULL	3.76671	4.07851	3.78054	3.72777	3.22172	2.85518	3.72564	3.46482	3.04483	3.31374	3.45337	3.37675	5.84447	5.60477	4.9941	5.90818
12918531	NA	NULL	2.26727	2.4553	1.9472	2.24439	2.03637	2.03834	2.04401	2.18453	2.12789	2.21642	1.8987	1.831	1.89771	2.57797	2.19975	2.83907
12918533	NA	NULL	2.6731	1.91118	2.82841	2.79686	1.79183	1.78464	1.9634	2.01975	2.15409	2.21884	4.1572	1.98833	1.77972	1.82515	1.99978	1.60135
12918535	NA	NULL	1.86292	1.88058	1.7935	1.79193	1.75359	1.91581	2.21179	1.97275	1.78353	2.07808	1.69522	1.73768	1.76848	1.81013	1.82834	1.86576
12918537	NA	NULL	1.80698	1.68655	2.05274	2.267	1.75173	1.63508	1.88108	1.73655	1.8704	1.69029	1.5725	1.64017	2.91161	1.88462	1.91932	1.95258
12918539	NA	NULL	2.73974	2.02498	4.2023	2.01951	2.35968	2.73939	3.26314	2.50536	3.49315	3.09286	2.2836	2.68585	4.67949	4.5545	4.0672	4.84639
12918541	NA	NULL	2.26998	3.31625	3.18405	4.37001	3.20425	3.18963	3.50176	3.21844	4.03565	3.35983	3.49624	2.949	4.47078	3.54277	4.61208	4.6649
12918543	NA	NULL	3.3976	4.05409	3.18138	3.68923	2.49573	2.67087	3.21107	4.032	3.15284	4.05065	2.42725	2.83806	4.6306	4.4927	4.18454	4.86524
12918545	NA	NULL	4.37427	4.10462	5.33098	4.0735	3.91352	4.43989	4.61545	3.55057	4.68064	4.80748	3.46372	4.29222	5.30132	6.12458	6.09836	5.41428
12918547	NA	NULL	4.70343	5.79634	6.77675	6.72117	4.68091	4.98176	5.76221	5.48937	4.53062	5.50468	6.54337	6.01478	6.91822	7.939	7.35706	7.49757
12918549	NA	NULL	3.27154	3.69062	4.00069	4.26742	3.16226	3.16413	3.55422	3.94849	3.44333	3.96476	4.1255	3.66934	4.44915	4.18659	3.83419	4.61975
12918551	NA	NULL	3.74538	3.98642	5.77859	6.21112	3.94418	4.34509	3.71064	4.81737	4.03951	4.84596	5.59955	5.62464	5.31365	5.89686	6.09313	5.12832
12918553	NA	NULL	7.86931	7.79704	9.88232	10.1124	7.1851	7.26789	6.88991	7.56435	7.29699	7.25828	8.6915	9.48841	9.84297	9.84419	9.73205	9.749
12918555	NA	NULL	3.85678	4.26786	5.53643	5.33565	4.38476	3.77239	4.97227	3.50876	3.44148	4.03098	4.66291	5.24505	5.33099	4.58236	4.71932	5.04045
12918557	NA	NULL	2.35513	2.8071	3.05207	2.79209	2.47223	3.25784	2.17394	2.51902	2.49415	2.56256	3.56115	2.71246	3.96605	3.9876	3.50305	3.38723
12918559	NA	NULL	3.56548	2.60323	4.41709	3.45333	3.03412	2.73513	4.3719	3.17969	3.44537	3.93569	2.89488	4.02206	5.46213	5.25157	5.76642	5.10734
12918561	NA	NULL	2.58697	2.37998	2.90342	2.56661	1.80474	1.97049	2.18188	2.08125	2.45266	2.53484	2.10138	3.4777	2.80042	2.52691	2.64261	2.37242
12918563	NA	NULL	3.93608	4.37026	4.67749	6.13962	4.62368	3.95032	4.32168	4.46755	4.76083	4.24619	4.82342	5.30033	6.3896	5.92909	6.07849	6.00297
12918565	NA	NULL	4.9802	3.90304	3.82051	4.17822	4.47878	4.76017	4.89138	3.76135	4.73138	4.0881	3.73507	3.69383	4.00361	4.77245	4.00897	5.26425
12918567	NA	NULL	2.93026	2.71255	2.85833	3.22498	2.47179	2.13628	2.96008	2.36662	2.49382	2.95571	2.60677	2.89305	2.88026	2.97806	3.38707	3.03504
12918569	NA	NULL	2.39084	2.10645	2.76736	2.31775	2.61126	2.33873	3.03125	2.54798	2.28338	2.35477	2.34222	2.40327	3.1103	2.29989	2.0627	2.44541
12918571	NA	NULL	1.58615	2.25637	1.67434	1.64136	1.65911	1.90658	1.78504	1.89741	1.52873	1.74774	1.76089	1.71668	1.55956	1.86126	1.69385	1.85797
12918573	NA	NULL	3.07585	2.89463	2.59015	2.8111	2.54508	3.45414	3.1514	3.11319	2.98564	3.35049	2.87683	3.11773	3.53943	3.39549	3.43611	3.177
12918575	NA	NULL	1.5764	2.00319	2.02653	2.17262	2.19523	2.12995	1.88315	2.34576	1.695	1.79563	1.9244	2.05748	2.15908	1.9785	2.20748	2.25829
12918577	NA	NULL	2.89848	2.69082	2.62889	3.25862	1.89598	2.46564	3.05749	1.73545	2.50678	1.6631	1.79562	1.99679	3.71591	2.90066	3.77243	5.00692
12918579	NA	NULL	2.15572	2.55783	2.03417	2.09726	2.53975	2.28242	2.32531	2.3099	2.71085	2.77029	2.28903	2.08743	2.32697	2.27703	2.42186	2.09613
12918581	NA	NULL	2.57965	2.89135	3.34047	4.00975	4.21532	3.51046	3.82743	2.59843	2.88721	2.64148	3.36434	3.65573	4.42261	5.37518	3.43227	3.86471
12918583	NA	NULL	6.01638	5.59611	5.07836	6.73954	5.30249	5.29068	5.83477	5.3429	5.29751	4.80012	5.29638	6.13693	5.45322	6.9129	6.12549	6.28286
12918585	NA	NULL	2.22475	2.07493	2.16894	1.97521	2.20274	2.0684	2.9038	2.1956	2.14359	2.92614	1.94471	1.79573	2.15416	1.93128	2.77669	3.00582
12918587	NA	NULL	2.67657	2.78574	3.59929	3.36621	2.52248	2.93692	3.57202	3.31991	2.97097	3.46511	3.50823	3.16913	3.67433	3.89379	3.33374	3.84443
12918589	NA	NULL	5.2755	5.96391	6.25656	6.48176	5.70388	5.45953	6.08208	6.45952	5.63786	6.49122	6.30967	6.05103	7.31909	7.59129	7.34608	7.59305
12918591	NA	NULL	1.93867	3.26816	2.8717	2.93834	2.47347	2.74491	2.46879	3.3317	2.09081	2.74615	2.29227	3.57005	3.23404	3.31548	3.7255	2.57778
12918593	NA	NULL	1.84968	2.04226	1.63193	2.1107	2.16507	1.99588	2.67242	2.04834	2.42794	2.20507	1.95015	2.05028	1.88668	2.11282	2.45633	2.57842
12918595	NA	NULL	2.47522	2.27017	2.14867	2.17207	2.20434	2.19005	2.64409	2.46006	2.07909	1.97391	2.51079	2.41302	2.25042	2.88977	2.99288	3.01297
12918597	NA	NULL	3.98511	3.41305	3.68883	3.7056	3.41987	3.43661	3.32659	2.87605	3.46228	3.46181	3.41948	3.52529	4.56725	3.3331	4.15262	4.30685
12918599	NA	NULL	4.39893	3.91181	5.18287	5.62046	4.20603	4.2964	4.61163	3.88022	4.13743	4.31841	4.93804	4.93085	4.7898	4.89942	4.6394	4.93831
12918601	NA	NULL	2.50827	1.97708	3.08939	2.89446	2.59402	2.33715	3.53852	3.72081	1.95196	2.68538	3.35945	2.8121	3.83673	3.48428	3.39676	3.67727
12918603	NA	NULL	3.94158	4.33951	4.64433	2.97958	4.49784	4.35409	4.6297	4.26873	4.59249	4.66231	3.79582	4.53247	4.32495	4.18689	4.46278	4.34189
12918605	NA	NULL	3.33501	3.33956	4.66435	4.09751	3.22354	3.44414	4.61	4.20808	4.60085	4.08701	3.94932	4.5769	3.94586	4.9459	3.51392	4.95248
12918607	NA	NULL	2.03227	3.04748	2.23275	3.3086	2.03329	1.64289	2.68085	2.53744	1.84242	2.19648	2.39335	1.87347	2.41072	1.8337	1.85292	2.46593
12918609	NA	NULL	4.25547	4.28528	3.85249	5.44059	3.76539	3.71219	3.94734	4.19983	3.55132	4.23851	3.6234	4.3329	4.87364	5.02287	4.28518	4.36526
12918611	NA	NULL	3.09508	3.01647	3.37937	3.62647	2.33989	3.27237	2.8447	3.06612	3.13312	3.49355	3.82156	2.87042	1.9831	3.1324	2.48685	2.86818
12918613	NA	NULL	2.31968	2.97982	3.24089	3.15613	2.23623	2.03058	3.06619	2.72883	2.97859	3.74801	2.77868	3.51761	3.4669	3.06823	3.51161	3.58525
12918615	NA	NULL	2.22051	2.63233	3.44272	2.28548	2.30617	2.26317	2.23138	2.24948	1.92163	2.60834	1.98939	2.88583	2.25978	2.1763	2.68773	2.86217
12918617	NA	NULL	3.37919	2.46842	3.14822	2.52795	2.82719	2.3126	3.28095	1.85528	2.84655	3.20464	3.4137	4.06196	3.21647	3.3551	3.63297	2.66739
12918619	NA	NULL	1.80829	1.92813	2.47189	1.99263	2.00699	1.91287	2.21475	2.0557	2.1728	2.11698	1.80402	1.90009	2.07566	1.88968	2.06461	2.05917
12918621	NA	NULL	6.39948	6.31745	8.50857	8.13966	5.36402	5.73072	6.14732	6.59265	5.57158	6.26341	7.26796	7.6942	7.60803	7.93022	7.74106	8.30588
12918623	NA	NULL	1.82253	1.8144	3.4458	3.70316	2.45878	2.32753	2.39359	1.97564	3.20197	2.4592	3.80331	3.905	3.23433	3.60597	3.69766	3.73033
12918625	NA	NULL	1.71426	2.0536	1.61957	1.59969	1.82383	1.59383	1.76674	2.10266	2.07255	1.6485	1.82288	1.83393	2.10036	1.67904	1.86768	1.85426
12918627	NA	NULL	2.3981	2.30066	2.92336	2.81297	2.02026	1.98709	2.7606	2.42562	2.71316	2.63504	2.3361	2.03213	2.97894	3.0529	2.63889	2.84095
12918629	NA	NULL	3.24333	3.18236	4.09047	3.40917	3.68559	3.46384	3.31465	3.83947	3.20292	4.60799	2.70469	3.27974	4.89164	3.47308	3.11419	3.93651
12918631	NA	NULL	3.51978	3.71154	4.63231	4.40269	2.64142	3.60705	3.75661	2.48476	3.7199	3.86363	3.98093	4.93987	4.19584	4.40085	4.03206	4.47387
12918633	NA	NULL	3.66579	3.67256	4.03761	4.62836	2.72433	3.00636	3.76357	3.42063	2.98272	3.99791	3.39857	3.59253	3.95024	4.18015	3.9917	5.15568
12918635	NA	NULL	2.85619	2.62099	3.72255	4.59157	2.78459	2.9984	2.88043	2.77691	3.44905	2.72017	3.99327	3.723	3.46537	2.64404	3.01245	2.72678
12918637	NA	NULL	3.18951	4.59475	4.80495	3.82337	3.73026	4.03304	4.61245	3.98267	2.8991	4.70809	4.49681	3.07827	3.91305	5.06497	5.17939	4.15348
12918639	NA	NULL	3.23459	3.40327	3.42179	3.81629	3.06963	2.7396	3.92776	3.6124	2.68346	4.02929	4.20815	3.70836	3.27391	3.56776	3.09907	3.38836
12918641	NA	NULL	3.10413	2.86383	2.66214	2.7395	3.04361	2.68902	2.12824	2.88041	2.99144	2.87678	1.9149	2.93302	2.59974	2.4459	3.01636	3.27247
12918643	NA	NULL	4.70365	5.80003	5.64895	6.3634	3.47341	5.40058	5.36561	5.84086	5.4624	5.58713	5.35607	5.63369	6.67526	4.75868	5.36696	5.66197
12918645	NA	NULL	3.02604	4.87669	5.05913	4.6224	3.23701	4.79792	4.01837	3.2254	3.51392	4.92256	3.41063	4.11548	3.83656	4.57185	3.89065	3.88468
12918647	NA	NULL	4.4732	5.85716	5.76894	6.87721	5.55749	5.55973	5.59625	5.45462	5.07185	5.55315	5.51648	6.52958	5.57864	6.08107	5.15531	5.69957
12918649	NA	NULL	3.1972	2.05283	3.41136	4.48271	2.9309	3.68119	4.40468	3.46587	3.55695	3.43501	3.37949	3.91959	3.80996	4.52135	4.47269	3.20817
12918651	NA	NULL	1.57339	1.70944	2.4038	1.86211	1.81901	1.45192	1.75368	1.76756	1.73231	2.20736	1.66527	1.81933	1.67022	1.75042	1.61748	2.19208
12918653	NA	NULL	4.42325	2.85629	4.47963	4.43847	4.08444	4.41647	4.83254	4.58231	4.52416	3.81241	4.19456	4.20238	5.1816	5.70393	4.65358	5.23268
12918655	NA	NULL	7.42307	7.94409	7.60941	8.57478	5.65902	6.42557	6.3264	7.32486	6.3149	7.54916	7.97743	7.87748	7.7819	7.83143	7.79198	7.73695
12918657	NA	NULL	2.34913	2.30396	2.05056	2.3222	2.47801	2.72871	2.79245	2.29531	2.6366	2.26564	2.25744	2.64366	4.00043	3.53378	3.69757	3.28382
12918659	NA	NULL	2.86398	3.92118	3.44999	3.05504	3.76041	3.90693	4.06083	3.45116	3.08233	4.14693	4.43226	2.87939	2.51415	2.96202	2.49562	2.79456
12918661	NA	NULL	1.55676	1.92652	1.61106	1.97828	1.70188	1.64256	1.84069	1.62338	1.85311	1.56714	1.80917	1.76258	1.56453	1.71843	1.88482	1.59318
12918663	NA	NULL	1.89854	3.35196	1.58088	1.62897	2.72433	1.88632	1.53443	3.0766	1.92746	2.41237	2.00184	2.22948	2.93548	1.52525	2.0402	1.57849
12918665	NA	NULL	3.1891	3.23615	1.94403	1.61346	2.91207	2.57746	3.57666	2.91857	3.27105	3.32538	1.83924	2.14608	2.41079	4.21134	2.65826	3.24192
12918667	NA	NULL	2.58856	2.75813	3.2499	5.08654	2.63204	2.71773	3.10727	2.47945	3.04095	2.6964	2.84001	3.86502	5.03045	4.26461	4.14878	4.73081
12918669	NA	NULL	2.5259	2.21496	2.54278	2.20203	2.41972	2.45527	2.54191	2.07358	2.43148	1.91235	1.97156	2.6137	1.94185	2.70752	2.22122	2.61711
12918671	NA	NULL	2.18317	1.8067	3.2795	2.23871	2.37747	1.88795	2.56395	1.63932	2.09249	1.52202	1.76614	2.55006	1.55784	2.07901	3.45593	3.10311
12918673	NA	NULL	4.4565	4.01962	5.11055	5.50625	4.06528	3.43337	4.33909	4.62598	4.25569	3.69833	5.85054	5.16981	4.45623	4.5988	5.4041	5.63358
12918675	NA	NULL	3.56576	4.40192	4.93319	4.26345	4.09934	4.39352	3.46784	4.04469	3.52339	3.94349	4.29369	4.6113	4.34578	4.26177	3.60962	4.25159
12918677	NA	NULL	4.14834	4.68567	4.89143	4.8615	4.5018	4.23696	4.63767	4.39624	4.79695	4.50463	5.79849	5.17094	4.2645	5.04705	4.66695	3.88815
12918679	NA	NULL	5.52311	4.92286	4.05634	3.05619	5.30938	5.17118	4.68137	4.38895	5.55236	4.71594	4.66048	4.10646	2.02368	2.67695	2.23316	2.29105
12918681	NA	NULL	1.64189	1.63613	1.7305	1.49727	1.53053	1.63357	1.59944	1.93579	1.65527	1.77914	1.63513	1.7399	1.61645	1.67901	1.55903	1.93399
12918683	NA	NULL	3.73022	3.92599	3.7447	4.42066	3.17036	3.53314	3.91806	2.44506	2.9486	3.64644	4.43907	3.41879	4.4818	4.37308	3.61282	4.10938
12918685	NA	NULL	4.16467	4.64942	5.53729	5.4748	4.40639	4.99626	4.60341	5.03796	5.06829	5.30154	4.4773	5.23921	5.68627	5.01047	5.55149	4.35823
12918687	NA	NULL	3.7806	3.95293	4.70678	5.00296	3.79014	4.07985	4.24468	4.15813	3.94642	4.1475	5.0643	4.73746	4.40916	4.61768	4.57196	5.06171
12918689	NA	NULL	1.77585	1.91559	1.77304	1.98074	2.21805	2.10308	1.47677	1.98755	1.50611	2.21866	2.0402	1.96463	2.14548	1.69255	2.00789	2.21393
12918691	NA	NULL	1.6319	1.59351	1.6913	1.88397	1.6489	1.61777	1.68875	1.64943	1.64217	1.52894	1.6664	1.6146	1.70859	1.67787	1.90097	1.74172
12918693	NA	NULL	2.20607	2.11214	3.851	2.38797	2.14408	2.23463	3.47214	2.49455	2.87446	3.20495	2.91064	2.88633	2.23912	2.62708	2.60477	2.63487
12918695	NA	NULL	2.92148	2.87259	3.89662	3.19118	3.99555	3.79894	3.41452	4.11574	3.8963	3.47545	4.91411	4.56861	4.65519	5.31243	4.65033	4.9504
12918697	NA	NULL	2.06217	2.53221	2.09119	1.82336	2.17223	1.91035	2.04539	1.88864	1.79136	2.25591	1.89728	1.89948	2.8625	2.24385	2.16612	1.6254
12918699	NA	NULL	6.20162	6.88233	8.18688	8.26488	6.23392	6.03772	6.73358	6.33598	6.13894	6.43899	7.60504	7.72683	7.77355	7.68847	7.38404	7.80439
12918701	NA	NULL	4.52412	3.61261	2.84204	2.11677	2.59351	2.46669	4.80227	4.89907	3.66242	3.75126	1.89748	2.31989	3.73437	3.85357	3.54152	3.48505
12918703	NA	NULL	5.204	3.99148	4.52286	4.32337	4.50947	4.45622	4.69543	4.34452	4.08838	4.51942	3.37381	4.61733	3.81056	3.10297	3.68695	3.92477
12918705	NA	NULL	2.508	2.32838	2.47426	3.47643	1.96753	2.81	2.8641	1.96898	2.89859	2.68738	3.75536	2.4384	2.17563	2.484	2.19376	2.31979
12918707	NA	NULL	3.00492	2.42244	2.17626	2.28394	2.54399	2.47851	2.54559	2.74154	2.61477	2.55343	1.90673	2.76363	2.60391	2.27144	2.00789	1.89784
12918709	NA	NULL	2.58039	3.17277	3.18043	3.79231	3.12795	3.10554	3.71182	2.99418	3.24404	3.27549	2.60421	3.35853	3.50606	3.11714	3.9481	3.32831
12918711	NA	NULL	1.80491	1.6334	1.75996	2.1738	1.80139	1.50315	2.58238	2.35413	1.71321	1.84	1.90198	1.74358	1.68875	1.87919	2.06897	1.73137
12918713	NA	NULL	4.65159	5.08241	6.2069	6.27249	5.43669	4.39826	5.37135	4.62377	4.35685	5.02267	5.46895	5.48623	6.72971	7.10198	6.4811	7.04711
12918715	NA	NULL	1.95848	2.10131	2.3316	2.13618	1.60207	1.88632	1.64781	1.69989	1.928	1.76297	2.34129	2.6987	1.664	2.05983	1.61224	1.41794
12918717	NA	NULL	2.3072	2.85447	1.84942	2.09121	2.34723	2.40668	2.24764	1.88812	2.20658	1.96463	3.25092	1.90918	2.24227	2.3316	3.5771	3.05585
12918719	NA	NULL	1.93793	1.90666	1.81642	1.55617	1.66716	1.96637	2.24937	1.71541	1.87989	1.87757	2.06892	2.36175	2.28549	3.55882	2.33378	2.88756
12918721	NA	NULL	1.95144	1.82617	1.72115	2.24443	1.87006	1.57755	1.98727	1.62024	2.13895	1.6561	1.82058	1.72725	2.16239	2.36924	1.98528	2.08925
12918723	NA	NULL	1.89176	1.90358	1.95089	1.54237	1.90781	1.58295	1.72713	2.17096	1.77092	1.91402	1.52911	2.34835	2.01	2.31507	1.54774	1.98671
12918725	NA	NULL	1.41369	1.71079	1.43568	1.36783	1.91286	1.41646	1.78993	1.74877	1.39069	1.70473	1.49006	1.30777	1.46721	1.69255	1.38015	1.55653
12918727	NA	NULL	1.85596	1.51247	1.55594	1.83234	1.74948	1.86705	1.73981	1.46997	1.54462	1.74856	1.53467	1.7589	1.49626	1.5238	1.74696	1.88765
12918729	NA	NULL	2.51206	3.24183	3.31971	4.08395	2.71928	3.29444	3.2268	3.28696	3.07685	3.08977	2.85561	2.66151	4.70726	4.05479	4.05538	5.31088
12918731	NA	NULL	2.71902	3.41857	4.07071	3.49267	2.49588	2.44971	2.99603	2.63992	3.52274	3.34529	3.36602	3.20183	3.99212	3.52425	4.35598	4.41787
12918733	NA	NULL	2.10354	2.59716	2.90067	2.97944	1.89715	2.26835	2.28646	2.47256	2.24714	2.59357	2.21461	2.53918	2.31536	3.17533	2.70826	3.01068
12918735	NA	NULL	3.36967	4.32216	3.70164	3.08361	3.99383	3.8679	3.72362	3.64077	3.45253	4.04302	5.0097	3.12853	2.85924	3.0766	3.46868	3.66902
12918737	NA	NULL	2.22138	1.78863	1.60449	2.16021	1.80139	2.1897	1.85627	1.5883	1.49006	1.3153	2.13475	1.6146	1.66571	1.63116	1.63513	1.55653
12918739	NA	NULL	3.46351	3.68712	4.0304	3.15918	2.98462	3.43007	4.28191	2.77033	3.06664	3.73747	2.76703	3.08213	4.5843	3.66275	4.75472	4.54111
12918741	NA	NULL	2.43702	2.53104	2.68754	2.50983	2.92943	2.39792	2.56601	2.00741	2.48959	2.34949	2.5311	2.07235	2.2763	1.91885	2.48377	2.77762
12918743	NA	NULL	4.28421	4.15548	5.30279	4.49061	3.98416	3.87468	4.27264	4.85797	3.83605	4.15043	5.13792	4.65722	5.28042	4.34326	4.89162	3.56614
12918745	NA	NULL	2.68893	3.28519	3.87279	2.80365	2.38498	1.95942	2.58144	2.35975	2.91639	3.61859	2.56225	2.05442	2.82475	4.01077	3.15674	3.08378
12918747	NA	NULL	4.49852	5.21169	4.67703	5.18818	4.69044	4.90502	5.40706	5.49735	5.1185	4.90823	4.71937	5.23115	5.40732	4.73995	5.17897	5.1518
12918749	NA	NULL	3.12116	3.27772	3.28535	3.91149	4.11341	4.60213	4.51977	4.48925	4.05167	4.13249	4.53202	4.9529	5.10496	4.34254	4.40852	4.4699
12918751	NA	NULL	9.0825	8.26969	9.87229	10.0757	7.52936	7.46932	8.63418	8.30871	8.91234	8.03628	9.93238	9.21374	8.82813	8.75637	8.92056	8.88181
12918753	NA	NULL	2.05726	2.13099	2.63071	2.57665	1.89362	1.85584	1.81664	2.11202	1.89708	2.47184	2.32173	2.22245	2.97872	3.00198	3.08177	4.00042
12918755	NA	NULL	3.56816	3.9307	5.5116	4.48006	3.33698	3.38908	3.46008	4.55348	3.76449	4.3869	4.16452	4.58177	4.60806	5.00807	5.38923	4.89616
12918757	NA	NULL	2.25149	3.03441	2.56811	3.24897	2.45975	1.95048	2.59021	2.5373	2.50688	2.55026	2.68811	2.51706	1.93793	2.1369	2.32624	2.37224
12918759	NA	NULL	2.67713	2.66769	2.65787	1.91104	2.21239	2.19835	2.3431	2.26387	2.55732	2.50769	2.14618	2.26498	2.28722	2.3117	2.23674	2.12456
12918761	NA	NULL	1.65955	1.48384	1.78109	1.75946	1.50544	1.77471	1.47306	1.58025	1.70046	1.61473	1.62456	1.57355	1.79279	1.6792	1.54524	1.92424
12918763	NA	NULL	1.67244	1.94002	2.50739	1.99358	1.55257	1.60334	1.88534	1.75526	1.55325	1.63323	1.90153	1.63244	2.05176	2.88429	1.8001	2.47852
12918765	NA	NULL	2.91768	3.10622	3.9556	3.65851	1.98534	2.35117	3.0223	2.96748	2.59596	3.29323	2.80988	3.09808	3.12605	3.7981	4.16197	3.83004
12918767	NA	NULL	2.64204	3.69105	3.94256	3.61389	2.48566	3.67275	3.59416	3.38541	4.2242	3.84609	3.45846	3.71105	4.99777	4.48992	4.98899	4.28514
12918769	NA	NULL	1.78368	1.77852	1.7963	1.9306	1.84846	2.0064	1.94615	1.62593	1.9388	2.5211	2.02722	1.57687	1.47102	1.83985	1.51267	1.63804
12918771	NA	NULL	2.94803	3.1366	3.40282	4.04844	3.1604	3.54885	2.4084	2.60159	3.12094	3.29969	3.10545	4.68495	3.61951	3.36958	3.12441	3.24946
12918773	NA	NULL	4.28033	4.19072	5.44823	5.67772	3.72857	4.20819	3.86087	4.88579	4.14236	4.85478	5.30381	4.87565	5.40783	5.91401	5.58354	5.7757
12918775	NA	NULL	3.21893	3.41296	3.11408	3.01207	3.81709	2.97404	2.88576	3.54349	2.96966	3.41138	3.76951	3.21379	3.05882	3.12766	3.18829	2.92449
12918777	NA	NULL	3.67604	3.87574	3.55518	4.11513	3.74638	4.55334	4.05107	4.20689	4.27994	4.53078	4.4516	3.50781	4.89849	4.89984	4.92315	3.97401
12918779	NA	NULL	4.4604	4.72173	5.56546	6.13769	4.82635	5.26173	5.29611	5.18433	5.36473	5.63006	5.28457	5.89723	5.70715	5.83746	6.09297	5.88058
12918781	NA	NULL	4.4967	5.12177	5.066	4.44748	4.15069	5.01361	5.33873	5.13186	3.83636	5.2268	4.05545	5.22397	6.03617	5.79546	6.15287	6.63984
12918783	NA	NULL	4.24497	3.87836	6.12836	6.54545	4.06912	3.69046	3.5956	4.66844	4.78513	3.42701	6.01593	5.39463	3.86504	4.0828	3.78335	5.33321
12918785	NA	NULL	1.64146	1.81404	2.41772	2.78239	2.71242	2.37081	2.04505	1.86557	2.47813	2.73835	2.33666	2.40495	3.33593	2.83105	2.05705	2.58977
12918787	NA	NULL	2.82617	2.48632	3.6778	2.42472	2.48322	2.70621	2.519	2.30567	2.67704	2.71476	3.00134	2.18103	2.66894	2.70101	2.99209	2.83851
12918789	NA	NULL	5.66364	6.15719	5.51604	6.19926	6.02952	5.11003	5.82555	6.10388	5.4933	5.76305	6.79702	7.07624	4.92565	5.7477	5.48261	5.22266
12918791	NA	NULL	4.79571	4.86193	3.80465	4.46726	5.37823	4.88284	4.62699	5.59643	4.75352	5.55212	5.49617	4.77649	6.3071	6.17	6.10701	5.21006
12918793	NA	NULL	4.84459	4.81113	3.75243	3.18285	4.26553	4.5215	4.55829	4.97845	3.90277	4.03005	4.50905	2.73389	4.73533	4.74242	3.097	2.13475
12918795	NA	NULL	1.90451	2.66327	2.95949	2.18847	2.62091	2.11597	1.82155	2.04884	2.38926	2.40052	2.55883	1.91133	3.78894	2.71243	2.78757	3.25855
12918797	NA	NULL	2.53298	3.33836	2.30929	3.49415	2.90786	3.23998	3.06807	2.82643	2.69096	3.52786	3.51816	2.76882	4.49224	3.97424	3.89747	3.43477
12918799	NA	NULL	1.79374	2.1652	2.13209	2.04736	2.13566	2.0048	2.29001	2.56074	1.94161	3.39823	1.86601	1.91549	2.08734	2.35369	1.98912	2.07126
12918801	NA	NULL	1.76462	1.61213	2.17532	1.85862	1.68975	1.82538	1.78323	2.06514	1.6159	1.65867	1.82872	1.95051	1.72769	2.2289	2.57647	2.55875
12918803	NA	NULL	2.08253	1.61547	1.61321	1.90941	1.8325	1.69777	2.16002	2.2376	1.8132	1.75251	1.97925	1.80653	2.31655	1.94165	1.87303	2.3122
12918805	NA	NULL	6.75369	7.14316	8.4816	7.92888	6.22935	6.29861	6.33832	6.75805	6.19757	6.59488	6.84232	7.73761	8.00667	8.024	7.56037	8.57506
12918807	NA	NULL	2.6056	2.19587	2.16315	2.02714	2.53158	2.36059	2.92491	2.2793	2.56296	3.27631	2.78026	2.31806	2.65191	2.27281	2.44947	1.65299
12918809	NA	NULL	1.89321	1.85817	1.98778	1.68298	2.01345	2.13532	2.11192	1.88807	1.90742	1.85048	1.60072	1.77751	1.85843	2.25623	1.99017	1.77571
12918811	NA	NULL	3.20809	2.99861	3.18782	3.71528	2.74881	3.68766	3.13953	3.30606	3.38912	3.34364	3.09939	3.74532	4.63328	3.91445	3.55414	4.4549
12918813	NA	NULL	5.13117	5.73136	7.35328	7.36623	4.3967	4.91964	4.9235	4.8952	4.53926	4.49977	5.57708	5.71085	7.09427	6.91298	5.9844	7.22305
12918815	NA	NULL	4.48202	5.25537	6.08942	5.72211	4.28698	4.45642	4.11698	4.57975	4.49185	4.33208	5.73179	5.55482	6.26391	6.03668	5.71599	6.17403
12918817	NA	NULL	1.79264	1.83009	2.07096	1.69449	2.73575	1.92568	2.60382	1.61006	1.63829	1.97374	1.81362	1.69255	3.12253	1.89479	1.89714	2.55678
12918819	NA	NULL	1.65864	1.7004	2.87507	3.64254	1.8019	1.64984	1.64468	2.31625	1.52852	2.34888	1.80264	2.05139	2.99211	3.19655	3.24014	3.85205
12918821	NA	NULL	3.53138	3.46607	4.04274	4.1207	3.38494	3.49421	3.5838	3.88745	3.43495	3.41062	5.73247	3.89675	4.00506	3.31482	3.89497	4.14905
12918823	NA	NULL	1.91852	1.61427	1.82896	1.65472	1.4822	1.79221	1.91731	2.18844	1.97823	1.88609	1.9252	1.67248	1.80106	2.23285	2.08001	2.12647
12918825	NA	NULL	4.61923	4.76628	5.44517	5.45962	4.538	3.30135	5.01998	4.94612	4.30917	5.118	5.10793	5.14085	6.36831	6.5998	6.52425	6.27204
12918827	NA	NULL	6.65573	6.71583	7.76978	7.38439	5.23568	5.75461	6.4943	6.41808	5.95955	6.03706	6.6701	7.31051	7.0049	6.33705	7.34152	7.01068
12918829	NA	NULL	1.736	5.15861	3.36337	2.91064	4.6224	4.94532	2.10399	2.71409	2.49955	2.32666	3.62703	3.48904	3.46384	2.1897	2.6056	5.28738
12918831	NA	NULL	3.71882	3.69994	3.5173	3.88081	3.22169	2.93617	2.61418	3.32585	3.52018	3.18347	5.40319	4.25458	3.8974	3.14143	3.43501	4.47012
12918833	NA	NULL	3.546	3.80934	4.18712	3.17549	2.37996	2.17167	3.95236	2.41923	2.66606	3.37069	2.75927	3.39796	3.47418	4.27809	3.76509	3.88486
12918835	NA	NULL	2.19804	2.22803	1.74922	1.96946	1.7433	1.5037	2.1781	2.29711	1.75009	1.57564	1.72047	1.94892	1.96999	1.97263	1.64843	1.60392
12918837	NA	NULL	4.34599	4.95236	5.92947	5.80145	3.68627	3.81435	4.38982	4.74841	3.57154	4.44498	3.86079	5.14854	5.47418	5.69043	4.98105	5.63942
12918839	NA	NULL	2.5401	2.63139	3.10623	2.61854	2.62554	2.94833	2.29726	3.20406	2.66879	3.19023	3.67798	3.49714	2.53973	2.83345	3.04351	4.82086
12918841	NA	NULL	3.38281	3.80135	3.16102	3.39256	4.39011	3.4342	3.442	4.14651	2.20426	3.29125	2.53697	2.51884	3.30274	3.05271	2.82894	3.41774
12918843	NA	NULL	2.08672	3.03551	2.3713	2.6552	2.38262	2.81182	2.92216	3.53475	2.35227	3.81094	3.2614	2.40982	2.63018	2.13465	2.38301	3.83556
12918845	NA	NULL	1.9238	2.42286	2.18504	1.92218	1.67439	2.24446	2.56965	2.19505	2.18003	2.55331	1.99225	1.96395	2.03386	1.97483	1.98899	2.01947
12918847	NA	NULL	7.11323	7.57091	8.71266	8.39405	7.2917	7.22835	6.63489	7.71086	6.77846	7.22872	8.22873	8.30092	9.22135	8.90949	8.78441	8.95495
12918849	NA	NULL	3.00319	2.51835	2.5719	3.14358	2.40863	2.11771	2.86615	3.20189	2.53856	2.70685	2.04481	3.59615	2.98462	2.3702	2.42592	2.43142
12918851	NA	NULL	1.67231	1.67096	1.60723	1.39856	1.58596	1.55285	1.65975	1.43005	1.36435	1.55813	1.89347	1.71219	1.87071	1.73061	1.69534	2.03956
12918853	NA	NULL	2.40337	3.02452	4.11942	4.41581	3.27187	2.42956	3.4919	3.62441	2.60789	3.38355	3.73527	4.1531	3.53108	3.05098	2.52932	2.35727
12918855	NA	NULL	2.46053	2.95159	3.37387	3.38933	2.68122	3.56843	3.79955	3.27065	2.94953	3.16352	2.77196	3.26651	3.13563	2.16398	2.95246	2.32557
12918857	NA	NULL	5.13481	4.43438	5.40519	5.62816	2.0474	3.15681	3.38454	3.86329	3.91471	3.83696	2.80445	5.68693	5.10792	3.50356	5.30729	5.74585
12918859	NA	NULL	5.52122	5.3976	3.72386	3.84474	5.65858	5.19648	5.74363	5.70754	6.27078	6.02397	5.29897	4.25135	4.50262	5.16921	4.04963	4.66031
12918861	NA	NULL	5.37975	6.46781	4.40608	4.66693	5.86139	5.90261	6.261	6.06517	5.61461	6.39851	3.8077	5.03115	5.16335	5.768	5.42592	6.40503
12918863	NA	NULL	1.81086	1.58622	1.53076	1.58135	1.83152	1.86111	1.65554	1.67491	1.88018	1.74305	1.70618	1.96049	2.32124	1.90256	1.71554	1.86557
12918865	NA	NULL	1.64143	2.00817	2.25291	1.7577	2.10204	2.0148	2.24895	2.2629	2.44058	2.02706	1.62203	2.45619	1.91211	1.66559	1.95373	1.96082
12918867	NA	NULL	3.17788	4.64201	2.60589	2.40197	4.45038	4.10012	4.229	4.42518	4.31795	4.80253	3.47838	2.82643	3.33296	3.88471	4.54609	4.31805
12918869	NA	NULL	2.58019	1.57256	1.95753	1.92029	1.50867	1.42325	2.20241	1.53978	1.81303	1.65535	1.27911	2.26262	1.43428	2.39275	1.82611	1.75519
12918871	NA	NULL	4.58756	5.83658	7.50975	6.1718	5.57434	5.40554	4.05789	6.16006	4.28718	5.36231	5.94375	6.2062	7.04971	7.64324	6.38885	7.10952
12918873	NA	NULL	5.34734	6.65549	5.29598	5.406	5.77177	6.00813	6.05594	5.94983	5.92163	6.77517	5.56486	5.55942	6.64706	6.53564	6.37454	6.92385
12918875	NA	NULL	3.22157	4.44788	2.4733	2.39706	3.00478	3.86108	4.18712	3.34832	4.06269	4.46136	2.75677	2.77662	2.70223	2.93704	3.29835	3.51881
12918877	NA	NULL	3.00114	3.25343	2.18345	2.13559	3.05402	2.73118	2.52705	3.09739	2.0748	2.96207	2.07769	2.39481	4.01866	3.6577	3.23868	2.9525
12918879	NA	NULL	5.31582	5.98535	6.61454	5.57411	5.18374	5.62445	5.29821	5.52269	5.64318	5.55398	5.55897	5.80076	5.34055	5.86748	5.12785	4.48025
12918881	NA	NULL	1.81429	1.88522	1.74095	1.6968	2.11996	1.88226	2.34357	1.53645	1.89213	1.96201	1.53047	1.46458	2.02181	2.38096	1.86804	2.62084
12918883	NA	NULL	4.43168	4.15991	3.88267	5.44467	4.62145	4.44921	4.59105	4.74309	5.00593	5.50154	5.23346	4.17521	5.96172	5.78602	5.23061	4.84488
12918885	NA	NULL	3.23198	4.8376	7.40337	7.4797	5.26531	4.98795	4.42034	4.49571	4.16744	5.06284	5.69909	5.97641	5.23595	5.53025	4.89661	4.52253
12918887	NA	NULL	2.3693	2.83657	2.91468	3.31817	2.0718	2.28157	2.8306	3.04588	2.65136	3.38808	2.56324	2.68743	2.28225	2.92184	3.69093	3.07717
12918889	NA	NULL	2.62235	2.63399	3.67462	3.79611	2.45207	2.61377	2.72371	2.6286	2.72295	2.32972	3.76886	3.02467	3.63126	3.33884	3.23535	3.62805
12918891	NA	NULL	2.77399	2.66102	2.70594	3.32288	2.29042	2.75863	2.40487	2.88109	2.50402	3.36902	3.94099	2.34435	3.73842	2.18442	1.95549	3.15522
12918893	NA	NULL	3.40405	3.03033	2.85153	2.55422	2.75258	2.67469	2.6142	3.31578	3.12926	3.05441	2.9667	2.75715	3.1039	2.8258	2.88057	3.26411
12918895	NA	NULL	2.65266	3.19246	3.91001	4.69606	2.71286	3.3929	3.11608	3.92489	2.72597	3.17547	3.46199	3.55698	3.74856	4.60907	4.48342	3.28276
12918897	NA	NULL	1.60955	1.56933	1.71186	1.55585	1.6675	1.66091	1.88447	1.58838	1.56117	1.7154	1.63323	1.58118	2.12656	1.71873	1.57814	2.02296
12918899	NA	NULL	1.96981	1.94887	1.98246	2.07938	2.13152	2.15304	2.23802	2.23495	1.86283	1.89229	2.10346	1.87362	1.91414	1.61515	1.78183	1.86849
12918901	NA	NULL	2.53002	2.41006	2.58537	2.29397	2.44009	2.2894	2.43019	1.74651	2.7523	2.39959	2.54602	2.24904	2.20829	2.55212	2.08396	2.12469
12918903	NA	NULL	1.75946	1.74535	1.96651	1.83918	1.92495	2.19181	2.04384	2.30518	2.0819	1.68002	1.81277	1.85137	1.6492	2.05534	2.22457	1.93435
12918905	NA	NULL	2.07388	1.98654	2.74189	2.51102	1.94802	1.90527	2.40021	2.18846	1.80326	1.97212	2.82124	2.33166	2.84492	1.66186	2.10338	2.36606
12918907	NA	NULL	6.82797	6.65446	9.18432	9.33	6.53014	6.49419	6.16655	6.82201	6.56079	6.88387	9.06765	8.35033	9.66443	9.91774	9.72602	9.78104
12918909	NA	NULL	3.44912	3.36977	6.26684	6.19259	2.65053	2.95129	4.55022	2.81492	2.97747	3.34756	3.20994	3.80321	3.4117	3.90726	3.81468	3.69534
12918911	NA	NULL	7.54687	7.66013	9.1171	9.16043	6.40816	6.30601	7.51915	7.69092	7.51242	7.66348	8.05908	8.88555	9.11076	9.27228	9.25046	9.33941
12918913	NA	NULL	4.71863	5.13028	6.4155	6.7564	4.0083	4.78308	4.76654	5.10799	4.51387	4.71384	5.65524	6.45227	7.00123	6.97577	6.69156	6.42331
12918915	NA	NULL	1.5996	1.6335	1.80812	1.55704	1.94849	1.66977	1.72324	1.88749	1.58118	1.7569	1.37437	1.68356	1.79664	1.88518	2.14162	1.57887
12918917	NA	NULL	6.89629	7.78229	7.94143	8.15781	6.47849	6.86652	6.62512	7.60233	6.59763	7.07909	6.78178	7.64009	7.72651	7.02252	7.36492	7.52306
12918919	NA	NULL	1.84397	1.76535	1.95992	1.76168	2.36877	1.76902	1.96892	1.60984	1.88951	1.78155	2.05274	1.61229	1.85215	1.64727	1.82738	1.89093
12918921	NA	NULL	1.77136	2.11451	3.7853	3.40144	2.05878	1.52762	2.29585	1.61395	2.02414	1.57172	1.57652	2.0978	3.38569	3.65081	2.04914	2.98151
12918923	NA	NULL	2.02769	2.63386	4.80799	3.20373	1.6741	2.77204	2.36244	2.21585	1.87857	2.11777	2.02764	2.78097	2.98791	2.84419	2.62978	2.61657
12918925	NA	NULL	2.01689	1.92155	1.79224	1.99569	1.73219	2.01756	2.13569	2.2332	1.86952	2.70006	2.03151	1.90025	2.06262	2.08726	2.16043	1.97629
12918927	NA	NULL	2.07249	2.51113	1.75493	2.21611	2.13313	1.87013	2.06165	2.16797	1.89002	1.90595	2.08351	2.20558	2.00736	2.24948	2.00018	2.60328
12918929	NA	NULL	4.91556	5.06041	4.65982	5.69074	4.04858	4.06424	4.55741	4.80352	4.55006	4.65306	6.70513	4.71413	3.50987	3.21919	3.23198	2.28113
12918931	NA	NULL	3.23382	3.29882	3.09083	3.54486	3.04218	3.11627	2.54689	2.97748	3.23717	2.93269	3.22033	3.19214	4.34968	4.58047	4.09176	3.63214
12918933	NA	NULL	7.97684	7.63226	8.63133	9.17991	7.18324	6.84699	7.3014	8.13967	7.41971	7.31887	9.27543	8.09127	5.69005	5.38315	5.99022	6.02598
12918935	NA	NULL	7.57944	7.99151	8.1015	8.4006	6.91103	7.07408	7.24805	8.21951	7.48318	7.40915	8.83686	7.51967	5.68621	4.76634	5.32614	5.05261
12918937	NA	NULL	6.74818	5.82387	6.94543	8.18701	5.46816	5.66192	6.21318	5.94344	6.29484	5.7715	9.32101	7.01817	4.23547	3.9454	4.05951	3.65066
12918939	NA	NULL	3.96044	3.36666	4.16791	4.23638	3.09227	4.36886	2.79701	3.79857	2.93851	4.22657	3.22019	3.60168	2.59198	4.42846	4.22364	3.80581
12918941	NA	NULL	7.80132	7.52613	8.88168	9.41619	6.77669	6.90909	7.45043	8.08939	7.40605	6.76956	9.83061	7.61502	4.7793	5.19606	5.2661	4.80015
12918943	NA	NULL	3.31769	4.53883	3.49081	4.94473	3.33585	2.69696	3.67489	4.9916	3.36352	4.83886	4.80011	2.85924	2.14127	3.13922	2.47675	2.98003
12918945	NA	NULL	4.96853	6.17599	5.23649	4.49796	4.39758	4.13295	5.38729	5.9049	4.63257	5.39082	5.02661	3.96105	3.34907	2.50097	3.36914	2.97877
12918947	NA	NULL	5.14772	5.09041	5.40577	5.50989	5.36953	5.05603	5.01949	4.92374	5.1306	5.01818	6.29195	5.6971	5.12564	5.48744	5.22274	5.93839
12918949	NA	NULL	4.23597	4.63766	4.2407	5.07813	3.88758	3.46904	4.37745	4.67459	4.23163	3.83101	5.74867	4.32852	2.89056	3.88535	3.46947	3.4155
12918951	NA	NULL	3.84688	4.78531	5.15922	5.9215	3.44561	3.37064	2.78232	3.98104	4.04379	4.1511	3.75173	5.32258	4.09181	3.98851	3.51926	3.87388
12918953	NA	NULL	3.28216	4.63413	6.53782	5.59551	2.98245	2.49201	5.22757	3.25946	2.80536	4.67516	2.78026	5.06051	6.27613	2.21764	4.78089	2.92903
12918955	NA	NULL	4.41166	4.57583	5.71384	5.38469	3.96624	3.92456	2.92491	4.63058	4.75616	4.60347	5.68752	5.74652	3.54844	3.84136	4.71097	4.0304
12918957	NA	NULL	2.63909	2.7127	3.01405	4.33092	2.48808	2.23171	2.7363	2.7887	3.19323	2.42608	3.25422	2.65665	2.57248	2.19596	2.47534	2.57098
12918959	NA	NULL	2.69188	4.40777	3.32467	2.72659	2.15968	2.80763	3.49406	4.5106	3.04361	3.86204	2.53285	3.45296	2.50795	3.09337	2.47728	2.52128
12918961	NA	NULL	5.94875	6.26046	4.0953	4.81208	6.06459	6.55299	6.84931	6.89092	8.44979	7.56284	5.07974	6.16019	5.64155	5.77886	6.4127	6.16236
12918963	NA	NULL	6.36587	7.00522	5.35564	5.34245	6.54483	6.83219	6.90543	7.36752	8.86249	8.49731	6.91739	7.29102	6.55113	6.38269	6.49976	6.16702
12918965	NA	NULL	6.5531	7.10293	3.30902	4.22193	6.72217	7.25002	7.77479	7.5607	9.10755	8.80041	5.34569	7.06118	5.28254	6.15322	5.63914	6.07866
12918967	NA	NULL	5.85791	6.24432	4.42857	4.44593	5.89388	5.75941	7.19067	6.66058	8.31654	7.87292	4.1639	7.05428	5.62301	3.56129	5.95279	5.30259
12918969	NA	NULL	3.45	3.15421	3.45385	3.8378	4.02641	4.6042	4.72096	3.9198	6.93498	5.64242	3.70708	3.75298	3.82024	3.75689	3.97161	4.52698
12918971	NA	NULL	5.73285	5.88314	4.33434	4.79926	6.55012	6.65819	6.59928	6.16356	8.13491	7.31111	4.42089	5.77795	5.75163	4.80583	5.87367	5.07313
12918973	NA	NULL	5.80384	6.06924	3.61213	2.649	5.43833	5.86764	6.63276	6.72304	5.91684	6.3882	2.78836	5.42457	5.85358	5.16774	5.4287	5.18901
12918975	NA	NULL	5.55487	5.53197	4.80365	4.85024	4.63932	4.91938	6.86294	5.65128	5.32087	5.88404	4.61137	5.49893	5.66241	4.87813	5.70105	5.52798
12918977	NA	NULL	6.49412	6.95885	5.71385	5.38467	6.57991	6.87769	7.5576	7.44594	6.74783	7.33042	5.30526	6.6143	6.60613	5.86783	6.42071	6.93271
12918979	NA	NULL	4.51023	2.87132	2.9555	3.85625	4.3708	5.00874	4.80414	3.77345	2.79167	3.19708	3.96687	3.79203	3.67882	4.20303	3.36563	2.15875
12918981	NA	NULL	5.40243	5.66822	6.48613	6.28077	5.60686	4.80707	6.03474	5.94084	5.41285	6.10386	6.35688	6.00803	5.50628	5.32138	5.34107	5.38779
12918983	NA	NULL	4.4952	4.6575	4.36013	5.01593	4.51629	4.59391	5.22431	5.42856	4.55339	5.20774	5.05217	5.07557	4.62719	4.73038	4.88141	4.43957
12918985	NA	NULL	3.75861	3.85585	3.62659	4.34964	3.81858	4.40252	4.13665	4.63789	4.58655	4.29668	4.69462	4.06195	5.01785	4.68283	3.97892	5.21405
12918987	NA	NULL	4.59908	3.80896	2.19789	2.00886	3.7148	3.82936	4.55456	2.99588	4.62049	3.8824	2.39258	3.69052	4.5897	3.17431	4.03817	4.9457
12918989	NA	NULL	3.06755	3.16274	1.89317	1.81174	2.82705	2.1698	5.42236	2.93699	4.0327	2.46502	1.57748	1.75058	2.40091	1.96962	2.25697	2.04651
12918991	NA	NULL	5.28717	4.27535	3.67652	2.76992	5.19792	5.3065	6.30363	5.10068	6.03588	5.03391	3.80737	3.26699	3.53475	4.13854	3.89673	4.10946
12918993	NA	NULL	5.34973	4.95889	4.9319	4.00118	5.00259	4.86896	5.25786	5.0633	5.81878	5.62093	4.60002	4.81624	5.3109	4.90129	4.64617	5.42374
12918995	NA	NULL	5.78071	5.49237	4.90494	5.32215	5.70179	5.63733	6.72994	5.67065	5.86453	5.61462	5.24493	5.10365	3.74731	4.71462	4.94432	4.9989
12918997	NA	NULL	6.62005	6.55746	5.88023	6.50178	6.84534	6.75436	8.02351	6.19287	6.62861	6.88153	5.92595	6.25405	4.33055	5.23549	4.64721	5.50955
12918999	NA	NULL	5.94481	6.36043	5.06959	5.52002	5.77047	6.64862	7.40739	6.32319	6.80256	6.41225	3.11716	5.93082	6.03959	6.54012	5.72477	6.73
12919001	NA	NULL	4.86054	4.81386	1.82512	2.88954	4.72238	4.85294	6.53302	5.41893	4.46188	5.18666	2.14651	4.3585	4.50905	4.25338	4.28562	4.95772
12919003	NA	NULL	5.6978	6.13301	6.22729	5.67735	6.2689	5.57861	6.41809	6.10901	5.97498	6.15844	5.84681	5.32102	6.19819	6.24464	5.93299	5.42946
12919005	NA	NULL	5.29926	5.83879	4.73589	5.01912	5.15117	5.2121	6.16314	5.99093	5.36463	5.63415	4.5392	5.16682	5.52558	4.66829	5.26468	5.52137
12919007	NA	NULL	3.18259	3.35803	4.37852	5.208	2.90212	2.64034	3.37831	2.99379	2.84286	3.70853	3.55467	4.26813	3.6684	3.74034	4.21813	3.90112
12919009	NA	NULL	4.27094	4.98183	5.31011	5.37148	4.99689	4.69362	4.80349	4.5365	3.40923	5.00877	5.70991	5.16441	6.11329	5.53596	5.84636	5.33109
12919011	NA	NULL	3.71999	4.99173	3.57853	3.81066	5.16142	4.21346	4.26535	3.69984	3.65299	3.61923	3.25792	4.394	3.38684	3.37164	3.52479	3.40082
12919013	NA	NULL	3.1978	3.69024	4.27202	5.06688	3.09816	3.72153	3.38454	3.39715	2.93102	2.78309	2.96835	4.30637	4.06389	3.82709	3.96231	5.28601
12919015	NA	NULL	1.99962	2.9886	2.42848	3.53974	2.77088	2.89074	2.42424	2.61611	2.76098	2.88981	2.70083	2.91951	2.61709	2.59133	3.21951	2.99768
12919017	NA	NULL	1.88078	2.61735	1.62086	2.33014	1.68918	2.66336	2.40931	2.59645	2.11297	3.03771	2.00553	1.93191	1.8317	2.57116	1.50118	1.57887
12919019	NA	NULL	1.48378	1.96365	1.62188	1.55612	1.86388	1.91846	1.69594	1.77998	1.46398	1.8227	1.63968	1.61869	1.60177	1.70457	1.94946	2.03504
12919021	NA	NULL	5.28844	4.66677	6.12882	6.73803	4.23146	4.51025	4.42262	5.20849	5.34479	4.57162	6.71711	6.00637	4.41415	3.51408	4.4577	3.67509
12919023	NA	NULL	3.44195	3.44674	2.97494	3.88208	2.99741	3.70466	3.99171	3.14474	3.23935	3.4574	3.56652	3.52991	4.91386	4.5178	4.72001	5.61282
12919025	NA	NULL	3.43599	3.21256	3.30012	3.56214	3.2487	3.55901	4.54985	3.0754	3.50203	5.2599	2.90288	3.66925	3.93092	2.88366	3.3117	3.32895
12919027	NA	NULL	4.47324	4.84459	6.01381	5.74196	4.69385	4.6577	4.8344	4.69113	4.54253	4.87765	5.12117	5.48231	6.07636	5.61241	5.48449	5.79376
12919029	NA	NULL	1.80406	1.84473	1.67664	1.7551	1.77017	1.7028	1.76935	2.02918	1.68578	1.82585	1.8655	1.64362	1.85342	1.66933	1.89777	1.89712
12919031	NA	NULL	1.80359	1.74079	1.62101	1.91999	1.74031	2.01638	1.70509	1.62531	1.57096	1.93933	1.40806	1.72275	2.19525	1.83455	1.6032	1.89395
12919033	NA	NULL	1.78142	1.56757	2.11793	1.99805	1.72906	1.98927	2.1954	1.72777	1.73736	2.006	1.50213	1.89646	2.16202	1.78283	2.0365	2.19221
12919035	NA	NULL	1.9468	1.95208	1.87007	2.13218	1.98323	1.8797	2.02702	1.81136	1.80949	1.9955	1.9287	2.02301	2.35749	2.47961	2.62387	2.14895
12919037	NA	NULL	2.88839	3.05911	5.30211	4.59299	3.06779	3.24222	2.89663	2.73348	3.44578	2.83139	4.20415	3.69824	4.80271	4.6983	6.17431	5.14216
12919039	NA	NULL	2.11126	2.38172	4.22693	4.22956	2.66702	2.63049	3.46207	2.91392	2.76347	2.64551	3.68556	3.46256	3.82222	4.92743	4.75725	3.4738
12919041	NA	NULL	3.67604	3.87574	3.55518	4.11513	3.74638	4.55334	4.05107	4.20689	4.27994	4.53078	4.4516	3.50781	4.89849	4.89984	4.92315	3.97401
12919043	NA	NULL	4.4604	4.72173	5.56546	6.13769	4.82635	5.26173	5.29611	5.18433	5.36473	5.63006	5.28457	5.89723	5.70715	5.83746	6.09297	5.88058
12919045	NA	NULL	4.4967	5.12177	5.066	4.44748	4.15069	5.01361	5.33873	5.13186	3.83636	5.2268	4.05545	5.22397	6.03617	5.79546	6.15287	6.63984
12919047	NA	NULL	4.24497	3.87836	6.12836	6.54545	4.06912	3.69046	3.5956	4.66844	4.78513	3.42701	6.01593	5.39463	3.86504	4.0828	3.78335	5.33321
12919049	NA	NULL	1.64146	1.81404	2.41772	2.78239	2.71242	2.37081	2.04505	1.86557	2.47813	2.73835	2.33666	2.40495	3.33593	2.83105	2.05705	2.58977
12919051	NA	NULL	2.82617	2.48632	3.6778	2.42472	2.48322	2.70621	2.519	2.30567	2.67704	2.71476	3.00134	2.18103	2.66894	2.70101	2.99209	2.83851
12919053	NA	NULL	5.66364	6.15719	5.51604	6.19926	6.02952	5.11003	5.82555	6.10388	5.4933	5.76305	6.79702	7.07624	4.92565	5.7477	5.48261	5.22266
12919055	NA	NULL	4.79571	4.86193	3.80465	4.46726	5.37823	4.88284	4.62699	5.59643	4.75352	5.55212	5.49617	4.77649	6.3071	6.17	6.10701	5.21006
12919057	NA	NULL	4.84459	4.81113	3.75243	3.18285	4.26553	4.5215	4.55829	4.97845	3.90277	4.03005	4.50905	2.73389	4.73533	4.74242	3.097	2.13475
12919059	NA	NULL	1.90451	2.66327	2.95949	2.18847	2.62091	2.11597	1.82155	2.04884	2.38926	2.40052	2.55883	1.91133	3.78894	2.71243	2.78757	3.25855
12919061	NA	NULL	2.53298	3.33836	2.30929	3.49415	2.90786	3.23998	3.06807	2.82643	2.69096	3.52786	3.51816	2.76882	4.49224	3.97424	3.89747	3.43477
12919063	NA	NULL	1.79374	2.1652	2.13209	2.04736	2.13566	2.0048	2.29001	2.56074	1.94161	3.39823	1.86601	1.91549	2.08734	2.35369	1.98912	2.07126
12919065	NA	NULL	1.76462	1.61213	2.17532	1.85862	1.68975	1.82538	1.78323	2.06514	1.6159	1.65867	1.82872	1.95051	1.72769	2.2289	2.57647	2.55875
12919067	NA	NULL	2.08253	1.61547	1.61321	1.90941	1.8325	1.69777	2.16002	2.2376	1.8132	1.75251	1.97925	1.80653	2.31655	1.94165	1.87303	2.3122
12919069	NA	NULL	6.75369	7.14316	8.4816	7.92888	6.22935	6.29861	6.33832	6.75805	6.19757	6.59488	6.84232	7.73761	8.00667	8.024	7.56037	8.57506
12919071	NA	NULL	2.6056	2.19587	2.16315	2.02714	2.53158	2.36059	2.92491	2.2793	2.56296	3.27631	2.78026	2.31806	2.65191	2.27281	2.44947	1.65299
12919073	NA	NULL	1.89321	1.85817	1.98778	1.68298	2.01345	2.13532	2.11192	1.88807	1.90742	1.85048	1.60072	1.77751	1.85843	2.25623	1.99017	1.77571
12919075	NA	NULL	3.20809	2.99861	3.18782	3.71528	2.74881	3.68766	3.13953	3.30606	3.38912	3.34364	3.09939	3.74532	4.63328	3.91445	3.55414	4.4549
12919077	NA	NULL	5.13117	5.73136	7.35328	7.36623	4.3967	4.91964	4.9235	4.8952	4.53926	4.49977	5.57708	5.71085	7.09427	6.91298	5.9844	7.22305
12919079	NA	NULL	4.48202	5.25537	6.08942	5.72211	4.28698	4.45642	4.11698	4.57975	4.49185	4.33208	5.73179	5.55482	6.26391	6.03668	5.71599	6.17403
12919081	NA	NULL	1.79264	1.83009	2.07096	1.69449	2.73575	1.92568	2.60382	1.61006	1.63829	1.97374	1.81362	1.69255	3.12253	1.89479	1.89714	2.55678
12919083	NA	NULL	1.65864	1.7004	2.87507	3.64254	1.8019	1.64984	1.64468	2.31625	1.52852	2.34888	1.80264	2.05139	2.99211	3.19655	3.24014	3.85205
12919085	NA	NULL	3.53138	3.46607	4.04274	4.1207	3.38494	3.49421	3.5838	3.88745	3.43495	3.41062	5.73247	3.89675	4.00506	3.31482	3.89497	4.14905
12919087	NA	NULL	1.91852	1.61427	1.82896	1.65472	1.4822	1.79221	1.91731	2.18844	1.97823	1.88609	1.9252	1.67248	1.80106	2.23285	2.08001	2.12647
12919089	NA	NULL	4.61923	4.76628	5.44517	5.45962	4.538	3.30135	5.01998	4.94612	4.30917	5.118	5.10793	5.14085	6.36831	6.5998	6.52425	6.27204
12919091	NA	NULL	6.65573	6.71583	7.76978	7.38439	5.23568	5.75461	6.4943	6.41808	5.95955	6.03706	6.6701	7.31051	7.0049	6.33705	7.34152	7.01068
12919093	NA	NULL	1.736	5.15861	3.36337	2.91064	4.6224	4.94532	2.10399	2.71409	2.49955	2.32666	3.62703	3.48904	3.46384	2.1897	2.6056	5.28738
12919095	NA	NULL	3.71882	3.69994	3.5173	3.88081	3.22169	2.93617	2.61418	3.32585	3.52018	3.18347	5.40319	4.25458	3.8974	3.14143	3.43501	4.47012
12919097	NA	NULL	3.546	3.80934	4.18712	3.17549	2.37996	2.17167	3.95236	2.41923	2.66606	3.37069	2.75927	3.39796	3.47418	4.27809	3.76509	3.88486
12919099	NA	NULL	2.19804	2.22803	1.74922	1.96946	1.7433	1.5037	2.1781	2.29711	1.75009	1.57564	1.72047	1.94892	1.96999	1.97263	1.64843	1.60392
12919101	NA	NULL	4.34599	4.95236	5.92947	5.80145	3.68627	3.81435	4.38982	4.74841	3.57154	4.44498	3.86079	5.14854	5.47418	5.69043	4.98105	5.63942
12919103	NA	NULL	2.5401	2.63139	3.10623	2.61854	2.62554	2.94833	2.29726	3.20406	2.66879	3.19023	3.67798	3.49714	2.53973	2.83345	3.04351	4.82086
12919105	NA	NULL	3.38281	3.80135	3.16102	3.39256	4.39011	3.4342	3.442	4.14651	2.20426	3.29125	2.53697	2.51884	3.30274	3.05271	2.82894	3.41774
12919107	NA	NULL	2.08672	3.03551	2.3713	2.6552	2.38262	2.81182	2.92216	3.53475	2.35227	3.81094	3.2614	2.40982	2.63018	2.13465	2.38301	3.83556
12919109	NA	NULL	1.9238	2.42286	2.18504	1.92218	1.67439	2.24446	2.56965	2.19505	2.18003	2.55331	1.99225	1.96395	2.03386	1.97483	1.98899	2.01947
12919111	NA	NULL	7.11323	7.57091	8.71266	8.39405	7.2917	7.22835	6.63489	7.71086	6.77846	7.22872	8.22873	8.30092	9.22135	8.90949	8.78441	8.95495
12919113	NA	NULL	3.00319	2.51835	2.5719	3.14358	2.40863	2.11771	2.86615	3.20189	2.53856	2.70685	2.04481	3.59615	2.98462	2.3702	2.42592	2.43142
12919115	NA	NULL	1.67231	1.67096	1.60723	1.39856	1.58596	1.55285	1.65975	1.43005	1.36435	1.55813	1.89347	1.71219	1.87071	1.73061	1.69534	2.03956
12919117	NA	NULL	2.40337	3.02452	4.11942	4.41581	3.27187	2.42956	3.4919	3.62441	2.60789	3.38355	3.73527	4.1531	3.53108	3.05098	2.52932	2.35727
12919119	NA	NULL	2.46053	2.95159	3.37387	3.38933	2.68122	3.56843	3.79955	3.27065	2.94953	3.16352	2.77196	3.26651	3.13563	2.16398	2.95246	2.32557
12919121	NA	NULL	5.13481	4.43438	5.40519	5.62816	2.0474	3.15681	3.38454	3.86329	3.91471	3.83696	2.80445	5.68693	5.10792	3.50356	5.30729	5.74585
12919123	NA	NULL	5.52122	5.3976	3.72386	3.84474	5.65858	5.19648	5.74363	5.70754	6.27078	6.02397	5.29897	4.25135	4.50262	5.16921	4.04963	4.66031
12919125	NA	NULL	5.37975	6.46781	4.40608	4.66693	5.86139	5.90261	6.261	6.06517	5.61461	6.39851	3.8077	5.03115	5.16335	5.768	5.42592	6.40503
12919127	NA	NULL	1.81086	1.58622	1.53076	1.58135	1.83152	1.86111	1.65554	1.67491	1.88018	1.74305	1.70618	1.96049	2.32124	1.90256	1.71554	1.86557
12919129	NA	NULL	1.64143	2.00817	2.25291	1.7577	2.10204	2.0148	2.24895	2.2629	2.44058	2.02706	1.62203	2.45619	1.91211	1.66559	1.95373	1.96082
12919131	NA	NULL	3.17788	4.64201	2.60589	2.40197	4.45038	4.10012	4.229	4.42518	4.31795	4.80253	3.47838	2.82643	3.33296	3.88471	4.54609	4.31805
12919133	NA	NULL	2.58019	1.57256	1.95753	1.92029	1.50867	1.42325	2.20241	1.53978	1.81303	1.65535	1.27911	2.26262	1.43428	2.39275	1.82611	1.75519
12919135	NA	NULL	4.58756	5.83658	7.50975	6.1718	5.57434	5.40554	4.05789	6.16006	4.28718	5.36231	5.94375	6.2062	7.04971	7.64324	6.38885	7.10952
12919137	NA	NULL	5.34734	6.65549	5.29598	5.406	5.77177	6.00813	6.05594	5.94983	5.92163	6.77517	5.56486	5.55942	6.64706	6.53564	6.37454	6.92385
12919139	NA	NULL	3.22157	4.44788	2.4733	2.39706	3.00478	3.86108	4.18712	3.34832	4.06269	4.46136	2.75677	2.77662	2.70223	2.93704	3.29835	3.51881
12919141	NA	NULL	3.00114	3.25343	2.18345	2.13559	3.05402	2.73118	2.52705	3.09739	2.0748	2.96207	2.07769	2.39481	4.01866	3.6577	3.23868	2.9525
12919143	NA	NULL	5.31582	5.98535	6.61454	5.57411	5.18374	5.62445	5.29821	5.52269	5.64318	5.55398	5.55897	5.80076	5.34055	5.86748	5.12785	4.48025
12919145	NA	NULL	1.81429	1.88522	1.74095	1.6968	2.11996	1.88226	2.34357	1.53645	1.89213	1.96201	1.53047	1.46458	2.02181	2.38096	1.86804	2.62084
12919147	NA	NULL	4.43168	4.15991	3.88267	5.44467	4.62145	4.44921	4.59105	4.74309	5.00593	5.50154	5.23346	4.17521	5.96172	5.78602	5.23061	4.84488
12919149	NA	NULL	3.23198	4.8376	7.40337	7.4797	5.26531	4.98795	4.42034	4.49571	4.16744	5.06284	5.69909	5.97641	5.23595	5.53025	4.89661	4.52253
12919151	NA	NULL	2.3693	2.83657	2.91468	3.31817	2.0718	2.28157	2.8306	3.04588	2.65136	3.38808	2.56324	2.68743	2.28225	2.92184	3.69093	3.07717
12919153	NA	NULL	2.62235	2.63399	3.67462	3.79611	2.45207	2.61377	2.72371	2.6286	2.72295	2.32972	3.76886	3.02467	3.63126	3.33884	3.23535	3.62805
12919155	NA	NULL	2.77399	2.66102	2.70594	3.32288	2.29042	2.75863	2.40487	2.88109	2.50402	3.36902	3.94099	2.34435	3.73842	2.18442	1.95549	3.15522
12919157	NA	NULL	3.40405	3.03033	2.85153	2.55422	2.75258	2.67469	2.6142	3.31578	3.12926	3.05441	2.9667	2.75715	3.1039	2.8258	2.88057	3.26411
12919159	NA	NULL	2.65266	3.19246	3.91001	4.69606	2.71286	3.3929	3.11608	3.92489	2.72597	3.17547	3.46199	3.55698	3.74856	4.60907	4.48342	3.28276
12919161	NA	NULL	1.60955	1.56933	1.71186	1.55585	1.6675	1.66091	1.88447	1.58838	1.56117	1.7154	1.63323	1.58118	2.12656	1.71873	1.57814	2.02296
12919163	NA	NULL	1.96981	1.94887	1.98246	2.07938	2.13152	2.15304	2.23802	2.23495	1.86283	1.89229	2.10346	1.87362	1.91414	1.61515	1.78183	1.86849
12919165	NA	NULL	2.53002	2.41006	2.58537	2.29397	2.44009	2.2894	2.43019	1.74651	2.7523	2.39959	2.54602	2.24904	2.20829	2.55212	2.08396	2.12469
12919167	NA	NULL	1.75946	1.74535	1.96651	1.83918	1.92495	2.19181	2.04384	2.30518	2.0819	1.68002	1.81277	1.85137	1.6492	2.05534	2.22457	1.93435
12919169	NA	NULL	2.07388	1.98654	2.74189	2.51102	1.94802	1.90527	2.40021	2.18846	1.80326	1.97212	2.82124	2.33166	2.84492	1.66186	2.10338	2.36606
12919171	NA	NULL	6.82797	6.65446	9.18432	9.33	6.53014	6.49419	6.16655	6.82201	6.56079	6.88387	9.06765	8.35033	9.66443	9.91774	9.72602	9.78104
12919173	NA	NULL	3.44912	3.36977	6.26684	6.19259	2.65053	2.95129	4.55022	2.81492	2.97747	3.34756	3.20994	3.80321	3.4117	3.90726	3.81468	3.69534
12919175	NA	NULL	7.54687	7.66013	9.1171	9.16043	6.40816	6.30601	7.51915	7.69092	7.51242	7.66348	8.05908	8.88555	9.11076	9.27228	9.25046	9.33941
12919177	NA	NULL	4.71863	5.13028	6.4155	6.7564	4.0083	4.78308	4.76654	5.10799	4.51387	4.71384	5.65524	6.45227	7.00123	6.97577	6.69156	6.42331
12919179	NA	NULL	1.5996	1.6335	1.80812	1.55704	1.94849	1.66977	1.72324	1.88749	1.58118	1.7569	1.37437	1.68356	1.79664	1.88518	2.14162	1.57887
12919181	NA	NULL	6.89629	7.78229	7.94143	8.15781	6.47849	6.86652	6.62512	7.60233	6.59763	7.07909	6.78178	7.64009	7.72651	7.02252	7.36492	7.52306
12919183	NA	NULL	1.84397	1.76535	1.95992	1.76168	2.36877	1.76902	1.96892	1.60984	1.88951	1.78155	2.05274	1.61229	1.85215	1.64727	1.82738	1.89093
12919185	NA	NULL	1.77136	2.11451	3.7853	3.40144	2.05878	1.52762	2.29585	1.61395	2.02414	1.57172	1.57652	2.0978	3.38569	3.65081	2.04914	2.98151
12919187	NA	NULL	2.02769	2.63386	4.80799	3.20373	1.6741	2.77204	2.36244	2.21585	1.87857	2.11777	2.02764	2.78097	2.98791	2.84419	2.62978	2.61657
12919189	NA	NULL	2.01689	1.92155	1.79224	1.99569	1.73219	2.01756	2.13569	2.2332	1.86952	2.70006	2.03151	1.90025	2.06262	2.08726	2.16043	1.97629
12919191	NA	NULL	2.07249	2.51113	1.75493	2.21611	2.13313	1.87013	2.06165	2.16797	1.89002	1.90595	2.08351	2.20558	2.00736	2.24948	2.00018	2.60328
12919193	NA	NULL	4.91556	5.06041	4.65982	5.69074	4.04858	4.06424	4.55741	4.80352	4.55006	4.65306	6.70513	4.71413	3.50987	3.21919	3.23198	2.28113
12919195	NA	NULL	3.23382	3.29882	3.09083	3.54486	3.04218	3.11627	2.54689	2.97748	3.23717	2.93269	3.22033	3.19214	4.34968	4.58047	4.09176	3.63214
12919197	NA	NULL	7.97684	7.63226	8.63133	9.17991	7.18324	6.84699	7.3014	8.13967	7.41971	7.31887	9.27543	8.09127	5.69005	5.38315	5.99022	6.02598
12919199	NA	NULL	7.57944	7.99151	8.1015	8.4006	6.91103	7.07408	7.24805	8.21951	7.48318	7.40915	8.83686	7.51967	5.68621	4.76634	5.32614	5.05261
12919201	NA	NULL	6.74818	5.82387	6.94543	8.18701	5.46816	5.66192	6.21318	5.94344	6.29484	5.7715	9.32101	7.01817	4.23547	3.9454	4.05951	3.65066
12919203	NA	NULL	3.96044	3.36666	4.16791	4.23638	3.09227	4.36886	2.79701	3.79857	2.93851	4.22657	3.22019	3.60168	2.59198	4.42846	4.22364	3.80581
12919205	NA	NULL	7.80132	7.52613	8.88168	9.41619	6.77669	6.90909	7.45043	8.08939	7.40605	6.76956	9.83061	7.61502	4.7793	5.19606	5.2661	4.80015
12919207	NA	NULL	3.31769	4.53883	3.49081	4.94473	3.33585	2.69696	3.67489	4.9916	3.36352	4.83886	4.80011	2.85924	2.14127	3.13922	2.47675	2.98003
12919209	NA	NULL	4.96853	6.17599	5.23649	4.49796	4.39758	4.13295	5.38729	5.9049	4.63257	5.39082	5.02661	3.96105	3.34907	2.50097	3.36914	2.97877
12919211	NA	NULL	5.14772	5.09041	5.40577	5.50989	5.36953	5.05603	5.01949	4.92374	5.1306	5.01818	6.29195	5.6971	5.12564	5.48744	5.22274	5.93839
12919213	NA	NULL	4.23597	4.63766	4.2407	5.07813	3.88758	3.46904	4.37745	4.67459	4.23163	3.83101	5.74867	4.32852	2.89056	3.88535	3.46947	3.4155
12919215	NA	NULL	3.84688	4.78531	5.15922	5.9215	3.44561	3.37064	2.78232	3.98104	4.04379	4.1511	3.75173	5.32258	4.09181	3.98851	3.51926	3.87388
12919217	NA	NULL	3.28216	4.63413	6.53782	5.59551	2.98245	2.49201	5.22757	3.25946	2.80536	4.67516	2.78026	5.06051	6.27613	2.21764	4.78089	2.92903
12919219	NA	NULL	4.41166	4.57583	5.71384	5.38469	3.96624	3.92456	2.92491	4.63058	4.75616	4.60347	5.68752	5.74652	3.54844	3.84136	4.71097	4.0304
12919221	NA	NULL	2.63909	2.7127	3.01405	4.33092	2.48808	2.23171	2.7363	2.7887	3.19323	2.42608	3.25422	2.65665	2.57248	2.19596	2.47534	2.57098
12919223	NA	NULL	2.69188	4.40777	3.32467	2.72659	2.15968	2.80763	3.49406	4.5106	3.04361	3.86204	2.53285	3.45296	2.50795	3.09337	2.47728	2.52128
12919225	NA	NULL	1.79727	2.36344	3.2468	2.3768	2.67166	2.61021	2.476	2.21785	2.0633	1.98739	3.95887	2.33778	1.71362	1.91776	2.10574	2.35339
12919227	NA	NULL	3.06118	3.36419	4.25816	3.62652	2.3406	3.35303	3.83078	3.50097	2.73664	3.44997	3.52948	3.95283	2.77844	3.30435	3.18565	3.50408
12919229	NA	NULL	2.80318	3.06086	4.21791	4.17811	3.36127	3.92062	3.58463	2.98002	2.84135	3.56906	3.83875	3.47097	3.87162	3.72566	4.28894	4.59207
12919231	NA	NULL	4.63174	5.02847	4.40333	4.53459	5.75488	6.00781	5.95108	5.71994	5.1826	4.98096	4.67267	3.92256	3.92287	4.63932	5.01186	3.97207
12919233	NA	NULL	2.13462	2.69253	2.16494	1.52411	1.87443	3.25864	2.68408	3.25391	1.9905	2.4658	1.55655	1.85729	3.02383	2.92041	3.0981	3.49599
12919235	NA	NULL	2.357	3.00574	2.27827	2.08461	2.31487	1.61358	2.14471	1.89305	1.97153	2.88819	2.49591	1.91212	2.6742	2.20688	1.93201	2.23912
12919237	NA	NULL	5.42729	5.73078	3.57	3.98352	4.97908	3.87284	5.07093	5.56194	5.06207	5.56191	3.92704	5.00309	5.4071	5.25308	4.4281	3.94381
12919239	NA	NULL	3.21692	4.06176	3.45196	3.09229	3.27157	3.87479	3.43522	4.30717	3.30692	3.8108	3.11585	3.28872	3.6333	3.83775	3.71135	3.16866
12919241	NA	NULL	4.14944	4.34986	4.27849	3.55381	3.68992	3.69717	3.43769	3.87955	4.82102	4.40269	3.41935	3.68035	3.56113	4.51879	3.55927	4.3466
12919243	NA	NULL	2.93775	3.47616	1.99766	2.17408	3.52151	3.48672	2.99599	3.19794	2.32917	2.76941	2.29433	2.4661	2.62984	2.85855	1.81889	2.80961
12919245	NA	NULL	3.30684	3.80944	2.82227	1.95848	3.77776	3.92289	3.01269	4.43883	3.31118	4.68405	2.78941	2.7565	3.64216	3.51251	3.30298	4.21249
12919247	NA	NULL	3.72144	3.49688	4.29876	4.58912	3.5948	3.53166	3.96815	4.86709	4.20305	3.8675	4.13803	4.66965	5.34675	4.94738	4.48492	4.65558
12919249	NA	NULL	3.43819	4.06603	4.9025	3.93139	3.86094	3.25321	3.69515	3.9629	4.11904	3.98915	3.92862	4.20057	3.89016	3.5812	3.42928	4.71577
12919251	NA	NULL	3.43794	4.22227	5.02801	4.48808	3.9264	4.92414	3.976	5.20431	4.39814	5.13049	4.44256	5.04097	5.54322	5.72999	5.06913	5.04097
12919253	NA	NULL	3.011	2.52682	3.27092	2.68713	2.92102	1.67825	3.18143	2.21764	2.57975	2.89294	2.32021	2.28192	3.52925	2.35608	2.74582	3.15744
12919255	NA	NULL	4.25533	5.33299	6.4621	6.6209	4.44852	4.44724	4.84042	4.20452	4.81668	4.75002	5.20513	6.07783	6.86312	6.7691	6.45769	6.25464
12919257	NA	NULL	1.7568	1.75611	1.51757	1.8171	1.56613	1.76118	1.50899	1.65293	1.74286	1.59133	2.02999	1.53628	2.02911	1.97766	1.95013	1.65299
12919259	NA	NULL	1.68506	2.17118	2.3316	2.08859	1.89	1.78791	2.16494	2.35413	2.11286	1.7064	2.3154	2.07406	3.46384	2.41763	2.05303	2.10764
12919261	NA	NULL	1.95913	3.25085	3.18586	4.03188	1.74456	2.27959	3.19567	3.2246	2.22537	3.79835	1.86148	3.14747	3.87737	2.61832	4.14808	4.03069
12919263	NA	NULL	2.42349	3.55223	3.5043	2.03187	3.44206	3.14078	2.85789	3.65555	2.13095	3.03686	2.25295	2.24851	3.00682	3.3743	2.73248	2.95581
12919265	NA	NULL	1.64148	1.80025	1.80762	2.12535	1.7918	1.57952	1.69022	2.147	1.52799	1.53873	2.4698	1.79754	1.72892	1.82912	1.65352	1.88116
12919267	NA	NULL	1.55185	1.81846	1.56385	1.46861	1.48268	1.49031	2.72234	2.1142	1.49006	1.39126	1.61882	1.46642	1.65064	1.62787	1.38708	1.83235
12919269	NA	NULL	1.90895	1.75743	2.44646	2.63411	3.08833	2.41978	1.97752	2.05551	1.76698	2.26998	2.09564	2.8108	3.20703	2.73918	2.54265	2.68062
12919271	NA	NULL	3.26576	3.30896	3.44321	4.24146	3.2413	3.34678	4.27534	3.6841	2.96691	3.28782	5.24887	3.85861	3.12829	3.03818	3.02795	2.98431
12919273	NA	NULL	5.11024	5.01283	7.22908	6.96521	4.41585	4.166	4.76733	4.82482	4.16066	5.08643	5.41234	5.82028	6.0552	5.93359	5.20875	6.12152
12919275	NA	NULL	2.18377	2.59443	2.01137	1.78621	1.92524	2.27278	4.14647	3.03626	2.39941	2.31998	1.60788	1.95843	2.43729	2.11055	2.01165	2.8695
12919277	NA	NULL	2.91366	3.04165	2.56167	2.11497	2.79962	3.18643	3.16479	3.0512	2.59963	3.52852	2.76041	2.2056	2.57645	3.18088	3.35604	3.1782
12919279	NA	NULL	2.56547	2.61043	2.73845	2.58242	2.62212	2.22471	3.60184	3.51509	2.65433	2.44036	2.13615	2.5274	3.58236	3.48146	2.95649	2.83887
12919281	NA	NULL	2.12945	1.56137	2.49018	3.33556	1.92477	1.65326	1.96456	1.81963	1.96025	1.99128	2.49898	2.93799	1.66107	1.85554	1.91782	2.14799
12919283	NA	NULL	2.6048	2.74731	3.05712	3.05903	2.73044	2.59856	2.61386	3.59883	2.3476	2.9479	2.78162	3.05881	3.33339	3.45644	3.39613	2.90388
12919285	NA	NULL	1.99028	2.27055	3.85974	2.43047	2.4413	2.29097	2.55459	1.72692	2.10209	2.07492	2.53001	2.4471	2.59348	2.40995	3.623	2.77408
12919287	NA	NULL	3.6679	2.37077	3.51413	5.0632	2.44522	2.38567	3.00034	2.71429	3.5881	2.41767	5.16884	3.83936	2.30083	3.00706	2.22634	3.03814
12919289	NA	NULL	5.17423	4.84824	5.90079	6.8822	5.45623	5.49479	5.5529	4.32217	5.40523	5.35985	6.38556	6.00277	5.93038	5.54782	4.92576	5.72522
12919291	NA	NULL	4.52299	5.1652	5.9739	5.66236	4.20296	4.48196	4.80427	4.11664	4.83485	4.69264	5.43195	4.81731	5.81174	5.10564	5.22158	5.87239
12919293	NA	NULL	1.85163	2.01626	2.23562	1.91032	1.63344	1.79072	1.90951	1.68911	1.70017	1.79131	1.57136	1.98982	1.89393	2.70626	2.10577	2.57435
12919295	NA	NULL	1.76327	1.72812	1.57851	2.05963	1.8212	1.86664	1.83787	1.70482	1.63252	1.69004	2.08813	2.11956	1.90815	1.49891	1.65006	1.69917
12919297	NA	NULL	5.51317	5.10792	6.91637	5.67476	5.12627	4.6939	5.21276	5.12092	5.24132	4.61987	6.29196	6.25621	6.19914	6.51247	6.70616	5.88922
12919299	NA	NULL	2.59361	2.75577	4.0811	3.32173	1.95632	2.54753	3.05564	2.87981	2.75772	2.62289	3.68312	4.05438	6.06464	4.92689	4.52228	5.25703
12919301	NA	NULL	4.55072	5.16265	6.51607	6.33061	4.83063	4.40409	4.55482	4.93125	4.8537	4.99125	6.13566	5.53222	5.62076	5.82232	5.35569	6.14703
12919303	NA	NULL	1.8455	1.84372	2.16759	1.76529	1.86468	1.75412	1.72328	1.79837	1.80412	1.83142	1.76202	1.87854	2.06618	2.02057	1.87746	1.84911
12919305	NA	NULL	2.65958	2.32203	4.93092	3.86864	1.79013	2.13873	2.63415	2.4283	2.15823	1.80121	3.15594	3.44228	2.87301	2.79636	2.97618	2.60304
12919307	NA	NULL	1.46803	1.91796	1.49808	1.61645	1.58138	1.49517	1.52686	1.51962	1.46092	1.47928	1.75506	1.56252	1.89174	1.59315	1.53055	1.52865
12919309	NA	NULL	2.43571	3.16652	2.03345	2.23228	2.97828	2.01183	2.68365	1.99923	2.15848	2.03349	2.43975	2.32529	2.38463	1.77707	2.38176	2.00264
12919311	NA	NULL	3.96855	4.59129	3.75038	3.752	3.16684	4.24022	3.85509	4.0116	4.13739	4.40531	4.21764	3.81128	4.62785	4.91801	5.12141	5.05715
12919313	NA	NULL	2.11826	2.3893	3.70756	2.91063	2.59817	2.97277	2.93144	2.5802	1.86057	2.76642	2.51388	2.90374	2.9393	2.25232	2.66953	2.94655
12919315	NA	NULL	3.64994	2.60998	2.93486	2.62678	2.66649	3.03593	2.65056	2.77926	2.644	2.24903	2.06399	2.48565	2.691	3.10865	3.29774	2.80993
12919317	NA	NULL	3.00843	2.39736	2.58445	2.63902	2.28931	3.38876	3.05896	3.67767	2.84857	3.34227	2.46371	2.19693	2.8866	3.05399	3.23513	3.2213
12919319	NA	NULL	2.29404	2.55202	2.28798	2.39323	3.35713	2.53539	2.15379	2.41399	2.5201	2.62545	2.37102	2.26705	3.62268	3.66606	3.0029	2.80949
12919321	NA	NULL	5.59103	7.03167	6.81701	6.82055	5.7561	5.55948	5.65394	6.56771	5.86196	6.67174	6.57535	6.76076	6.33532	6.3425	6.32085	6.63283
12919323	NA	NULL	3.69059	3.07065	2.63485	3.08616	2.35096	3.14777	3.64001	3.60063	3.69673	3.26782	3.22177	2.9285	2.65538	2.1103	2.786	3.2168
12919325	NA	NULL	9.33945	9.57542	10.9103	10.9751	7.96301	8.14552	9.25267	9.03187	8.8074	9.02951	9.4751	10.3025	10.1357	10.1101	9.84501	10.4081
12919327	NA	NULL	5.4508	4.97906	4.68589	5.56243	5.13888	5.12673	5.18644	4.85023	4.18227	5.81652	4.48727	6.34061	6.89519	6.64794	6.36024	6.17131
12919329	NA	NULL	7.70476	8.21565	9.19125	9.47652	7.42701	7.39811	7.63522	7.76122	7.53323	7.50747	8.88302	9.02906	8.05605	8.38864	7.83702	7.95269
12919331	NA	NULL	4.35503	4.44502	6.83213	7.5391	4.83905	4.95756	5.30192	4.34822	5.02773	4.06221	6.32329	6.56972	5.07733	4.38713	4.97316	5.69681
12919333	NA	NULL	6.35712	4.50444	6.37089	6.05326	4.36928	4.90396	5.16803	5.96367	6.34031	6.05	4.34319	6.16455	7.14747	6.07451	6.70015	6.63579
12919335	NA	NULL	3.11942	2.69509	3.02147	2.37656	3.90211	3.06219	3.09923	3.12564	2.99802	3.52815	3.08391	2.51257	2.12929	2.42226	2.69872	2.48453
12919337	NA	NULL	2.14408	3.51607	5.61226	5.83036	3.51607	4.1123	2.20181	3.88468	3.88651	3.5372	3.47677	5.08834	6.9616	7.56444	6.76064	7.8792
12919339	NA	NULL	3.05869	3.87549	3.84375	4.19965	3.14183	3.3866	3.40248	3.4044	3.89711	3.09289	4.08434	4.21213	4.47186	5.11732	5.52205	5.03552
12919341	NA	NULL	5.51278	5.69175	5.99152	6.55685	5.22917	4.95675	4.75382	4.56224	4.97454	4.83098	6.72617	5.40389	5.83167	5.79971	5.48813	5.86848
12919343	NA	NULL	3.04409	2.60391	2.71845	2.62526	2.67152	2.23463	2.23912	3.04887	2.49955	3.25481	2.87648	2.34129	1.89784	2.1897	3.0194	3.23872
12919345	NA	NULL	1.66285	1.39868	3.11773	2.37541	1.6052	3.64987	1.53443	2.68294	1.46499	1.50315	3.79283	1.86737	1.98074	1.60449	1.80491	1.73137
12919347	NA	NULL	2.24031	2.79162	3.04813	4.21364	2.56039	2.86184	2.32197	2.58771	1.97068	2.65884	3.49385	3.69752	3.76875	4.15948	3.35249	4.12715
12919349	NA	NULL	2.68474	2.9247	3.12941	3.47061	2.87783	1.8645	2.69041	2.7206	2.50614	2.33029	2.81699	3.73363	2.96541	3.97117	3.979	4.07592
12919351	NA	NULL	1.96564	2.64402	3.96583	4.16344	2.31998	2.62211	2.59309	2.236	2.41562	2.03832	3.63978	3.51034	2.56692	3.5415	3.26624	4.58672
12919353	NA	NULL	2.19312	1.70433	1.78066	2.65622	2.09436	2.03095	3.08551	2.22727	1.87277	1.80031	2.90592	2.55573	5.30598	5.05367	3.55366	4.40822
12919355	NA	NULL	1.61312	1.893	1.87456	2.02365	1.7384	1.7947	1.53443	1.87919	1.40189	1.63764	1.58965	1.75218	1.80491	1.60449	1.91359	1.57849
12919357	NA	NULL	1.67231	1.80562	1.90672	1.81032	1.77304	1.63603	1.43568	1.56256	1.58736	2.00631	1.76867	1.83546	1.51944	3.00339	1.94576	1.99341
12919359	NA	NULL	6.30241	6.23965	7.60375	8.004	5.77715	6.15554	6.12659	5.90825	5.56533	6.30794	7.29238	7.51484	8.6305	8.50626	8.39332	8.47596
12919361	NA	NULL	4.85666	4.64387	5.53309	5.71855	4.28729	4.34102	4.54627	4.65235	4.393	4.78499	4.8872	4.73956	3.30239	3.18659	3.19981	3.08532
12919363	NA	NULL	2.99303	2.36998	3.47374	3.2705	2.10131	2.49958	2.89244	2.27449	2.75869	2.74275	3.98342	2.81576	4.21334	3.73285	3.49609	4.2195
12919365	NA	NULL	7.46705	2.84816	3.61435	3.88895	3.48932	4.20571	2.70079	2.14819	6.56834	2.93897	3.27851	3.27842	1.88156	2.14186	2.14531	2.80958
12919367	NA	NULL	2.47909	2.04226	2.47073	1.98048	2.04942	2.02701	1.93956	3.00742	1.9857	2.17459	2.17404	1.90557	2.24274	2.31659	2.4279	2.69476
12919369	NA	NULL	1.75268	1.95602	2.66092	1.82939	2.26545	2.01633	1.90077	2.39988	2.17439	2.04275	2.42894	2.12036	1.81345	2.07845	1.64011	1.96736
12919371	NA	NULL	1.71827	1.74616	2.11353	2.43853	1.76692	1.98034	1.52244	1.97511	1.66314	1.76166	1.70346	2.0635	1.69364	1.60462	1.56114	1.73691
12919373	NA	NULL	2.41553	2.74161	3.24792	3.94508	2.64834	2.35094	2.39355	2.98536	2.64013	2.47296	2.77211	3.65909	2.24947	3.14135	3.12249	2.00845
12919375	NA	NULL	3.25773	3.67716	4.35694	4.95671	3.05059	3.26338	3.19681	3.7849	3.47206	3.36795	4.93139	3.92172	3.18411	5.39581	4.82603	4.9889
12919377	NA	NULL	4.37928	4.36436	6.59799	5.90142	3.4952	4.24662	4.8392	3.84512	4.16076	4.30674	5.47279	5.39996	4.52129	4.32909	4.24258	4.70759
12919379	NA	NULL	2.43647	1.90872	2.21215	2.39731	2.60989	2.19156	2.20644	1.67699	1.95342	2.66263	1.89146	2.05532	2.21812	1.77828	2.26577	2.51441
12919381	NA	NULL	2.37287	1.87757	2.34119	2.24084	2.54399	2.87613	3.7063	2.9548	2.04394	2.03069	2.73387	2.0402	1.66571	2.07781	2.31238	2.62587
12919383	NA	NULL	2.00929	2.48216	1.95685	1.88072	2.09546	2.31108	2.29564	1.88649	1.7986	2.21607	1.93375	1.74026	1.82618	2.29642	1.69675	2.20499
12919385	NA	NULL	5.55385	4.58083	6.93866	7.0225	4.96612	4.85644	4.43688	3.97988	5.45714	4.50001	6.85368	6.20749	8.17724	8.1165	7.39139	7.86502
12919387	NA	NULL	1.64002	1.71843	1.50184	1.5651	1.64942	1.85624	1.78259	1.97212	1.67769	1.9358	1.5086	1.55208	1.58968	1.76087	1.51351	1.70112
12919389	NA	NULL	1.93251	1.8147	1.57955	1.60399	2.2421	1.68231	1.68969	1.89091	1.77513	1.7741	1.6303	1.53258	2.06026	1.8355	1.74897	2.07974
12919391	NA	NULL	2.7567	3.25037	5.36575	5.46276	3.36005	3.90817	2.97092	3.5051	2.76828	2.64793	3.12525	5.1777	4.41252	4.46129	3.09981	4.06315
12919393	NA	NULL	1.98244	2.52011	3.95514	4.97323	2.60725	2.70667	2.82933	2.9793	2.33908	2.61697	2.88435	3.4967	2.62579	2.28816	2.55172	2.48153
12919395	NA	NULL	1.94219	2.18039	3.51999	2.26498	2.02741	2.38971	1.86186	2.15971	1.93323	2.2247	2.19313	1.78048	1.89693	2.69462	2.08655	2.68326
12919397	NA	NULL	4.03009	3.95244	3.78414	4.07071	3.39051	3.45605	3.7515	3.74182	3.34647	3.97452	3.61725	4.25957	4.48853	4.52426	4.52597	5.21681
12919399	NA	NULL	7.28616	7.43716	8.41318	8.43492	4.96566	5.30939	6.8205	6.74267	6.44196	6.76108	7.0292	8.12089	7.834	7.88489	8.00962	7.89715
12919401	NA	NULL	4.08501	4.64082	3.38003	3.70809	4.39839	3.46384	4.4133	4.22315	3.82686	4.68419	3.43536	4.21387	4.8497	3.71119	3.96905	4.6538
12919403	NA	NULL	2.36549	3.82117	1.88708	1.89256	1.73982	1.71937	2.77418	2.05346	2.85785	2.34154	1.53517	2.00636	2.7073	2.01384	2.04	2.43846
12919405	NA	NULL	2.40413	2.24737	2.3866	2.00549	2.12124	1.98691	2.13765	2.38202	2.41439	2.5525	2.27875	2.00122	2.0024	2.10902	1.66556	2.05798
12919407	NA	NULL	2.79676	2.88571	2.51741	2.06829	3.38065	2.32642	3.12544	2.65016	2.29451	3.16601	2.25307	2.73006	2.40162	2.29703	2.44022	2.51219
12919409	NA	NULL	1.89854	1.41436	2.24527	2.09121	1.48026	1.76853	1.49078	1.6411	2.44268	1.93046	1.58965	2.49955	1.74004	1.75377	1.67231	1.83721
12919411	NA	NULL	3.24021	3.77116	3.21584	2.80239	3.09379	3.4463	4.5896	4.23134	3.31525	5.11912	3.4174	3.81028	3.62901	3.36327	2.95727	2.7482
12919413	NA	NULL	3.27214	3.73671	4.45768	4.6222	3.1585	4.06782	3.97594	3.79999	2.68078	3.88744	3.72231	4.88114	3.52108	3.42579	3.97835	4.0759
12919415	NA	NULL	4.59583	5.07854	4.44631	3.16983	4.69089	4.73966	4.93365	5.21146	4.14753	5.19914	3.74552	4.3622	3.56447	4.26596	4.44565	4.69515
12919417	NA	NULL	2.8254	2.77474	2.0397	3.09323	2.21805	1.84817	2.46029	2.26758	2.89466	2.40893	3.0766	2.36811	2.14186	2.38432	2.55394	2.67619
12919419	NA	NULL	2.12136	2.07152	2.20927	2.42574	1.76583	2.15332	2.21241	2.39509	1.95792	2.04483	1.96779	2.24442	2.67465	2.32327	2.5073	2.5795
12919421	NA	NULL	3.19041	4.34515	6.58052	6.47255	3.81226	3.72773	3.69035	4.29872	3.50623	3.02579	4.42605	5.60408	5.91816	6.54129	6.27928	6.12121
12919423	NA	NULL	4.16194	3.03703	4.44308	3.89432	3.28866	4.27562	4.71484	3.35861	3.85904	4.31584	3.46508	4.68625	3.25025	3.69247	4.36085	4.20578
12919425	NA	NULL	2.23186	2.36622	3.3692	2.28064	1.86382	1.95982	2.13036	1.83224	1.99555	2.50759	2.42409	2.01741	2.22279	1.93452	2.34721	3.15827
12919427	NA	NULL	2.07731	1.70749	1.99095	1.85498	2.49547	2.37217	2.12823	2.15282	1.9245	2.12364	2.41917	2.4573	1.74201	1.92778	1.92465	2.37357
12919429	NA	NULL	1.53386	2.3419	1.9734	1.62136	2.04103	1.77196	1.64832	2.00675	2.07314	1.76869	1.66161	1.55375	1.93391	2.21951	2.16124	2.86802
12919431	NA	NULL	1.88612	1.77882	1.79657	1.71763	1.85626	1.82468	1.8278	2.19764	1.63383	1.83992	1.8239	1.78441	2.02442	1.86359	1.62523	1.66299
12919433	NA	NULL	2.17419	1.9261	1.91903	1.89	2.58617	2.21951	2.57057	2.46016	1.91524	2.17743	2.13479	1.7805	2.56748	1.8722	1.95069	2.04656
12919435	NA	NULL	2.30339	3.5703	2.17039	3.07765	2.13912	2.66937	2.94239	2.90669	2.4351	3.11904	2.46419	3.02627	2.38972	2.31649	2.80231	2.55514
12919437	NA	NULL	3.02794	3.66815	2.76498	3.16495	3.06359	4.04564	3.01808	3.33637	2.03891	3.17449	3.20675	3.32212	3.16596	3.87487	3.55242	3.23796
12919439	NA	NULL	1.68957	1.4749	2.21017	1.69956	1.75424	2.05675	1.57622	1.75416	1.82624	1.82608	2.25162	1.93972	1.56822	2.03295	1.76831	1.66367
12919441	NA	NULL	2.50391	2.77778	2.16692	2.55847	2.16471	2.29121	3.19599	2.97056	2.26654	3.05535	2.20452	3.46328	3.04619	3.02822	2.92938	3.00205
12919443	NA	NULL	3.04513	2.98423	2.82699	3.51807	3.90774	3.33422	4.01516	3.70866	1.70698	3.35576	2.71824	3.22161	4.03374	3.99875	3.68408	3.58506
12919445	NA	NULL	1.97558	1.87915	2.0026	2.26383	1.60571	2.14744	1.88479	2.08627	1.67282	2.24084	2.35608	1.8797	1.46721	2.04791	1.90215	2.40019
12919447	NA	NULL	3.7129	3.515	3.45834	3.49909	2.95308	3.01862	3.31506	3.30439	3.04949	3.16772	3.36183	3.83621	4.28292	4.06078	3.92223	3.93815
12919449	NA	NULL	7.28616	7.43716	8.41318	8.43492	4.96566	5.30939	6.8205	6.74267	6.44196	6.76108	7.0292	8.12089	7.834	7.88489	8.00962	7.89715
12919451	NA	NULL	4.08501	4.64082	3.38003	3.70809	4.39839	3.46384	4.4133	4.22315	3.82686	4.68419	3.43536	4.21387	4.8497	3.71119	3.96905	4.6538
12919453	NA	NULL	2.36549	3.82117	1.88708	1.89256	1.73982	1.71937	2.77418	2.05346	2.85785	2.34154	1.53517	2.00636	2.7073	2.01384	2.04	2.43846
12919455	NA	NULL	2.40413	2.24737	2.3866	2.00549	2.12124	1.98691	2.13765	2.38202	2.41439	2.5525	2.27875	2.00122	2.0024	2.10902	1.66556	2.05798
12919457	NA	NULL	2.79676	2.88571	2.51741	2.06829	3.38065	2.32642	3.12544	2.65016	2.29451	3.16601	2.25307	2.73006	2.40162	2.29703	2.44022	2.51219
12919459	NA	NULL	1.89854	1.41436	2.24527	2.09121	1.48026	1.76853	1.49078	1.6411	2.44268	1.93046	1.58965	2.49955	1.74004	1.75377	1.67231	1.83721
12919461	NA	NULL	3.24021	3.77116	3.21584	2.80239	3.09379	3.4463	4.5896	4.23134	3.31525	5.11912	3.4174	3.81028	3.62901	3.36327	2.95727	2.7482
12919463	NA	NULL	3.27214	3.73671	4.45768	4.6222	3.1585	4.06782	3.97594	3.79999	2.68078	3.88744	3.72231	4.88114	3.52108	3.42579	3.97835	4.0759
12919465	NA	NULL	4.59583	5.07854	4.44631	3.16983	4.69089	4.73966	4.93365	5.21146	4.14753	5.19914	3.74552	4.3622	3.56447	4.26596	4.44565	4.69515
12919467	NA	NULL	2.8254	2.77474	2.0397	3.09323	2.21805	1.84817	2.46029	2.26758	2.89466	2.40893	3.0766	2.36811	2.14186	2.38432	2.55394	2.67619
12919469	NA	NULL	2.12136	2.07152	2.20927	2.42574	1.76583	2.15332	2.21241	2.39509	1.95792	2.04483	1.96779	2.24442	2.67465	2.32327	2.5073	2.5795
12919471	NA	NULL	3.19041	4.34515	6.58052	6.47255	3.81226	3.72773	3.69035	4.29872	3.50623	3.02579	4.42605	5.60408	5.91816	6.54129	6.27928	6.12121
12919473	NA	NULL	4.16194	3.03703	4.44308	3.89432	3.28866	4.27562	4.71484	3.35861	3.85904	4.31584	3.46508	4.68625	3.25025	3.69247	4.36085	4.20578
12919475	NA	NULL	2.23186	2.36622	3.3692	2.28064	1.86382	1.95982	2.13036	1.83224	1.99555	2.50759	2.42409	2.01741	2.22279	1.93452	2.34721	3.15827
12919477	NA	NULL	2.07731	1.70749	1.99095	1.85498	2.49547	2.37217	2.12823	2.15282	1.9245	2.12364	2.41917	2.4573	1.74201	1.92778	1.92465	2.37357
12919479	NA	NULL	1.53386	2.3419	1.9734	1.62136	2.04103	1.77196	1.64832	2.00675	2.07314	1.76869	1.66161	1.55375	1.93391	2.21951	2.16124	2.86802
12919481	NA	NULL	1.88612	1.77882	1.79657	1.71763	1.85626	1.82468	1.8278	2.19764	1.63383	1.83992	1.8239	1.78441	2.02442	1.86359	1.62523	1.66299
12919483	NA	NULL	2.17419	1.9261	1.91903	1.89	2.58617	2.21951	2.57057	2.46016	1.91524	2.17743	2.13479	1.7805	2.56748	1.8722	1.95069	2.04656
12919485	NA	NULL	2.30339	3.5703	2.17039	3.07765	2.13912	2.66937	2.94239	2.90669	2.4351	3.11904	2.46419	3.02627	2.38972	2.31649	2.80231	2.55514
12919487	NA	NULL	3.02794	3.66815	2.76498	3.16495	3.06359	4.04564	3.01808	3.33637	2.03891	3.17449	3.20675	3.32212	3.16596	3.87487	3.55242	3.23796
12919489	NA	NULL	1.68957	1.4749	2.21017	1.69956	1.75424	2.05675	1.57622	1.75416	1.82624	1.82608	2.25162	1.93972	1.56822	2.03295	1.76831	1.66367
12919491	NA	NULL	2.50391	2.77778	2.16692	2.55847	2.16471	2.29121	3.19599	2.97056	2.26654	3.05535	2.20452	3.46328	3.04619	3.02822	2.92938	3.00205
12919493	NA	NULL	3.04513	2.98423	2.82699	3.51807	3.90774	3.33422	4.01516	3.70866	1.70698	3.35576	2.71824	3.22161	4.03374	3.99875	3.68408	3.58506
12919495	NA	NULL	4.08234	5.24968	5.71005	6.3504	4.39242	4.71389	5.02064	5.19137	4.49874	4.84784	5.76624	5.18082	6.1736	5.60002	5.64526	5.59944
12919497	NA	NULL	1.75777	1.6837	2.14152	1.99035	1.86728	1.62027	1.75464	1.9154	1.7041	1.64999	1.4071	1.73811	1.82445	1.7145	1.75146	1.96688
12919499	NA	NULL	2.59545	2.59581	2.58998	2.17094	2.04949	2.89798	3.33017	3.85836	2.27754	2.86636	1.99322	3.46728	2.58156	2.95542	2.41969	2.90213
12919501	NA	NULL	3.39808	3.71664	2.04935	1.88045	3.35417	2.23463	4.51993	4.11548	3.0766	2.26608	3.42145	4.03404	1.66571	2.23912	2.55394	2.83402
12919503	NA	NULL	5.12361	5.1773	6.29601	6.35313	4.09694	4.24248	5.54345	4.96114	4.20148	4.98596	5.36981	5.81298	5.71482	5.51443	5.50029	5.98024
12919505	NA	NULL	3.63269	4.23406	2.91187	2.4408	2.84993	2.67313	2.72701	2.88726	2.48509	3.12605	3.73447	3.72816	4.02956	4.9838	4.70365	4.37901
12919507	NA	NULL	3.40531	2.66771	3.76595	2.51777	2.68446	2.32556	2.20181	3.26726	3.07736	3.23701	2.15544	3.6791	2.49955	2.50538	2.44681	2.12038
12919509	NA	NULL	4.30346	3.68015	3.83564	4.20295	3.44419	3.92991	4.15731	3.74466	3.85838	3.52212	5.03648	3.80314	2.57362	2.21672	3.83286	3.08977
12919511	NA	NULL	2.22789	2.49613	1.85656	2.24279	2.31801	2.40973	2.60773	2.72097	1.93187	3.44158	2.26533	2.06302	2.69068	2.00162	2.23983	2.61002
12919513	NA	NULL	2.60062	2.32545	2.38508	2.80423	3.27371	2.48367	3.4528	2.79245	2.75756	2.86849	2.04869	2.46153	2.37275	2.18558	2.21386	3.05798
12919515	NA	NULL	2.30686	2.89617	3.27078	2.9896	2.67754	2.84286	3.08733	2.75936	3.19084	3.35031	2.87157	2.57374	2.15891	2.72147	3.15272	2.67117
12919517	NA	NULL	3.41034	3.64732	5.45294	4.43294	4.78446	4.77474	4.81559	3.50072	4.56269	4.35147	4.07383	5.04402	4.9277	4.76411	4.93997	4.69011
12919519	NA	NULL	4.58039	4.39442	8.41815	8.89564	5.2698	4.97186	5.4666	4.641	5.06248	5.2733	7.36947	7.8834	6.02398	5.02202	6.72882	6.20083
12919521	NA	NULL	2.16068	2.53309	3.3669	2.53622	3.04058	3.1865	2.55636	2.59993	2.76175	2.60635	4.16109	3.40929	3.32073	4.29443	3.64428	3.48556
12919523	NA	NULL	5.29722	5.62771	3.4817	4.12663	5.30257	5.27412	5.51858	5.91024	4.94243	6.39069	3.26394	4.2476	5.39067	4.6737	5.04606	4.90395
12919525	NA	NULL	1.85201	2.74538	2.08235	1.90145	2.2691	2.74048	1.91609	2.63797	1.80666	2.07394	1.94012	2.13513	2.65318	2.03596	2.47908	2.30271
12919527	NA	NULL	3.16	3.11737	2.91996	3.42518	3.04937	2.54348	4.11643	3.52101	3.39569	3.16321	4.47915	3.88387	3.80659	3.58356	3.45503	3.11432
12919529	NA	NULL	2.99313	3.89728	2.89366	2.90799	4.23263	4.07829	4.54482	3.38124	3.39284	3.99036	3.57744	4.01497	3.74722	4.05787	3.5297	3.84289
12919531	NA	NULL	5.52085	5.3004	6.26006	6.80466	4.80679	4.94526	6.49933	5.10542	5.25903	5.39433	5.65844	5.878	5.24588	5.30259	5.68624	6.00092
12919533	NA	NULL	2.65505	2.95412	1.90162	2.11903	2.80996	2.36641	3.27369	2.45583	3.49495	2.85693	1.84767	2.84389	2.59449	3.57944	3.0868	2.81608
12919535	NA	NULL	2.82846	2.10736	2.55265	2.89768	1.98399	2.28563	2.81412	2.62356	2.65551	2.00854	4.42623	2.64953	3.10773	3.35205	3.22759	2.92208
12919537	NA	NULL	2.35091	1.49697	2.23218	2.13233	1.73363	1.83422	2.31591	2.04335	2.36419	1.90076	2.17636	2.01877	2.2211	2.62616	3.7321	2.28996
12919539	NA	NULL	1.95524	2.24015	4.49976	3.43323	2.7484	3.02768	2.34944	4.07267	3.29023	2.93826	2.06136	2.72144	4.77965	4.56778	5.12068	3.94702
12919541	NA	NULL	3.0521	2.47771	1.99275	1.95396	1.99143	1.99678	2.67216	1.95982	2.60671	2.4553	2.11406	1.88588	2.93825	2.95975	2.94796	3.69625
12919543	NA	NULL	1.96792	2.08694	2.97806	2.67495	2.0695	2.24566	2.43932	2.88076	2.55846	2.52064	2.59761	2.53796	2.21586	2.47219	2.50958	2.74408
12919545	NA	NULL	1.7002	1.67506	1.59269	1.80459	1.62593	1.67042	2.10816	1.4993	1.6434	1.59253	1.55884	1.63951	1.71279	1.80961	1.69272	1.63804
12919547	NA	NULL	6.39179	4.74708	6.08178	5.91905	4.89583	5.01927	4.39601	5.1992	6.38863	4.76557	4.65278	5.32249	5.1572	5.36287	5.87943	4.75521
12919549	NA	NULL	2.26096	1.91519	2.32806	2.6456	2.05623	1.96585	2.06506	2.22588	1.83589	1.85217	1.93404	2.86061	2.39489	2.55156	2.39802	3.31727
12919551	NA	NULL	3.99309	4.07282	5.85946	4.40237	3.04588	3.82093	3.13773	3.86329	4.29398	3.6889	4.90514	5.8676	4.94351	3.66277	4.55838	4.90303
12919553	NA	NULL	3.12427	3.55801	3.30167	4.48006	3.96817	4.42412	3.72151	4.21145	4.13211	3.97775	3.78183	4.09328	3.27596	3.38489	3.52803	4.19383
12919555	NA	NULL	6.82798	6.48525	8.86016	8.2908	6.6765	7.00752	7.38198	6.11243	7.50671	6.85433	7.78497	8.08743	8.5508	7.72349	7.92658	7.77384
12919557	NA	NULL	4.30064	4.31205	4.23188	3.65884	4.55024	4.28358	4.73185	3.71535	4.5469	4.00298	3.87079	4.57694	4.40133	4.48411	4.3742	4.59104
12919559	NA	NULL	5.01955	5.20605	4.57179	3.98943	3.49352	4.36996	6.00968	4.88287	5.34083	5.04156	4.52371	5.03334	6.08375	5.67634	5.13201	5.45415
12919561	NA	NULL	3.72406	5.13393	3.35114	3.43346	4.3247	4.31949	5.37934	5.03372	4.77658	5.15275	2.96298	3.54227	4.49427	3.25371	4.24777	4.30164
12919563	NA	NULL	4.77346	5.86951	5.84423	6.15718	5.88047	5.13717	6.01482	5.66521	5.70464	5.94596	6.08261	7.20889	5.25847	5.37119	5.43219	5.30785
12919565	NA	NULL	5.33672	5.70145	8.9072	8.89739	6.7482	6.78118	6.56549	6.42865	6.36379	6.38203	8.26747	8.0272	7.14595	7.32129	6.70246	6.97175
12919567	NA	NULL	5.28923	5.74215	6.37852	6.34697	6.06995	6.27395	6.10427	5.3429	6.02151	5.90852	5.67585	6.2722	6.03075	6.34685	6.68493	5.67158
12919569	NA	NULL	6.97024	6.55874	7.70372	7.33845	5.92292	6.10298	6.33216	6.45962	6.94469	6.88446	6.87229	7.67515	6.88816	7.59463	6.36325	7.06493
12919571	NA	NULL	5.33075	5.79774	8.55296	7.28302	7.16348	6.43736	6.42806	5.62631	6.37574	6.07606	7.35138	8.93104	7.10947	6.2232	6.87087	7.17782
12919573	NA	NULL	7.49492	7.87235	10.3222	10.384	8.95079	8.0795	8.00701	8.08381	6.99358	7.94471	9.94645	10.315	9.03418	8.674	8.45664	8.82961
12919575	NA	NULL	2.27183	2.20219	1.94989	2.0055	2.62396	2.4569	2.5787	2.74506	2.5308	2.01027	2.04771	1.94866	2.46371	1.82674	2.27778	1.84478
12919577	NA	NULL	4.25848	4.32143	4.30818	5.61846	3.84263	3.6434	4.49663	3.78636	4.41558	3.8106	4.16275	5.50019	5.06001	4.74242	4.50005	4.78635
12919579	NA	NULL	3.06921	2.87162	1.87749	1.86732	3.25344	3.2948	3.55174	3.41837	3.29044	3.61294	2.20813	2.80689	2.38657	2.71877	2.60705	2.12604
12919581	NA	NULL	2.04556	2.42151	1.75233	1.49133	2.08642	2.19056	2.76518	2.74631	2.65052	2.95223	1.92902	2.01972	2.44754	2.33917	2.36026	2.47216
12919583	NA	NULL	3.60063	4.98951	3.92712	3.01542	3.8203	4.73824	5.07596	4.52028	5.40929	4.67023	4.11918	5.05519	3.13311	2.83172	3.49507	3.37277
12919585	NA	NULL	5.67777	6.27555	6.32246	6.31377	5.96828	6.25564	5.27216	6.22947	5.82957	5.68275	5.68223	6.74215	6.62581	7.56444	6.6507	6.19387
12919587	NA	NULL	2.7485	2.40585	1.9045	1.66236	2.06143	2.26621	4.22878	2.33815	4.01222	2.90043	1.82738	2.0806	2.89624	1.85555	1.87667	2.31873
12919589	NA	NULL	4.48739	4.07707	4.21141	3.90244	3.94042	4.07612	4.58094	4.79779	4.38283	4.31846	3.0524	4.73727	3.59754	4.19921	3.76038	4.28671
12919591	NA	NULL	5.82497	6.16102	5.14888	4.94964	6.32201	6.50059	6.77033	6.54522	5.96502	6.07037	5.09383	6.73219	6.13034	5.61022	6.29168	6.16673
12919593	NA	NULL	4.75152	4.79212	6.22784	6.18451	4.7553	5.38433	5.09178	5.14762	4.9123	4.82495	5.74103	5.01358	4.57796	4.84833	3.91509	4.32329
12919595	NA	NULL	5.10558	5.80891	4.03446	3.55679	6.49603	6.6068	5.50406	6.0026	5.85018	6.17105	5.01064	6.51668	3.72915	4.86217	3.85087	4.74617
12919597	NA	NULL	3.71045	4.61939	3.19494	2.80665	4.96938	4.42996	5.59706	5.58143	3.36996	5.21565	3.49303	3.69307	3.35909	2.38104	3.00487	2.39279
12919599	NA	NULL	3.47135	3.26321	2.28764	2.42243	5.12125	4.12978	3.54287	3.46208	4.79488	5.0742	2.59316	3.56553	2.54109	2.61123	2.64438	2.63071
12919601	NA	NULL	3.29596	4.14898	3.34132	3.50145	4.8586	4.49133	4.47035	4.60559	3.53209	4.33185	3.5342	3.1957	4.07053	3.58908	3.22127	3.46949
12919603	NA	NULL	1.94219	2.18039	3.51999	2.26498	2.02741	2.38971	1.86186	2.15971	1.93323	2.2247	2.19313	1.78048	1.89693	2.69462	2.08655	2.68326
12919605	NA	NULL	4.03009	3.95244	3.78414	4.07071	3.39051	3.45605	3.7515	3.74182	3.34647	3.97452	3.61725	4.25957	4.48853	4.52426	4.52597	5.21681
12919607	NA	NULL	7.28616	7.43716	8.41318	8.43492	4.96566	5.30939	6.8205	6.74267	6.44196	6.76108	7.0292	8.12089	7.834	7.88489	8.00962	7.89715
12919609	NA	NULL	4.08501	4.64082	3.38003	3.70809	4.39839	3.46384	4.4133	4.22315	3.82686	4.68419	3.43536	4.21387	4.8497	3.71119	3.96905	4.6538
12919611	NA	NULL	2.36549	3.82117	1.88708	1.89256	1.73982	1.71937	2.77418	2.05346	2.85785	2.34154	1.53517	2.00636	2.7073	2.01384	2.04	2.43846
12919613	NA	NULL	2.40413	2.24737	2.3866	2.00549	2.12124	1.98691	2.13765	2.38202	2.41439	2.5525	2.27875	2.00122	2.0024	2.10902	1.66556	2.05798
12919615	NA	NULL	2.79676	2.88571	2.51741	2.06829	3.38065	2.32642	3.12544	2.65016	2.29451	3.16601	2.25307	2.73006	2.40162	2.29703	2.44022	2.51219
12919617	NA	NULL	1.89854	1.41436	2.24527	2.09121	1.48026	1.76853	1.49078	1.6411	2.44268	1.93046	1.58965	2.49955	1.74004	1.75377	1.67231	1.83721
12919619	NA	NULL	3.24021	3.77116	3.21584	2.80239	3.09379	3.4463	4.5896	4.23134	3.31525	5.11912	3.4174	3.81028	3.62901	3.36327	2.95727	2.7482
12919621	NA	NULL	3.27214	3.73671	4.45768	4.6222	3.1585	4.06782	3.97594	3.79999	2.68078	3.88744	3.72231	4.88114	3.52108	3.42579	3.97835	4.0759
12919623	NA	NULL	4.59583	5.07854	4.44631	3.16983	4.69089	4.73966	4.93365	5.21146	4.14753	5.19914	3.74552	4.3622	3.56447	4.26596	4.44565	4.69515
12919625	NA	NULL	2.8254	2.77474	2.0397	3.09323	2.21805	1.84817	2.46029	2.26758	2.89466	2.40893	3.0766	2.36811	2.14186	2.38432	2.55394	2.67619
12919627	NA	NULL	2.12136	2.07152	2.20927	2.42574	1.76583	2.15332	2.21241	2.39509	1.95792	2.04483	1.96779	2.24442	2.67465	2.32327	2.5073	2.5795
12919629	NA	NULL	3.19041	4.34515	6.58052	6.47255	3.81226	3.72773	3.69035	4.29872	3.50623	3.02579	4.42605	5.60408	5.91816	6.54129	6.27928	6.12121
12919631	NA	NULL	4.16194	3.03703	4.44308	3.89432	3.28866	4.27562	4.71484	3.35861	3.85904	4.31584	3.46508	4.68625	3.25025	3.69247	4.36085	4.20578
12919633	NA	NULL	2.23186	2.36622	3.3692	2.28064	1.86382	1.95982	2.13036	1.83224	1.99555	2.50759	2.42409	2.01741	2.22279	1.93452	2.34721	3.15827
12919635	NA	NULL	2.07731	1.70749	1.99095	1.85498	2.49547	2.37217	2.12823	2.15282	1.9245	2.12364	2.41917	2.4573	1.74201	1.92778	1.92465	2.37357
12919637	NA	NULL	1.53386	2.3419	1.9734	1.62136	2.04103	1.77196	1.64832	2.00675	2.07314	1.76869	1.66161	1.55375	1.93391	2.21951	2.16124	2.86802
12919639	NA	NULL	1.88612	1.77882	1.79657	1.71763	1.85626	1.82468	1.8278	2.19764	1.63383	1.83992	1.8239	1.78441	2.02442	1.86359	1.62523	1.66299
12919641	NA	NULL	2.17419	1.9261	1.91903	1.89	2.58617	2.21951	2.57057	2.46016	1.91524	2.17743	2.13479	1.7805	2.56748	1.8722	1.95069	2.04656
12919643	NA	NULL	2.30339	3.5703	2.17039	3.07765	2.13912	2.66937	2.94239	2.90669	2.4351	3.11904	2.46419	3.02627	2.38972	2.31649	2.80231	2.55514
12919645	NA	NULL	3.02794	3.66815	2.76498	3.16495	3.06359	4.04564	3.01808	3.33637	2.03891	3.17449	3.20675	3.32212	3.16596	3.87487	3.55242	3.23796
12919647	NA	NULL	1.68957	1.4749	2.21017	1.69956	1.75424	2.05675	1.57622	1.75416	1.82624	1.82608	2.25162	1.93972	1.56822	2.03295	1.76831	1.66367
12919649	NA	NULL	2.50391	2.77778	2.16692	2.55847	2.16471	2.29121	3.19599	2.97056	2.26654	3.05535	2.20452	3.46328	3.04619	3.02822	2.92938	3.00205
12919651	NA	NULL	3.04513	2.98423	2.82699	3.51807	3.90774	3.33422	4.01516	3.70866	1.70698	3.35576	2.71824	3.22161	4.03374	3.99875	3.68408	3.58506
12919653	NA	NULL	1.97558	1.87915	2.0026	2.26383	1.60571	2.14744	1.88479	2.08627	1.67282	2.24084	2.35608	1.8797	1.46721	2.04791	1.90215	2.40019
12919655	NA	NULL	3.7129	3.515	3.45834	3.49909	2.95308	3.01862	3.31506	3.30439	3.04949	3.16772	3.36183	3.83621	4.28292	4.06078	3.92223	3.93815
12919657	NA	NULL	7.28616	7.43716	8.41318	8.43492	4.96566	5.30939	6.8205	6.74267	6.44196	6.76108	7.0292	8.12089	7.834	7.88489	8.00962	7.89715
12919659	NA	NULL	4.08501	4.64082	3.38003	3.70809	4.39839	3.46384	4.4133	4.22315	3.82686	4.68419	3.43536	4.21387	4.8497	3.71119	3.96905	4.6538
12919661	NA	NULL	2.36549	3.82117	1.88708	1.89256	1.73982	1.71937	2.77418	2.05346	2.85785	2.34154	1.53517	2.00636	2.7073	2.01384	2.04	2.43846
12919663	NA	NULL	2.40413	2.24737	2.3866	2.00549	2.12124	1.98691	2.13765	2.38202	2.41439	2.5525	2.27875	2.00122	2.0024	2.10902	1.66556	2.05798
12919665	NA	NULL	2.79676	2.88571	2.51741	2.06829	3.38065	2.32642	3.12544	2.65016	2.29451	3.16601	2.25307	2.73006	2.40162	2.29703	2.44022	2.51219
12919667	NA	NULL	1.89854	1.41436	2.24527	2.09121	1.48026	1.76853	1.49078	1.6411	2.44268	1.93046	1.58965	2.49955	1.74004	1.75377	1.67231	1.83721
12919669	NA	NULL	3.24021	3.77116	3.21584	2.80239	3.09379	3.4463	4.5896	4.23134	3.31525	5.11912	3.4174	3.81028	3.62901	3.36327	2.95727	2.7482
12919671	NA	NULL	3.27214	3.73671	4.45768	4.6222	3.1585	4.06782	3.97594	3.79999	2.68078	3.88744	3.72231	4.88114	3.52108	3.42579	3.97835	4.0759
12919673	NA	NULL	4.59583	5.07854	4.44631	3.16983	4.69089	4.73966	4.93365	5.21146	4.14753	5.19914	3.74552	4.3622	3.56447	4.26596	4.44565	4.69515
12919675	NA	NULL	2.8254	2.77474	2.0397	3.09323	2.21805	1.84817	2.46029	2.26758	2.89466	2.40893	3.0766	2.36811	2.14186	2.38432	2.55394	2.67619
12919677	NA	NULL	2.12136	2.07152	2.20927	2.42574	1.76583	2.15332	2.21241	2.39509	1.95792	2.04483	1.96779	2.24442	2.67465	2.32327	2.5073	2.5795
12919679	NA	NULL	3.19041	4.34515	6.58052	6.47255	3.81226	3.72773	3.69035	4.29872	3.50623	3.02579	4.42605	5.60408	5.91816	6.54129	6.27928	6.12121
12919681	NA	NULL	4.16194	3.03703	4.44308	3.89432	3.28866	4.27562	4.71484	3.35861	3.85904	4.31584	3.46508	4.68625	3.25025	3.69247	4.36085	4.20578
12919683	NA	NULL	2.23186	2.36622	3.3692	2.28064	1.86382	1.95982	2.13036	1.83224	1.99555	2.50759	2.42409	2.01741	2.22279	1.93452	2.34721	3.15827
12919685	NA	NULL	2.07731	1.70749	1.99095	1.85498	2.49547	2.37217	2.12823	2.15282	1.9245	2.12364	2.41917	2.4573	1.74201	1.92778	1.92465	2.37357
12919687	NA	NULL	1.53386	2.3419	1.9734	1.62136	2.04103	1.77196	1.64832	2.00675	2.07314	1.76869	1.66161	1.55375	1.93391	2.21951	2.16124	2.86802
12919689	NA	NULL	1.88612	1.77882	1.79657	1.71763	1.85626	1.82468	1.8278	2.19764	1.63383	1.83992	1.8239	1.78441	2.02442	1.86359	1.62523	1.66299
12919691	NA	NULL	2.17419	1.9261	1.91903	1.89	2.58617	2.21951	2.57057	2.46016	1.91524	2.17743	2.13479	1.7805	2.56748	1.8722	1.95069	2.04656
12919693	NA	NULL	2.30339	3.5703	2.17039	3.07765	2.13912	2.66937	2.94239	2.90669	2.4351	3.11904	2.46419	3.02627	2.38972	2.31649	2.80231	2.55514
12919695	NA	NULL	3.02794	3.66815	2.76498	3.16495	3.06359	4.04564	3.01808	3.33637	2.03891	3.17449	3.20675	3.32212	3.16596	3.87487	3.55242	3.23796
12919697	NA	NULL	1.68957	1.4749	2.21017	1.69956	1.75424	2.05675	1.57622	1.75416	1.82624	1.82608	2.25162	1.93972	1.56822	2.03295	1.76831	1.66367
12919699	NA	NULL	2.50391	2.77778	2.16692	2.55847	2.16471	2.29121	3.19599	2.97056	2.26654	3.05535	2.20452	3.46328	3.04619	3.02822	2.92938	3.00205
12919701	NA	NULL	3.04513	2.98423	2.82699	3.51807	3.90774	3.33422	4.01516	3.70866	1.70698	3.35576	2.71824	3.22161	4.03374	3.99875	3.68408	3.58506
12919703	NA	NULL	4.08234	5.24968	5.71005	6.3504	4.39242	4.71389	5.02064	5.19137	4.49874	4.84784	5.76624	5.18082	6.1736	5.60002	5.64526	5.59944
12919705	NA	NULL	1.75777	1.6837	2.14152	1.99035	1.86728	1.62027	1.75464	1.9154	1.7041	1.64999	1.4071	1.73811	1.82445	1.7145	1.75146	1.96688
12919707	NA	NULL	2.59545	2.59581	2.58998	2.17094	2.04949	2.89798	3.33017	3.85836	2.27754	2.86636	1.99322	3.46728	2.58156	2.95542	2.41969	2.90213
12919709	NA	NULL	3.39808	3.71664	2.04935	1.88045	3.35417	2.23463	4.51993	4.11548	3.0766	2.26608	3.42145	4.03404	1.66571	2.23912	2.55394	2.83402
12919711	NA	NULL	5.12361	5.1773	6.29601	6.35313	4.09694	4.24248	5.54345	4.96114	4.20148	4.98596	5.36981	5.81298	5.71482	5.51443	5.50029	5.98024
12919713	NA	NULL	3.63269	4.23406	2.91187	2.4408	2.84993	2.67313	2.72701	2.88726	2.48509	3.12605	3.73447	3.72816	4.02956	4.9838	4.70365	4.37901
12919715	NA	NULL	3.40531	2.66771	3.76595	2.51777	2.68446	2.32556	2.20181	3.26726	3.07736	3.23701	2.15544	3.6791	2.49955	2.50538	2.44681	2.12038
12919717	NA	NULL	4.30346	3.68015	3.83564	4.20295	3.44419	3.92991	4.15731	3.74466	3.85838	3.52212	5.03648	3.80314	2.57362	2.21672	3.83286	3.08977
12919719	NA	NULL	2.22789	2.49613	1.85656	2.24279	2.31801	2.40973	2.60773	2.72097	1.93187	3.44158	2.26533	2.06302	2.69068	2.00162	2.23983	2.61002
12919721	NA	NULL	2.72684	3.81913	2.75818	2.81832	3.09699	3.33289	4.08083	4.06127	3.16155	4.1909	2.69194	3.42051	3.6486	3.52255	4.53721	3.14477
12919723	NA	NULL	7.06205	7.42847	7.94021	7.84808	7.20709	7.10679	7.196	7.65094	7.21476	7.53458	7.50698	7.93208	8.5324	8.14876	8.25081	8.1969
12919725	NA	NULL	6.13616	6.66445	5.56219	5.57158	6.57152	6.13364	7.1153	6.63556	7.29034	6.80595	5.36707	6.82499	6.07587	5.68945	6.44465	6.94583
12919727	NA	NULL	2.47952	2.94249	2.31812	2.14531	3.59135	2.16537	3.44413	3.44427	2.52471	3.06038	2.39415	2.28044	2.32081	2.32944	2.83633	1.94523
12919729	NA	NULL	5.79463	4.71257	5.14245	4.8656	4.45092	5.14584	4.24893	4.46873	5.15628	4.47452	4.92501	4.65337	3.9769	4.02284	4.15548	4.13755
12919731	NA	NULL	4.44874	4.15505	4.16059	5.20263	3.43825	3.70234	4.2737	4.25447	3.90355	3.63904	4.50212	4.21773	3.79164	4.576	4.44349	3.85592
12919733	NA	NULL	1.97082	1.99056	1.8661	1.71869	2.17211	1.88646	2.68151	2.1158	2.68401	1.92753	1.58866	2.08201	2.2514	2.15291	2.1856	2.46598
12919735	NA	NULL	1.91489	1.93994	3.16203	2.1815	1.63147	1.98378	2.14827	1.75992	1.99442	2.26646	1.83478	2.47181	2.1723	2.07152	1.99355	2.23252
12919737	NA	NULL	1.49006	2.23034	1.9641	1.60611	1.71079	1.8143	1.91242	1.92795	1.57402	1.71375	1.87784	1.64011	1.71475	1.36753	1.51724	1.94063
12919739	NA	NULL	6.33619	5.52819	5.33021	6.01893	5.35734	6.17064	6.64705	6.18129	5.89756	5.97608	6.52984	5.56542	5.31183	5.73573	6.09195	5.84948
12919741	NA	NULL	5.22813	4.31974	3.08072	3.14217	4.00589	4.53302	5.50481	4.61412	4.37038	4.49777	3.7859	4.70643	3.23723	3.47215	4.17115	4.44619
12919743	NA	NULL	4.5668	4.59054	2.48804	2.5635	3.85453	5.21063	5.15566	4.67669	5.45569	4.62602	3.09115	3.2283	3.56507	4.71921	4.13161	3.83187
12919745	NA	NULL	3.43844	3.72989	4.18291	3.53054	3.89741	3.27357	4.01505	3.59726	2.70297	4.42379	3.12811	3.61697	4.90302	4.36066	4.49873	4.08961
12919747	NA	NULL	2.15327	2.27035	2.02682	1.96608	2.25911	1.78606	2.56245	1.9771	1.61491	1.99728	2.53705	1.98127	2.37307	2.18347	1.81867	2.40289
12919749	NA	NULL	2.52874	3.00692	2.35016	3.88535	2.92556	3.10412	2.33641	3.04231	2.39306	3.17329	2.95341	2.91097	2.16508	3.54366	2.57838	2.64915
12919751	NA	NULL	3.26944	3.38255	3.07335	2.87404	3.18014	2.6862	2.73246	3.3157	3.6285	3.56474	4.15311	2.89904	3.44669	3.56724	3.47774	4.14402
12919753	NA	NULL	4.88831	5.59431	3.70209	4.12848	6.06846	5.9351	5.97506	6.07156	5.91966	5.7792	4.25713	5.64034	5.70875	5.10654	5.76305	6.20514
12919755	NA	NULL	1.9257	2.24166	1.88674	1.87253	2.01097	2.00839	2.66928	2.08672	2.03647	1.88131	1.51069	1.77575	1.79628	1.63259	1.95523	2.09187
12919757	NA	NULL	3.16806	3.39243	4.5778	3.70725	3.56979	4.22806	4.2138	3.62564	3.90445	3.81156	3.27105	3.98751	3.35649	3.44668	3.85132	3.94705
12919759	NA	NULL	2.79521	2.76863	2.16218	3.10153	3.32519	3.36898	2.73362	3.76093	2.86593	2.91491	2.38877	2.78879	2.68213	2.69619	2.73859	3.07165
12919761	NA	NULL	3.52479	4.29342	2.49219	3.52573	2.94515	4.02335	4.86689	3.23109	4.25618	4.31956	2.66116	2.81345	3.60067	4.9042	4.02567	4.04521
12919763	NA	NULL	3.96832	4.43083	4.69973	4.29394	4.7936	4.54977	4.55524	4.78973	4.99843	5.04144	3.67393	4.02794	4.39961	4.53345	4.92465	4.88597
12919765	NA	NULL	2.46914	2.80822	2.46714	2.29158	3.13521	2.6487	2.33535	2.64787	2.5435	2.67736	2.73803	2.60866	2.74241	3.34995	3.23503	3.48858
12919767	NA	NULL	3.52998	3.85669	3.51983	2.37878	3.78288	3.58975	4.83456	3.88197	4.55506	4.16302	3.31315	3.66101	4.06625	3.18022	2.74729	4.43369
12919769	NA	NULL	4.05923	4.40926	3.05958	2.83628	3.68179	4.36412	5.82764	4.20557	5.1949	5.13913	2.62857	2.4046	3.24438	4.58083	3.55139	5.28955
12919771	NA	NULL	1.92001	1.8173	1.95662	1.78428	1.71386	1.64205	3.30197	2.11924	2.00376	1.82539	1.85339	1.57637	1.70288	1.89123	1.61203	1.6844
12919773	NA	NULL	2.06202	2.14528	2.13095	2.01166	3.03976	2.68448	2.2934	2.00452	2.48439	2.35304	1.96909	1.92706	2.37531	2.5501	2.26138	2.52355
12919775	NA	NULL	4.87233	4.56801	5.01457	3.81829	3.30653	3.64987	4.18576	4.8583	5.71887	4.68925	3.75488	4.23221	6.20654	4.46957	4.36337	5.71759
12919777	NA	NULL	2.10267	2.96406	3.13743	3.80643	2.64577	2.11057	2.56908	2.35518	3.17572	3.09	3.29929	3.01811	3.75123	3.20432	3.29787	2.78763
12919779	NA	NULL	2.08789	1.85476	1.75996	2.96695	2.07935	2.32186	2.51777	1.95987	2.01698	2.47949	2.74484	1.86833	2.1719	2.10399	1.94815	2.15875
12919781	NA	NULL	4.61147	4.74332	3.60649	4.78362	4.56072	4.88905	4.39608	4.95912	4.36414	5.02956	4.59006	5.04024	5.15105	5.16906	5.00862	5.09205
12919783	NA	NULL	4.49544	4.42531	3.77125	4.03433	3.1886	3.48587	3.63388	4.69298	4.3191	4.20789	3.0377	3.51677	4.26476	3.19742	4.09926	3.72851
12919785	NA	NULL	2.82714	3.45865	4.13072	3.47251	4.39133	3.22134	3.92729	4.32089	4.13915	3.93367	3.68653	3.45056	3.29516	3.22909	3.67205	3.6944
12919787	NA	NULL	2.59222	2.76008	3.36762	2.44987	2.29002	2.66261	2.91049	2.3835	3.04301	3.19119	3.2194	2.44467	2.54402	2.61021	2.42255	2.87581
12919789	NA	NULL	1.68752	2.33976	1.78024	1.61258	2.00688	2.04821	2.92203	2.56528	3.18848	3.26649	1.67661	1.91198	2.09924	1.83094	1.96574	1.98857
12919791	NA	NULL	3.06699	3.38243	3.6026	2.97708	3.75257	2.63374	3.76996	3.36904	4.34045	5.07703	2.76254	3.24124	3.76735	4.01432	4.00868	2.64011
12919793	NA	NULL	2.04687	2.65296	1.90078	1.97975	2.38818	1.97654	2.37583	2.22233	3.20532	3.28718	1.79332	1.86238	2.81984	2.64447	1.76342	2.131
12919795	NA	NULL	2.15508	2.45522	2.77722	2.68091	2.17949	1.8237	2.65592	2.28736	3.15494	2.58501	2.01591	2.28142	2.42734	2.15514	2.45601	3.66658
12919797	NA	NULL	2.74722	3.45822	2.86665	2.70074	2.52769	2.60836	3.37846	3.15459	3.26652	2.99086	2.71	3.27479	3.07428	3.20262	2.98588	3.17142
12919799	NA	NULL	2.79668	2.97327	3.80816	4.22021	2.87543	2.21684	2.48172	3.20856	3.49784	3.46191	2.84559	3.2268	3.97941	3.1324	3.16108	3.78542
12919801	NA	NULL	4.25727	3.91279	3.30705	4.55802	4.45548	4.82707	4.46462	4.38484	5.87501	5.75773	3.33737	4.52001	4.40264	3.57976	3.48367	3.44633
12919803	NA	NULL	3.13151	4.48202	2.83277	2.41051	3.12531	3.70278	4.6372	3.32264	5.78378	5.84657	1.97335	2.38426	4.27347	3.44437	2.65307	2.74475
12919805	NA	NULL	5.48253	5.88624	5.10233	4.66944	6.18687	6.47281	5.73075	6.22707	7.37063	7.32499	5.5236	5.60797	6.90298	6.61763	6.76581	6.59928
12919807	NA	NULL	6.18849	6.32902	5.4576	5.13218	5.62817	5.97967	5.81592	6.43033	7.80285	8.73373	5.94715	7.20095	6.65491	6.20747	7.19776	6.48107
12919809	NA	NULL	2.89356	2.63742	2.95721	2.73954	3.92282	2.95411	3.21902	3.39109	4.86783	5.40645	3.73931	2.94186	3.91932	4.26007	4.24508	3.89427
12919811	NA	NULL	4.25727	3.91279	3.30705	4.55802	4.45548	4.82707	4.46462	4.38484	5.87501	5.75773	3.33737	4.52001	4.40264	3.57976	3.48367	3.44633
12919813	NA	NULL	1.94219	2.18039	3.51999	2.26498	2.02741	2.38971	1.86186	2.15971	1.93323	2.2247	2.19313	1.78048	1.89693	2.69462	2.08655	2.68326
12919815	NA	NULL	4.03009	3.95244	3.78414	4.07071	3.39051	3.45605	3.7515	3.74182	3.34647	3.97452	3.61725	4.25957	4.48853	4.52426	4.52597	5.21681
12919817	NA	NULL	7.28616	7.43716	8.41318	8.43492	4.96566	5.30939	6.8205	6.74267	6.44196	6.76108	7.0292	8.12089	7.834	7.88489	8.00962	7.89715
12919819	NA	NULL	4.08501	4.64082	3.38003	3.70809	4.39839	3.46384	4.4133	4.22315	3.82686	4.68419	3.43536	4.21387	4.8497	3.71119	3.96905	4.6538
12919821	NA	NULL	2.36549	3.82117	1.88708	1.89256	1.73982	1.71937	2.77418	2.05346	2.85785	2.34154	1.53517	2.00636	2.7073	2.01384	2.04	2.43846
12919823	NA	NULL	2.40413	2.24737	2.3866	2.00549	2.12124	1.98691	2.13765	2.38202	2.41439	2.5525	2.27875	2.00122	2.0024	2.10902	1.66556	2.05798
12919825	NA	NULL	2.79676	2.88571	2.51741	2.06829	3.38065	2.32642	3.12544	2.65016	2.29451	3.16601	2.25307	2.73006	2.40162	2.29703	2.44022	2.51219
12919827	NA	NULL	1.89854	1.41436	2.24527	2.09121	1.48026	1.76853	1.49078	1.6411	2.44268	1.93046	1.58965	2.49955	1.74004	1.75377	1.67231	1.83721
12919829	NA	NULL	3.24021	3.77116	3.21584	2.80239	3.09379	3.4463	4.5896	4.23134	3.31525	5.11912	3.4174	3.81028	3.62901	3.36327	2.95727	2.7482
12919831	NA	NULL	3.27214	3.73671	4.45768	4.6222	3.1585	4.06782	3.97594	3.79999	2.68078	3.88744	3.72231	4.88114	3.52108	3.42579	3.97835	4.0759
12919833	NA	NULL	4.59583	5.07854	4.44631	3.16983	4.69089	4.73966	4.93365	5.21146	4.14753	5.19914	3.74552	4.3622	3.56447	4.26596	4.44565	4.69515
12919835	NA	NULL	2.8254	2.77474	2.0397	3.09323	2.21805	1.84817	2.46029	2.26758	2.89466	2.40893	3.0766	2.36811	2.14186	2.38432	2.55394	2.67619
12919837	NA	NULL	2.12136	2.07152	2.20927	2.42574	1.76583	2.15332	2.21241	2.39509	1.95792	2.04483	1.96779	2.24442	2.67465	2.32327	2.5073	2.5795
12919839	NA	NULL	3.19041	4.34515	6.58052	6.47255	3.81226	3.72773	3.69035	4.29872	3.50623	3.02579	4.42605	5.60408	5.91816	6.54129	6.27928	6.12121
12919841	NA	NULL	4.16194	3.03703	4.44308	3.89432	3.28866	4.27562	4.71484	3.35861	3.85904	4.31584	3.46508	4.68625	3.25025	3.69247	4.36085	4.20578
12919843	NA	NULL	2.23186	2.36622	3.3692	2.28064	1.86382	1.95982	2.13036	1.83224	1.99555	2.50759	2.42409	2.01741	2.22279	1.93452	2.34721	3.15827
12919845	NA	NULL	2.07731	1.70749	1.99095	1.85498	2.49547	2.37217	2.12823	2.15282	1.9245	2.12364	2.41917	2.4573	1.74201	1.92778	1.92465	2.37357
12919847	NA	NULL	1.53386	2.3419	1.9734	1.62136	2.04103	1.77196	1.64832	2.00675	2.07314	1.76869	1.66161	1.55375	1.93391	2.21951	2.16124	2.86802
12919849	NA	NULL	1.88612	1.77882	1.79657	1.71763	1.85626	1.82468	1.8278	2.19764	1.63383	1.83992	1.8239	1.78441	2.02442	1.86359	1.62523	1.66299
12919851	NA	NULL	2.17419	1.9261	1.91903	1.89	2.58617	2.21951	2.57057	2.46016	1.91524	2.17743	2.13479	1.7805	2.56748	1.8722	1.95069	2.04656
12919853	NA	NULL	2.30339	3.5703	2.17039	3.07765	2.13912	2.66937	2.94239	2.90669	2.4351	3.11904	2.46419	3.02627	2.38972	2.31649	2.80231	2.55514
12919855	NA	NULL	3.02794	3.66815	2.76498	3.16495	3.06359	4.04564	3.01808	3.33637	2.03891	3.17449	3.20675	3.32212	3.16596	3.87487	3.55242	3.23796
12919857	NA	NULL	1.68957	1.4749	2.21017	1.69956	1.75424	2.05675	1.57622	1.75416	1.82624	1.82608	2.25162	1.93972	1.56822	2.03295	1.76831	1.66367
12919859	NA	NULL	2.50391	2.77778	2.16692	2.55847	2.16471	2.29121	3.19599	2.97056	2.26654	3.05535	2.20452	3.46328	3.04619	3.02822	2.92938	3.00205
12919861	NA	NULL	3.04513	2.98423	2.82699	3.51807	3.90774	3.33422	4.01516	3.70866	1.70698	3.35576	2.71824	3.22161	4.03374	3.99875	3.68408	3.58506
12919863	NA	NULL	1.97558	1.87915	2.0026	2.26383	1.60571	2.14744	1.88479	2.08627	1.67282	2.24084	2.35608	1.8797	1.46721	2.04791	1.90215	2.40019
12919865	NA	NULL	3.7129	3.515	3.45834	3.49909	2.95308	3.01862	3.31506	3.30439	3.04949	3.16772	3.36183	3.83621	4.28292	4.06078	3.92223	3.93815
12919867	NA	NULL	7.28616	7.43716	8.41318	8.43492	4.96566	5.30939	6.8205	6.74267	6.44196	6.76108	7.0292	8.12089	7.834	7.88489	8.00962	7.89715
12919869	NA	NULL	4.08501	4.64082	3.38003	3.70809	4.39839	3.46384	4.4133	4.22315	3.82686	4.68419	3.43536	4.21387	4.8497	3.71119	3.96905	4.6538
12919871	NA	NULL	2.36549	3.82117	1.88708	1.89256	1.73982	1.71937	2.77418	2.05346	2.85785	2.34154	1.53517	2.00636	2.7073	2.01384	2.04	2.43846
12919873	NA	NULL	2.40413	2.24737	2.3866	2.00549	2.12124	1.98691	2.13765	2.38202	2.41439	2.5525	2.27875	2.00122	2.0024	2.10902	1.66556	2.05798
12919875	NA	NULL	2.79676	2.88571	2.51741	2.06829	3.38065	2.32642	3.12544	2.65016	2.29451	3.16601	2.25307	2.73006	2.40162	2.29703	2.44022	2.51219
12919877	NA	NULL	1.89854	1.41436	2.24527	2.09121	1.48026	1.76853	1.49078	1.6411	2.44268	1.93046	1.58965	2.49955	1.74004	1.75377	1.67231	1.83721
12919879	NA	NULL	3.24021	3.77116	3.21584	2.80239	3.09379	3.4463	4.5896	4.23134	3.31525	5.11912	3.4174	3.81028	3.62901	3.36327	2.95727	2.7482
12919881	NA	NULL	3.27214	3.73671	4.45768	4.6222	3.1585	4.06782	3.97594	3.79999	2.68078	3.88744	3.72231	4.88114	3.52108	3.42579	3.97835	4.0759
12919883	NA	NULL	4.59583	5.07854	4.44631	3.16983	4.69089	4.73966	4.93365	5.21146	4.14753	5.19914	3.74552	4.3622	3.56447	4.26596	4.44565	4.69515
12919885	NA	NULL	2.8254	2.77474	2.0397	3.09323	2.21805	1.84817	2.46029	2.26758	2.89466	2.40893	3.0766	2.36811	2.14186	2.38432	2.55394	2.67619
12919887	NA	NULL	2.12136	2.07152	2.20927	2.42574	1.76583	2.15332	2.21241	2.39509	1.95792	2.04483	1.96779	2.24442	2.67465	2.32327	2.5073	2.5795
12919889	NA	NULL	3.19041	4.34515	6.58052	6.47255	3.81226	3.72773	3.69035	4.29872	3.50623	3.02579	4.42605	5.60408	5.91816	6.54129	6.27928	6.12121
12919891	NA	NULL	4.16194	3.03703	4.44308	3.89432	3.28866	4.27562	4.71484	3.35861	3.85904	4.31584	3.46508	4.68625	3.25025	3.69247	4.36085	4.20578
12919893	NA	NULL	2.23186	2.36622	3.3692	2.28064	1.86382	1.95982	2.13036	1.83224	1.99555	2.50759	2.42409	2.01741	2.22279	1.93452	2.34721	3.15827
12919895	NA	NULL	2.07731	1.70749	1.99095	1.85498	2.49547	2.37217	2.12823	2.15282	1.9245	2.12364	2.41917	2.4573	1.74201	1.92778	1.92465	2.37357
12919897	NA	NULL	1.53386	2.3419	1.9734	1.62136	2.04103	1.77196	1.64832	2.00675	2.07314	1.76869	1.66161	1.55375	1.93391	2.21951	2.16124	2.86802
12919899	NA	NULL	1.88612	1.77882	1.79657	1.71763	1.85626	1.82468	1.8278	2.19764	1.63383	1.83992	1.8239	1.78441	2.02442	1.86359	1.62523	1.66299
12919901	NA	NULL	2.17419	1.9261	1.91903	1.89	2.58617	2.21951	2.57057	2.46016	1.91524	2.17743	2.13479	1.7805	2.56748	1.8722	1.95069	2.04656
12919903	NA	NULL	2.30339	3.5703	2.17039	3.07765	2.13912	2.66937	2.94239	2.90669	2.4351	3.11904	2.46419	3.02627	2.38972	2.31649	2.80231	2.55514
12919905	NA	NULL	3.02794	3.66815	2.76498	3.16495	3.06359	4.04564	3.01808	3.33637	2.03891	3.17449	3.20675	3.32212	3.16596	3.87487	3.55242	3.23796
12919907	NA	NULL	1.68957	1.4749	2.21017	1.69956	1.75424	2.05675	1.57622	1.75416	1.82624	1.82608	2.25162	1.93972	1.56822	2.03295	1.76831	1.66367
12919909	NA	NULL	2.50391	2.77778	2.16692	2.55847	2.16471	2.29121	3.19599	2.97056	2.26654	3.05535	2.20452	3.46328	3.04619	3.02822	2.92938	3.00205
12919911	NA	NULL	3.04513	2.98423	2.82699	3.51807	3.90774	3.33422	4.01516	3.70866	1.70698	3.35576	2.71824	3.22161	4.03374	3.99875	3.68408	3.58506
12919913	NA	NULL	3.52479	4.29342	2.49219	3.52573	2.94515	4.02335	4.86689	3.23109	4.25618	4.31956	2.66116	2.81345	3.60067	4.9042	4.02567	4.04521
12919915	NA	NULL	3.96832	4.43083	4.69973	4.29394	4.7936	4.54977	4.55524	4.78973	4.99843	5.04144	3.67393	4.02794	4.39961	4.53345	4.92465	4.88597
12919917	NA	NULL	2.46914	2.80822	2.46714	2.29158	3.13521	2.6487	2.33535	2.64787	2.5435	2.67736	2.73803	2.60866	2.74241	3.34995	3.23503	3.48858
12919919	NA	NULL	3.52998	3.85669	3.51983	2.37878	3.78288	3.58975	4.83456	3.88197	4.55506	4.16302	3.31315	3.66101	4.06625	3.18022	2.74729	4.43369
12919921	NA	NULL	4.05923	4.40926	3.05958	2.83628	3.68179	4.36412	5.82764	4.20557	5.1949	5.13913	2.62857	2.4046	3.24438	4.58083	3.55139	5.28955
12919923	NA	NULL	1.92001	1.8173	1.95662	1.78428	1.71386	1.64205	3.30197	2.11924	2.00376	1.82539	1.85339	1.57637	1.70288	1.89123	1.61203	1.6844
12919925	NA	NULL	2.06202	2.14528	2.13095	2.01166	3.03976	2.68448	2.2934	2.00452	2.48439	2.35304	1.96909	1.92706	2.37531	2.5501	2.26138	2.52355
12919927	NA	NULL	4.87233	4.56801	5.01457	3.81829	3.30653	3.64987	4.18576	4.8583	5.71887	4.68925	3.75488	4.23221	6.20654	4.46957	4.36337	5.71759
12919929	NA	NULL	2.10267	2.96406	3.13743	3.80643	2.64577	2.11057	2.56908	2.35518	3.17572	3.09	3.29929	3.01811	3.75123	3.20432	3.29787	2.78763
12919931	NA	NULL	2.08789	1.85476	1.75996	2.96695	2.07935	2.32186	2.51777	1.95987	2.01698	2.47949	2.74484	1.86833	2.1719	2.10399	1.94815	2.15875
12919933	NA	NULL	4.61147	4.74332	3.60649	4.78362	4.56072	4.88905	4.39608	4.95912	4.36414	5.02956	4.59006	5.04024	5.15105	5.16906	5.00862	5.09205
12919935	NA	NULL	4.49544	4.42531	3.77125	4.03433	3.1886	3.48587	3.63388	4.69298	4.3191	4.20789	3.0377	3.51677	4.26476	3.19742	4.09926	3.72851
12919937	NA	NULL	2.82714	3.45865	4.13072	3.47251	4.39133	3.22134	3.92729	4.32089	4.13915	3.93367	3.68653	3.45056	3.29516	3.22909	3.67205	3.6944
12919939	NA	NULL	2.59222	2.76008	3.36762	2.44987	2.29002	2.66261	2.91049	2.3835	3.04301	3.19119	3.2194	2.44467	2.54402	2.61021	2.42255	2.87581
12919941	NA	NULL	1.68752	2.33976	1.78024	1.61258	2.00688	2.04821	2.92203	2.56528	3.18848	3.26649	1.67661	1.91198	2.09924	1.83094	1.96574	1.98857
12919943	NA	NULL	3.06699	3.38243	3.6026	2.97708	3.75257	2.63374	3.76996	3.36904	4.34045	5.07703	2.76254	3.24124	3.76735	4.01432	4.00868	2.64011
12919945	NA	NULL	2.04687	2.65296	1.90078	1.97975	2.38818	1.97654	2.37583	2.22233	3.20532	3.28718	1.79332	1.86238	2.81984	2.64447	1.76342	2.131
12919947	NA	NULL	2.15508	2.45522	2.77722	2.68091	2.17949	1.8237	2.65592	2.28736	3.15494	2.58501	2.01591	2.28142	2.42734	2.15514	2.45601	3.66658
12919949	NA	NULL	2.74722	3.45822	2.86665	2.70074	2.52769	2.60836	3.37846	3.15459	3.26652	2.99086	2.71	3.27479	3.07428	3.20262	2.98588	3.17142
12919951	NA	NULL	2.79668	2.97327	3.80816	4.22021	2.87543	2.21684	2.48172	3.20856	3.49784	3.46191	2.84559	3.2268	3.97941	3.1324	3.16108	3.78542
12919953	NA	NULL	4.25727	3.91279	3.30705	4.55802	4.45548	4.82707	4.46462	4.38484	5.87501	5.75773	3.33737	4.52001	4.40264	3.57976	3.48367	3.44633
12919955	NA	NULL	3.13151	4.48202	2.83277	2.41051	3.12531	3.70278	4.6372	3.32264	5.78378	5.84657	1.97335	2.38426	4.27347	3.44437	2.65307	2.74475
12919957	NA	NULL	5.48253	5.88624	5.10233	4.66944	6.18687	6.47281	5.73075	6.22707	7.37063	7.32499	5.5236	5.60797	6.90298	6.61763	6.76581	6.59928
12919959	NA	NULL	6.18849	6.32902	5.4576	5.13218	5.62817	5.97967	5.81592	6.43033	7.80285	8.73373	5.94715	7.20095	6.65491	6.20747	7.19776	6.48107
12919961	NA	NULL	2.89356	2.63742	2.95721	2.73954	3.92282	2.95411	3.21902	3.39109	4.86783	5.40645	3.73931	2.94186	3.91932	4.26007	4.24508	3.89427
12919963	NA	NULL	4.25727	3.91279	3.30705	4.55802	4.45548	4.82707	4.46462	4.38484	5.87501	5.75773	3.33737	4.52001	4.40264	3.57976	3.48367	3.44633
12919965	NA	NULL	4.57413	4.50925	5.10263	5.48092	4.78168	5.18559	4.80337	5.17975	3.79589	4.77928	4.4264	5.08635	6.9549	6.97926	7.14989	6.72247
12919967	NA	NULL	4.58232	3.84259	4.33007	3.86804	4.99388	4.47228	4.66863	5.0265	3.91647	4.47615	4.31454	2.96635	2.98129	2.69313	3.15825	2.66641
12919969	NA	NULL	1.76079	1.42801	1.79456	1.77188	1.89769	1.85458	1.97637	1.72277	1.76797	1.59211	2.16434	1.74657	2.07143	2.78359	2.75662	2.86719
12919971	NA	NULL	2.17166	2.65869	2.64356	2.44325	2.06161	2.03001	2.31058	2.33486	2.11401	2.07698	2.47499	2.19776	3.29245	2.27108	2.27831	2.67004
12919973	NA	NULL	3.25254	4.43347	4.91494	5.43224	3.38899	4.26569	3.22024	4.16414	2.9335	4.45498	2.91393	3.87921	4.52243	4.72173	4.67249	5.36626
12919975	NA	NULL	3.13646	3.49804	3.01542	3.93065	2.98913	3.74693	3.33892	3.84609	3.232	3.64885	4.30452	3.35236	2.66564	2.97553	2.94441	3.2143
12919977	NA	NULL	1.58736	1.52525	1.65299	2.00886	2.10131	2.1897	1.68875	1.72266	1.69893	1.38953	2.13475	3.56848	1.84058	2.26863	1.81938	1.75329
12919979	NA	NULL	3.92985	2.64417	3.95265	5.2198	2.40391	3.16783	4.73823	2.87468	3.75625	3.17071	6.36137	3.64596	2.60024	3.72076	3.47342	3.17632
12919981	NA	NULL	1.87257	1.85954	2.15426	1.90592	1.9139	1.8837	1.92743	2.23597	1.51983	2.22747	1.59878	2.37963	2.73118	2.67474	2.93642	2.50579
12919983	NA	NULL	1.70937	2.24374	3.11773	2.24048	2.06101	2.42156	2.06043	2.06669	1.98627	2.33907	1.86903	1.95632	2.08367	1.86543	1.81737	2.53862
12919985	NA	NULL	1.83568	2.04659	2.01598	1.84527	1.74195	1.75726	2.07506	1.92161	1.67272	1.7777	1.71308	1.67334	1.9846	1.88222	2.38382	2.24884
12919987	NA	NULL	2.15224	1.69761	3.13771	2.01558	2.00902	1.96134	2.02992	2.26964	1.92333	2.05381	2.01788	2.06558	2.05374	3.39034	2.19767	2.62555
12919989	NA	NULL	1.80547	1.81595	1.88955	2.59602	1.71391	2.40152	2.16519	3.01048	1.91503	1.62105	2.51646	2.18233	3.0936	2.29027	2.48501	2.71647
12919991	NA	NULL	2.40854	3.80621	5.45862	3.95195	2.85549	2.05011	3.85165	3.25085	3.37674	2.79308	3.60613	4.48769	5.56642	5.17469	4.81802	4.79997
12919993	NA	NULL	2.66417	2.76491	3.53881	4.02442	2.43869	2.25399	4.12048	2.57411	3.36423	3.25481	2.92028	3.07565	2.47683	3.03611	2.97748	3.45028
12919995	NA	NULL	3.76671	4.07851	3.78054	3.72777	3.22172	2.85518	3.72564	3.46482	3.04483	3.31374	3.45337	3.37675	5.84447	5.60477	4.9941	5.90818
12919997	NA	NULL	2.26727	2.4553	1.9472	2.24439	2.03637	2.03834	2.04401	2.18453	2.12789	2.21642	1.8987	1.831	1.89771	2.57797	2.19975	2.83907
[truncated: 73,213 more rows]

## Sheet: MO-WT
PROBEID	ID	SYMBOL	GENENAME	logFC	AveExpr	t	P.Value	adj.P.Val	B	ENTREZID			Differentially expressed genes :: LEPA morpholino knockdown compared to control
13042811	ENSDART00000122642	CABZ01080435.1	---	4.0605	7.28701	14.4107	1.24304e-10	1.2359e-06	14.2957	NA
13035421	XM_003200280	LOC100537029	immunoglobulin superfamily DCC subclass member 3-like	3.81831	7.25685	14.875	7.70995e-11	1.2359e-06	14.7087	100537029
13070662	XM_001339896	LOC799595	immunoglobulin superfamily DCC subclass member 3-like	3.27617	5.58348	14.0205	1.87632e-10	1.2359e-06	13.9362	NA
13133579	CU458945	igsf21b	immunoglobin superfamily, member 21b	-2.2581	6.3377	-14.0097	1.89803e-10	1.2359e-06	13.9261	567714
13026926	XM_001919922	LOC557824	heat shock protein 105 kDa-like	1.8908	5.19198	13.3987	3.69227e-10	1.92338e-06	13.3387	NA
13032656	XM_001919887	nes	nestin	2.45574	7.39903	13.1202	5.04327e-10	2.18928e-06	13.0608	100150939
13196441	AF006488	dlb	deltaB	1.80886	7.61735	12.935	6.22489e-10	2.31619e-06	12.8723	30141
13072722	XM_003200534	pou2f2a	POU domain, class 2, transcription factor 2a	1.60189	6.84573	12.6866	8.28773e-10	2.69828e-06	12.6149	557055
13282194	BC065636	insm1a	insulinoma-associated 1a	1.76733	8.21791	12.384	1.18219e-09	3.42125e-06	12.2937	402941
13107480	ENSDART00000046633	notch1a	notch homolog 1a	2.04673	6.58743	12.2493	1.38774e-09	3.61451e-06	12.148	30718
13022587	BC080258	sagb	S-antigen; retina and pineal gland (arrestin) b	-2.24925	6.01561	-12.0641	1.73417e-09	4.1062e-06	11.945	619268
13206106	BC151913	si:dkey-204l11.1	si:dkey-204l11.1	2.44613	5.97065	11.812	2.35939e-09	4.72713e-06	11.6633	100006301
12995095	XM_001921194	ttc7a	tetratricopeptide repeat domain 7A	-1.1399	4.99231	-11.8222	2.3299e-09	4.72713e-06	11.6748	559345
12948881	XM_003197688	LOC100537727	sterile alpha motif domain-containing protein 9-like	1.92048	3.80182	11.6825	2.76923e-09	5.15196e-06	11.5162	NA
12988871	BC134193	gngt2b	guanine nucleotide binding protein (G protein), gamma transducing activity polypeptide 2b	-4.75024	7.83416	-11.6236	2.98023e-09	5.17487e-06	11.4487	797361
13176435	BC076184	gng13b	guanine nucleotide binding protein (G protein), gamma 13b	-1.85747	8.5216	-11.4828	3.55545e-09	5.78783e-06	11.286	436673
13001213	BC129159	dld	deltaD	1.64831	7.08643	11.329	4.3202e-09	6.61906e-06	11.106	30138
13281884	BC045359	dnajb1b	DnaJ (Hsp40) homolog, subfamily B, member 1b	1.81376	6.00762	11.2461	4.80257e-09	6.94932e-06	11.008	327244
12977148	BC056826	iars	isoleucyl-tRNA synthetase	2.08635	7.4879	11.0548	6.1462e-09	8.42547e-06	10.779	334393
13281412	ENSDART00000103422	CTBP2	C-terminal binding protein 2	-1.63952	5.44748	-10.9759	6.81113e-09	8.77851e-06	10.6834	NA
13305218	AF109369	opn1mw1	opsin 1 (cone pigments), medium-wave-sensitive, 1	-6.1018	8.75447	-10.9465	7.07782e-09	8.77851e-06	10.6476	30503
13072517	BC059436	gnb3b	guanine nucleotide binding protein (G protein), beta polypeptide 3b	-3.928	6.67556	-10.836	8.18275e-09	9.68764e-06	10.5123	406483
13300578	XM_685344	LOC561947	uncharacterized LOC561947	1.84652	6.58279	10.7285	9.43426e-09	9.82899e-06	10.3793	NA
13113462	XM_003200816	LOC100329434	neurogenic locus notch homolog protein 1-like	1.59636	8.32718	10.7815	8.7939e-09	9.82899e-06	10.4451	NA
13168461	XM_691875	LOC568543	carbonic anhydrase-related protein 10-like	-1.34136	5.5785	-10.74	9.29063e-09	9.82899e-06	10.3937	NA
13202995	AF198446	foxn4	forkhead box N4	2.18857	6.69381	10.677	1.01029e-08	1.01207e-05	10.3153	30315
12950881	DQ993185	dla	deltaA	2.05801	7.2067	10.5733	1.16073e-08	1.02835e-05	10.1852	30131
13188658	XM_003198278	LOC100536392	cadherin-related family member 5-like	-2.02991	4.90696	-10.5583	1.18447e-08	1.02835e-05	10.1663	NA
13089085	BC095139	tmx3	thioredoxin-related transmembrane protein 3	-2.25409	5.25091	-10.6038	1.11427e-08	1.02835e-05	10.2235	553578
13281206	XM_681264	si:ch211-88n13.3	si:ch211-88n13.3	-2.31863	5.29322	-10.5852	1.14229e-08	1.02835e-05	10.2003	NA
12994658	BC059645	prph2b	peripherin 2b (retinal degeneration, slow)	-4.08143	7.11946	-10.501	1.27946e-08	1.07499e-05	10.0939	559209
13030355	BC076127	gnb3a	guanine nucleotide binding protein (G protein), beta polypeptide 3a	-2.24428	7.02181	-10.4383	1.39278e-08	1.13363e-05	10.0142	436710
13287994	ENSDART00000033848	brf1a	BRF1 homolog, subunit of RNA polymerase III transcription initiation factor IIIBa	2.03482	6.48085	10.3891	1.48924e-08	1.1664e-05	9.95121	334402
13210728	ENSDART00000053183	tab1	TGF-beta activated kinase 1/MAP3K7 binding protein 1	1.35763	7.3862	10.3728	1.5226e-08	1.1664e-05	9.93037	403084
12974754	BC076120	opn1lw2	opsin 1 (cone pigments), long-wave-sensitive, 2	-4.04306	6.89952	-10.3488	1.57321e-08	1.17074e-05	9.8996	436716
13287582	XM_003200660	LOC569340	uncharacterized LOC569340	-2.80272	5.64194	-10.3	1.68181e-08	1.21679e-05	9.83676	569340
13218424	XM_002662297	LOC100331226	MAGUK p55 subfamily member 4-like	-1.8585	5.09984	-10.2354	1.83804e-08	1.29388e-05	9.75304	NA
13015196	U94588	neurog1	neurogenin 1	1.91967	6.99362	10.169	2.01443e-08	1.38074e-05	9.6666	30239
13061462	XM_682552	LOC559232	regulator of G-protein signaling 9-binding protein-like	-2.30088	5.94998	-10.1005	2.21524e-08	1.47944e-05	9.57686	NA
13161457	XM_001920557	cacna2d4b	calcium channel, voltage-dependent, alpha 2/delta subunit 4b	-1.85537	5.22793	-9.93372	2.79744e-08	1.82155e-05	9.35608	100150428
13030428	XM_693882	LOC570404	uncharacterized LOC570404	3.75408	5.83764	9.86029	3.103e-08	1.97124e-05	9.25782	NA
13024874	XM_686299	LOC562934	endothelial cell-selective adhesion molecule-like	-1.23679	6.03994	-9.81269	3.31968e-08	2.0108e-05	9.19377	NA
12963516	BC076177	arr3a	arrestin 3a, retinal (X-arrestin)	-3.38027	8.29109	-9.82545	3.26006e-08	2.0108e-05	9.21097	436678
13227847	NM_001173501	nelfa	negative elongation factor complex member A	2.25791	7.02853	9.78917	3.43258e-08	2.03193e-05	9.16203	559677
12991181	AY329628	hbbe3	hemoglobin beta embryonic-3	2.8468	5.35759	9.69925	3.90283e-08	2.25896e-05	9.04004	30596
13164142	BC060940	zgc:73359	zgc:73359	-3.65251	9.10278	-9.64948	4.19186e-08	2.3735e-05	8.97209	393810
12957865	AB331773	cxcl-c1c	chemokine (C-X-C motif) ligand C1c	2.14695	5.72483	9.56815	4.71359e-08	2.51423e-05	8.8604	NA
13038908	BC117615	arhgef1b	Rho guanine nucleotide exchange factor (GEF) 1b	1.68727	7.68931	9.58456	4.60309e-08	2.51423e-05	8.883	557983
13258384	BC049476	si:ch1073-303l5.1	si:ch1073-303l5.1	1.40302	6.07412	9.5518	4.82653e-08	2.51423e-05	8.83784	NA
13068094	BC044433	lin28a	lin-28 homolog A (C. elegans)	1.19152	5.41077	9.55474	4.80602e-08	2.51423e-05	8.8419	394066
12966281	BC047826	zgc:56085	zgc:56085	-3.52405	7.04144	-9.51153	5.11689e-08	2.61323e-05	8.78216	NA
12962220	XM_001919240	LOC796392	RING finger protein 208-like	-1.0187	7.07168	-9.43303	5.73709e-08	2.85323e-05	8.67301	NA
13146494	BC142843	lppr5b	lipid phosphate phosphatase-related protein type 5b	-1.37119	6.17117	-9.42106	5.8384e-08	2.85323e-05	8.65631	NA
13037099	BC059485	rcv1	recoverin	-3.46256	7.99965	-9.4121	5.91547e-08	2.85323e-05	8.64378	NA
12989212	BC063318	pde6c	phosphodiesterase 6C, cGMP-specific, cone, alpha prime	-3.26746	6.58597	-9.33913	6.58429e-08	3.11808e-05	8.54145	393845
13242823	BC168513	gcn1l1	GCN1 general control of amino-acid synthesis 1-like 1 (yeast)	1.34837	7.77592	9.32513	6.72147e-08	3.1262e-05	8.52174	NA
13218387	XM_695055	LOC571463	lipid phosphate phosphatase-related protein type 5-like	-1.02414	6.04565	-9.26557	7.33957e-08	3.13388e-05	8.4376	NA
13026617	BC128801	samsn1a	SAM domain, SH3 domain and nuclear localisation signals, 1a	-1.51298	5.07759	-9.27038	7.28748e-08	3.13388e-05	8.44441	336695
13003826	AY684930	cdhr1a	cadherin-related family member 1a	-1.78359	4.70399	-9.28519	7.1296e-08	3.13388e-05	8.46537	449008
13006912	XM_002664241	LOC100331665	phenylserine dehydratase-like	-1.83094	5.82302	-9.27125	7.27808e-08	3.13388e-05	8.44565	100331665
13059822	BC059544	gnb5b	guanine nucleotide binding protein (G protein), beta 5b	-2.02755	7.16219	-9.2719	7.27108e-08	3.13388e-05	8.44657	393719
12989016	XM_001920910	si:ch211-180a12.2	si:ch211-180a12.2	-1.48229	5.20702	-9.24344	7.58409e-08	3.18605e-05	8.40624	100150385
13161587	EU559281	atp2b1b	ATPase, Ca++ transporting, plasma membrane 1b	-1.91975	5.60785	-9.20416	8.03969e-08	3.32384e-05	8.35038	561190
13287310	BC056709	hsp70	heat shock cognate 70-kd protein	2.14751	8.49246	9.15798	8.61226e-08	3.50492e-05	8.28448	NA
13056126	XM_686862	LOC563500	anoctamin-1-like	-1.53279	6.19951	-9.13603	8.8993e-08	3.51235e-05	8.25305	563500
12973627	HM138700	slc1a8a	solute carrier family 1 (glutamate transporter), member 8a	-2.11455	5.1724	-9.13596	8.90023e-08	3.51235e-05	8.25295	570702
13256910	HM367063	rho	rhodopsin	-4.23725	8.28752	-9.11883	9.13131e-08	3.54976e-05	8.22838	30295
13148215	ENSDART00000108598	CABZ01044085.1	---	1.23876	6.47266	9.10304	9.34978e-08	3.58124e-05	8.20571	NA
13107726	NM_001037574	zgc:122979	zgc:122979	-1.23866	6.43153	-9.07973	9.68252e-08	3.60273e-05	8.17217	641576
13187576	AF109373	opn1sw1	opsin 1 (cone pigments), short-wave-sensitive 1	-5.19865	8.99628	-9.087	9.57749e-08	3.60273e-05	8.18263	30582
13153724	ENSDART00000059193	PRTGB	---	1.63893	6.21659	9.0414	1.02571e-07	3.76275e-05	8.11685	NA
13150044	XM_001342808	im:7137453	im:7137453	1.22319	6.83137	8.99868	1.09396e-07	3.9574e-05	8.055	NA
13129462	XM_002666332	LOC100330593	uncharacterized LOC100330593	-2.02008	5.80766	-8.89746	1.27547e-07	4.55082e-05	7.90746	NA
12992845	BC081641	prph2a	peripherin 2a (retinal degeneration, slow)	-2.79042	5.98479	-8.88097	1.30791e-07	4.6035e-05	7.88331	58085
13063164	NM_001044310	aars	alanyl-tRNA synthetase	1.75549	8.44365	8.84419	1.38347e-07	4.69942e-05	7.82927	324940
13286238	XM_001339701	LOC799373	GTP-binding protein 2-like	1.31017	7.67761	8.85565	1.35944e-07	4.69942e-05	7.84613	NA
12993511	AF072547	pax2b	paired box gene 2b	1.11643	7.37341	8.84144	1.38929e-07	4.69942e-05	7.82523	60638
12987404	BC124167	azi1	5-azacytidine induced gene 1	1.81699	6.20302	8.78473	1.51542e-07	5.0467e-05	7.74156	NA
13215263	XM_002662494	LOC566922	gamma-aminobutyric acid receptor subunit beta-3-like	-2.15649	6.74105	-8.77819	1.53071e-07	5.0467e-05	7.73189	NA
13165453	NM_001098755	slc17a7	solute carrier family 17 (sodium-dependent inorganic phosphate cotransporter), member 7	-1.45014	5.21953	-8.75196	1.59373e-07	5.17243e-05	7.69302	NA
13282722	AY763408	kctd12b	potassium channel tetramerisation domain containing 12b	-1.72265	5.25073	-8.74595	1.60856e-07	5.17243e-05	7.6841	550324
13059754	AY835393	onecut1	one cut domain, family member 1	1.4327	7.7579	8.69377	1.74348e-07	5.45938e-05	7.60646	393545
13200948	AY099535	ddx54	DEAD (Asp-Glu-Ala-Asp) box polypeptide 54	0.915728	6.15963	8.68501	1.76726e-07	5.45938e-05	7.5934	286777
13284658	XM_001920252	myo3b	myosin IIIB	-1.2141	5.89591	-8.67977	1.78164e-07	5.45938e-05	7.58558	564573
12974740	AF109372	opn1sw2	opsin 1 (cone pigments), short-wave-sensitive 2	-3.28096	7.36538	-8.69696	1.73488e-07	5.45938e-05	7.61123	30435
12999785	XM_001334934	LOC794903	collagen alpha-4(VI) chain-like	-2.11421	5.54997	-8.66797	1.8145e-07	5.49541e-05	7.56795	NA
12988449	CU638773	lrit1b	leucine-rich repeat, immunoglobulin-like and transmembrane domains 1b	-1.98597	5.84429	-8.64096	1.89214e-07	5.66469e-05	7.52753	553432
13201522	XR_084472	LOC100149028	tenascin-like	-1.12125	6.20274	-8.62518	1.93911e-07	5.73932e-05	7.50387	NA
13279490	HM138699	slc1a7b	solute carrier family 1 (glutamate transporter), member 7b	-1.0779	5.9799	-8.60624	1.9971e-07	5.84455e-05	7.47542	100463517
13217794	BC059633	pde6h	phosphodiesterase 6H, cGMP-specific, cone, gamma	-3.48453	7.63134	-8.59392	2.03581e-07	5.89164e-05	7.45689	393758
13206524	NM_131866	gc3	guanylyl cyclase 3	-1.82589	5.50524	-8.57705	2.09008e-07	5.98222e-05	7.43148	140426
13036154	XM_685160	trim71	tripartite motif-containing 71	1.04638	7.46288	8.54423	2.20007e-07	6.20822e-05	7.38195	561754
13283128	BC122296	zgc:153443	zgc:153443	-1.66187	6.1888	-8.53941	2.21671e-07	6.20822e-05	7.37466	NA
13082125	DQ372944	cacnb2b	calcium channel, voltage-dependent, beta 2b	-1.46408	6.60615	-8.51536	2.30181e-07	6.37798e-05	7.33826	558806
13002811	XM_002664175	LOC100330303	visceral mesodermal armadillo-repeats-like	-1.16068	5.185	-8.4895	2.39718e-07	6.50384e-05	7.29902	100330303
13053855	XM_002665219	LOC100331800	photoreceptor outer segment membrane glycoprotein 2-like	-1.79569	5.77153	-8.49577	2.37369e-07	6.50384e-05	7.30854	NA
13254375	BC146736	ralgps1	Ral GEF with PH domain and SH3 binding motif 1	-1.1947	6.07548	-8.46931	2.4745e-07	6.64442e-05	7.26832	100101642
13047615	DQ164185	insm1b	insulinoma-associated 1b	1.46487	8.02634	8.46055	2.50887e-07	6.66795e-05	7.25499	323882
13284936	BC057414	srfb	serum response factor b	1.14155	8.02009	8.45205	2.54267e-07	6.68953e-05	7.24204	393604
13276946	BC129366	pank2	pantothenate kinase 2	-1.33814	7.11855	-8.44109	2.58698e-07	6.73804e-05	7.22533	570866
12976687	BC127586	zgc:158340	zgc:158340	-1.82241	6.63277	-8.41241	2.70682e-07	6.98037e-05	7.18152	NA
13107804	XM_002665873	wu:fj64h06	wu:fj64h06	1.80645	7.03647	8.35854	2.94791e-07	7.4545e-05	7.09893	336342
12954959	AF373869	prom1b	prominin 1 b	-2.09942	6.58933	-8.36468	2.91934e-07	7.4545e-05	7.10836	378834
12999527	EF043381	opn3	opsin 3	-1.05876	5.33342	-8.33092	3.08018e-07	7.71407e-05	7.05642	561815
12951141	AY337025	mb	myoglobin	-1.54827	6.94403	-8.29985	3.2364e-07	8.02812e-05	7.00849	393558
13028722	ENSDART00000029313	cdkal1	CDK5 regulatory subunit associated protein 1-like 1	1.09541	6.36634	8.28708	3.30301e-07	8.11606e-05	6.98874	393600
13234705	BC131871	mex3b	mex-3 homolog B (C. elegans)	1.10869	8.51702	8.26615	3.41532e-07	8.31359e-05	6.95633	569582
13175508	XM_003198116	LOC100534734	uncharacterized LOC100534734	0.954544	3.23674	8.25776	3.46145e-07	8.34786e-05	6.94333	NA
13161539	XM_001922980	wu:fb39e10	wu:fb39e10	1.19486	7.88237	8.2422	3.54874e-07	8.45209e-05	6.91918	561841
12980324	BC100052	igsf21a	immunoglobin superfamily, member 21a	-1.29836	7.00645	-8.23855	3.56957e-07	8.45209e-05	6.91351	569872
12959927	BC053125	minal	MYC induced nuclear antigen-like	1.25321	7.21055	8.21667	3.697e-07	8.63229e-05	6.87949	393308
12979943	NR_030507	mir726	microRNA 726	-2.34274	4.52148	-8.21127	3.72922e-07	8.63229e-05	6.87107	100033737
13108277	GU174499	cplx4a	complexin 4a	-2.92956	4.89435	-8.20862	3.7451e-07	8.63229e-05	6.86695	768157
13048809	BC090272	dph6	DPH6 homolog (S. cerevisiae)	1.04325	5.24039	8.19358	3.8367e-07	8.72884e-05	6.84351	503603
12957005	CU468794	lrrtm1	leucine rich repeat transmembrane neuronal 1	-0.950392	7.19137	-8.19078	3.85402e-07	8.72884e-05	6.83914	570385
13255887	BC122268	hes2.2	hairy and enhancer of split 2.2	1.8966	6.19543	8.16991	3.98564e-07	8.87266e-05	6.80655	751634
12997932	BC095674	lrit1a	leucine-rich repeat, immunoglobulin-like and transmembrane domains 1a	-1.41192	5.53498	-8.17455	3.95599e-07	8.87266e-05	6.8138	553943
13197828	XM_692142	LOC568788	novel protein similar to vertebrate ADAM metallopeptidase with thrombospondin type 1 motif, 3 (ADAMTS3)	1.31088	6.83061	8.10706	4.41131e-07	9.60504e-05	6.70803	NA
13005124	BC154338	nin	ninein (GSK3B interacting protein)	1.25059	5.52392	8.109	4.39754e-07	9.60504e-05	6.71107	571879
13126984	BC122127	si:dkeyp-84a8.8	si:dkeyp-84a8.8	1.08207	5.95721	8.10511	4.42527e-07	9.60504e-05	6.70497	NA
12969485	AF304131	robo3	roundabout homolog 3	0.999527	8.11703	8.09414	4.50464e-07	9.61704e-05	6.6877	30770
13133363	BC153925	zgc:171453	zgc:171453	-1.17592	6.19218	-8.09839	4.4737e-07	9.61704e-05	6.6944	NA
13209562	AY805407	notch1b	notch homolog 1b	1.29734	8.03681	8.08273	4.58871e-07	9.71687e-05	6.66974	794892
13258681	XM_003199190	LOC100535324	MAGUK p55 subfamily member 4-like	-1.65403	5.23726	-8.07304	4.66138e-07	9.79115e-05	6.65447	NA
13211417	XM_001343253	LOC100003830	uncharacterized LOC100003830	1.57226	5.30295	8.05255	4.81913e-07	9.88339e-05	6.62213	NA
13022897	XM_001335844	LOC100000241	uncharacterized LOC100000241	-2.10161	6.12556	-8.05591	4.79293e-07	9.88339e-05	6.62743	NA
13253314	AY050500	gnat2	guanine nucleotide binding protein (G protein), alpha transducing activity polypeptide 2	-2.94867	7.86585	-8.05479	4.80166e-07	9.88339e-05	6.62566	140429
13060709	XM_001336435	LOC100000094	uncharacterized LOC100000094	-2.59998	5.52957	-8.04613	4.86969e-07	9.90906e-05	6.61199	NA
13226195	BC133144	sv2ba	synaptic vesicle glycoprotein 2 ba	-2.74291	6.09145	-8.03998	4.91867e-07	9.93115e-05	6.60226	100009626
13067682	BC060902	zgc:73075	zgc:73075	-3.27537	6.39921	-8.02237	5.06169e-07	0.000101413	6.57441	NA
13071711	BC058066	dus3l	dihydrouridine synthase 3-like (S. cerevisiae)	1.24076	6.45081	8.00383	5.21707e-07	0.000103728	6.54501	393647
13009519	BC059508	gabra6a	gamma-aminobutyric acid (GABA) A receptor, alpha 6a	-1.95883	5.03645	-7.98899	5.34506e-07	0.000105468	6.52144	393704
13205052	NM_001144131	grin1b	glutamate receptor, ionotropic, N-methyl D-aspartate 1b	-1.8927	7.73609	-7.98405	5.38832e-07	0.000105522	6.5136	100005675
13134569	BC163003	wnt1	wingless-type MMTV integration site family, member 1	1.03872	5.18407	7.9627	5.57983e-07	0.000108457	6.47963	30128
13177878	XM_001919091	LOC792447	germ cell-specific gene 1-like protein-like	-1.84933	4.57502	-7.95767	5.62592e-07	0.000108543	6.47163	792447
13235098	AF030284	dbx1a	developing brain homeobox 1a	1.37137	7.03251	7.92528	5.93279e-07	0.000112792	6.41996	30394
13249349	XM_695007	gabrd	gamma-aminobutyric acid (GABA) A receptor, delta	-1.34971	6.2438	-7.92736	5.9126e-07	0.000112792	6.42327	571422
13015483	NM_001161552	fosl1a	FOS-like antigen 1a	2.51292	7.06118	7.9197	5.98745e-07	0.000112951	6.41103	564241
12994343	XM_003199681	cnrip1b	cannabinoid receptor interacting protein 1b	-2.19435	7.71532	-7.9156	6.02785e-07	0.000112951	6.40449	556881
13019512	NM_001200012	si:dkey-4p15.3	si:dkey-4p15.3	2.42003	5.62567	7.89989	6.18553e-07	0.000113457	6.37935	562935
13175510	XM_678195	LOC555628	inositol 1,4,5-triphosphate receptor-interacting protein-like 2-like	1.48124	4.95664	7.90678	6.11589e-07	0.000113457	6.39037	NA
13245149	ENSDART00000140145	AJAP1	---	-1.32331	6.76563	-7.90287	6.15533e-07	0.000113457	6.38412	NA
13097880	BC045371	atf3	activating transcription factor 3	1.54959	6.40812	7.88076	6.38344e-07	0.000115777	6.34869	393939
13018175	XM_003200002	LOC100537178	e3 ubiquitin-protein ligase RNF14-like	1.33747	6.43828	7.8791	6.40096e-07	0.000115777	6.34603	100537178
13072957	NM_001045203	si:dkeyp-84f11.5	si:dkeyp-84f11.5	-0.952796	6.59299	-7.86594	6.54129e-07	0.0001175	6.32491	NA
13168700	BC116525	rgs9a	regulator of G-protein signaling 9a	-2.75621	5.94082	-7.85395	6.67203e-07	0.000119027	6.30564	767636
13152798	BC154552	zgc:172142	zgc:172142	1.04637	5.34268	7.84189	6.80621e-07	0.000120595	6.28624	NA
13029239	XM_001340105	LOC799825	protein lin-28 homolog A-like	1.69003	6.24321	7.83704	6.86107e-07	0.00012073	6.27842	NA
13187916	ENSDART00000149732	LOC100536180	uncharacterized LOC100536180	1.35825	6.90765	7.82899	6.95291e-07	0.00012073	6.26547	NA
13103866	XM_002665739	grm1a	glutamate receptor, metabotropic 1a	-1.37504	6.00416	-7.82999	6.94144e-07	0.00012073	6.26708	555576
13168292	BC057488	gtpbp1	GTP binding protein 1	1.5418	9.26782	7.8209	7.04665e-07	0.000121548	6.25242	378721
13188149	BC059476	slc25a3a	solute carrier family 25 (mitochondrial carrier; phosphate carrier), member 3a	-1.69774	6.19432	-7.8135	7.13348e-07	0.000122236	6.24049	393688
13231082	HM138692	slc1a2a	solute carrier family 1 (glial high affinity glutamate transporter), member 2a	-2.53297	5.7734	-7.7893	7.42553e-07	0.000126409	6.20139	560802
12978336	XM_001922694	LOC100001887	trafficking kinesin-binding protein 1-like	-1.02583	6.22141	-7.77833	7.56186e-07	0.000127894	6.18366	NA
13279232	ENSDART00000145048	IMPG2 (4 of 4)	interphotoreceptor matrix proteoglycan 2	-3.08313	6.27307	-7.76692	7.70666e-07	0.000129502	6.16517	NA
13259791	NM_001123277	si:dkey-91i10.3	si:dkey-91i10.3	-1.55456	5.39597	-7.74167	8.03721e-07	0.00013419	6.12423	565876
13181971	U14587	ascl1a	achaete-scute complex-like 1a (Drosophila)	1.63928	7.67893	7.72485	8.26577e-07	0.000137128	6.09689	30466
13158337	XM_002666924	LOC100333070	uncharacterized LOC100333070	1.51169	8.43728	7.71197	8.4453e-07	0.000138015	6.07593	NA
13180490	BC171476	ipo8	importin 8	1.27251	6.30804	7.70964	8.47825e-07	0.000138015	6.07213	555520
13021442	CU458878	mag	myelin associated glycoprotein	-2.05779	6.38918	-7.71428	8.41275e-07	0.000138015	6.0797	474346
13234265	ENSDART00000124851	LOC100538267	ATP-sensitive inward rectifier potassium channel 10-like	-1.35348	5.47562	-7.68059	8.89996e-07	0.00014398	6.02478	NA
13237529	CU458999	igdcc3	immunoglobulin superfamily, DCC subclass, member 3	1.05184	8.10478	7.65212	9.33471e-07	0.00015006	5.97824	555947
13250997	XM_001922310	si:dkeyp-51b7.3	si:dkeyp-51b7.3	-1.18687	6.28823	-7.64854	9.39099e-07	0.00015006	5.97237	100151577
13155286	XM_003201409	LOC100536841	cytosolic carboxypeptidase 1-like	-1.24766	6.54385	-7.63954	9.53385e-07	0.000151414	5.95764	NA
13155731	BC080256	syt9b	synaptotagmin IXb	-0.827311	5.16566	-7.6312	9.66836e-07	0.000152619	5.94396	445476
13234239	XM_688618	LOC565341	uncharacterized LOC565341	1.5192	8.63314	7.62587	9.75531e-07	0.000153064	5.93522	NA
13067483	BC162874	si:ch211-81a5.8	si:ch211-81a5.8	-1.66695	5.55241	-7.60173	1.01596e-06	0.000158453	5.89558	560648
13171484	ENSDART00000038727	DDX47 (1 of 2)	DEAD (Asp-Glu-Ala-Asp) box polypeptide 47	1.62299	8.30112	7.59037	1.03558e-06	0.000160552	5.8769	NA
12956290	BC078228	pibf1	progesterone immunomodulatory binding factor 1	1.07738	6.12477	7.58176	1.05072e-06	0.000160829	5.86272	445181
13165199	BC115305	nfixb	nuclear factor I/Xb	-1.33266	6.2638	-7.57928	1.05512e-06	0.000160829	5.85864	678521
12976503	EU031790	vip2	vasoactive intestinal polypeptide type II	-1.57934	4.95788	-7.57885	1.05589e-06	0.000160829	5.85793	NA
13191573	ENSDART00000122898	PHF21B (2 of 2)	PHD finger protein 21B	1.25461	7.20968	7.55085	1.107e-06	0.000165707	5.81175	NA
13156501	AY960153	celsr1b	cadherin EGF LAG seven-pass G-type receptor 1b	1.05728	7.04684	7.55187	1.1051e-06	0.000165707	5.81343	556520
13016365	BC163761	zgc:195063	zgc:195063	-1.69813	5.44627	-7.55575	1.09787e-06	0.000165707	5.81985	NA
13200358	AF072657	coe2	coe2	1.34167	6.77961	7.52269	1.16104e-06	0.000172803	5.76519	NA
13111534	BC045884	rars	arginyl-tRNA synthetase	1.32146	7.25077	7.50297	1.20051e-06	0.000174684	5.73252	337070
13053148	U62898	vsx2	visual system homeobox 2	1.27447	6.63299	7.50318	1.20008e-06	0.000174684	5.73286	796163
13042411	ENSDART00000138318	LOC570775	protein argonaute-1-like	1.16936	7.73634	7.50339	1.19964e-06	0.000174684	5.73322	NA
13086790	NM_001100084	LOC100003595	novel protein similar to vertebrate adenylate cyclase family	-1.49687	5.07251	-7.50751	1.1913e-06	0.000174684	5.74004	NA
13166921	BC092758	cbx7a	chromobox homolog 7a	2.17303	5.87876	7.49256	1.2219e-06	0.000175905	5.71526	550551
13047164	XM_682063	LOC558797	interphotoreceptor matrix proteoglycan 1-like	-0.977323	4.64393	-7.49232	1.22241e-06	0.000175905	5.71485	NA
13273173	ENSDART00000126025	VPRBP (1 of 2)	Vpr (HIV-1) binding protein	1.12863	6.01785	7.48876	1.22982e-06	0.000176	5.70894	NA
13032341	AF465261	invs	inversin	1.18497	6.34582	7.48085	1.24645e-06	0.000177405	5.69581	245946
13017961	BC090467	nmd3	NMD3 homolog (S. cerevisiae)	1.63109	7.6424	7.46291	1.28507e-06	0.000181886	5.66597	541444
13099490	BC116466	taf1a	TATA box binding protein (TBP)-associated factor, RNA polymerase I, A	0.927448	5.4439	7.45979	1.29191e-06	0.000181886	5.66079	567105
13079925	AB212995	grk7a	G-protein-coupled receptor kinase 7a	-2.35692	5.05814	-7.4382	1.34032e-06	0.000187688	5.62481	566120
13111199	XM_001345079	LOC100006333	teneurin-2-like	-1.98845	5.81019	-7.42803	1.36378e-06	0.000189952	5.60784	NA
13012515	AY581210	atoh1b	atonal homolog 1b	1.19461	4.92743	7.40573	1.41672e-06	0.000195238	5.57059	493915
13228941	EU341835	aqp9b	aquaporin 9b	-3.28227	6.91216	-7.40649	1.41488e-06	0.000195238	5.57186	570191
13248342	XM_001333478	LOC793708	calcium channel, voltage-dependent, L type, alpha 1F subunit-like	-1.45999	5.70445	-7.40146	1.4271e-06	0.000195633	5.56345	NA
13132360	BC045429	exosc10	exosome component 10	1.27884	7.32773	7.38446	1.46922e-06	0.000200353	5.53499	394064
13300506	XM_685802	si:ch211-155d24.7	si:ch211-155d24.7	-1.53182	4.53039	-7.36644	1.5153e-06	0.00020556	5.50477	NA
13260592	BC095319	trim13	tripartite motif-containing 13	-1.05493	6.17594	-7.34248	1.57892e-06	0.000213081	5.46451	553630
13113457	XM_003200815	LOC100535971	neurogenic locus notch homolog protein 1-like	1.88674	6.90355	7.33835	1.59015e-06	0.000213465	5.45758	NA
13214766	BC155323	fam5ca	family with sequence similarity 5, member Ca	-0.937739	6.77776	-7.33543	1.59816e-06	0.000213465	5.45266	NA
13250609	AY099514	tsr2	TSR2, 20S rRNA accumulation, homolog (S. cerevisiae)	1.08629	8.05485	7.33006	1.61299e-06	0.000214346	5.44362	317639
12968026	XM_688234	LOC564916	GDNF family receptor alpha-2-like	-1.18728	6.08676	-7.32278	1.6333e-06	0.000215944	5.43137	NA
12964998	XM_003199384	LOC100537217	uncharacterized LOC100537217	-1.37392	4.94315	-7.31044	1.66836e-06	0.000219466	5.41057	NA
12953011	XM_693978	grin2ab	glutamate receptor, ionotropic, N-methyl D-aspartate 2A, b	-1.42644	6.03683	-7.28968	1.72915e-06	0.000226319	5.37553	570493
13111609	XM_001339844	gemin5	gem (nuclear organelle) associated protein 5	0.915613	5.97581	7.28189	1.75254e-06	0.000227097	5.36237	799538
13026591	XR_117663	LOC100537033	uncharacterized LOC100537033	-1.48432	6.41837	-7.28327	1.74839e-06	0.000227097	5.36469	NA
13055398	BC076271	parp6a	poly (ADP-ribose) polymerase family, member 6a	-0.932531	6.41823	-7.26817	1.79457e-06	0.000231393	5.33916	436810
13133211	BC095146	camkvl	CaM kinase-like vesicle-associated, like	-1.23781	6.23988	-7.25765	1.82749e-06	0.000234476	5.32135	553431
12952444	BC093351	eed	embryonic ectoderm development	0.918997	7.33657	7.24848	1.85672e-06	0.00023706	5.3058	550463
13300540	XM_703105	LOC562307	uncharacterized LOC562307	1.20573	8.88623	7.24182	1.87827e-06	0.000237959	5.2945	NA
13188328	BC085629	mybpc1	myosin binding protein C, slow type	-1.62575	5.98953	-7.24066	1.88204e-06	0.000237959	5.29254	492356
13107191	ENSDART00000129929	tcf4	transcription factor 4	-1.05762	7.44927	-7.22671	1.92806e-06	0.0002426	5.26887	100526651
12981092	NM_001118895	rrp9	ribosomal RNA processing 9, small subunit (SSU) processome component, homolog (yeast)	1.05243	5.39243	7.22313	1.94008e-06	0.000242939	5.26278	402808
12979596	DQ224359	optc	opticin	2.29026	6.2468	7.20198	2.01258e-06	0.000247121	5.22682	445189
13024666	XM_690545	atf5b	activating transcription factor 5b	2.17344	8.1082	7.2074	1.99374e-06	0.000247121	5.23604	567253
13059624	BC116487	si:ch211-160d20.3	si:ch211-160d20.3	1.20465	6.94897	7.196	2.03362e-06	0.000247121	5.21663	692267
13178390	AF152001	notch3	notch homolog 3	1.18504	8.35611	7.18625	2.06836e-06	0.000247121	5.20003	58066
13056798	XM_001919998	LOC100150699	uncharacterized LOC100150699	1.1543	5.55613	7.20311	2.00864e-06	0.000247121	5.22874	100150699
13062265	AY648720	nup205	nucleoporin 205	0.835512	6.74034	7.20239	2.01117e-06	0.000247121	5.22751	445382
13179871	BC154447	ano2	anoctamin 2	-1.19953	4.99426	-7.19725	2.02919e-06	0.000247121	5.21876	566373
12972707	BC081377	reep6	receptor accessory protein 6	-1.52034	5.17082	-7.18707	2.06542e-06	0.000247121	5.20142	447918
13149106	BC095109	syt5b	synaptotagmin Vb	-2.12923	6.19613	-7.19198	2.04787e-06	0.000247121	5.20978	553567
13215935	BC055605	opn1mw2	opsin 1 (cone pigments), medium-wave-sensitive, 2	-2.73016	5.99186	-7.19035	2.0537e-06	0.000247121	5.207	360151
13108735	ENSDART00000114677	CAMKK2	calcium/calmodulin-dependent protein kinase kinase 2, beta	-0.962118	5.69918	-7.18238	2.08234e-06	0.000247655	5.19343	NA
13077884	DQ851840	prdm1b	PR domain containing 1b, with ZNF domain	1.68124	8.07283	7.16653	2.1406e-06	0.000253427	5.16637	569677
13193747	BC151911	isg15	ISG15 ubiquitin-like modifier	1.60933	4.83722	7.15814	2.17209e-06	0.000254838	5.15206	558956
13175198	FJ648072	im:7162084	im:7162084	1.51701	4.76625	7.15925	2.16789e-06	0.000254838	5.15395	NA
13107007	NM_001172556	bxdc2	brix domain containing 2	1.4383	6.19225	7.15054	2.20107e-06	0.000255962	5.13906	402823
13094523	NM_001045010	si:dkey-174m14.3	si:dkey-174m14.3	-0.971014	5.69496	-7.14792	2.21114e-06	0.000255962	5.13458	563117
12992434	XM_681138	LOC557975	uncharacterized LOC557975	-1.36006	4.66013	-7.15044	2.20145e-06	0.000255962	5.13889	NA
13282608	AY187048	nrarpb	notch-regulated ankyrin repeat protein b	1.15208	7.33937	7.13494	2.26179e-06	0.000259518	5.11238	353225
13199395	AB212994	grk1b	G protein-coupled receptor kinase 1 b	-2.99487	5.39044	-7.13512	2.26109e-06	0.000259518	5.11268	550406
13300398	NM_131337	sox11b	SRY-box containing gene 11b	1.29447	7.99129	7.12148	2.31561e-06	0.000261093	5.08931	30603
13004833	BC067723	mycl1a	v-myc myelocytomatosis viral oncogene homolog 1, lung carcinoma derived (avian) a	0.854331	5.70661	7.1284	2.28778e-06	0.000261093	5.10117	NA
13224971	XM_001918943	LOC100148594	uncharacterized LOC100148594	-1.24358	5.48137	-7.12213	2.31296e-06	0.000261093	5.09044	NA
12991190	EU341834	aqp8a.2	aquaporin 8a, tandem duplicate 2	-2.14125	5.20191	-7.1247	2.30259e-06	0.000261093	5.09484	563130
13198914	FJ392628	nrgna	neurogranin (protein kinase C substrate, RC3) a	-1.53405	5.76705	-7.10736	2.3735e-06	0.000266467	5.06509	567608
13178820	BC098528	usp36	ubiquitin specific peptidase 36	1.45778	7.96638	7.09969	2.40558e-06	0.000267759	5.05193	327239
13140918	XM_001335344	dnajc22	DnaJ (Hsp40) homolog, subfamily C, member 22	-1.15068	5.16496	-7.10069	2.40137e-06	0.000267759	5.05364	796659
13118398	BC051152	hspa4a	heat shock protein 4a	1.39825	7.35648	7.09066	2.44391e-06	0.00026972	5.03642	335865
13273277	AY648746	wdr46	WD repeat domain 46	1.0156	6.34962	7.09197	2.43832e-06	0.00026972	5.03867	393596
13130989	AF143493	tcp1	t-complex polypeptide 1	1.39079	8.77282	7.05604	2.59689e-06	0.000280658	4.97685	30477
13231871	AY750154	drd4b	dopamine receptor D4b	-0.830092	4.90899	-7.05637	2.59538e-06	0.000280658	4.97742	503565
13013288	ENSDART00000014454	zgc:110204	zgc:110204	-1.57253	6.25395	-7.06493	2.5567e-06	0.000280658	4.99215	550520
13076523	NM_001082901	col8a2	collagen, type VIII, alpha 2	-1.66246	6.38228	-7.05706	2.59228e-06	0.000280658	4.97859	794479
13110287	BC151864	wu:fb15e04	wu:fb15e04	-2.62964	8.05488	-7.0631	2.56493e-06	0.000280658	4.989	NA
13050452	XM_001332478	LOC792891	insulinoma-associated protein 1-like	1.02883	5.77639	7.04692	2.63885e-06	0.000284015	4.96112	NA
12965969	BC047813	zgc:56039	zgc:56039	0.88869	8.12115	7.02176	2.75831e-06	0.00029565	4.91767	NA
13024866	BC057500	thyn1	thymocyte nuclear protein 1	1.15778	4.73015	7.0111	2.81058e-06	0.000300018	4.89924	393630
13203616	AF525745	gria3a	glutamate receptor, ionotropic, AMPA 3a	-1.42256	7.04914	-7.00307	2.85065e-06	0.000303054	4.88534	170452
13077723	BC068429	zgc:85936	zgc:85936	1.12086	6.5021	6.97576	2.99148e-06	0.000316732	4.838	406563
13026568	U31079	serpinh1b	serpin peptidase inhibitor, clade H (heat shock protein 47), member 1b	1.35879	9.82159	6.95754	3.08944e-06	0.000325779	4.80636	30449
13274197	XM_002667721	LOC100333482	tubulin polymerization-promoting protein-like	-1.48031	5.65842	-6.95524	3.10201e-06	0.000325786	4.80237	NA
13277038	ENSDART00000124054	whsc1	Wolf-Hirschhorn syndrome candidate 1	1.00741	7.29362	6.94735	3.14568e-06	0.000326586	4.78864	100000709
13057349	XM_677926	si:ch211-242e8.1	si:ch211-242e8.1	-1.28884	5.16809	-6.94932	3.13474e-06	0.000326586	4.79206	555427
13166611	AY391444	nr1d1	nuclear receptor subfamily 1, group d, member 1	-2.15163	6.26092	-6.94482	3.15978e-06	0.000326586	4.78425	494487
13169795	BC097229	rcvrna	recoverin a	-2.78708	7.42854	-6.9464	3.15097e-06	0.000326586	4.78699	570333
13140840	XM_001334580	si:ch211-156j22.4	si:ch211-156j22.4	1.02415	6.50539	6.93984	3.18784e-06	0.000326891	4.77557	795944
13160376	XM_003201403	LOC100535817	synaptic vesicle glycoprotein 2B-like	-1.15083	7.00147	-6.94133	3.17938e-06	0.000326891	4.77818	NA
13078177	XM_002667472	LOC100331149	oxysterol-binding protein-related protein 1-like	-1.12597	5.03629	-6.93115	3.2373e-06	0.000330662	4.76044	100331149
13272093	BC142872	gabrb2l	gamma-aminobutyric acid (GABA) A receptor, beta 2 like	-1.43704	6.53062	-6.92246	3.2876e-06	0.000334488	4.7453	100332196
13193924	XR_117678	LOC562819	novel NACHT domain containing protein	0.859192	4.64633	6.91638	3.32325e-06	0.000335419	4.7347	NA
13177925	BC081499	zgc:103625	zgc:103625	-1.22299	5.01641	-6.91564	3.32763e-06	0.000335419	4.73341	447931
13059875	NM_001080165	colm	collomin	-1.81068	5.70487	-6.91433	3.33539e-06	0.000335419	4.73112	NA
13282074	BC058306	pou3f1	POU class 3 homeobox 1	0.95103	8.28755	6.90797	3.3733e-06	0.000337927	4.72002	30398
13209771	BC059654	rom1a	retinal outer segment membrane protein 1a	-2.33145	5.79034	-6.90504	3.3909e-06	0.000338388	4.71491	393767
12975873	XM_003199510	LOC100537878	low-density lipoprotein receptor class A domain-containing protein 2-like	1.03645	5.86079	6.89637	3.44353e-06	0.000342329	4.69977	NA
12947735	AF207751	zic2b	zic family member 2 (odd-paired homolog, Drosophila) b	0.975633	5.43838	6.88473	3.51562e-06	0.000345539	4.67942	570746
13131441	XM_002667658	LOC100330754	tubby-related protein 1-like	-1.29727	6.09795	-6.88663	3.50373e-06	0.000345539	4.68275	NA
12945252	BC154045	rgs11	regulator of G-protein signaling 11	-1.36958	4.97472	-6.88885	3.48988e-06	0.000345539	4.68664	559197
13166012	AY205256	smarca4	SWI/SNF related, matrix associated, actin dependent regulator of chromatin, subfamily a, member 4	0.946549	8.23998	6.88108	3.53849e-06	0.00034648	4.67304	NA
12956135	BC090687	lbx1b	ladybird homeobox 1b	1.07218	5.18395	6.86892	3.61594e-06	0.000348818	4.65177	793810
13090868	BC162193	pcp4l1	Purkinje cell protein 4 like 1	-1.85378	6.08747	-6.87438	3.58098e-06	0.000348818	4.66132	100008021
13252001	BC059491	guk1b	guanylate kinase 1b	-2.19198	5.08752	-6.8703	3.60707e-06	0.000348818	4.65418	393697
13275145	NM_001089376	stxbp1b	syntaxin binding protein 1b	-2.30515	7.27019	-6.87181	3.59741e-06	0.000348818	4.65682	557717
13300408	XM_001344137	LOC100005016	uncharacterized LOC100005016	2.04385	5.78169	6.85897	3.6807e-06	0.000353754	4.63433	NA
13142330	BC162171	zgc:193690	zgc:193690	0.784718	3.91412	6.85667	3.69577e-06	0.000353898	4.63031	563448
13137421	BC095091	pacsin1a	protein kinase C and casein kinase substrate in neurons 1a	-1.1269	6.43481	-6.84711	3.7594e-06	0.000356939	4.61353	553559
12977225	XM_001344881	LOC100006044	fas apoptotic inhibitory molecule 2-like	-1.35792	5.38993	-6.84618	3.76565e-06	0.000356939	4.6119	NA
13216146	AY050499	gnat1	guanine nucleotide binding protein (G protein), alpha transducing activity polypeptide 1	-3.48919	5.96516	-6.84573	3.76864e-06	0.000356939	4.61112	140428
13220797	BC091690	im:7152348	im:7152348	1.20187	5.79709	6.84243	3.79095e-06	0.000357191	4.60532	559250
13203590	AY070260	plp1b	proteolipid protein 1b	-1.68945	6.6651	-6.84128	3.79874e-06	0.000357191	4.6033	368234
13191568	ENSDART00000129223	CABZ01111990.1	---	1.16731	6.09951	6.82433	3.91554e-06	0.00036685	4.57353	NA
13303552	XM_001922025	LOC797305	alanyl-tRNA synthetase, cytoplasmic-like	1.03038	6.29814	6.81917	3.9518e-06	0.00036892	4.56447	797305
13165291	XM_003198077	si:dkey-93n13.3	si:dkey-93n13.3	-1.00929	5.27896	-6.80788	4.03248e-06	0.000374295	4.5446	558815
13100044	GQ273498	wisp3	WNT1 inducible signaling pathway protein 3	-1.41088	5.89397	-6.8071	4.03812e-06	0.000374295	4.54323	794092
13170372	XM_678907	LOC556170	uncharacterized LOC556170	-1.49387	5.51807	-6.80349	4.06428e-06	0.000375383	4.53688	NA
13140701	NM_001214908	wu:fc13c02	wu:fc13c02	1.0845	8.65069	6.78139	4.22847e-06	0.000387798	4.49794	NA
13234873	EU348853	rlbp1a	retinaldehyde binding protein 1a	-2.01513	5.73649	-6.78241	4.22076e-06	0.000387798	4.49973	393678
13062111	NM_001128343	grm3	glutamate receptor, metabotropic 3	-1.12806	5.37819	-6.77211	4.2995e-06	0.000392929	4.48156	565256
12996522	BC059196	eif3s10	eukaryotic translation initiation factor 3, subunit 10 (theta)	1.48119	7.52268	6.75708	4.41715e-06	0.00040227	4.45501	327515
13200422	XM_686128	si:ch211-271b14.7	si:ch211-271b14.7	-1.17033	6.09324	-6.74896	4.48212e-06	0.000406764	4.44065	NA
13061267	CU458926	nptnb	neuroplastin b	-1.20393	7.27893	-6.73889	4.56401e-06	0.00041133	4.42284	403006
13247590	AB292795	mapkapk2b	mitogen-activated protein kinase-activated protein kinase 2b	-1.57659	5.0628	-6.739	4.5631e-06	0.00041133	4.42303	557648
13271207	XM_002667305	LOC100333826	fas-binding factor 1 homolog	0.98979	5.99394	6.72524	4.6776e-06	0.000420113	4.39866	100333826
13000203	ENSDART00000082348	PRTG (1 of 2)	protogenin	1.00715	5.17669	6.71796	4.73937e-06	0.000424198	4.38575	NA
13203183	NM_001109769	wscd2	WSC domain containing 2	-1.13483	5.95603	-6.71414	4.7721e-06	0.000424942	4.37898	561091
13286464	BC059650	arr3b	arrestin 3b, retinal (X-arrestin)	-3.60023	6.47654	-6.71319	4.78032e-06	0.000424942	4.37729	796867
12957248	BC096884	cabp2a	calcium binding protein 2a	-1.95114	4.23091	-6.69555	4.9349e-06	0.000437191	4.34598	572226
13119059	XM_003200918	celsr2	cadherin, EGF LAG seven-pass G-type receptor 2 (flamingo homolog, Drosophila)	1.33263	7.67245	6.69204	4.96624e-06	0.000438477	4.33975	560426
13151844	ENSDART00000105741	CABZ01041804.1	---	-2.54598	6.74164	-6.68743	5.0078e-06	0.000440652	4.33155	NA
13141015	AF204240	neurod4	neurogenic differentiation 4	1.01937	8.4682	6.67945	5.08053e-06	0.00044477	4.31736	266958
13200788	ENSDART00000143860	SI:CH211-154E10.1	---	-1.6243	5.79964	-6.6767	5.10582e-06	0.00044477	4.31247	NA
13228651	BC060909	gnao1b	guanine nucleotide binding protein (G protein), alpha activating activity polypeptide O, b	-1.6437	8.75212	-6.67852	5.0891e-06	0.00044477	4.3157	393801
13179273	BC085436	tbl3	transducin (beta)-like 3	0.9524	6.30978	6.66893	5.17816e-06	0.000449568	4.29863	492761
12999865	XM_001921133	anapc1	anaphase promoting complex subunit 1	0.835905	6.33204	6.66454	5.21946e-06	0.000451648	4.29081	568795
12958228	AF229448	jag1a	jagged 1a	1.04825	5.89842	6.66222	5.24141e-06	0.000452045	4.28668	140421
13187407	BC098615	irak3	interleukin-1 receptor-associated kinase 3	1.23844	4.50971	6.65628	5.29809e-06	0.000453927	4.27609	567444
13057447	EU877072	mt2	metallothionein 2	-1.14801	4.76498	-6.65742	5.28712e-06	0.000453927	4.27813	100174951
13041641	ENSDART00000113851	wu:fb25h12	wu:fb25h12	-1.21923	6.64868	-6.64741	5.38387e-06	0.000459765	4.26029	NA
13283020	BC115061	si:ch211-239e6.4	si:ch211-239e6.4	0.864264	5.62978	6.64349	5.42229e-06	0.000460029	4.25329	563220
13050798	BC070006	zgc:85722	zgc:85722	-0.826428	6.52599	-6.64513	5.40614e-06	0.000460029	4.25622	407982
13030567	BC078350	grwd1	glutamate-rich WD repeat containing 1	1.09901	7.08002	6.63178	5.53863e-06	0.000468374	4.23239	445115
13193080	U77627	pes	pescadillo	0.911999	6.23035	6.6271	5.58586e-06	0.000470839	4.22403	30228
13256607	NM_001118893	vps13a	vacuolar protein sorting 13 homolog A (S. cerevisiae)	0.764829	7.32453	6.6251	5.60617e-06	0.000471027	4.22046	378837
13060926	XM_001343647	LOC100004357	secretory carrier-associated membrane protein 5A-like	-2.37802	8.6489	-6.62222	5.63563e-06	0.000471979	4.2153	NA
12984092	XM_685638	arhgap23b	Rho GTPase activating protein 23b	-1.17972	3.99278	-6.5966	5.90422e-06	0.000492889	4.16946	562244
13156596	XM_687255	cald1	caldesmon 1	-1.68978	5.24023	-6.59042	5.9709e-06	0.000496863	4.15841	NA
13283324	AY264404	her15.1	hairy and enhancer of split-related 15.1	1.37032	6.69824	6.58753	6.0024e-06	0.000497894	4.15323	359836
13264267	XM_002663311	galnt13	UDP-N-acetyl-alpha-D-galactosamine:polypeptide N-acetylgalactosaminyltransferase 13	-1.02335	6.26745	-6.58214	6.06161e-06	0.000501209	4.14356	100330695
13146438	BC091979	aglb	amylo-1, 6-glucosidase, 4-alpha-glucanotransferase b	-2.61388	6.42027	-6.5685	6.21419e-06	0.000512199	4.11908	553352
12994131	BC160629	ddx21	DEAD (Asp-Glu-Ala-Asp) box polypeptide 21	1.12842	5.91957	6.56295	6.2774e-06	0.000514155	4.10912	799650
13244777	NM_001126416	rexo1	REX1, RNA exonuclease 1 homolog (S. cerevisiae)	0.692473	5.77232	6.56322	6.27428e-06	0.000514155	4.10961	564551
13243475	AF330001	unc45b	unc-45 homolog B (C. elegans)	1.83262	7.17551	6.55208	6.40312e-06	0.0005199	4.08959	266640
13233446	XM_693405	LOC569982	histone H1-like	1.56004	9.32135	6.55182	6.4061e-06	0.0005199	4.08913	569982
13243064	XM_003199054	si:ch211-255g12.6	si:ch211-255g12.6	-2.32894	7.1633	-6.55171	6.40743e-06	0.0005199	4.08893	799480
12964850	XM_690308	vezf1a	vascular endothelial zinc finger 1a	1.27925	9.38861	6.54873	6.44234e-06	0.000521109	4.08357	567023
13048911	BC056275	zgc:65772	zgc:65772	1.22116	6.47248	6.53496	6.60644e-06	0.00052161	4.0588	NA
13112778	XM_003200791	depdc1b	DEP domain containing 1B	1.15512	6.45372	6.53839	6.5652e-06	0.00052161	4.06497	100006170
13226405	BC093344	prmt3	protein arginine methyltransferase 3	0.999989	6.75577	6.53464	6.61032e-06	0.00052161	4.05822	550348
13017512	BC056813	tcerg1a	transcription elongation regulator 1a (CA150)	0.955429	6.4258	6.53312	6.62877e-06	0.00052161	4.05548	323071
13110268	BC122411	ddx10	DEAD (Asp-Glu-Ala-Asp) box polypeptide 10	0.942699	6.02249	6.53333	6.62618e-06	0.00052161	4.05586	569118
13041140	BC076268	rpp25l	ribonuclease P/MRP 25 subunit-like	0.930298	5.85055	6.53337	6.62564e-06	0.00052161	4.05594	436813
13046680	AY512780	disp2	dispatched homolog 2 (Drosophila)	-0.960094	6.58139	-6.53719	6.57962e-06	0.00052161	4.06281	405793
13056215	XM_003200425	si:dkey-30c15.3	si:dkey-30c15.3	-1.36602	4.65653	-6.53574	6.59705e-06	0.00052161	4.0602	NA
13208986	XM_003198709	LOC100535872	serine/threonine-protein phosphatase with EF-hands 2-like	-1.61182	3.75195	-6.53746	6.57631e-06	0.00052161	4.0633	NA
12986316	BC159112	zgc:171544	zgc:171544	-1.62195	5.67798	-6.5307	6.65808e-06	0.000522339	4.05113	NA
13286128	BC115041	fstl5	follistatin-like 5	-1.7572	7.48112	-6.52321	6.74987e-06	0.000527949	4.03765	566192
12988527	BC107965	foxk2	forkhead box K2	0.890444	8.5628	6.52064	6.7817e-06	0.000528851	4.03301	324141
13220879	BC163129	glmnb	glomulin, FKBP associated protein b	-1.87509	4.92888	-6.51019	6.91265e-06	0.000537454	4.01417	100170791
13150091	ENSDART00000081960	LOC559157	contactin-associated protein-like 2-like	-1.20768	6.61692	-6.50481	6.98109e-06	0.000541159	4.00447	NA
13068137	BC050512	ctps1a	CTP synthase 1a	1.17157	6.65516	6.49937	7.05111e-06	0.000544965	3.99464	322089
13106756	BC163166	hsp90aa1.2	heat shock protein 90, alpha (cytosolic), class A member 1, tandem duplicate 2	2.16195	8.53908	6.49554	7.10067e-06	0.000545808	3.98774	565155
13088203	BC150244	chd7	chromodomain helicase DNA binding protein 7	0.930637	8.01115	6.49529	7.10393e-06	0.000545808	3.98728	569471
13073330	GU434296	dbpa	D site of albumin promoter (albumin D-box) binding protein a	-1.17025	6.75564	-6.49316	7.1317e-06	0.00054633	3.98344	565056
13066431	BC153926	oscp1a	organic solute carrier partner 1a	-1.4167	5.06366	-6.48884	7.18845e-06	0.000549063	3.97563	100002307
13118755	XM_001920867	larp1	La ribonucleoprotein domain family, member 1	0.867311	7.85317	6.48519	7.23677e-06	0.000551138	3.96903	327175
13286832	BC162326	dpysl5b	dihydropyrimidinase-like 5b	-1.15223	7.90148	-6.47218	7.41161e-06	0.000562807	3.94551	553410
13111271	BC059431	arl3l1	ADP-ribosylation factor-like 3, like 1	-2.04294	6.40649	-6.4696	7.44678e-06	0.000563834	3.94084	393666
13205412	XM_690775	ssh1b	slingshot homolog 1b (Drosophila)	-0.967328	6.88084	-6.46641	7.49062e-06	0.000564571	3.93506	567479
12981897	XM_001345807	pcdh20	protocadherin 20	-1.12997	4.36526	-6.46574	7.49987e-06	0.000564571	3.93384	568796
13237469	BC049436	mphosph10	M-phase phosphoprotein 10 (U3 small nucleolar ribonucleoprotein)	1.39641	5.79826	6.4603	7.57515e-06	0.000568595	3.924	323426
13234361	BC116551	pfdn2	prefoldin subunit 2	1.11295	8.34414	6.45108	7.70461e-06	0.000575258	3.90731	323012
13166837	XM_697961	wu:fd16e03	wu:fd16e03	0.981348	4.53282	6.45084	7.7081e-06	0.000575258	3.90686	NA
13296718	BC134184	wu:fb16f09	wu:fb16f09	1.0603	6.35353	6.44251	7.82705e-06	0.000582467	3.89177	NA
12999795	BC092917	olig4	oligodendrocyte transcription factor 4	1.36135	5.86257	6.43983	7.86579e-06	0.000582707	3.8869	324857
13201190	AY648776	rcl1	RNA terminal phosphate cyclase-like 1	1.00622	6.35173	6.43824	7.88883e-06	0.000582707	3.88402	445388
13242915	BC114289	myl2b	myosin, light polypeptide 2b, regulatory, cardiac, slow	-1.25247	4.33836	-6.43765	7.8974e-06	0.000582707	3.88295	677750
13287502	ENSDART00000132881	ACANA	---	-1.54388	6.75432	-6.43386	7.95272e-06	0.000585132	3.87607	NA
13283160	BC124078	grin1a	glutamate receptor, ionotropic, N-methyl D-aspartate 1a	-1.0336	8.295	-6.42847	8.03209e-06	0.000589307	3.86628	767745
13013543	HM114349	im:7137886	im:7137886	1.37319	6.67297	6.42422	8.09516e-06	0.000592265	3.85857	NA
13083313	BC117599	homez	homeodomain leucine zipper gene	1.38225	7.65386	6.40769	8.3457e-06	0.000607845	3.82853	NA
13113799	DQ314736	crb2a	crumbs homolog 2a	1.02954	5.99211	6.40408	8.40145e-06	0.000607845	3.82197	723994
13078744	EU727458	slc1a7a	solute carrier family 1 (glutamate transporter), member 7a	-1.16918	4.51023	-6.40569	8.37654e-06	0.000607845	3.8249	100170783
13044544	BC122282	gabrr2a	gamma-aminobutyric acid (GABA) A receptor, rho 2a	-1.23695	5.2083	-6.40452	8.39472e-06	0.000607845	3.82276	751659
13244180	NM_001145786	dnttip2	deoxynucleotidyltransferase, terminal, interacting protein 2	1.56555	7.13638	6.39677	8.5156e-06	0.000609446	3.80867	564961
13279118	ENSDART00000145767	CELSR2	---	1.15591	8.02102	6.39686	8.51416e-06	0.000609446	3.80883	NA
13059368	BC091978	kcnab1	potassium voltage-gated channel, shaker-related subfamily, beta member 1	-1.01731	5.05641	-6.39667	8.51718e-06	0.000609446	3.80848	NA
13222622	XM_001339170	myhb	myosin, heavy chain b	-3.23855	5.60532	-6.40064	8.45495e-06	0.000609446	3.81571	100002040
12950452	XM_678243	nfixa	nuclear factor I/Xa	-1.13836	7.01278	-6.38898	8.63895e-06	0.000616466	3.79449	555669
13115247	ENSDART00000065649	LOC797032	growth arrest and DNA damage-inducible protein GADD45 gamma-like	0.740587	4.12765	6.38519	8.69979e-06	0.000619112	3.78757	797032
12977653	ENSDART00000110033	BX255969.1	---	-1.1727	5.2659	-6.38181	8.75426e-06	0.000619602	3.78142	NA
13093348	ENSDART00000006621	LOC100329607	ATP-sensitive inward rectifier potassium channel 10-like	-1.41217	5.89815	-6.38182	8.75407e-06	0.000619602	3.78144	NA
13215598	XM_680574	slc4a8	solute carrier family 4, sodium bicarbonate cotransporter, member 8	-1.13803	6.0284	-6.37818	8.81319e-06	0.000622082	3.77481	557494
13047483	NM_001204248	eprs	glutamyl-prolyl-tRNA synthetase	1.30986	8.93183	6.37009	8.94604e-06	0.000628055	3.76006	562037
12955347	BC091789	trim2a	tripartite motif-containing 2a	-0.764695	6.28122	-6.371	8.93106e-06	0.000628055	3.76171	100003782
13145173	BC134150	zgc:162928	zgc:162928	-0.693409	5.90368	-6.36577	9.01793e-06	0.0006314	3.75217	557144
13010947	XM_684615	si:ch73-335m24.5	si:ch73-335m24.5	-0.748458	6.63721	-6.3623	9.07597e-06	0.000633761	3.74584	561209
13055224	XM_003200406	LOC553462	uncharacterized LOC553462	0.94972	5.66979	6.35618	9.17933e-06	0.000635864	3.73467	NA
12946404	XM_001337487	LOC797069	e3 ubiquitin-protein ligase MARCH1-like	-1.38784	5.85322	-6.35645	9.17477e-06	0.000635864	3.73516	NA
13158274	XM_002666937	ccdc136b	coiled-coil domain containing 136b	-1.67385	5.34123	-6.35834	9.14278e-06	0.000635864	3.73861	100321715
13225480	XM_003198885	LOC100537402	uncharacterized LOC100537402	1.39297	9.13976	6.34993	9.2863e-06	0.000637091	3.72325	NA
13129173	XM_002666310	LOC100333582	zinc finger protein GLIS2-like	1.0734	6.71103	6.34801	9.31935e-06	0.000637091	3.71975	NA
13086492	NM_001099983	arl14	ADP-ribosylation factor-like 14	0.875547	5.44128	6.34809	9.318e-06	0.000637091	3.71989	556921
13048891	XM_002665273	LOC100334672	uncharacterized LOC100334672	0.721983	5.83494	6.34904	9.30166e-06	0.000637091	3.72162	NA
13022132	XM_693062	LOC569664	calsyntenin-2-like	-0.975802	5.41312	-6.34892	9.30369e-06	0.000637091	3.72141	NA
13133538	XM_691849	si:ch73-21g5.7	si:ch73-21g5.7	1.65344	5.51388	6.33921	9.47272e-06	0.000642528	3.70365	568516
13100160	NM_001025553	gabrr1	gamma-aminobutyric acid (GABA) receptor, rho 1	-1.21888	5.1783	-6.3417	9.42909e-06	0.000642528	3.70821	568984
13254742	ENSDART00000140365	slc12a5b	solute carrier family 12 (potassium/chloride transporter), member 5b	-1.34432	6.8916	-6.3392	9.47289e-06	0.000642528	3.70364	797331
13211441	NM_001100951	bcl11ab	B-cell CLL/lymphoma 11Ab	0.890708	7.92471	6.33254	9.59066e-06	0.000648827	3.69145	566491
12986016	Y14534	hoxb8b	homeo box B8b	1.25622	5.95471	6.33049	9.62716e-06	0.000649609	3.68771	30420
13018504	BC092944	her13	hairy-related 13	1.45607	6.65233	6.32733	9.68374e-06	0.000651738	3.68193	550600
13211260	AB183390	gad1b	glutamate decarboxylase 1b	-1.17377	6.96248	-6.32195	9.78095e-06	0.000656584	3.67208	378441
13032100	ENSDART00000149466	si:ch73-103b2.3	si:ch73-103b2.3	-3.04147	8.23955	-6.31895	9.83567e-06	0.00065856	3.66658	NA
13086313	BC056570	saga	S-antigen; retina and pineal gland (arrestin) a	-2.01404	5.52842	-6.31395	9.92729e-06	0.00066299	3.65743	792319
13276814	ENSDART00000133367	ablim1b	actin binding LIM protein 1b	0.892601	8.40856	6.30008	1.01867e-05	0.000678572	3.632	541550
13299920	DQ640387	sult2st2	sulfotransferase family 2, cytosolic sulfotransferase 2	-1.2473	5.34391	-6.29741	1.02374e-05	0.000680209	3.6271	777793
13221945	BC142812	cnga3a	cyclic nucleotide gated channel alpha 3a	-1.96976	5.42551	-6.29521	1.02794e-05	0.000681263	3.62306	567242
13081404	NM_001171028	lppr3a	lipid phosphate phosphatase-related protein type 3a	0.957141	7.27443	6.28406	1.04948e-05	0.000693775	3.60261	NA
13046802	XM_682226	dhx32	DEAH (Asp-Glu-Ala-His) box polypeptide 32	0.771373	6.56148	6.28133	1.05483e-05	0.000695546	3.59759	NA
13127065	DQ016494	ahr1b	aryl hydrocarbon receptor 1b	-1.22859	6.26537	-6.2703	1.07674e-05	0.000708203	3.57731	554265
12987093	XM_001919775	LOC100150043	rap1 GTPase-GDP dissociation stimulator 1-A-like	-0.867379	5.11996	-6.26003	1.09756e-05	0.000718268	3.55842	NA
13184809	ENSDART00000009653	LOC571208	potassium voltage-gated channel subfamily A member 1-like	-1.03807	6.19578	-6.26092	1.09572e-05	0.000718268	3.56008	NA
13266998	NM_001045137	stxbp5l	syntaxin binding protein 5-like	-1.06218	6.95694	-6.25826	1.10117e-05	0.000718826	3.55518	567605
13162918	BC129328	zgc:158624	zgc:158624	-0.760394	6.06604	-6.24828	1.12187e-05	0.000727994	3.53681	NA
13218177	XM_002662271	LOC100329473	girdin-like	-1.03928	5.28256	-6.24948	1.11936e-05	0.000727994	3.53902	NA
13134490	DQ372947	cacnb3b	calcium channel, voltage-dependent, beta 3b	-1.09702	5.84527	-6.24746	1.1236e-05	0.000727994	3.53529	559015
13005170	BC065940	trim9	tripartite motif-containing 9	-0.8614	6.61755	-6.24603	1.1266e-05	0.000728126	3.53266	336099
13245734	AY151254	mmp9	matrix metalloproteinase 9	2.90144	6.26203	6.23261	1.1552e-05	0.000739272	3.50793	406397
13226155	XM_001336845	ntrk3b	neurotrophic tyrosine kinase, receptor, type 3b	-0.995557	7.12557	-6.23347	1.15336e-05	0.000739272	3.5095	798577
13009533	BC115078	gabrb2	gamma-aminobutyric acid (GABA) A receptor, beta 2	-1.12094	5.81053	-6.23369	1.15288e-05	0.000739272	3.50991	336252
13012116	BC049482	rom1b	retinal outer segment membrane protein 1b	-2.36242	5.82148	-6.23523	1.14956e-05	0.000739272	3.51276	393989
13120746	NM_001089420	si:ch211-11p18.4	si:ch211-11p18.4	-0.761212	6.23247	-6.23004	1.16078e-05	0.000741018	3.50318	NA
13276322	XM_001343723	LOC100004458	protocadherin-23-like	-1.14048	5.38852	-6.22334	1.17539e-05	0.000748516	3.49083	NA
13163219	XM_002666920	LOC100332815	uncharacterized LOC100332815	1.14319	9.65962	6.21856	1.18595e-05	0.000753395	3.48201	NA
13238161	XM_689046	LOC565776	sodium-dependent noradrenaline transporter-like	-0.832696	5.22827	-6.21302	1.19831e-05	0.000759398	3.47178	NA
12953877	BC076266	camk2d2	calcium/calmodulin-dependent protein kinase (CaM kinase) II delta 2	-1.15719	8.15713	-6.20926	1.20677e-05	0.000762899	3.46484	436815
13160109	AB427148	camk1db	calcium/calmodulin-dependent protein kinase 1Db	-0.995777	5.93057	-6.19848	1.23139e-05	0.000776582	3.44491	791176
13116794	XM_001337469	LOC100001904	cyclin-J-like	0.895602	7.33314	6.19439	1.24086e-05	0.000780662	3.43735	NA
12992710	XM_003199631	sema4g	sema domain, immunoglobulin domain (Ig), transmembrane domain (TM) and short cytoplasmic domain, (semaphorin) 4G	-0.708624	3.85248	-6.17728	1.28133e-05	0.000804182	3.40568	NA
13121011	BC139627	atrip	ATR interacting protein	0.694917	5.4148	6.16373	1.31432e-05	0.000822906	3.38059	558534
13286250	XM_686609	LOC563243	histone H3.2-like	1.24275	9.72301	6.16235	1.31775e-05	0.000823073	3.37802	NA
13131320	XM_002667560	nup210	nucleoporin 210	0.963593	6.75832	6.1566	1.33205e-05	0.000825253	3.36737	570945
13203637	XM_690528	si:dkeyp-20g2.3	si:dkeyp-20g2.3	0.833673	6.25698	6.1588	1.32657e-05	0.000825253	3.37144	567236
13271345	XM_003201716	LOC100534722	RNA-binding protein MEX3D-like	0.764829	8.39787	6.15586	1.33392e-05	0.000825253	3.36599	100534722
12945997	XM_001919516	micu3a	mitochondrial uptake family, member 3a	-0.908061	5.92005	-6.15797	1.32864e-05	0.000825253	3.3699	559552
13282364	BC074030	abca4a	ATP-binding cassette, sub-family A (ABC1), member 4a	-1.12315	5.22915	-6.15267	1.34193e-05	0.000828247	3.36008	798993
13237032	BC162154	nrn1lb	neuritin 1-like b	-1.51072	6.57212	-6.15011	1.3484e-05	0.000830268	3.35533	568997
13176494	BC045858	coil	coilin p80	0.762459	5.04707	6.14851	1.35247e-05	0.000830814	3.35236	58024
12974889	XM_001923942	LOC100151589	probable glutamate receptor-like	-1.22567	4.31736	-6.14713	1.35599e-05	0.000831015	3.34979	NA
13093126	XR_117607	si:ch211-243a15.1	si:ch211-243a15.1	-0.845492	6.80754	-6.14321	1.36603e-05	0.000833245	3.34251	100005033
13279120	XM_001922246	grip2b	glutamate receptor interacting protein 2b	-0.945825	5.56693	-6.14337	1.3656e-05	0.000833245	3.34282	562290
13112221	XM_003200903	LOC100536041	gamma-aminobutyric acid receptor subunit beta-2-like	-1.27516	5.19484	-6.13527	1.38657e-05	0.000843802	3.32778	100536041
12990824	FJ232032	nptx2b	neuronal pentraxin 2b	-1.09481	4.68232	-6.1335	1.39121e-05	0.000844647	3.32449	556906
13219607	BC076192	faimb	Fas apoptotic inhibitory molecule b	-2.61304	6.67419	-6.13171	1.39591e-05	0.000845529	3.32116	436668
13070114	NM_001144043	gabbr2	gamma-aminobutyric acid (GABA) B receptor, 2	-0.893344	6.89733	-6.13031	1.39959e-05	0.000845794	3.31856	560267
13170506	BC045506	ppan	peter pan homolog (Drosophila)	1.20398	6.01739	6.12791	1.40593e-05	0.000847659	3.3141	317739
13084789	AF115773	neurod6b	neurogenic differentiation 6b	-0.883821	6.74745	-6.12449	1.41501e-05	0.000851161	3.30774	114415
13077260	DQ858216	sesn2	sestrin 2	1.29435	6.92525	6.12168	1.42252e-05	0.00085371	3.30252	100149745
13304984	BC155566	si:ch211-119o8.7	si:ch211-119o8.7	-2.72989	5.64342	-6.11799	1.43246e-05	0.000857698	3.29564	100141334
13283930	BC162485	zgc:193593	zgc:193593	-2.06867	5.06936	-6.11565	1.43877e-05	0.000859502	3.2913	564090
12958499	DQ020259	il15	interleukin 15	-0.712492	5.71959	-6.11029	1.4534e-05	0.00086625	3.28132	654826
13029200	BC134955	zgc:162301	zgc:162301	1.27004	6.53874	6.10023	1.48125e-05	0.000871605	3.26259	NA
13200710	BC151909	setd8b	SET domain containing (lysine methyltransferase) 8b	0.78277	5.33875	6.10113	1.47871e-05	0.000871605	3.26428	100004770
13272842	XM_003201759	pde1c	phosphodiesterase 1C, calmodulin-dependent 70kDa	-1.13367	6.08583	-6.09875	1.48536e-05	0.000871605	3.25984	NA
12954927	DQ822507	chrna6	cholinergic receptor, nicotinic, alpha 6	-1.33906	4.79934	-6.0986	1.48581e-05	0.000871605	3.25955	555747
13168789	XM_686547	LOC563178	mpv17-like protein-like	-1.38626	4.73947	-6.10536	1.46696e-05	0.000871605	3.27215	NA
13217387	ENSDART00000114146	NECAB3	N-terminal EF-hand calcium binding protein 3	-1.43797	7.33599	-6.10098	1.47915e-05	0.000871605	3.26398	NA
12997815	XM_693199	LOC569792	uncharacterized LOC569792	-2.22913	7.58608	-6.09898	1.48472e-05	0.000871605	3.26027	NA
13124914	AY648821	bysl	bystin-like	1.09934	7.00567	6.09451	1.49732e-05	0.000876387	3.25193	394081
13060157	BC090480	baz1b	bromodomain adjacent to zinc finger domain, 1B	0.850687	7.90056	6.08534	1.52347e-05	0.000887369	3.23484	571727
13181366	AY301281	cntn1b	contactin 1b	-1.10781	6.04663	-6.08435	1.5263e-05	0.000887369	3.233	541474
13199479	XM_001345351	doc2b	double C2-like domains, beta	-1.11413	7.73535	-6.0851	1.52415e-05	0.000887369	3.2344	100006713
13159293	XM_003201376	LOC100536263	general transcription factor IIH subunit 1-like	0.670866	6.60655	6.08271	1.53105e-05	0.000887695	3.22994	NA
13022251	XM_684948	LOC561540	glutamate receptor, ionotropic kainate 1-like	-1.08606	5.33049	-6.0818	1.53368e-05	0.000887695	3.22824	NA
13283996	BC163117	kctd16a	potassium channel tetramerisation domain containing 16a	-1.19082	5.98364	-6.08001	1.53889e-05	0.000888042	3.2249	567207
13258697	BC142898	tmem237a	transmembrane protein 237a	-1.22765	5.1149	-6.07925	1.5411e-05	0.000888042	3.22348	557237
13135355	JN680266	zgc:56699	zgc:56699	0.841553	5.2486	6.07454	1.55486e-05	0.000893994	3.2147	405758
13084186	XR_084488	si:dkeyp-51f11.3	si:dkeyp-51f11.3	-0.811448	5.10785	-6.07328	1.55859e-05	0.000894166	3.21234	NA
13285366	FM986821	smg1	PI-3-kinase-related kinase SMG-1	0.943896	7.46203	6.06916	1.57078e-05	0.000899177	3.20465	569810
13144268	NM_001199738	topbp1	topoisomerase (DNA) II binding protein 1	0.920475	5.3611	6.06342	1.5879e-05	0.000901057	3.19394	407679
13163596	XR_082678	LOC570430	AFG3-like protein 1-like	0.838004	6.46443	6.0652	1.58259e-05	0.000901057	3.19725	NA
13061849	BC059691	cd9a	CD9 antigen (p24) a	-0.900375	6.54277	-6.06352	1.58762e-05	0.000901057	3.19412	322455
12965448	XM_001923224	LOC100148888	leucine-rich repeat-containing protein C22orf36-like	-1.19615	6.37197	-6.06401	1.58616e-05	0.000901057	3.19503	NA
13215953	BC155332	cadpsb	Ca2+-dependent activator protein for secretion b	-0.85545	7.16641	-6.05641	1.60913e-05	0.000911117	3.18083	100001129
13079785	XM_678031	abca4b	ATP-binding cassette, sub-family A (ABC1), member 4b	-1.30577	5.21728	-6.05427	1.61565e-05	0.000912822	3.17684	555506
13242511	ENSDART00000081421	SMYD1B	---	1.56507	7.19934	6.05186	1.62303e-05	0.000915011	3.17234	NA
13225434	XM_001336913	LOC100004336	uncharacterized LOC100004336	1.09108	8.99925	6.04513	1.64386e-05	0.000921633	3.15975	NA
13000801	XM_001921387	xpo5	exportin 5	0.791876	6.86654	6.04373	1.64824e-05	0.000921633	3.15712	558662
13118645	BC060673	zgc:66125	zgc:66125	0.70686	5.76428	6.04451	1.64581e-05	0.000921633	3.15858	NA
13022958	XM_001336431	LOC100002104	complement C1q-like protein 4-like	-1.41668	6.27442	-6.0435	1.64893e-05	0.000921633	3.15671	NA
13043083	XM_002666957	LOC100332237	thrombospondin-1-like	0.93825	6.38802	6.03529	1.6748e-05	0.000934088	3.14134	NA
13231072	U14590	ascl1b	achaete-scute complex-like 1b (Drosophila)	0.880268	6.13755	6.03372	1.67979e-05	0.000934529	3.1384	30478
13018511	EU182353	cadm2b	cell adhesion molecule 2b	-1.1794	5.67942	-6.03279	1.68277e-05	0.000934529	3.13665	571698
12944030	BC124176	cenpe	centromere protein E	0.749881	6.28812	6.02673	1.70221e-05	0.000943317	3.12531	767754
13038838	XM_688922	bcl3	B-cell CLL/lymphoma 3	1.53804	4.59799	6.01528	1.73959e-05	0.000958812	3.10386	565656
13282462	BC076481	kdm8	lysine (K)-specific demethylase 8	1.32664	5.27491	6.00925	1.75963e-05	0.000958812	3.09255	436936
13207629	XR_117688	LOC100538174	uncharacterized LOC100538174	0.896281	7.66251	6.01598	1.73728e-05	0.000958812	3.10517	NA
13100635	NM_001172565	ak7a	adenylate kinase 7a	0.695869	5.44437	6.0106	1.75513e-05	0.000958812	3.09508	402854
13061864	BC163570	myo7aa	myosin VIIAa	-0.768899	5.39583	-6.01402	1.74376e-05	0.000958812	3.1015	252846
13040082	XM_687158	faxcb	failed axon connections homolog b (Drosophila)	-0.845317	6.6104	-6.01063	1.75501e-05	0.000958812	3.09514	563796
13202092	AY257178	rtn4r	reticulon 4 receptor	-0.996751	6.50763	-6.01327	1.74626e-05	0.000958812	3.10008	403306
13085946	AY646886	rpe65a	retinal pigment epithelium-specific protein 65a	-2.3148	7.02681	-6.00926	1.75959e-05	0.000958812	3.09257	393724
13273077	BC135088	zgc:162999	zgc:162999	-1.56206	6.31931	-6.00654	1.7687e-05	0.000961747	3.08747	100038772
13137918	XM_003201175	LOC100536821	myelin transcription factor 1-like	1.04616	8.60797	5.99975	1.79167e-05	0.000968169	3.07473	NA
13086937	NM_001100074	bcl6ab	B-cell CLL/lymphoma 6a, genome duplicate b	0.758197	5.82758	6.00137	1.78619e-05	0.000968169	3.07775	100001936
13228075	BC095884	mtmr1a	myotubularin related protein 1a	-0.852348	6.69841	-5.99981	1.79149e-05	0.000968169	3.07483	553750
13053071	EU380906	ltk	leukocyte tyrosine kinase	-0.688767	6.08649	-5.99655	1.8026e-05	0.000972059	3.06873	564470
13034359	ENSDART00000129434	OXR1 (3 of 3)	oxidation resistance 1	-1.05126	6.39865	-5.99338	1.81351e-05	0.000975923	3.06277	NA
13036326	XM_687081	adcy2a	adenylate cyclase 2a	-0.784987	5.63162	-5.98805	1.83199e-05	0.000983836	3.05275	563724
13301366	XM_680072	LOC557091	serine/threonine-protein kinase WNK4-like	-1.08607	6.63513	-5.9869	1.836e-05	0.000983962	3.05059	NA
13179081	EU201184	foxj1a	forkhead box J1a	0.985218	4.74328	5.97844	1.86578e-05	0.000992418	3.0347	767737
13100291	BC134091	tmem244	transmembrane protein 244	-1.12227	5.45906	-5.97809	1.86702e-05	0.000992418	3.03404	556137
12945089	ENSDART00000054989	FSCN1 (2 of 2)	fascin homolog 1, actin-bundling protein (Strongylocentrotus purpuratus)	-1.26874	5.36957	-5.98023	1.85946e-05	0.000992418	3.03805	NA
12975315	BC076183	rs1	retinoschisis (X-linked, juvenile) 1	-3.06307	7.14582	-5.98059	1.85818e-05	0.000992418	3.03873	NA
13275537	XM_002667469	LOC100330667	calsenilin-like	-1.37798	6.3028	-5.97684	1.87147e-05	0.000992756	3.0317	NA
12993029	XM_003199638	LOC100537012	brain-specific angiogenesis inhibitor 1-associated protein 2-like	-0.952187	6.59842	-5.97568	1.87563e-05	0.000992939	3.0295	NA
13169549	XM_001919004	LOC562570	extracellular leucine-rich repeat and fibronectin type-III domain-containing protein 1-like	-1.0685	6.07237	-5.97015	1.89549e-05	0.00100142	3.0191	NA
12948067	GQ489195	nlgn4a	neuroligin 4a	-0.964554	6.93555	-5.96879	1.90039e-05	0.00100197	3.01655	561122
12987372	ENSDART00000129888	LOC100537256	5-azacytidine-induced protein 1-like	1.34324	5.90965	5.96165	1.92642e-05	0.00101365	3.00311	NA
13300710	XM_001919331	LOC100151486	insulin-like growth factor-binding protein complex acid labile subunit-like	-1.48182	4.94909	-5.96012	1.93206e-05	0.00101457	3.00023	100151486
13283742	BC154834	olig3	oligodendrocyte transcription factor 3	1.29672	5.13946	5.95875	1.93708e-05	0.00101478	2.99766	566728
13260395	AF117387	fzd5	frizzled homolog 5	0.774561	6.27719	5.95789	1.94026e-05	0.00101478	2.99604	30364
13272176	ENSDART00000006960	zgc:56407	zgc:56407	0.723557	5.87086	5.95135	1.96462e-05	0.00102546	2.98372	NA
13221421	XM_677888	adcyap1r1	adenylate cyclase activating polypeptide 1 (pituitary) receptor type I	-1.19835	6.15604	-5.94878	1.97427e-05	0.00102843	2.97888	NA
13249287	BC162651	nr6a1a	nuclear receptor subfamily 6, group A, member 1a	0.982386	5.55489	5.94724	1.98008e-05	0.00102941	2.97598	30506
13167856	BC076166	syt5a	synaptotagmin Va	-1.97742	5.72224	-5.94551	1.98663e-05	0.00103075	2.97272	436686
12980732	XM_678952	LOC556199	phosphorylase b kinase regulatory subunit alpha, liver isoform-like	-0.739629	6.91111	-5.94442	1.99077e-05	0.00103085	2.97066	NA
13304390	ENSDART00000064400	si:ch211-113a14.24	si:ch211-113a14.24	0.843133	8.72467	5.94291	1.99651e-05	0.00103177	2.96782	573073
13013846	BC125936	irg1l	immunoresponsive gene 1, like	1.65025	5.08321	5.94154	2.00175e-05	0.00103243	2.96523	562007
13275125	ENSDART00000129419	NPTN (2 of 3)	neuroplastin	-1.00859	7.98904	-5.93762	2.01677e-05	0.00103812	2.95784	NA
13020520	NM_001037370	tsr1	TSR1, 20S rRNA accumulation, homolog (yeast)	1.13372	6.55262	5.92923	2.04932e-05	0.00105072	2.94203	325037
13282186	AY457141	sp8b	sp8 transcription factor b	0.824869	6.29236	5.9299	2.04673e-05	0.00105072	2.94328	324931
12963923	AF538326	robo4	roundabout homolog 4	0.731894	6.21692	5.92633	2.06072e-05	0.00105449	2.93655	560765
12948712	NM_001201544	wdr17	WD repeat domain 17	-0.82699	5.25325	-5.92441	2.06828e-05	0.00105628	2.93293	561804
13260138	XM_684284	si:ch211-260b17.8	si:ch211-260b17.8	-0.759717	7.20194	-5.92248	2.07594e-05	0.00105812	2.92928	NA
13177764	DQ812989	hs3st4	heparan sulfate (glucosamine) 3-O-sulfotransferase 4	-1.21517	4.93749	-5.91954	2.08761e-05	0.00106199	2.92374	563570
13099797	XM_002665819	LOC100334245	protein pellino homolog 2-like	1.1289	8.34703	5.91716	2.09716e-05	0.0010627	2.91924	100334245
13008758	AB006085	spon2b	spondin 2b, extracellular matrix protein	-1.12828	5.64871	-5.91728	2.09666e-05	0.0010627	2.91947	30202
13253860	AF306854	cebpb	CCAAT/enhancer binding protein (C/EBP), beta	1.25399	6.6912	5.90661	2.1399e-05	0.00107884	2.8993	140814
13280410	ENSDART00000025428	epha2	eph receptor A2	1.15134	6.14158	5.90623	2.14143e-05	0.00107884	2.8986	NA
13016951	BC045900	gar1	GAR1 ribonucleoprotein homolog (yeast)	0.997526	5.6837	5.90633	2.14105e-05	0.00107884	2.89877	393950
13214782	BC092767	rgs16	regulator of G-protein signaling 16	-1.92463	5.33599	-5.90068	2.1643e-05	0.00108825	2.8881	569828
13105304	BC054589	cx32.3	connexin 32.3	-1.71327	4.61016	-5.89918	2.17051e-05	0.00108927	2.88527	322617
13004704	XM_003199736	btbd3b	BTB (POZ) domain containing 3b	-0.788906	5.85836	-5.89698	2.17968e-05	0.00109108	2.88111	562593
13231136	XM_693550	LOC570112	serine incorporator 4-like	-1.0469	6.28335	-5.89631	2.1825e-05	0.00109108	2.87984	NA
13287962	EU070918	ehmt2	euchromatic histone-lysine N-methyltransferase 2	1.13099	7.58194	5.88731	2.22044e-05	0.00110581	2.86281	569250
13285546	ENSDART00000081883	enpp4	ectonucleotide pyrophosphatase/phosphodiesterase 4	-0.875844	8.688	-5.88763	2.21908e-05	0.00110581	2.86341	550586
12945439	XM_002660377	LOC100334711	cyclic nucleotide-gated cation channel alpha-3-like	-1.30193	4.23846	-5.88291	2.2392e-05	0.00111302	2.85449	100334711
13232167	ENSDART00000148038	LRFN4 (1 of 2)	leucine rich repeat and fibronectin type III domain containing 4	-0.900384	6.76715	-5.88098	2.24752e-05	0.00111502	2.85083	NA
12989917	BC098614	tut1	terminal uridylyl transferase 1, U6 snRNA-specific	0.810559	5.23074	5.87796	2.26057e-05	0.00111937	2.84511	564388
13056601	NM_001128576	lepa	leptin a	1.01217	3.60746	5.87392	2.27813e-05	0.00112379	2.83747	100150233
12987742	ENSDART00000127422	BX571792.1	---	-0.783823	5.97133	-5.874	2.27779e-05	0.00112379	2.83762	NA
13202926	BC163479	ankle2	ankyrin repeat and LEM domain containing 2	0.758758	6.18726	5.87203	2.28641e-05	0.00112574	2.83388	559297
13200498	XM_002662191	LOC100334158	voltage-gated potassium channel subunit beta-3-like	-1.06715	5.51578	-5.87033	2.29387e-05	0.00112729	2.83066	100334158
13065767	XM_002665422	LOC100334443	zinc finger protein 36, C3H1 type-like 1-like	1.42308	6.89085	5.86069	2.33669e-05	0.00114617	2.81239	100334443
13276812	ENSDART00000133188	ca10a	carbonic anhydrase Xa	-1.46854	7.84817	-5.85961	2.34156e-05	0.0011464	2.81034	641327
12987990	XM_003199660	LOC100538024	fatty acid desaturase 6-like	-1.05659	6.1084	-5.85552	2.35999e-05	0.00115325	2.80259	NA
13046929	XM_683811	LOC560410	adenylate cyclase type 8-like	-1.62428	5.49832	-5.85255	2.37352e-05	0.00115769	2.79694	NA
13004087	BC055201	prdm8	PR domain containing 8	1.37755	6.26929	5.84676	2.40007e-05	0.00116627	2.78595	406719
13087131	XM_691470	slc44a5a	solute carrier family 44, member 5a	-0.955783	5.144	-5.84764	2.39599e-05	0.00116627	2.78763	568158
13066239	XM_002667803	LOC100334085	oxysterol-binding protein-related protein 10-like	-0.91572	5.53153	-5.84516	2.40741e-05	0.00116766	2.78293	100334085
12996006	NM_001159828	slc4a11	solute carrier family 4, sodium borate transporter, member 11	-0.638644	5.44479	-5.84227	2.42082e-05	0.00117198	2.77745	559346
13302848	XM_001334767	LOC794779	collagen alpha-4(VI) chain-like	-1.92642	5.42538	-5.83608	2.44982e-05	0.00118382	2.76568	NA
13052384	BC076514	rcan3	regulator of calcineurin family member 3	-0.852449	5.85776	-5.832	2.46912e-05	0.00119094	2.75793	325356
13137326	ENSDART00000122432	FNDC7 (5 of 7)	fibronectin type III domain containing 7	-1.17341	6.07979	-5.83074	2.4751e-05	0.00119162	2.75554	NA
13301242	XM_002660982	LOC100331115	uncharacterized LOC100331115	0.912441	8.13173	5.82157	2.51917e-05	0.0012099	2.7381	NA
13001630	BC097231	si:dkey-33c12.3	si:dkey-33c12.3	-1.09393	6.07425	-5.82091	2.52236e-05	0.0012099	2.73685	335380
13044372	CU468768	sc:d0343	sc:d0343	-0.824078	6.81526	-5.81724	2.54021e-05	0.00121622	2.72988	NA
12945504	XM_001337800	si:dkey-26i13.8	si:dkey-26i13.8	-0.903632	4.8495	-5.81593	2.54665e-05	0.00121707	2.72738	797363
13048649	ENSDART00000121787	nol10	nucleolar protein 10	1.86783	9.10459	5.81438	2.55423e-05	0.00121744	2.72444	393206
13264066	XM_682568	si:dkey-15i8.3	si:dkey-15i8.3	0.95529	5.73197	5.81299	2.56108e-05	0.00121744	2.7218	NA
13261408	XM_003199236	si:ch211-269e2.1	si:ch211-269e2.1	-0.701544	6.16219	-5.81292	2.56145e-05	0.00121744	2.72165	100537961
13071575	BC124340	utp18	UTP18 small subunit (SSU) processome component homolog (yeast)	0.9305	6.51416	5.81011	2.57533e-05	0.0012218	2.71631	767797
13050391	AF091594	snap25b	synaptosome-associated protein 25b	-1.59651	7.152	-5.80204	2.61572e-05	0.00123871	2.70094	30711
13261363	NM_212765	med14	mediator complex subunit 14	0.718716	7.97347	5.79906	2.63076e-05	0.00124231	2.69527	336923
12999787	XM_003199754	LOC100535278	uncharacterized LOC100535278	-1.86044	6.33961	-5.79865	2.63287e-05	0.00124231	2.69448	100535278
13094271	BC081488	ttr	transthyretin (prealbumin, amyloidosis type I)	-1.88015	5.24447	-5.79241	2.66468e-05	0.00125505	2.68261	449556
13114141	BC096789	zgc:109965	zgc:109965	-1.58354	7.19973	-5.79006	2.67679e-05	0.00125848	2.67813	619266
13084238	XM_002660888	si:dkeyp-51f11.8	si:dkeyp-51f11.8	-1.33652	6.30716	-5.78671	2.69417e-05	0.00126437	2.67174	NA
12979914	NM_001045064	hcfc1a	host cell factor C1a	1.02945	8.84503	5.78219	2.71777e-05	0.00127086	2.66312	564853
13033374	AY149121	paqr7b	progestin and adipoQ receptor family member VII, b	-0.844249	6.60299	-5.78246	2.71634e-05	0.00127086	2.66364	368256
13255891	NM_001123245	hes2.1	hairy and enhancer of split 2.1	1.60819	4.38674	5.76901	2.7878e-05	0.00130127	2.63798	559147
13300800	NM_001130801	or109-11	odorant receptor, family D, subfamily 109, member 11	-1.18953	4.5542	-5.76806	2.79291e-05	0.00130132	2.63617	100148220
12955898	BC153965	si:dkey-1h24.2	si:dkey-1h24.2	-1.27609	5.8563	-5.75999	2.83683e-05	0.00131943	2.62075	100137117
13272341	XM_687029	LOC563670	potassium channel subfamily T member 1-like	-0.956575	6.12829	-5.75782	2.84874e-05	0.00132261	2.61661	NA
13231189	BC163473	zgc:194993	zgc:194993	-2.22673	6.42238	-5.75494	2.86462e-05	0.00132762	2.61111	NA
13030153	XM_003200146	LOC100534934	POU domain, class 2, transcription factor 2-like	0.904319	6.27878	5.75324	2.87406e-05	0.00132962	2.60787	NA
13280146	ENSDART00000144508	UNC13BA	---	-1.40678	4.42984	-5.75055	2.88906e-05	0.00133419	2.60272	NA
13081849	BC129335	kcnb2	potassium voltage-gated channel, Shab-related subfamily, member 2	-1.50543	5.41084	-5.74631	2.91284e-05	0.00134279	2.59462	555921
13149077	BC095691	atp6v0a1b	ATPase, H+ transporting, lysosomal V0 subunit a isoform 1b	-1.29646	8.32539	-5.74262	2.93373e-05	0.00135003	2.58756	553691
13163038	XM_002666751	dnaja	DnaJ (Hsp40) homolog, subfamily A member	1.57083	7.4722	5.74134	2.94101e-05	0.00135027	2.58511	373115
12997600	XM_680019	LOC557043	uncharacterized protein C6orf150-like	0.925718	4.48907	5.7407	2.9446e-05	0.00135027	2.5839	NA
13217506	BC066373	zgc:77222	zgc:77222	-0.775503	6.74441	-5.73944	2.95182e-05	0.0013512	2.58148	NA
13019163	XM_691097	LOC567794	putative polypeptide N-acetylgalactosaminyltransferase-like protein 3-like	-0.961741	5.67908	-5.73602	2.97142e-05	0.00135778	2.57494	NA
13224266	ENSDART00000059441	GCNT7	glucosaminyl (N-acetyl) transferase family member 7	-0.991087	5.85324	-5.73486	2.97809e-05	0.00135845	2.57273	NA
13219336	XM_001920668	LOC557095	G protein-activated inward rectifier potassium channel 1-like	-0.982732	5.63956	-5.72919	3.01096e-05	0.00137104	2.56188	NA
13133126	XM_001339095	si:rp71-17i16.4	si:rp71-17i16.4	-2.32312	5.91217	-5.72524	3.03412e-05	0.00137918	2.5543	100002038
12967883	XM_686544	LOC563175	SWI/SNF-related matrix-associated actin-dependent regulator of chromatin subfamily A containing DEAD/H box 1-like	0.733819	7.07827	5.71919	3.06989e-05	0.00139167	2.54272	NA
13103221	BC155639	prph2l	peripherin 2, like	-1.36773	4.83621	-5.71878	3.07231e-05	0.00139167	2.54194	567873
13113296	BC129164	zgc:158228	zgc:158228	0.763896	5.29814	5.71662	3.08518e-05	0.00139508	2.53781	NA
13143446	EF462418	tgfbr1b	transforming growth factor, beta receptor 1 b	0.910365	8.82963	5.7118	3.11415e-05	0.00140574	2.52857	792928
12957631	BC085391	cdadc1	cytidine and dCMP deaminase domain containing 1	-0.652122	5.32292	-5.71049	3.1221e-05	0.00140689	2.52605	492807
13240212	XM_680337	LOC557301	cocaine- and amphetamine-regulated transcript protein-like	1.02127	4.97581	5.70475	3.15701e-05	0.00142016	2.51506	557301
13073294	BC093221	cacng8a	calcium channel, voltage-dependent, gamma subunit 8a	-0.827178	5.58111	-5.70338	3.16542e-05	0.00142149	2.51243	550428
13212575	BC092745	cdk5r2a	cyclin-dependent kinase 5, regulatory subunit 2a (p39)	-0.889522	6.55045	-5.70188	3.17467e-05	0.00142319	2.50955	550231
13272264	ENSDART00000130189	RP1 (2 of 2)	retinitis pigmentosa 1 (autosomal dominant)	-1.8894	5.32296	-5.69962	3.18859e-05	0.00142698	2.50522	NA
13014938	BC076534	pde6a	phosphodiesterase 6A, cGMP-specific, rod, alpha	-1.1079	4.41935	-5.69667	3.20692e-05	0.00143272	2.49956	368410
13135730	BC092923	hoxc4a	homeo box C4a	0.898003	7.32369	5.6924	3.23358e-05	0.00143969	2.49138	30345
13250100	NM_001083004	dhx37	DEAH (Asp-Glu-Ala-His) box polypeptide 37	0.834548	6.63661	5.69324	3.22832e-05	0.00143969	2.49299	100009635
13192075	NM_001100057	LOC796505	putative ATP-dependent RNA helicase DHX33-like	0.951606	6.63909	5.69097	3.24259e-05	0.00144124	2.48863	NA
13062663	AB355649	rfx4	regulatory factor X, 4	0.855663	6.75511	5.68721	3.26636e-05	0.00144911	2.48141	403016
13062858	XM_002665337	LOC100333333	alpha-1,3-mannosyl-glycoprotein 4-beta-N-acetylglucosaminyltransferase C-like	-0.867125	7.03096	-5.68641	3.27144e-05	0.00144911	2.47987	NA
13072344	XM_003200525	LOC100538221	collagen alpha-1(IX) chain-like	-0.970599	8.09934	-5.68549	3.2773e-05	0.00144924	2.4781	100538221
13214238	BC083433	si:dkey-98p3.7	si:dkey-98p3.7	-0.733896	4.59597	-5.682	3.2996e-05	0.00145663	2.4714	NA
13216051	FJ556870	oxtr	oxytocin receptor	-0.71379	6.75975	-5.68105	3.30568e-05	0.00145685	2.46958	100001530
13180143	BC067685	brn1.2	brain POU domain gene 1.2	0.821051	6.13242	5.67974	3.3141e-05	0.00145809	2.46707	NA
12957120	EU642608	odam	odontogenic, ameloblast asssociated	-1.40809	5.24445	-5.67736	3.32948e-05	0.00146239	2.46249	100270760
12972537	XM_682446	LOC559131	serine/threonine-protein kinase NIM1-like	-1.21987	5.22143	-5.67343	3.35502e-05	0.00147113	2.45494	559131
13073499	EF591984	slc9a3.1	solute carrier family 9 (sodium/hydrogen exchanger), member 3.1	0.693162	4.63091	5.67177	3.36583e-05	0.00147339	2.45176	568258
13276122	ENSDART00000111131	elfn1b	extracellular leucine-rich repeat and fibronectin type III domain containing 1b	-0.851537	5.70272	-5.65905	3.45019e-05	0.00150525	2.42729	100144401
12997528	XM_680210	slc24a3	solute carrier family 24 (sodium/potassium/calcium exchanger), member 3	-0.853105	5.70805	-5.65933	3.44827e-05	0.00150525	2.42784	557196
13287826	XM_001920978	thrab	thyroid hormone receptor alpha b	-1.25972	7.95128	-5.65712	3.46316e-05	0.00150839	2.42358	558427
13077273	BC045465	matn1	matrilin 1	-3.56499	8.93498	-5.65613	3.4698e-05	0.00150876	2.42169	403023
13215034	AF241637	negr1	neuronal growth regulator 1	-0.849039	7.55267	-5.65444	3.48124e-05	0.00151117	2.41844	445374
13163513	XM_682733	LOC559395	asc-type amino acid transporter 1-like	-1.6511	5.90231	-5.6536	3.48695e-05	0.00151117	2.41682	NA
13074593	XM_002665561	mbpa	myelin basic protein a	-1.61392	5.62632	-5.65045	3.5084e-05	0.00151793	2.41075	326281
13091361	NM_001080192	oc90	otoconin 90	1.05845	5.59979	5.64821	3.52375e-05	0.00152205	2.40644	568941
13237625	BC047799	kif18a	kinesin family member 18A	0.679606	6.80498	5.64642	3.53605e-05	0.00152483	2.403	393209
13124833	FJ032030	nbl1	neuroblastoma, suppression of tumorigenicity 1	-0.922674	7.26549	-5.64543	3.54288e-05	0.00152525	2.40109	404629
13055171	XM_002662226	LOC100330554	gamma-aminobutyric acid receptor subunit rho-1-like	-0.871736	6.20482	-5.64311	3.55892e-05	0.00152711	2.39662	100330554
13056375	BC074090	impdh1a	inosine 5-phosphate dehydrogenase 1a	-1.0761	6.05211	-5.64393	3.55324e-05	0.00152711	2.3982	431724
13224646	XM_002662601	LOC100333859	uncharacterized LOC100333859	1.62445	5.86435	5.63393	3.62314e-05	0.00154781	2.37894	NA
12988226	BC085589	lrrc20	leucine rich repeat containing 20	0.829342	6.37078	5.62999	3.65109e-05	0.00154781	2.37135	492485
12944206	XM_003197607	LOC792623	uncharacterized LOC792623	0.755861	5.05564	5.63222	3.63523e-05	0.00154781	2.37565	NA
12991660	GQ925717	opn4b	opsin 4b	-0.950177	5.98533	-5.6312	3.64247e-05	0.00154781	2.37369	100884131
13087885	NM_001128369	LOC100006660	lipid phosphate phosphatase-related protein type 5-like	-1.03201	4.34501	-5.63071	3.64593e-05	0.00154781	2.37275	NA
12968749	XM_001924003	grik1a	glutamate receptor, ionotropic, kainate 1a	-1.03341	5.86674	-5.63356	3.62575e-05	0.00154781	2.37823	798001
13109551	XM_679910	pde6b	phosphodiesterase 6B, cGMP-specific, rod, beta	-1.20205	4.29194	-5.62865	3.66065e-05	0.00154781	2.36876	559332
12967784	BC128792	atp8b5b	ATPase, class I, type 8B, member 5b	-1.35156	6.15575	-5.63352	3.62603e-05	0.00154781	2.37816	563450
13152950	XM_002666721	LOC100331980	vesicular glutamate transporter 1-like	-1.57425	6.73729	-5.62937	3.65546e-05	0.00154781	2.37017	NA
12950021	ENSDART00000124833	pdcd11	programmed cell death 11	1.16651	7.14475	5.61461	3.76229e-05	0.00158821	2.34169	794079
13022906	XM_003199979	LOC100534897	protein KIAA1731-like	0.797488	6.46047	5.61348	3.77057e-05	0.00158913	2.33952	NA
13231472	AF365874	ccnd1	cyclin D1	1.13247	8.99145	5.60844	3.80787e-05	0.00160226	2.32979	30222
13181940	AF268051	igf1	insulin-like growth factor 1	-0.69962	4.90663	-5.60652	3.82218e-05	0.00160569	2.32608	114433
13073447	XM_003200549	il11b	interleukin 11b	2.98647	4.49728	5.6047	3.83574e-05	0.0016062	2.32258	641287
13185230	BC065987	rtcb	RNA 2,3-cyclic phosphate and 5-OH ligase	0.97952	6.90376	5.60479	3.83511e-05	0.0016062	2.32274	406376
13082399	GQ925716	opn4.1	opsin 4.1	-1.3014	5.95026	-5.60346	3.84506e-05	0.00160752	2.32018	352918
12955824	BC047817	pwp2h	PWP2 periodic tryptophan protein homolog (yeast)	0.961854	6.54883	5.59515	3.90798e-05	0.00163121	2.30414	266990
12946889	NM_001256205	ncapg	non-SMC condensin I complex, subunit G	1.4087	7.72469	5.59344	3.92109e-05	0.00163406	2.30082	492707
13277584	ENSDART00000138701	zgc:92763	zgc:92763	-0.902645	5.68027	-5.59196	3.93246e-05	0.0016361	2.29796	NA
13161195	XM_001340183	LOC799915	uncharacterized LOC799915	-1.60551	5.56735	-5.59116	3.93855e-05	0.0016361	2.29643	NA
13285744	AB512277	syn2b	synapsin IIb	-1.14139	6.67197	-5.58842	3.95976e-05	0.00164229	2.29112	641578
13258489	BC077155	cdk5r2b	cyclin-dependent kinase 5, regulatory subunit 2b	-1.35153	5.02267	-5.58647	3.97485e-05	0.00164593	2.28736	445114
13021819	XM_001341900	masp1	mannan-binding lectin serine peptidase 1 (C4/C2 activating component of Ra-reactive factor)	1.02987	5.48497	5.58481	3.98777e-05	0.00164866	2.28416	100002060
12981790	XM_001339301	LOC798927	uncharacterized LOC798927	1.95632	5.66432	5.58208	4.00916e-05	0.00165488	2.27887	NA
13199492	XM_003198710	LOC100536508	uncharacterized LOC100536508	1.40551	6.61928	5.5759	4.05792e-05	0.00166569	2.26692	NA
13285172	JN786913	lama2	laminin, alpha 2	1.06054	8.78112	5.57529	4.06276e-05	0.00166569	2.26574	100049705
13025056	AF146429	dlc	deltaC	1.04205	7.5104	5.57357	4.07642e-05	0.00166569	2.26242	30120
13279260	NM_001128390	LOC100149066	hairy-related 4.2-like	1.03035	8.60516	5.57311	4.08012e-05	0.00166569	2.26152	NA
12972379	BC168468	zgc:172302	zgc:172302	-0.986359	5.0452	-5.57785	4.04244e-05	0.00166569	2.27069	561460
13224198	XM_695908	LOC572215	solute carrier family 12 member 5-like	-1.10118	7.57171	-5.57385	4.07419e-05	0.00166569	2.26296	NA
12960970	XM_695179	si:dkeyp-35f12.3	si:dkeyp-35f12.3	-1.21697	5.0583	-5.57383	4.07438e-05	0.00166569	2.26292	NA
13223212	AY299514	rbm19	RNA binding motif protein 19	0.933068	5.76209	5.56969	4.10754e-05	0.00167426	2.2549	387255
13031176	XM_002664863	LOC100330359	transmembrane protein 196-like	-0.899341	5.86651	-5.56864	4.11595e-05	0.00167506	2.25288	NA
13091217	BC076521	slc25a36a	solute carrier family 25, member 36a	-0.886635	7.91457	-5.56736	4.1263e-05	0.00167665	2.2504	436940
13247910	NM_001045385	gck	glucokinase (hexokinase 4, maturity onset diabetes of the young 2)	-1.53186	5.35597	-5.56596	4.1376e-05	0.00167863	2.2477	751668
13260614	BC083291	cmss1	cms1 ribosomal small subunit homolog (yeast)	0.774594	4.85715	5.56414	4.15239e-05	0.00168201	2.24417	450027
13023216	XM_001341012	dock10	dedicator of cytokinesis 10	-0.642906	6.12697	-5.55635	4.21627e-05	0.00170322	2.22908	100000949
12978310	BC044144	krt15	keratin 15	-1.3866	6.52176	-5.55616	4.21783e-05	0.00170322	2.22871	406844
13283366	BC134108	zgc:162825	zgc:162825	-1.72582	8.94813	-5.55474	4.22959e-05	0.00170532	2.22596	NA
13178139	BC077119	dnajb1a	DnaJ (Hsp40) homolog, subfamily B, member 1a	0.780634	6.66757	5.55004	4.26869e-05	0.00171843	2.21686	445177
13026124	XM_677725	LOC555258	multidrug and toxin extrusion protein 1-like	-0.769359	5.30851	-5.54801	4.28571e-05	0.00172262	2.21293	NA
13121287	BC048886	ccnt2b	cyclin T2b	0.666118	8.23474	5.54501	4.31101e-05	0.00173012	2.20711	321464
13101501	BC124746	scrn2	secernin 2	-0.592745	5.93741	-5.54179	4.3383e-05	0.00173306	2.20087	558306
13173818	XM_687176	LOC563812	tripartite motif-containing protein 35-like	-0.952683	5.24939	-5.54182	4.33807e-05	0.00173306	2.20092	NA
13280646	XM_683405	ntng2a	netrin g2a	-1.21512	7.21202	-5.54269	4.33062e-05	0.00173306	2.20262	560014
13097124	AY583215	mycn	v-myc myelocytomatosis viral related oncogene, neuroblastoma derived (avian)	0.905871	6.50247	5.53667	4.38204e-05	0.00174785	2.19095	252851
13063046	AF342739	bbs2	Bardet-Biedl syndrome 2	-0.657294	5.88412	-5.53566	4.39074e-05	0.00174864	2.18899	259187
13283494	BC150432	zgc:173585	zgc:173585	0.960189	8.3537	5.53393	4.40568e-05	0.00175191	2.18563	100124605
13159363	BC142801	LOC572121	inner centromere protein A-like	0.851911	6.81413	5.53198	4.42256e-05	0.00175595	2.18185	NA
12977184	ENSDART00000121537	AL935272.2	---	-0.81925	6.48092	-5.52927	4.44618e-05	0.00175879	2.17659	NA
13182544	BC076355	syt1a	synaptotagmin Ia	-0.906774	7.99768	-5.52883	4.44998e-05	0.00175879	2.17574	436736
13288390	ENSDART00000145218	zgc:171482	zgc:171482	-0.984584	6.9929	-5.5302	4.4381e-05	0.00175879	2.17839	796610
13047280	DQ501275	plekhh1	pleckstrin homology domain containing, family H (with MyTH4 domain) member 1	0.75943	6.47743	5.52162	4.51348e-05	0.00176513	2.16174	565914
13158582	AY512587	irx5b	iroquois homeobox protein 5b	0.757243	6.68421	5.52253	4.5054e-05	0.00176513	2.16351	405792
13225704	BC085450	snrpa1	small nuclear ribonucleoprotein polypeptide A	0.692241	6.56815	5.52257	4.50506e-05	0.00176513	2.16358	492511
13166310	XM_691254	crhr1	corticotropin releasing hormone receptor 1	-0.830133	5.97041	-5.52528	4.48112e-05	0.00176513	2.16885	567940
13036765	XM_678194	LOC555627	calsyntenin-3-like	-0.875132	7.97912	-5.52244	4.50616e-05	0.00176513	2.16334	NA
13093257	XM_001919172	lingo3	leucine rich repeat and Ig domain containing 3	-1.05133	7.95089	-5.5222	4.50828e-05	0.00176513	2.16287	NA
13172275	XM_001922038	evplb	envoplakin b	-1.19525	7.06228	-5.52239	4.50661e-05	0.00176513	2.16324	793139
13285250	ENSDART00000115210	ANO9A	---	0.977168	8.95055	5.51927	4.53428e-05	0.00176748	2.15719	NA
13124101	ENSDART00000134281	slit1b	slit homolog 1b (Drosophila)	0.80692	6.07175	5.51865	4.53982e-05	0.00176748	2.15598	561685
13263398	FJ208849	drd1b	dopamine receptor D1b	-1.2596	4.98331	-5.5189	4.5376e-05	0.00176748	2.15647	568126
12949457	BC142838	zgc:165520	zgc:165520	-1.30938	4.93642	-5.51761	4.54913e-05	0.00176846	2.15396	571872
13192597	AY648744	mybbp1a	MYB binding protein (P160) 1a	1.36923	6.9837	5.51456	4.57644e-05	0.00177198	2.14804	321277
13157720	AY648745	ticrr	TopBP1-interacting, checkpoint, and replication regulator	0.688311	5.50495	5.51432	4.57859e-05	0.00177198	2.14758	445411
13150622	XM_003201304	atp8a2	ATPase, aminophospholipid transporter-like, class I, type 8A, member 2	-0.673508	7.63169	-5.5148	4.57429e-05	0.00177198	2.1485	100330943
12975295	AB489227	cdkl5	cyclin-dependent kinase-like 5	-0.897851	6.19784	-5.51287	4.59169e-05	0.00177343	2.14475	559341
13276210	ENSDART00000138355	SI:DKEY-26I13.8	---	-1.17326	4.86461	-5.5124	4.59597e-05	0.00177343	2.14383	NA
13007870	BC076282	nme5	non-metastatic cells 5, protein expressed in (nucleoside-diphosphate kinase)	0.794726	5.72535	5.50865	4.62992e-05	0.00178386	2.13656	436789
13276428	ENSDART00000139937	FRMPD1 (6 of 6)	FERM and PDZ domain containing 1	-1.00593	6.04554	-5.50791	4.63669e-05	0.00178386	2.13511	NA
13128499	BC090699	chaf1a	chromatin assembly factor 1, subunit A (p150)	1.25324	6.70399	5.5071	4.64404e-05	0.00178405	2.13354	563212
13176056	XM_001337127	LOC796777	leucine-rich repeat and fibronectin type-III domain-containing protein 6-like	-1.03452	5.01265	-5.50411	4.67138e-05	0.00179191	2.12774	796777
13052591	XM_680029	si:busm1-234g15.3	si:busm1-234g15.3	-0.788593	5.62373	-5.49949	4.71404e-05	0.00180561	2.11875	NA
13049095	NM_001193539	arhgap11a	Rho GTPase activating protein 11A	0.767068	6.30719	5.49755	4.73206e-05	0.00180986	2.11498	406608
13077889	XM_002665601	LOC564151	claspin-like	0.939132	6.17075	5.4958	4.7484e-05	0.00181344	2.11157	NA
13283060	JQ994491	sprn	shadow of prion protein	-0.959721	7.10932	-5.49448	4.76071e-05	0.00181548	2.10901	386702
13206654	AF373976	atp1b2b	ATPase, Na+/K+ transporting, beta 2b polypeptide	-1.34125	7.80485	-5.49362	4.76882e-05	0.00181592	2.10733	114457
13272467	ENSDART00000127861	LOC100536006	envoplakin-like	-1.01904	6.42215	-5.48715	4.82989e-05	0.00183381	2.09475	NA
12960821	XM_001334062	LOC794185	uncharacterized LOC794185	-1.5537	5.54046	-5.48742	4.82727e-05	0.00183381	2.09529	NA
13061652	XM_687130	si:ch73-386h18.1	si:ch73-386h18.1	1.1827	9.53008	5.48381	4.86174e-05	0.00184321	2.08825	563768
13139417	XM_003201190	LOC100537460	uncharacterized LOC100537460	-1.07418	7.42926	-5.48153	4.88362e-05	0.00184882	2.08382	NA
13201500	XM_692321	LOC568961	uncharacterized protein C9orf172-like	-0.804124	6.34994	-5.48024	4.89605e-05	0.00185084	2.0813	NA
13021230	XM_690110	frya	furry homolog a (Drosophila)	-0.836619	6.60001	-5.47601	4.93694e-05	0.00186089	2.07308	566822
13176744	XM_689488	LOC566220	contactin-associated protein 1-like	-1.03014	5.48278	-5.47631	4.93407e-05	0.00186089	2.07365	NA
12961453	XM_682133	sh2d3ca	SH2 domain containing 3Ca	0.641001	6.42346	5.46881	5.00753e-05	0.00187394	2.05904	558860
13245034	NM_001128269	itpr3	inositol 1,4,5-triphosphate receptor, type 3	-0.560444	5.88393	-5.47078	4.98813e-05	0.00187394	2.06288	794666
13146228	EU069395	vipr2	vasoactive intestinal peptide receptor 2	-0.738748	4.79575	-5.46889	5.00669e-05	0.00187394	2.05921	81886
13179693	XM_002661338	LOC100334697	crystal protein-like	-1.23435	5.49771	-5.47026	4.99321e-05	0.00187394	2.06188	100334697
13281306	ENSDART00000143986	ABI3BP (2 of 2)	ABI family, member 3 (NESH) binding protein	-1.2779	5.59085	-5.47015	4.99431e-05	0.00187394	2.06166	NA
13082622	AY286489	tnr	tenascin R (restrictin, janusin)	-1.04101	6.9913	-5.46708	5.02463e-05	0.00187764	2.05567	369191
13191987	EF395230	dnm1a	dynamin 1a	-0.967055	6.97766	-5.46635	5.03185e-05	0.00187764	2.05425	100307098
13098347	XM_678081	mcm9	minichromosome maintenance complex component 9	0.727252	4.89852	5.46362	5.05902e-05	0.00187992	2.04893	555610
13028978	XM_002664026	ascc3	activating signal cointegrator 1 complex subunit 3	0.642431	7.15001	5.46402	5.05501e-05	0.00187992	2.04971	100332599
13033368	XM_001332476	LOC793222	cAMP-dependent protein kinase inhibitor alpha-like	-0.679892	5.52612	-5.46356	5.05961e-05	0.00187992	2.04882	NA
13081588	BC128846	tesk2	testis-specific kinase 2	-1.02608	7.41369	-5.45939	5.10135e-05	0.00189273	2.04069	568213
13205903	NM_001128543	LOC567525	novel protein similar to vertebrate fibrinogen C domain containing 1 (FIBCD1)	-0.789544	5.84091	-5.45479	5.14777e-05	0.00190453	2.03174	NA
13240303	XM_682361	LOC565973	GRAM domain-containing protein 2-like	-0.833243	5.89707	-5.45519	5.14372e-05	0.00190453	2.03252	NA
12945534	XM_001921041	LOC799225	SH3PX1-like	-1.1918	5.10591	-5.4534	5.16195e-05	0.00190707	2.02902	NA
13108195	AF506206	sdad1	SDA1 domain containing 1	1.87186	6.82303	5.44659	5.23178e-05	0.0019168	2.01573	286746
13283290	BC129333	hist2h3c	histone cluster 2, H3c	1.20129	9.27445	5.44715	5.22593e-05	0.0019168	2.01684	570618
13225488	XM_001335100	LOC100000783	histone H2A-like	1.18654	8.68137	5.44652	5.23246e-05	0.0019168	2.0156	NA
12962824	GQ489192	nlgn2a	neuroligin 2a	-0.929415	7.35136	-5.44754	5.22194e-05	0.0019168	2.01759	556158
12965433	XM_002667837	LOC100333757	gamma-glutamyltransferase 5-like	-1.15271	4.6598	-5.44872	5.20979e-05	0.0019168	2.0199	NA
13282776	BC093268	c1qtnf4	C1q and tumor necrosis factor related protein 4	-1.25513	6.29045	-5.44693	5.22824e-05	0.0019168	2.0164	550397
13217575	ENSDART00000110219	zgc:171476	zgc:171476	1.40841	6.62971	5.44312	5.26772e-05	0.00192408	2.00896	NA
12988686	BC048877	polr3e	polymerase (RNA) III (DNA directed) polypeptide E	1.09795	6.95197	5.44247	5.2745e-05	0.00192408	2.00769	336518
13188962	AY584747	lin7a	lin-7 homolog A (C. elegans)	-0.830536	6.35707	-5.4425	5.2742e-05	0.00192408	2.00775	393682
13205201	BC124779	c2cd2l	c2cd2-like	-0.616847	6.36166	-5.43985	5.30186e-05	0.00192457	2.00258	566488
12947173	HE577852	gucy1a3	guanylate cyclase 1, soluble, alpha 3	-0.845949	5.27929	-5.44078	5.29208e-05	0.00192457	2.0044	550420
12982779	BC155847	rac3b	ras-related C3 botulinum toxin substrate 3b (rho family, small GTP binding protein Rac3)	-1.12204	6.73808	-5.4388	5.31278e-05	0.00192457	2.00054	795167
13280364	ENSDART00000138858	myh11a	myosin, heavy polypeptide 11, smooth muscle a	-1.29201	6.58268	-5.4394	5.30649e-05	0.00192457	2.00171	554168
13015447	BC117648	npas4a	neuronal PAS domain protein 4a	-1.36542	6.31659	-5.44061	5.29386e-05	0.00192457	2.00407	724016
13223966	XM_002662542	rbpjl	recombination signal binding protein for immunoglobulin kappa J region-like	-1.02072	5.12108	-5.43586	5.34375e-05	0.0019331	1.9948	503870
13015338	XM_688989	LOC565718	melatonin receptor type 1A-A-like	-1.09874	5.82862	-5.43386	5.36484e-05	0.00193536	1.9909	NA
13118936	XM_002667333	wu:fd14a01	wu:fd14a01	-1.55822	6.07979	-5.43408	5.36255e-05	0.00193536	1.99132	100008376
13164075	BC049449	nol12	nucleolar protein 12	0.788409	6.80389	5.43217	5.38281e-05	0.00193915	1.9876	393260
13089672	BC060916	amph	amphiphysin	-0.87839	7.54802	-5.43123	5.39287e-05	0.00194009	1.98575	393804
13193806	XM_682863	tmem119a	transmembrane protein 119a	-1.02899	5.41929	-5.4256	5.45316e-05	0.00195908	1.97476	559518
13116455	ENSDART00000100685	LRFN4 (2 of 2)	leucine rich repeat and fibronectin type III domain containing 4	-0.738033	6.44658	-5.42072	5.50597e-05	0.00197532	1.96523	NA
12988406	FJ269020	kcnma1b	potassium large conductance calcium-activated channel, subfamily M, alpha member 1b	-1.0368	5.29509	-5.41953	5.51893e-05	0.00197725	1.96291	798583
13112654	XM_001340672	LOC100000526	protein transport protein Sec24A-like	0.752747	7.10206	5.4178	5.53787e-05	0.00197997	1.95952	NA
13197094	NM_001105105	prdm8b	PR domain containing 8b	-0.800411	6.82797	-5.41537	5.56454e-05	0.00197997	1.95477	557162
13219403	BC124512	desmb	desmin b	-1.10518	5.27677	-5.41577	5.56018e-05	0.00197997	1.95555	768287
13166263	FJ221370	zwi	zwilling	-1.31917	5.01296	-5.41665	5.55047e-05	0.00197997	1.95727	336211
12951391	AB235997	c3b	complement component c3b	-1.88806	3.80401	-5.41545	5.56366e-05	0.00197997	1.95493	NA
13151169	BC076185	pdha1b	pyruvate dehydrogenase (lipoamide) alpha 1b	-0.810915	4.57063	-5.41184	5.6035e-05	0.00199111	1.94787	436672
13155623	AF030285	dbx1b	developing brain homeobox 1b	1.04227	5.73494	5.41027	5.6209e-05	0.00199186	1.94481	30416
13195496	XM_689875	si:ch211-117m20.4	si:ch211-117m20.4	-1.70279	6.11897	-5.41063	5.61694e-05	0.00199186	1.9455	566599
13183030	XM_692346	slc6a1l	solute carrier family 6 (neurotransmitter transporter, GABA), member 1, like	-1.23242	5.24303	-5.40958	5.62857e-05	0.00199187	1.94346	568985
13107062	ENSDART00000044184	NOP14	NOP14 nucleolar protein	0.984515	7.2836	5.40736	5.65332e-05	0.00199792	1.93912	NA
13095187	BC128790	fam167ab	family with sequence similarity 167, member Ab	0.872493	6.05521	5.39723	5.7678e-05	0.00203298	1.9193	567341
13215535	BC129332	zgc:158628	zgc:158628	-1.41768	4.68669	-5.3972	5.76814e-05	0.00203298	1.91924	NA
13149700	XM_690167	LOC566883	potassium voltage-gated channel subfamily B member 2-like	-0.738574	6.2049	-5.39438	5.80048e-05	0.00204161	1.91372	NA
13020922	BC124768	zgc:153898	zgc:153898	-0.71012	5.95004	-5.39176	5.83066e-05	0.00204947	1.90858	NA
13168004	BC162065	zgc:193504	zgc:193504	-1.10098	6.11276	-5.39094	5.84013e-05	0.00205003	1.90698	NA
13113731	XM_001920397	pde8b	phosphodiesterase 8B	-0.847165	6.59028	-5.38833	5.87041e-05	0.00205788	1.90187	571011
13107018	BC066517	nup54	nucleoporin 54	0.674536	8.25621	5.38693	5.88671e-05	0.00205806	1.89913	335750
13131516	BC056567	mybpha	myosin binding protein Ha	-1.51054	5.80719	-5.38724	5.88311e-05	0.00205806	1.89973	393530
13035054	GQ229459	col27a1a	collagen, type XXVII, alpha 1a	-0.614795	5.89849	-5.38056	5.9614e-05	0.00208138	1.88666	100004688
13033550	ENSDART00000084923	LOC565172	uncharacterized LOC565172	0.810178	7.16594	5.3702	6.08509e-05	0.00211888	1.86636	NA
12983077	BC135098	zgc:163073	zgc:163073	-1.92393	5.93724	-5.37039	6.08277e-05	0.00211888	1.86674	100037358
12978115	AY648840	ect2	epithelial cell transforming sequence 2 oncogene	0.862381	7.08426	5.36773	6.115e-05	0.00212645	1.86151	445406
13131298	XM_694462	si:ch73-142c19.2	si:ch73-142c19.2	-0.825028	5.36179	-5.36237	6.18034e-05	0.00213205	1.851	NA
12968328	XM_001920319	LOC100149844	fibroblast growth factor 11-like	-0.882745	5.84463	-5.3635	6.16655e-05	0.00213205	1.85321	NA
13049643	XM_684566	vsnl1b	visinin-like 1b	-1.04082	8.81123	-5.36538	6.14357e-05	0.00213205	1.8569	561162
13301878	XM_003198685	LOC100537120	serine/threonine-protein phosphatase with EF-hands 2-like	-1.07296	4.92567	-5.36171	6.18839e-05	0.00213205	1.84972	NA
12972120	BC054636	cpne5	copine V	-1.09884	6.00987	-5.36234	6.18069e-05	0.00213205	1.85095	NA
13214983	XM_001923825	LOC100148308	uncharacterized LOC100148308	-1.20259	4.47817	-5.36315	6.17075e-05	0.00213205	1.85254	NA
12947212	BC090419	mxd4	MAX dimerization protein 4	-1.45855	7.293	-5.36364	6.1648e-05	0.00213205	1.85349	559531
12986459	BC154551	plekhs1	pleckstrin homology domain containing, family S member 1	0.8597	3.61782	5.35778	6.23693e-05	0.0021438	1.84199	100136845
12997013	BC124701	khdrbs2	KH domain containing, RNA binding, signal transduction associated 2	-0.960899	7.45716	-5.35761	6.23896e-05	0.0021438	1.84167	768147
12965118	XM_002663619	LOC100332644	galactosylgalactosylxylosylprotein 3-beta-glucuronosyltransferase 1-like	-0.763178	5.81164	-5.35191	6.30994e-05	0.00216248	1.83049	NA
13283978	AY763410	kctd8	potassium channel tetramerisation domain containing 8	-0.818885	6.15311	-5.35242	6.30359e-05	0.00216248	1.83148	568933
13045722	XM_001344434	LOC100005402	SH3 and cysteine-rich domain-containing protein-like	-0.6998	5.23955	-5.34574	6.38768e-05	0.00218625	1.81838	NA
13002316	BC160617	gfra4	GDNF family receptor alpha 4	-0.790002	5.87144	-5.34386	6.41162e-05	0.00219156	1.81468	NA
13099991	BC065672	rpf2	ribosome production factor 2 homolog (S. cerevisiae)	1.21606	6.57413	5.34044	6.45535e-05	0.00220362	1.80796	406587
13222813	NM_001004533	slc6a13	solute carrier family 6 (neurotransmitter transporter, GABA), member 13	-0.727438	5.51863	-5.33888	6.47533e-05	0.0022056	1.80491	368923
12979218	XM_681491	LOC558290	synaptoporin-like	-1.80521	5.91545	-5.33867	6.4781e-05	0.0022056	1.80448	NA
13238598	XM_001922407	chrm4a	cholinergic receptor, muscarinic 4a	-1.0004	6.11449	-5.32936	6.59906e-05	0.00224093	1.78619	100150701
13077609	XM_001338025	samd12	sterile alpha motif domain containing 12	-1.0245	5.08359	-5.32974	6.59406e-05	0.00224093	1.78694	797592
13282434	BC076293	lyrm1	LYR motif containing 1	1.12738	6.24799	5.32837	6.61197e-05	0.00224239	1.78426	436779
12975479	XM_680794	trmt1	tRNA methyltransferase 1 homolog (S. cerevisiae)	1.02272	5.44844	5.32439	6.66449e-05	0.00225726	1.77644	553298
13195418	BC127593	zgc:158412	zgc:158412	-0.981032	5.11571	-5.31897	6.73678e-05	0.00227878	1.76577	566090
13226186	XM_003198906	LOC100537053	a-kinase anchor protein 13-like	-0.772223	5.373	-5.31724	6.75996e-05	0.00228366	1.76238	NA
13133268	XM_686911	LOC563546	ubiquitin carboxyl-terminal hydrolase 21-like	-1.66863	5.50335	-5.31573	6.78034e-05	0.00228757	1.7594	NA
12946750	XM_002660451	LOC100332251	multiple PDZ domain protein-like	-0.633888	4.63033	-5.31254	6.82357e-05	0.00229621	1.75312	NA
12991127	BC090494	shisa9	shisa homolog 9 (Xenopus laevis)	-0.762997	5.55469	-5.31279	6.82005e-05	0.00229621	1.75363	NA
12947934	AY173030	gli1	GLI-Kruppel family member 1	0.759583	6.88368	5.31054	6.85074e-05	0.00230238	1.74919	352930
13168482	BC055154	prkcbb	protein kinase C, beta b	-0.681782	6.75099	-5.30774	6.88894e-05	0.00231223	1.74369	393953
13045256	AY099524	ttc27	tetratricopeptide repeat domain 27	0.911191	6.41757	5.30512	6.92496e-05	0.00232133	1.73854	317640
13056959	BC065322	cirh1a	cirrhosis, autosomal recessive 1A (cirhin)	1.2542	5.23857	5.30382	6.94293e-05	0.00232436	1.73598	406571
13073745	BC079490	ncaldb	neurocalcin delta b	-1.34481	5.99709	-5.30261	6.95978e-05	0.00232702	1.73358	445319
13109359	AY437556	nkx6.1	NK6 transcription factor related, locus 1 (Drosophila)	1.17058	7.77834	5.30155	6.9744e-05	0.00232891	1.7315	436748
13023496	AY391466	tfdp2	transcription factor Dp-2	0.964761	7.27324	5.29324	7.09087e-05	0.00236175	1.71513	338204
13236461	BC065331	rcor2	REST corepressor 2	0.826858	6.05052	5.29348	7.08743e-05	0.00236175	1.71561	402934
13259610	AY738749	crygm1	crystallin, gamma M1	-2.27921	5.28662	-5.29101	7.12239e-05	0.00236922	1.71075	493630
13276776	XM_690492	lactbl1b	lactamase, beta-like 1b	-1.30026	5.75864	-5.28791	7.1666e-05	0.00238088	1.70463	567200
13160922	XM_682696	LOC559362	carabin-like	0.563282	5.99784	5.28588	7.19556e-05	0.00238746	1.70064	NA
13247043	AY605665	ncs1b	neuronal calcium sensor 1b	-0.687142	5.07481	-5.28399	7.22275e-05	0.00239343	1.69691	553174
13276646	ENSDART00000135527	lin54	lin-54 homolog	0.804768	7.51281	5.2809	7.26736e-05	0.00240516	1.69083	560688
13300780	BC167474	si:ch211-239j19.3	si:ch211-239j19.3	1.13873	5.05819	5.27828	7.30539e-05	0.00241467	1.68567	NA
13087708	BC155646	fam131a	family with sequence similarity 131, member A	-1.04997	6.11028	-5.27735	7.31894e-05	0.00241608	1.68383	100136860
13258619	NM_001128362	si:dkey-56k23.2	si:dkey-56k23.2	0.727711	7.37552	5.27454	7.36018e-05	0.00242662	1.67828	NA
13117804	AF387341	unc119b	unc-119 homolog b (C. elegans)	-0.843634	5.70911	-5.27341	7.37674e-05	0.00242743	1.67606	678653
13066618	XM_001343070	LOC100003594	protein FAM135B-like	-1.07433	6.70795	-5.2731	7.38128e-05	0.00242743	1.67545	NA
13034548	BC096955	smg5	Smg-5 homolog, nonsense mediated mRNA decay factor (C. elegans)	0.528522	6.19931	5.27185	7.39973e-05	0.00243043	1.67298	553261
13274647	XM_003199448	LOC100537469	probable G-protein coupled receptor 179-like	-1.23151	5.56957	-5.26891	7.44319e-05	0.00244163	1.66719	NA
13193540	XM_678989	acacb	acetyl-CoA carboxylase beta	-0.75291	6.53602	-5.26327	7.5275e-05	0.00246618	1.65606	556236
13046219	XM_680547	LOC557467	kelch repeat and BTB domain-containing protein 11-like	-0.796695	5.23166	-5.26152	7.55387e-05	0.00247171	1.6526	NA
13005769	BC115227	kmo	kynurenine 3-monooxygenase	-1.75894	6.98811	-5.26031	7.57206e-05	0.00247455	1.65022	368242
12975917	XM_680598	LOC557518	transketolase-like	-1.22819	7.30884	-5.25884	7.5944e-05	0.00247875	1.64731	NA
12958902	BC133161	zgc:158803	zgc:158803	0.946701	5.71024	5.25674	7.62623e-05	0.00248602	1.64318	100038767
12946585	NM_131638	pax5	paired box gene 5	1.10596	5.99664	5.25475	7.65658e-05	0.00249279	1.63925	60636
13219386	XM_001923383	LOC794660	chondroitin sulfate synthase 2-like	-1.15949	6.16335	-5.25107	7.71304e-05	0.00250491	1.63199	794660
13060471	XM_003200487	LOC100534758	uncharacterized LOC100534758	-1.45465	3.85089	-5.25126	7.7102e-05	0.00250491	1.63235	NA
13076760	XM_003200631	calcr	calcitonin receptor	-0.967356	5.59204	-5.24173	7.85838e-05	0.00254893	1.61353	560268
13246600	AF024536	atoh1a	atonal homolog 1a	0.882311	5.76383	5.23991	7.88707e-05	0.00255334	1.60993	30303
13115221	BC059516	rbp4l	retinol binding protein 4, like	-1.52849	5.94382	-5.23962	7.89156e-05	0.00255334	1.60937	335651
13104804	NM_001030275	ptrhd1	peptidyl-tRNA hydrolase domain containing 1	0.657624	5.91914	5.23029	8.04026e-05	0.00259822	1.59091	563207
13263684	XM_003199159	rrp1	ribosomal RNA processing 1 homolog (S. cerevisiae)	1.17279	7.35631	5.22695	8.09411e-05	0.00261238	1.58431	321059
13145622	ENSDART00000146580	mybl1	v-myb myeloblastosis viral oncogene homolog (avian)-like 1	0.867444	6.69755	5.22469	8.13082e-05	0.00261949	1.57984	558540
13274438	XM_002667565	LOC100330122	c-type lectin domain family 3 member A-like	-1.05145	5.06392	-5.22416	8.13947e-05	0.00261949	1.57879	NA
13207490	AY727858	slc4a4a	solute carrier family 4, member 4a	-1.10808	7.18029	-5.22374	8.1463e-05	0.00261949	1.57796	568631
13282926	BC097188	zgc:114130	zgc:114130	0.766706	7.48644	5.22196	8.1753e-05	0.00262557	1.57445	570332
13144721	BC057531	ngdn	neuroguidin, EIF4E binding protein	0.774503	5.26674	5.22028	8.20286e-05	0.00263081	1.57112	386642
13260552	XM_692603	mcf2l	MCF.2 cell line derived transforming sequence-like	-0.785347	5.06013	-5.21973	8.2118e-05	0.00263081	1.57004	NA
13253039	XM_691149	si:ch211-163l21.4	si:ch211-163l21.4	1.22773	6.96567	5.2148	8.29321e-05	0.00265037	1.56029	567844
13144781	XM_001920386	crispld1a	cysteine-rich secretory protein LCCL domain containing 1a	-1.05257	5.61817	-5.21529	8.2852e-05	0.00265037	1.56125	100149104
13053629	DQ516345	dtnbb	dystrobrevin, beta b	-0.780876	6.7846	-5.21239	8.33337e-05	0.00265906	1.55552	559786
13283712	BC154517	zgc:172076	zgc:172076	-0.847829	4.98902	-5.21195	8.34082e-05	0.00265906	1.55463	563955
13217667	BC067708	aamp	angio-associated, migratory cell protein	0.81886	6.47206	5.21122	8.35293e-05	0.00265966	1.5532	405874
13074027	XM_001920647	LOC563393	novel protein similar to vertebrate regulating synaptic membrane exocytosis protein family	-0.792721	6.56286	-5.20715	8.42126e-05	0.00267815	1.54515	NA
13227910	XM_682334	shroom4	shroom family member 4	0.729418	6.16013	5.20314	8.48925e-05	0.00268991	1.5372	559035
13283786	BC155335	ccdc85a	coiled-coil domain containing 85A	-0.748518	5.8529	-5.20393	8.47581e-05	0.00268991	1.53876	100141348
13263327	XM_001341872	LOC100002026	protocadherin-8-like	-0.862808	6.45303	-5.20347	8.48364e-05	0.00268991	1.53785	NA
13117896	XM_003200895	sgk494b	uncharacterized serine/threonine-protein kinase SgK494b	-0.907104	6.51816	-5.20192	8.51002e-05	0.00269322	1.53478	100537227
13077835	BC129193	zgc:158297	zgc:158297	0.830219	6.20087	5.20031	8.53752e-05	0.00269864	1.53159	NA
13162128	BC058298	irf7	interferon regulatory factor 7	1.95854	5.70381	5.19908	8.55857e-05	0.00270202	1.52916	393650
13020830	ENSDART00000029459	GIPR	gastric inhibitory polypeptide receptor	-0.889237	5.35521	-5.1929	8.6652e-05	0.00273237	1.51692	NA
13246541	AY147850	scrt2	scratch homolog 2, zinc finger protein (Drosophila)	1.03058	9.47008	5.19227	8.67614e-05	0.00273251	1.51567	325372
13136554	XM_002666544	nfxl1	nuclear transcription factor, X-box binding-like 1	0.837558	6.43164	5.1888	8.73675e-05	0.00274696	1.50879	100333008
12944494	XM_001922343	rcan1b	regulator of calcineurin 1b	-0.735339	6.69147	-5.18843	8.74311e-05	0.00274696	1.50807	336348
13112374	BC100010	dkc1	dyskeratosis congenita 1, dyskerin	1.088	7.61527	5.18547	8.79524e-05	0.00275906	1.50219	613144
13005592	XM_002664212	loxl4	lysyl oxidase-like 4	-0.822518	5.64013	-5.18444	8.81341e-05	0.00275906	1.50015	100320658
13007152	BC059480	arl3l2	ADP-ribosylation factor-like 3, like 2	-1.33107	4.66217	-5.18491	8.80511e-05	0.00275906	1.50109	393692
13222612	XM_001340198	LOC799930	transmembrane prolyl 4-hydroxylase-like	-0.941902	6.28914	-5.18257	8.84658e-05	0.00276612	1.49644	NA
13021771	BC092835	rhbdd1	rhomboid domain containing 1	0.960562	6.56829	5.18174	8.86135e-05	0.00276742	1.49479	550277
13169505	ENSDART00000109622	LOC563218	recQ-mediated genome instability protein 2-like	0.813626	6.23414	5.17999	8.89244e-05	0.00277105	1.49133	NA
13009033	AB121758	nkx1.2lb	NK1 transcription factor related 2-like,b	0.630126	5.43867	5.17989	8.89425e-05	0.00277105	1.49113	407077
13256686	XM_001342148	LOC100002384	cytochrome c oxidase subunit 5B, mitochondrial-like	-1.47502	5.64505	-5.17856	8.91795e-05	0.00277511	1.4885	NA
13226841	XM_686268	wu:fb25b09	wu:fb25b09	1.47068	8.19396	5.17547	8.97337e-05	0.00278903	1.48237	NA
12948152	XM_001344524	epha6	eph receptor A6	-0.706678	5.57984	-5.17384	9.00284e-05	0.00279152	1.47913	100005538
13068429	XM_003200571	cpne4	copine IV	-1.2462	5.86267	-5.17433	8.99394e-05	0.00279152	1.48011	NA
13262471	BC095089	pcbp3	poly(rC) binding protein 3	-0.994391	8.2003	-5.17217	9.03308e-05	0.00279757	1.47582	553765
13135737	BC162691	hoxc1a	homeo box C1a	1.37622	6.10193	5.17135	9.04786e-05	0.00279882	1.4742	58046
13162294	XM_001922088	LOC100149853	hyaluronidase-4-like	-1.3428	6.3166	-5.16927	9.08586e-05	0.00280724	1.47006	NA
12952437	BC092729	zgc:110091	zgc:110091	0.951499	7.09925	5.16456	9.172e-05	0.00282777	1.46073	NA
13242289	XM_002663157	LOC100329477	solute carrier family 12 member 2-like	-1.25821	5.08625	-5.16446	9.17401e-05	0.00282777	1.46052	100329477
12963799	AY819033	dlg2	discs, large (Drosophila) homolog 2	-0.795809	6.35192	-5.16265	9.2074e-05	0.0028347	1.45693	497638
13210427	GU299121	ugt2a1	UDP glucuronosyltransferase 2 family, polypeptide A1	-0.795935	4.06855	-5.16015	9.25361e-05	0.00284411	1.45198	100006320
13081907	XM_679858	neto1	neuropilin (NRP) and tolloid (TLL)-like 1	-1.19121	4.40633	-5.15982	9.2598e-05	0.00284411	1.45132	556922
13250219	XM_003199046	LOC798555	dihydropyrimidinase-related protein 2-like	-1.01555	7.28992	-5.15818	9.29035e-05	0.00285013	1.44806	NA
12969387	BC052111	znf259	zinc finger protein 259	1.32304	7.3437	5.14968	9.45046e-05	0.00289584	1.43117	NA
13096027	NM_001199990	cep135	centrosomal protein 135	0.763926	4.951	5.1482	9.47851e-05	0.00289767	1.42824	553303
13030002	BC076364	zgc:92912	zgc:92912	-1.27157	7.06407	-5.14819	9.47868e-05	0.00289767	1.42822	436805
13093838	XM_002667120	LOC100330551	laminin subunit alpha-2-like	0.788177	7.35864	5.14455	9.54837e-05	0.00291556	1.42098	NA
13133616	XM_692063	lactbl1a	lactamase, beta-like 1a	-0.962841	4.46687	-5.14189	9.59954e-05	0.00292775	1.4157	568717
13001817	XM_694860	rps6ka2	ribosomal protein S6 kinase, 90kDa, polypeptide 2	-0.925284	5.71091	-5.14094	9.61785e-05	0.0029299	1.41382	571285
13271450	XM_002663046	LOC100335008	GRAM domain-containing protein 3-like	-0.755973	4.7949	-5.13949	9.646e-05	0.00293485	1.41093	100335008
13009312	AF533646	aldob	aldolase b, fructose-bisphosphate	-0.997916	6.86317	-5.13894	9.65665e-05	0.00293485	1.40984	321664
13214061	XR_084286	si:ch73-194h10.2	si:ch73-194h10.2	-1.03511	5.26374	-5.13726	9.68923e-05	0.00294132	1.40651	558959
13072137	BC125962	bop1	block of proliferation 1	1.15688	7.09918	5.13573	9.71913e-05	0.00294697	1.40346	777627
13287958	BC085394	LOC792150	uncharacterized LOC792150	0.622958	5.89497	5.13106	9.81093e-05	0.00297134	1.39417	792150
13239858	ENSDART00000073815	PAQR9	progestin and adipoQ receptor family member IX	-0.994173	6.67574	-5.13033	9.82526e-05	0.00297223	1.39273	NA
13084511	AB158461	hes6	hairy and enhancer of split 6 (Drosophila)	0.566489	4.14646	5.12689	9.8936e-05	0.00298943	1.38588	373116
13157320	BC155290	sema7a	semaphorin 7A	-1.00974	5.47723	-5.11846	0.000100628	0.00303704	1.36912	324910
13147219	BC077112	riok3	RIO kinase 3 (yeast)	1.84997	9.00047	5.11736	0.000100851	0.00303886	1.36693	445220
12988555	XM_001334721	si:ch1073-357b18.4	si:ch1073-357b18.4	0.72314	7.18929	5.11653	0.000101019	0.00303886	1.36528	797129
13007908	XM_001919406	LOC100003272	storkhead-box protein 2-like	0.660256	7.88846	5.11644	0.000101039	0.00303886	1.36509	NA
12958979	BC114306	zgc:136908	zgc:136908	-1.15106	5.01634	-5.11432	0.00010147	0.00304831	1.36088	563679
13160663	NM_200503	prmt7	protein arginine N-methyltransferase 7	0.648152	5.45276	5.1079	0.000102791	0.0030836	1.3481	393475
13080414	XM_678580	pip4k2ab	phosphatidylinositol-5-phosphate 4-kinase, type II, alpha b	-0.775813	6.42021	-5.10746	0.000102881	0.0030836	1.34723	555920
13281008	BC057490	wdr3	WD repeat domain 3	1.33665	7.49607	5.10192	0.000104036	0.00311372	1.3362	321058
13282908	BC097060	zgc:113984	zgc:113984	0.903542	9.87929	5.10036	0.000104364	0.00311372	1.33308	573997
13065548	NM_001083045	sphkap	SPHK1 interactor, AKAP domain containing	-0.697775	5.74896	-5.10069	0.000104295	0.00311372	1.33374	100034387
13048206	XM_003200381	LOC100537793	uncharacterized LOC100537793	-1.12413	5.04296	-5.10112	0.000104205	0.00311372	1.33459	NA
13030076	BC090426	vars	valyl-tRNA synthetase	0.762216	6.69893	5.09929	0.00010459	0.00311669	1.33095	114427
[truncated: 587 more rows]

## Sheet: RS-MO
PROBEID	ID	SYMBOL	GENENAME	logFC	AveExpr	t	P.Value	adj.P.Val	B	ENTREZID			Differentially expressed genes :: LEPA rescue compared to LEPA morpholino knockdown
[truncated: 1,716 more rows]

[truncated: 4 more sheets: RS-WT, TRANSCRIPTION.FACTORS.MO-WT, KEGG, GO]
